# Supplementary material for: 17β-Estradiol Delivered in Eye Drops: Evidence of Impact on Protein Networks and Associated Biological Processes in the Rat Retina through Quantitative Proteomics
Source: MDPI journal article supplement (doi:10.3390/pharmaceutics12020101), 2020-01-27
Supplement: s1 [file s1]

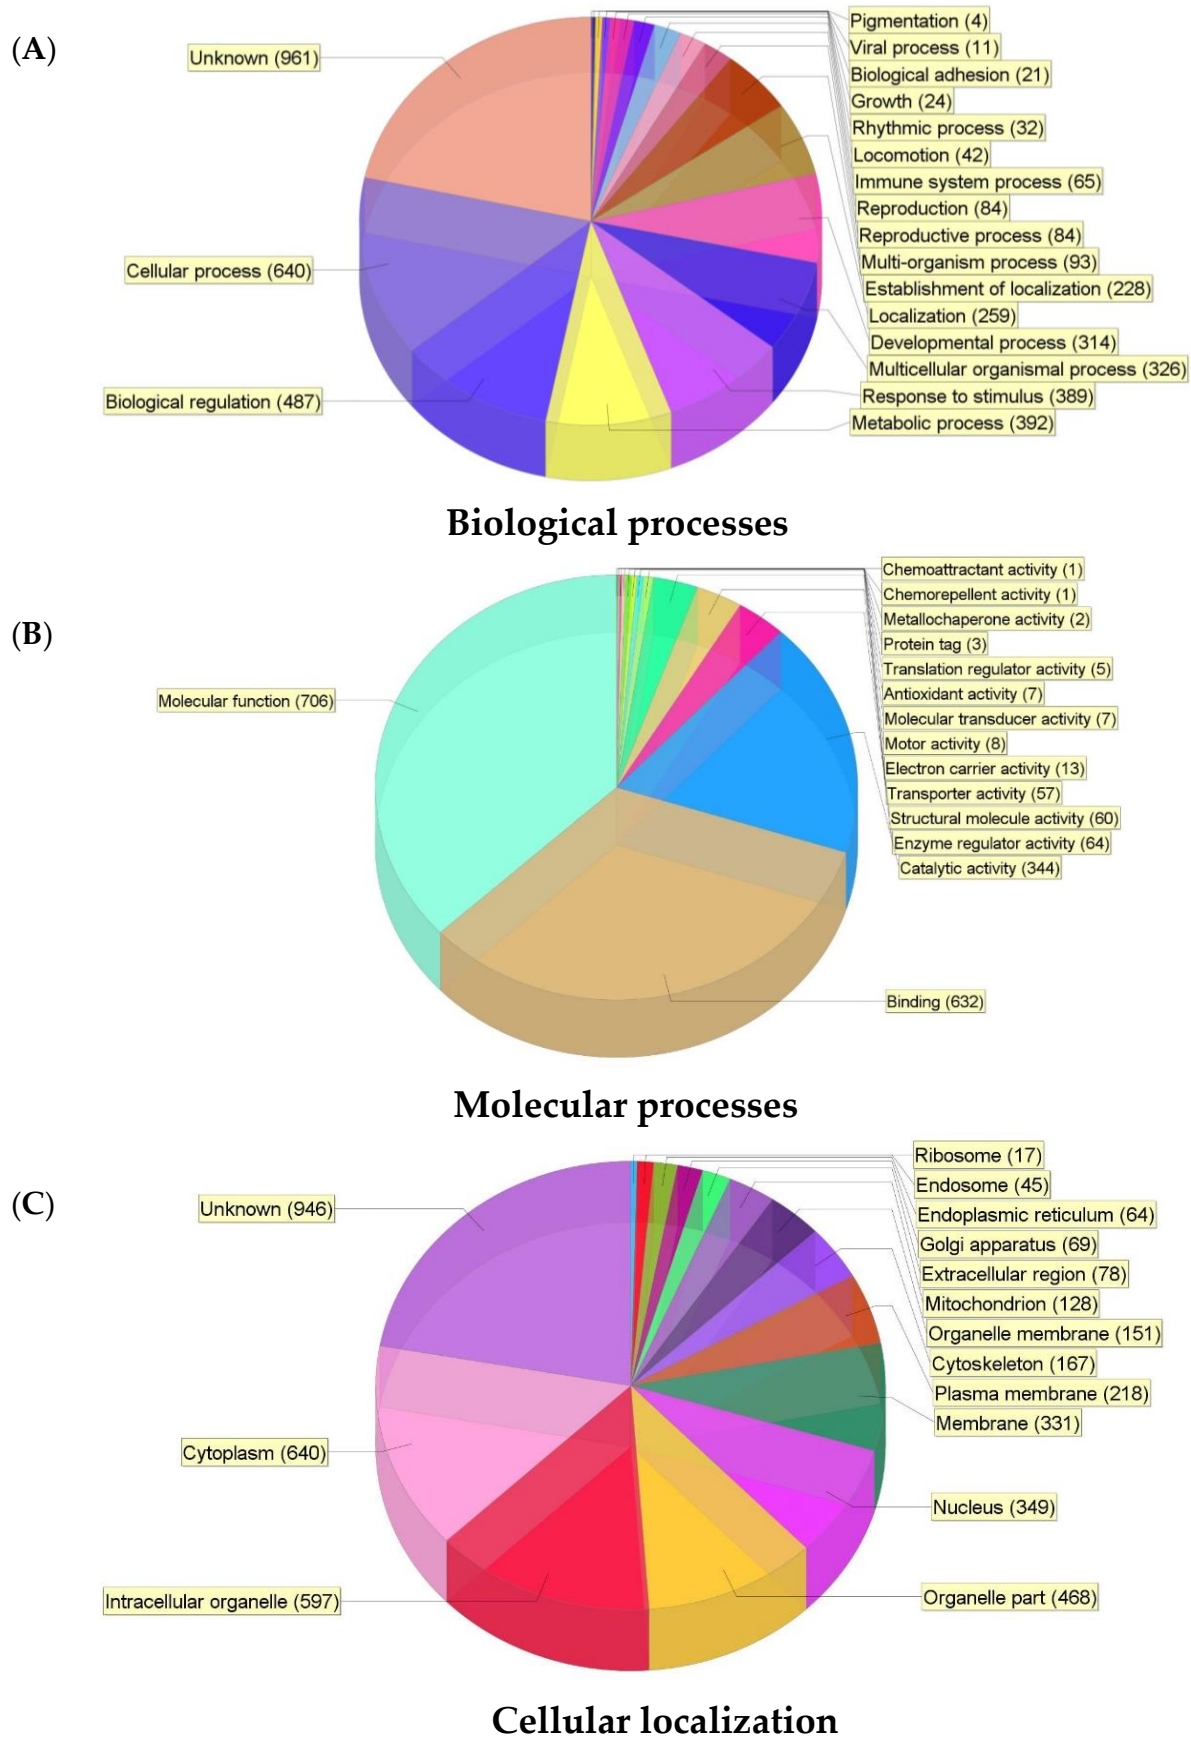

**Figure S1.** Biological processes and molecular processes associated with the identified rat retina proteins, and cellular localization of the identified rat retina proteins. (A) Biological processes; (B) Molecular processes; (C) Cellular localization. Information was compiled from validated identifications using Scaffold (version 4.9.0; Proteome Software, Portland, OR, USA).

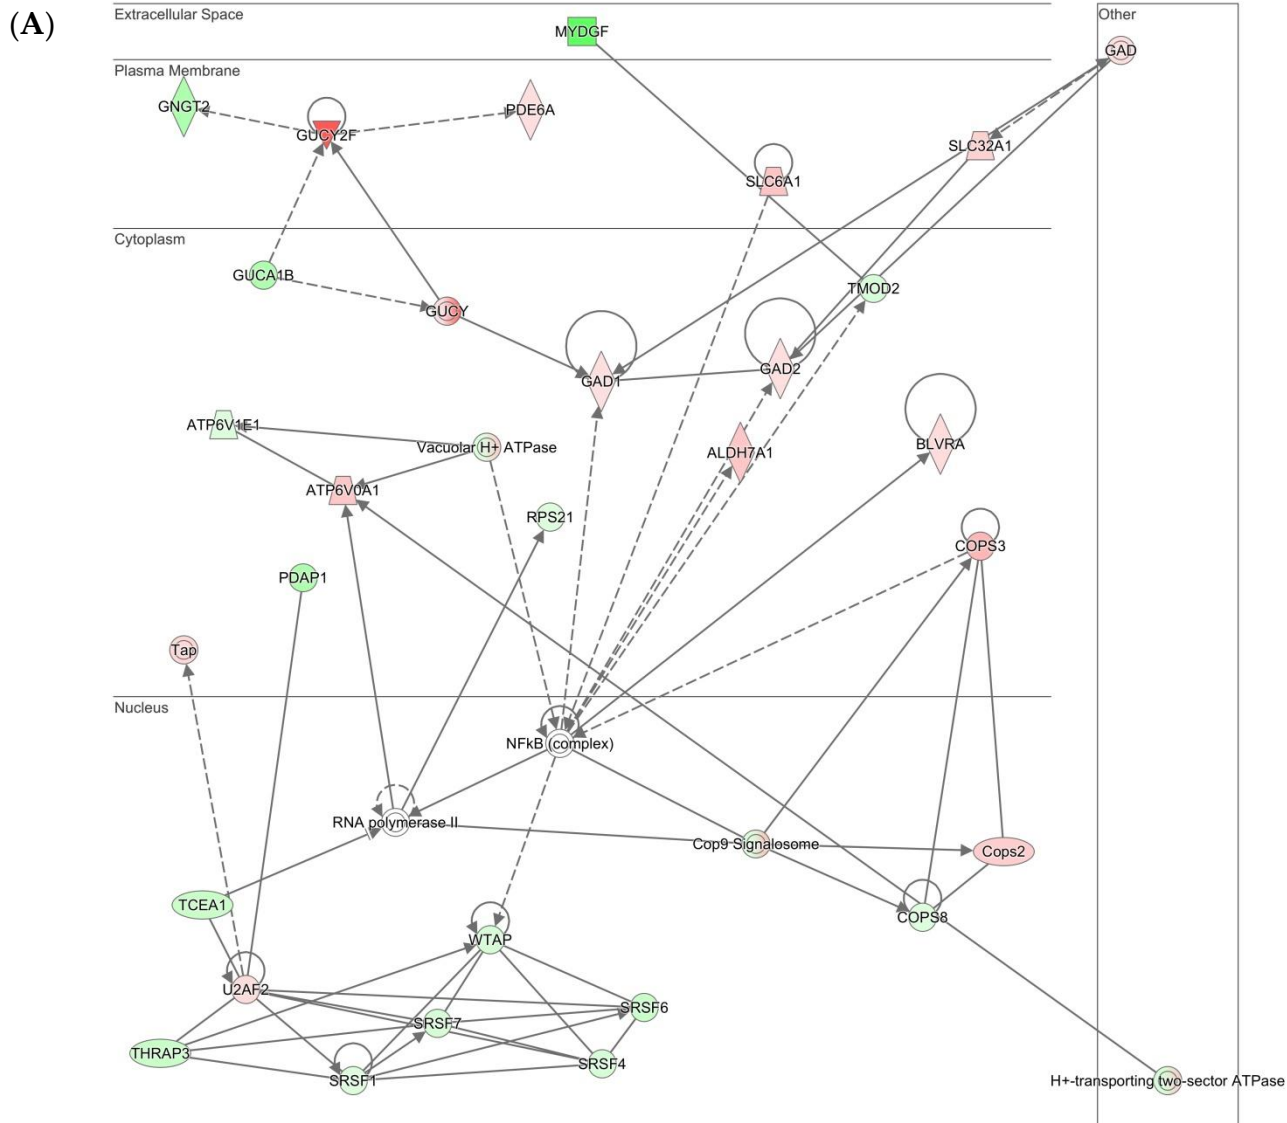

(B)

| Canonical pathway          | Targets                                                                           | Z-score | p-value  |
|----------------------------|-----------------------------------------------------------------------------------|---------|----------|
| Sirtuin signaling pathway  | H <sup>+</sup> -transporting two-sector ATPase, NFkB (complex), RNA polymerase II | -0.3    | 3.26E-07 |
| GABA receptor signaling    | GAD1, AD2, GAD, GUCY, GUCY2F, SLC32A1, SLC6A1                                     | N/A     | 1.04E-05 |
| Protein kinase A signaling | NFkB (complex), PDE6A                                                             | 2.3     | 6.03E-03 |

**Figure S2.** IPA<sup>®</sup> network linked to molecular transport, RNA posttranscriptional modification, RNA trafficking (A). The network was assembled from E<sub>2</sub>-regulated proteins in the retina of OVX Brown Norway rats through identification by label-free shotgun proteomics. In the network, red and green colors denote upregulation and downregulation in response to E<sub>2</sub> treatment, respectively. The intensity of color indicates the relative magnitude of fold change in the protein's expression pattern. Solid and dashed lines represent direct and indirect interactions, respectively. For further details on symbols and relationships, see [http://qiagen.force.com/KnowledgeBase/articles/Basic\\_Technical\\_Q\\_A/Legend](http://qiagen.force.com/KnowledgeBase/articles/Basic_Technical_Q_A/Legend). Inset table (B): Top canonical pathways and their corresponding molecular targets associated with the network shown. Z-scores indicate activation or suppression of the corresponding pathway (positive or negative values, respectively; N/A: no prediction can be made).

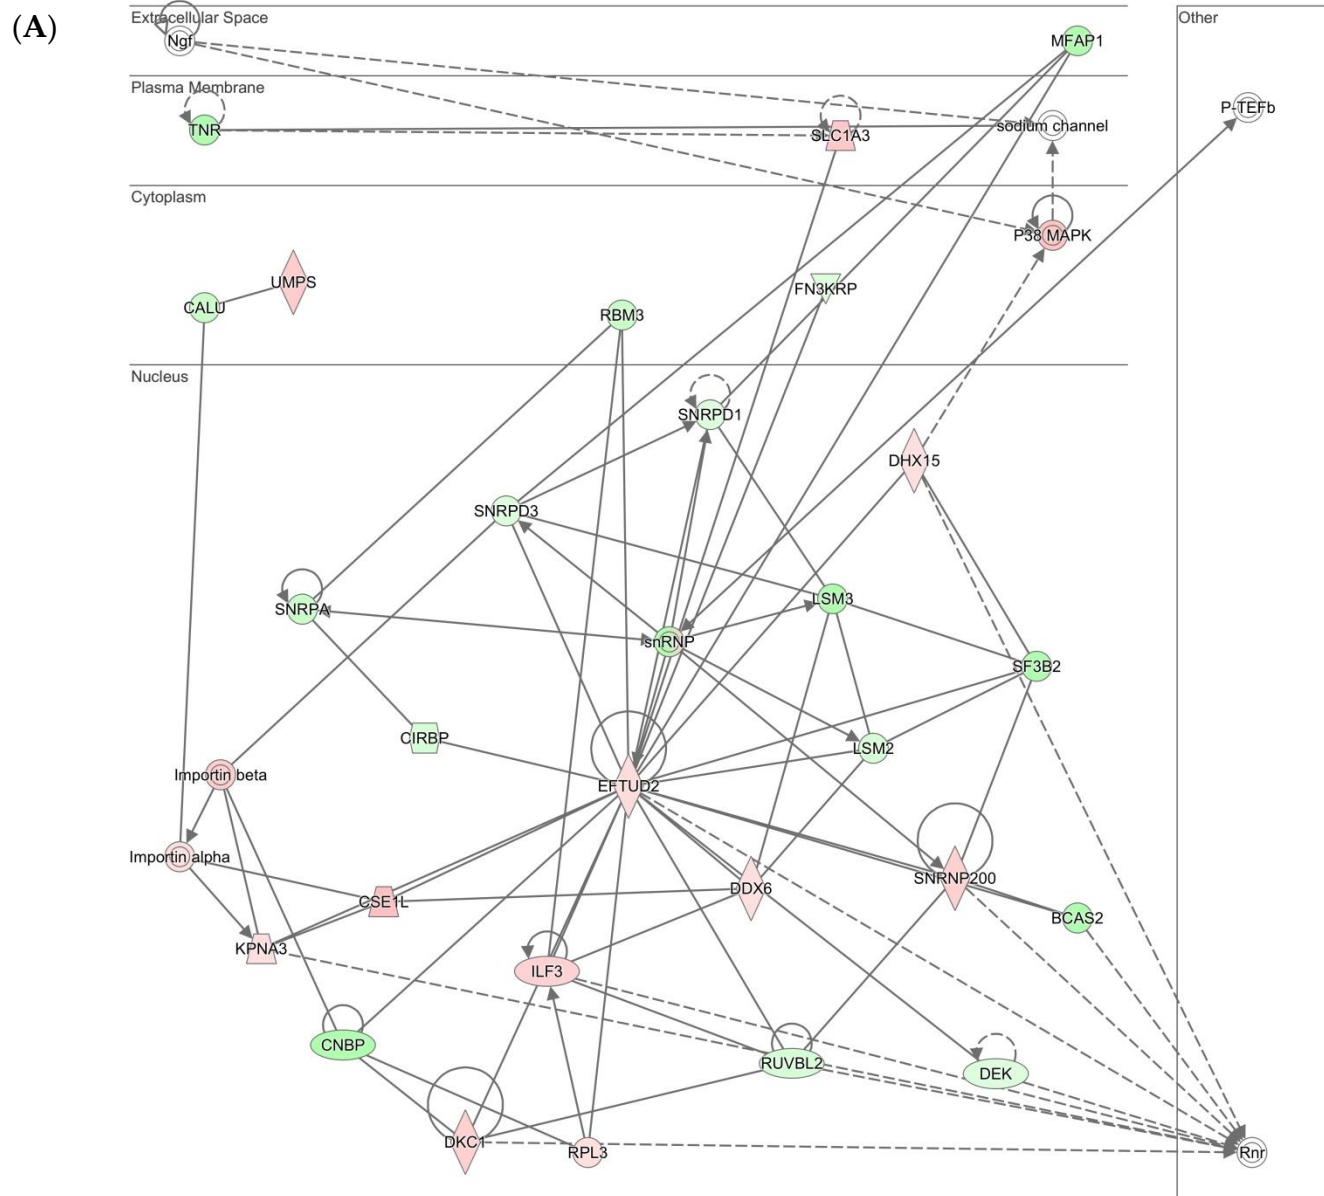

(B)

| Canonical pathway         | Targets                                     | Z-score | p-value  |
|---------------------------|---------------------------------------------|---------|----------|
| EIF2 signaling            | P38 MAPK, Rnr, RPL3                         | 1.3     | 1.78E-02 |
| Axonal guidance signaling | Ngf, P38 MAPK                               | N/A     | 1.76E-01 |
| RAN signaling             | CSE1L, Importin alpha, Importin beta, KPNA3 | N/A     | 9.08E-05 |

**Figure S3.** IPA<sup>®</sup> network linked to infectious disease, organismal injury and abnormalities, RNA post- transcriptional modification (A). The network was assembled from E<sub>2</sub>-regulated proteins in the retina of OVX rats through identification by label-free shotgun proteomics. In the network, red and green colors denote upregulation and downregulation in response to E<sub>2</sub> treatment, respectively. The intensity of color indicates the relative magnitude of fold change in the protein's expression pattern. Solid and dashed lines represent direct and indirect interactions, respectively. For further details on symbols and relationships, see [http://qiagen.force.com/KnowledgeBase/articles/Basic\\_Technical\\_Q\\_A/Legend](http://qiagen.force.com/KnowledgeBase/articles/Basic_Technical_Q_A/Legend). Inset table (B): Top canonical pathways and their corresponding molecular targets associated with the network shown. Z-scores indicate activation or suppression of the corresponding pathway (positive or negative values, respectively; N/A: no prediction can be made).

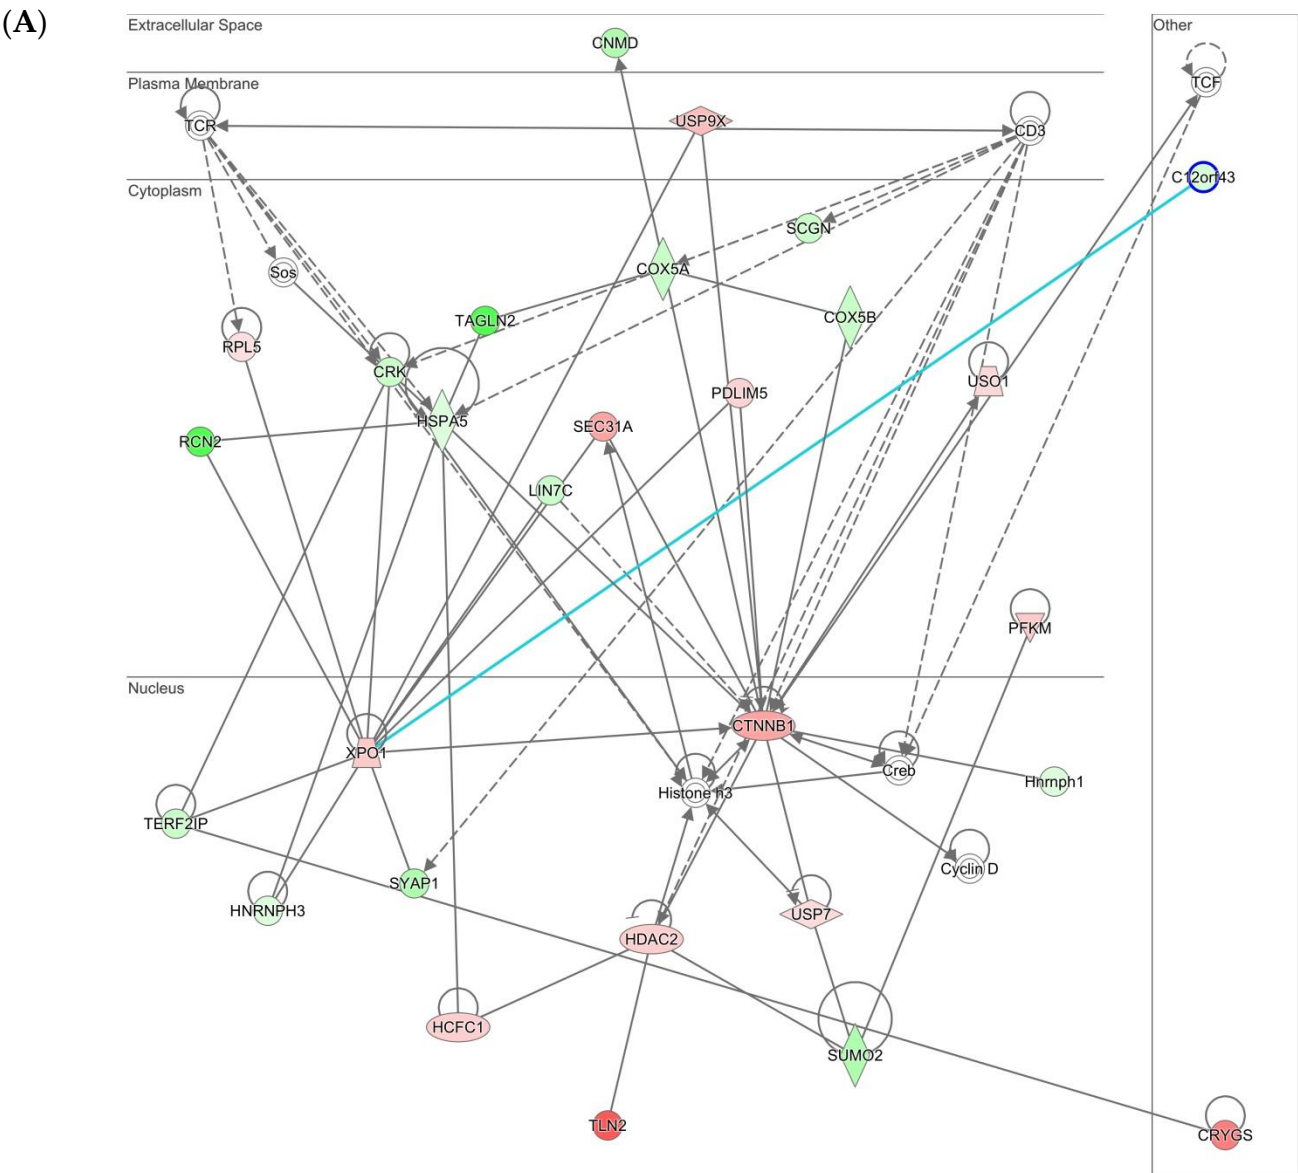

(B)

| Canonical pathway                 | Targets                                | Z-score | p-value  |
|-----------------------------------|----------------------------------------|---------|----------|
| Glucocorticoid receptor signaling | CD3, Creb, Histone h3, HSPA5, Sos, TCR | N/A     |          |
| Synaptogenesis pathway            | Creb, CRK, CTNNB1, Sos                 | 1.1     | 2.20E-04 |
| ERK/MAPK signaling                | Creb, CRK, Histone h3, Sos, TLN2       | 1.8     | 2.40E-02 |

**Figure S4.** IPA<sup>®</sup> network linked to cancer, infectious disease, organismal injury and abnormalities (A). The network was assembled from E<sub>2</sub>-regulated proteins in the retina of OVX rats through identification by label-free shotgun proteomics. In the network, red and green colors denote upregulation and downregulation in response to E<sub>2</sub> treatment, respectively. The intensity of color indicates the relative magnitude of fold change in the protein's expression pattern. Solid and dashed lines represent direct and indirect interactions, respectively. For further details on symbols and relationships, see [http://qiagen.force.com/KnowledgeBase/articles/Basic\\_Technical\\_Q\\_A/Legend](http://qiagen.force.com/KnowledgeBase/articles/Basic_Technical_Q_A/Legend). Inset table (B): Top canonical pathways and their corresponding molecular targets associated with the network shown. Z-scores indicate activation or suppression of the corresponding pathway (positive or negative values, respectively; N/A: no prediction can be made).



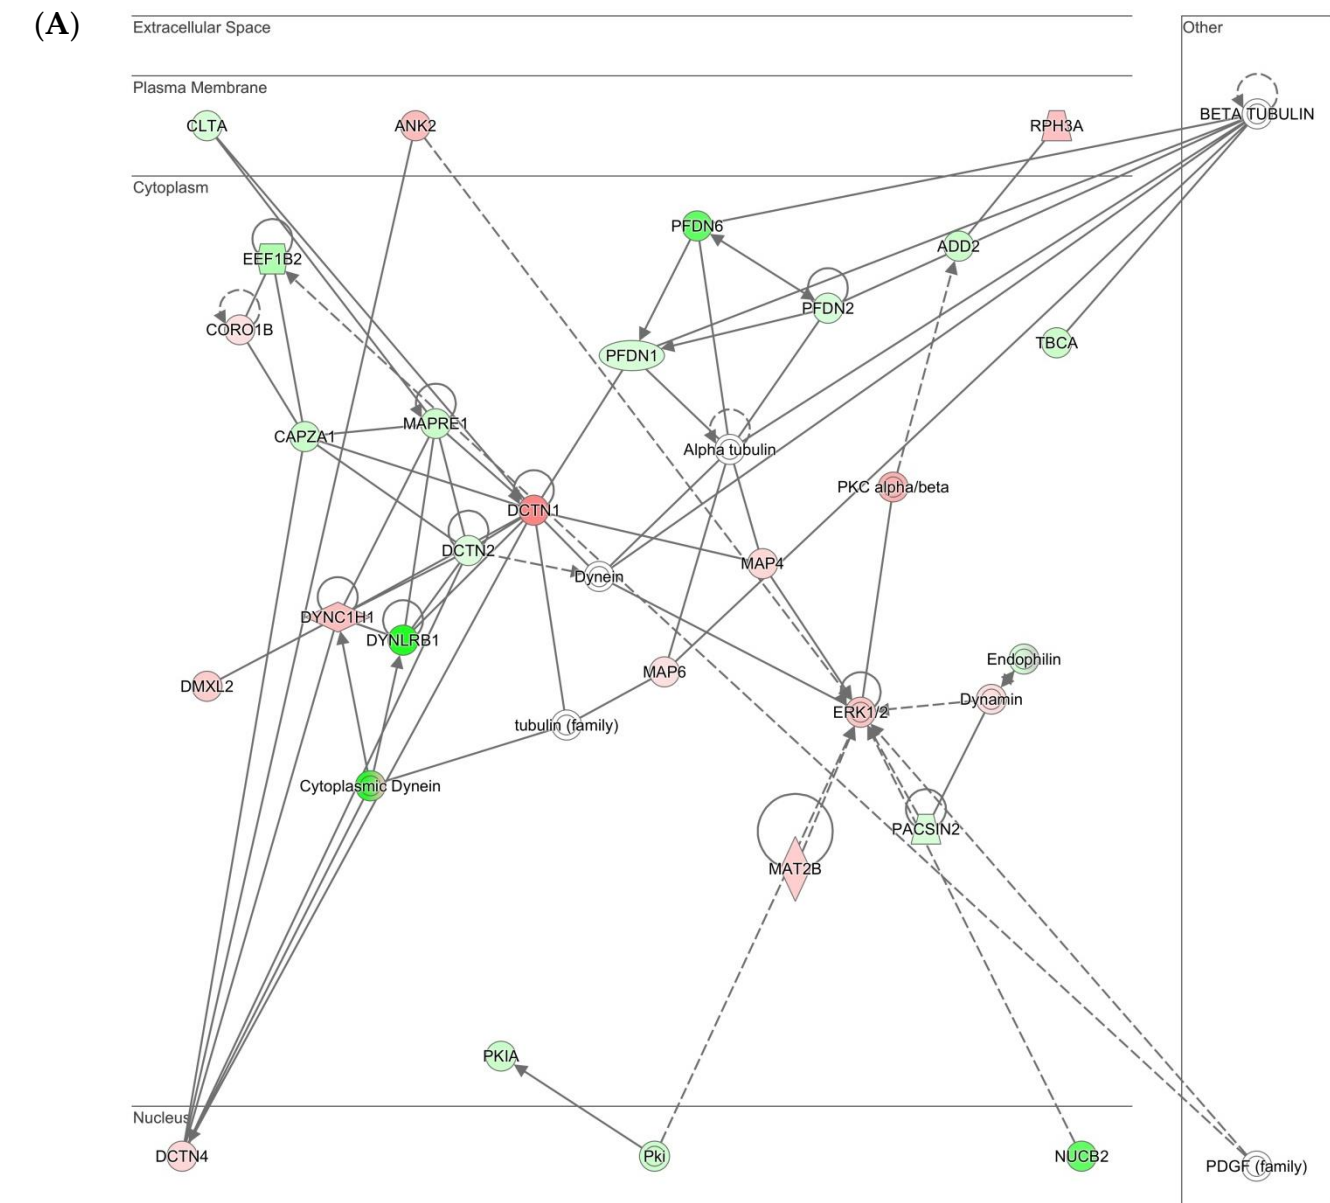

(B)

| Canonical pathway             | Targets                                  | Z-score | p-value  |
|-------------------------------|------------------------------------------|---------|----------|
| Clathrin-mediated endocytosis | CLTA, Dynamin, Endophilin, PDGF (family) | N/A     | 4.14E-09 |
| Sirtuin signaling pathway     | Alpha tubulin, ERK1/2, tubulin (family)  | -0.3    | 3.26E-07 |

**Figure S5.** IPA<sup>®</sup> network linked to cellular assembly and organization, cellular function and maintenance, connective tissue disorder (A). The network was assembled from E<sub>2</sub>-regulated proteins in the retina of OVX rats through identification by label-free shotgun proteomics. In the network, red and green colors denote upregulation and downregulation in response to E<sub>2</sub> treatment, respectively. The intensity of color indicates the relative magnitude of fold change in the protein's expression pattern. Solid and dashed lines represent direct and indirect interactions, respectively. For further details on symbols and relationships, see [http://qiagen.force.com/KnowledgeBase/articles/Basic Technical Q A/Legend](http://qiagen.force.com/KnowledgeBase/articles/Basic+Technical+Q+A/Legend). Inset table (B): Top canonical pathways and their corresponding molecular targets associated with the network shown. Z-scores indicate activation or suppression of the corresponding pathway (positive or negative values, respectively; N/A: no prediction can be made).

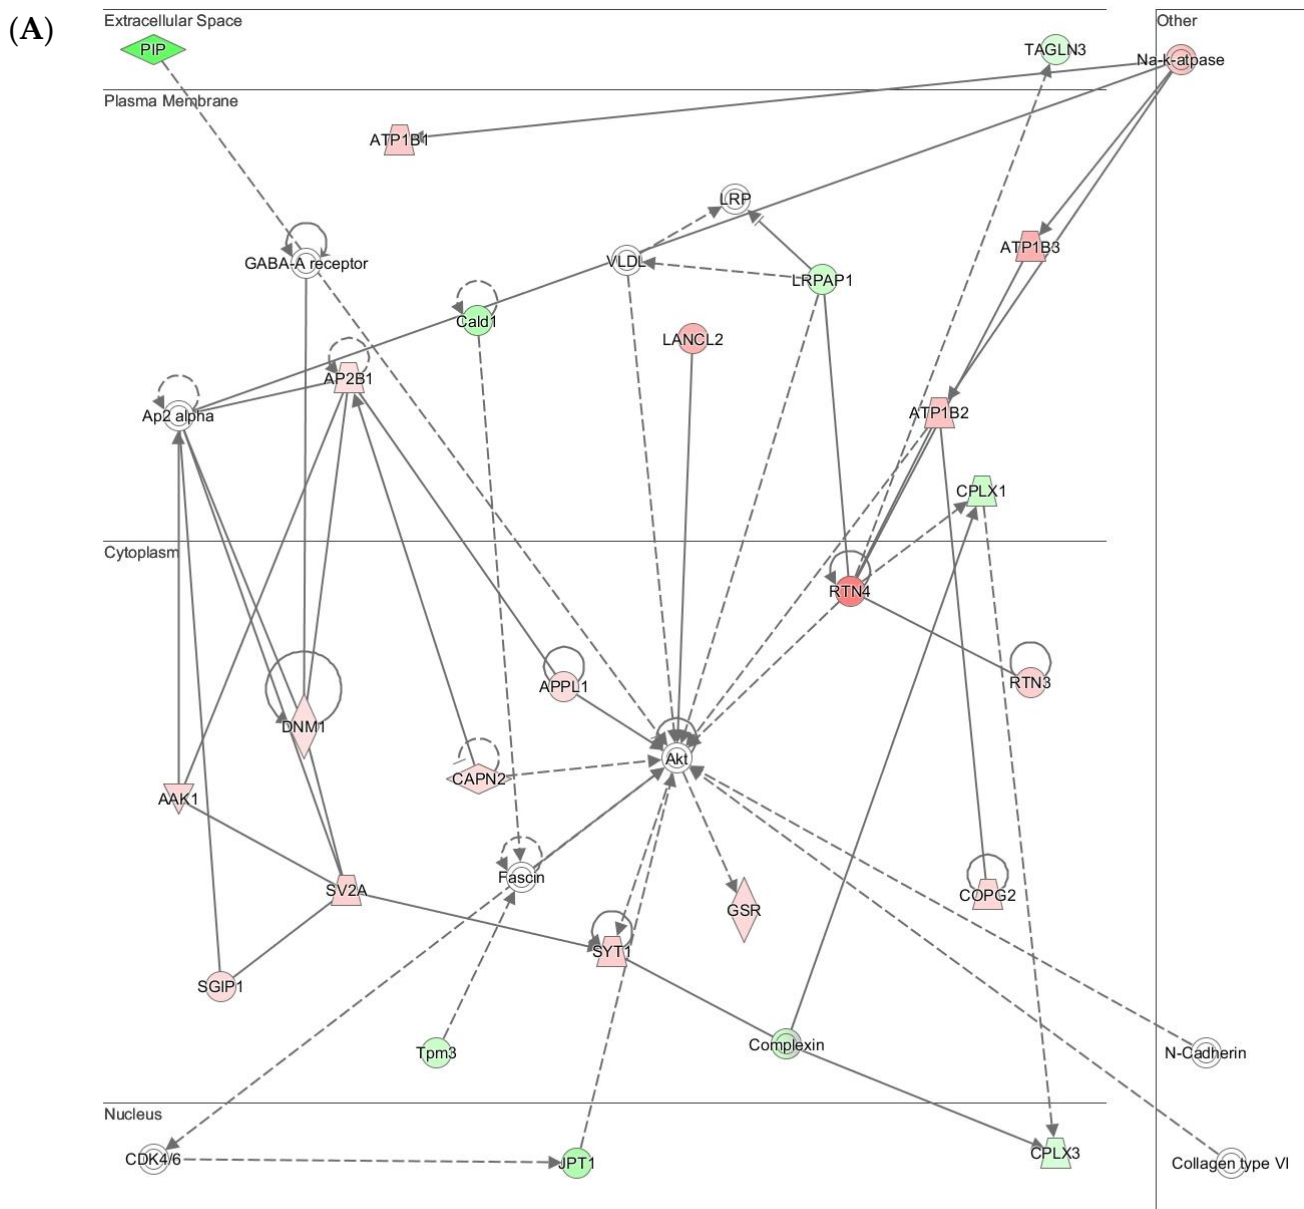

(B)

| Canonical pathway             | Targets                                                               | Z-score | p-value  |
|-------------------------------|-----------------------------------------------------------------------|---------|----------|
| Clathrin-mediated endocytosis | AAK1, Ap2 alpha, AP2B1, DNM1                                          | N/A     | 4.14E-09 |
| Synaptogenesis pathway        | Akt, Ap2 alpha, AP2B1, COMPLEXIN, CPLX1, CPLX3, LRP, N-Cadherin, SYT1 | 1.1     | 2.20E-04 |
| Wnt/Beta catenin signaling    | Akt, APPL1, LRP, N-cadherin                                           |         |          |

**Figure S6.** IPA<sup>®</sup> network linked to cell to cell signaling and interaction, cellular function and maintenance, nervous system development and function (A). The network was assembled from E<sub>2</sub>-regulated proteins in the retina of OVX rats through identification by label-free shotgun proteomics. In the network, red and green colors denote upregulation and downregulation in response to E<sub>2</sub> treatment, respectively. The intensity of color indicates the relative magnitude of fold change in the protein's expression pattern. Solid and dashed lines represent direct and indirect interactions, respectively. For further details on symbols and relationships, see [http://qiagen.force.com/KnowledgeBase/articles/Basic\\_Technical\\_Q\\_A/Legend](http://qiagen.force.com/KnowledgeBase/articles/Basic_Technical_Q_A/Legend). Inset table (B): Top canonical pathways and their corresponding molecular targets associated with the network shown. Z-scores indicate activation or suppression of the corresponding pathway (positive or negative values, respectively; N/A: no prediction can be made).

(A)

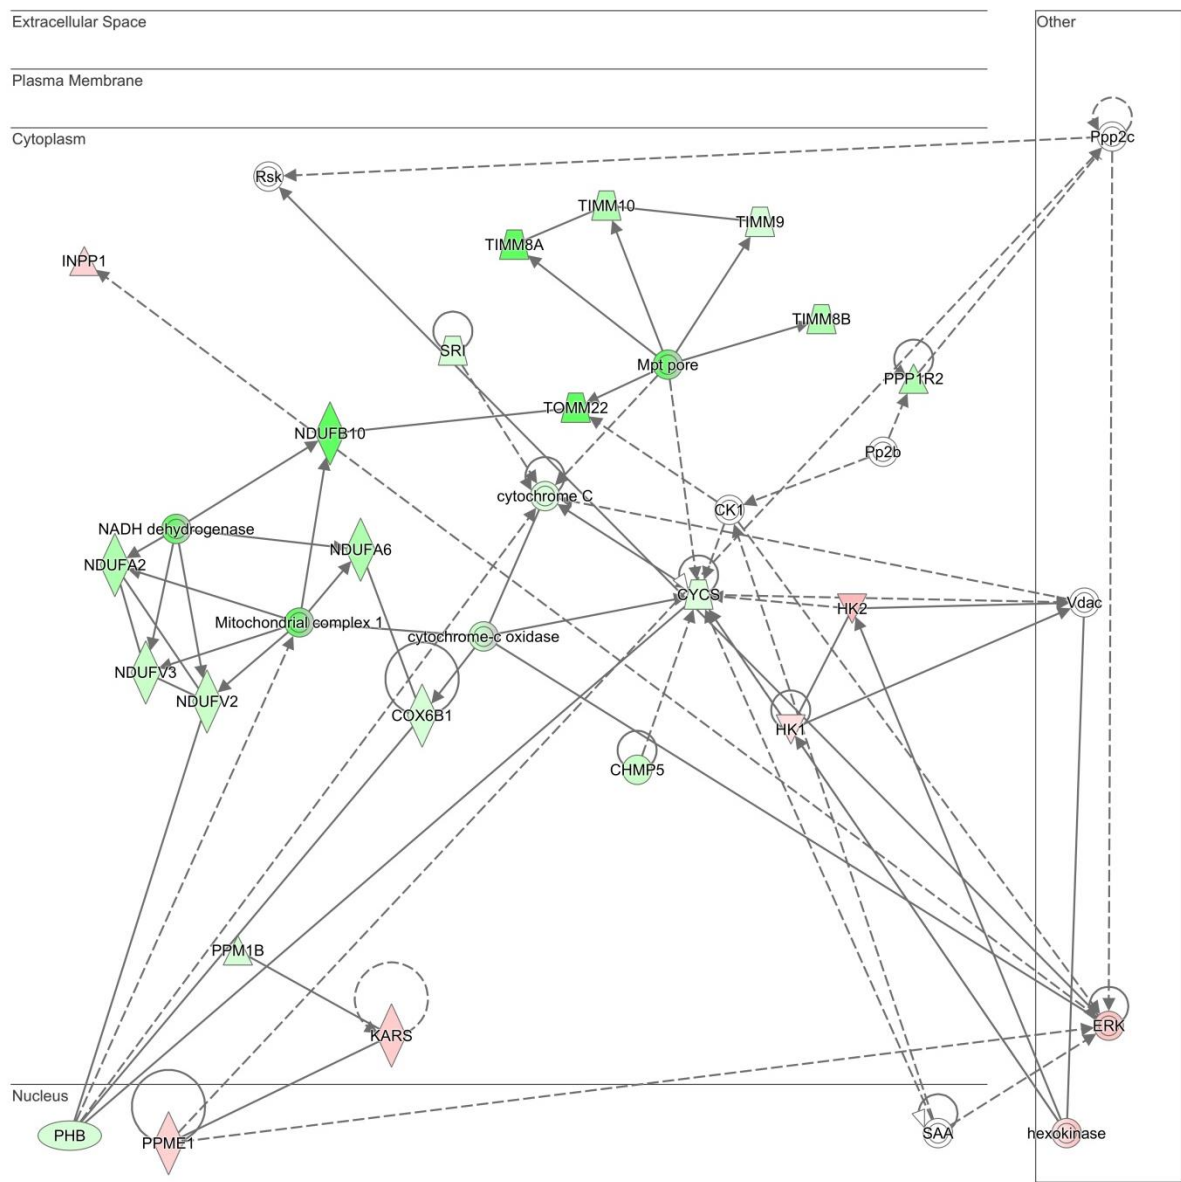

(B)

| Canonical pathway         | Targets                                                                                                                                                        | Z-score | p-value  |
|---------------------------|----------------------------------------------------------------------------------------------------------------------------------------------------------------|---------|----------|
| Sirtuin signaling pathway | cytochrome C, ERK, Mitochondrial complex 1, Mpt pore, NADH dehydrogenase, NDUFA2, NDUFA6, NDUFB10, NDUFV2, NDUFV3, TIMM9, TIMM10, TIMM8A, TIMM8B, TOMM22, Vdac | -0.3    | 3.26E-07 |
| Oxidative phosphorylation | COX6B1, CYCS, cytochrome C, cytochrome-c oxidase, Mitochondrial complex1, NADH dehydrogenase, NDUFA2, NDUFA6, NDUFB10, NDUFV2, NDUFV3                          | -3.6    | 7.03E-09 |
| ERK/MAPK signaling        | ERK, Ppp2c, Rsk                                                                                                                                                | 1.8     | 2.40E-02 |

**Figure S7.** IPA<sup>®</sup> network linked to carbohydrate metabolism, cellular compromise, cellular function and maintenance (A). The network was assembled from E<sub>2</sub>-regulated proteins in the retina of OVX rats through identification by label-free shotgun proteomics. In the network, red and green colors denote upregulation and downregulation in response to E<sub>2</sub> treatment, respectively. The intensity of color indicates the relative magnitude of fold change in the protein's expression pattern. Solid and dashed lines represent direct and indirect interactions, respectively. For further details on symbols and relationships, see [http://qiagen.force.com/KnowledgeBase/articles/Basic\\_Technical\\_Q\\_A/Legend](http://qiagen.force.com/KnowledgeBase/articles/Basic_Technical_Q_A/Legend). Inset table (B): Top canonical pathways and their corresponding molecular targets associated with the network shown. Z-scores indicate activation or suppression of the corresponding pathway (positive or negative values, respectively).

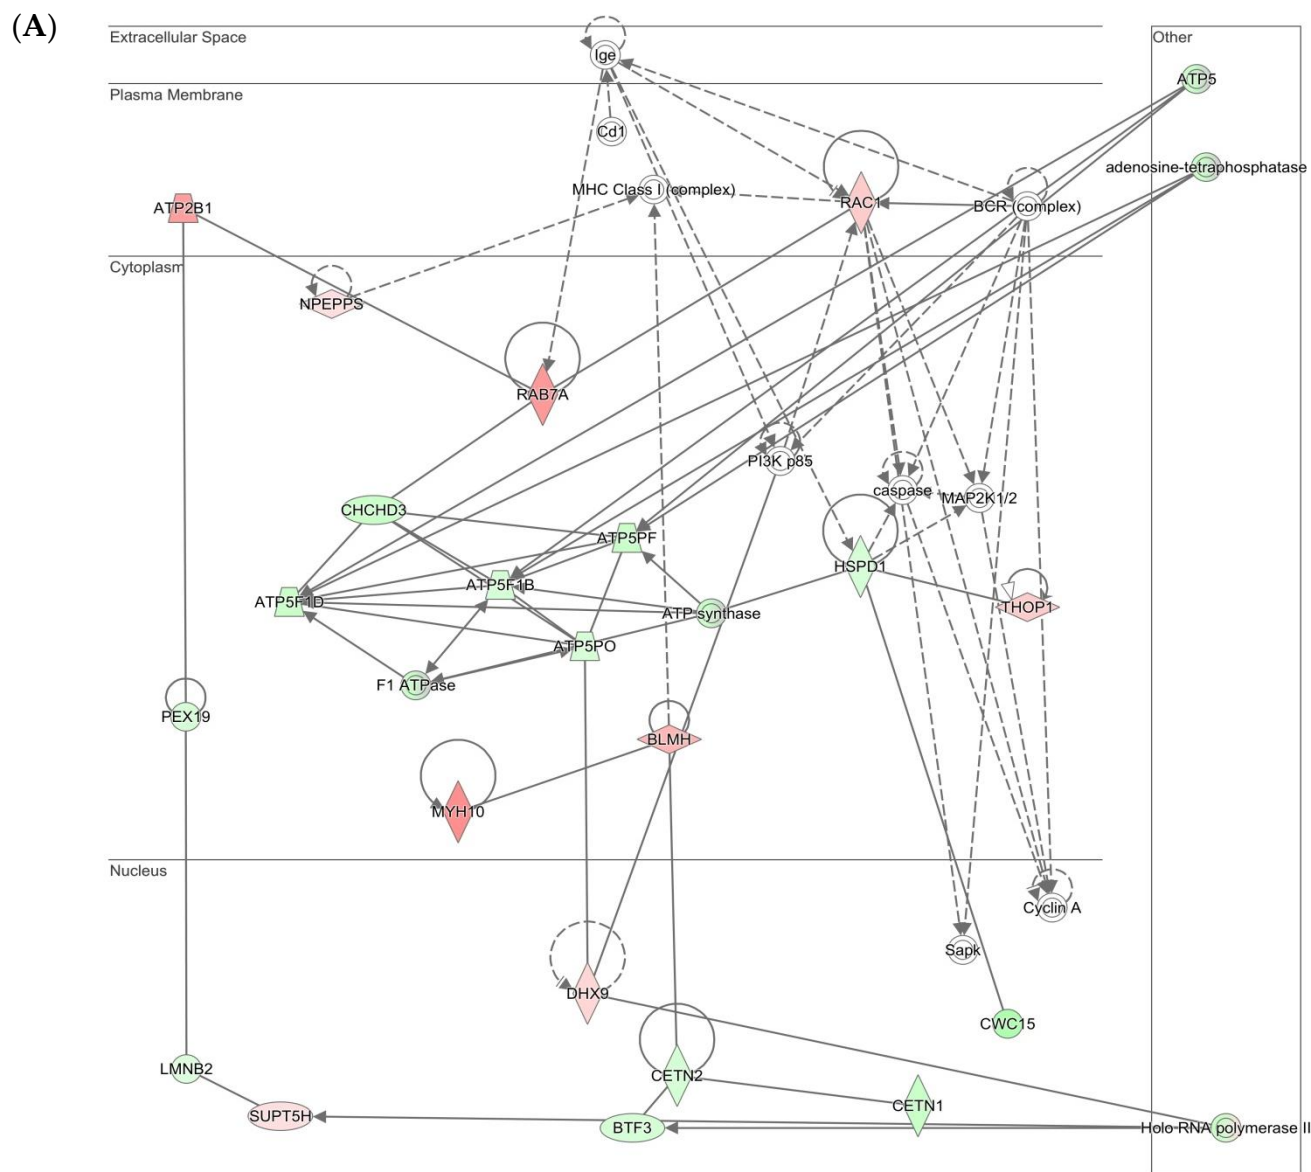

(B)

| Canonical pathway         | Targets                                                                                                  | Z-score | p-value  |
|---------------------------|----------------------------------------------------------------------------------------------------------|---------|----------|
| Sirtuin signaling pathway | Adenosine-tetraphosphatase, ATP5, ATP synthase, ATP5F1B, ATP5F1D, ATP5PF, F1 ATPase, Holo RNA pol2, Sapk | -0.3    | 3.26E-07 |
| Oxidative phosphorylation | Adenosine-tetraphosphatase, ATP5, ATP synthase, ATP5F1B, ATP5F1D, ATP5PF, ATP5PO, F1 ATPase              | -3.6    | 7.03E-09 |
| Mitochondrial dysfunction | Adenosine-tetraphosphatase, ATP5, ATP synthase, ATP5F1B, ATP5F1D, ATP5PF, F1 ATPase, caspase, Sapk       | N/A     | 2.29E-07 |

**Figure S8.** IPA<sup>®</sup> network linked to cellular assembly and organization, energy production, nucleic acid metabolism (A). The network was assembled from E<sub>2</sub>-regulated proteins in the retina of OVX rats through identification by label-free shotgun proteomics. In the network, red and green colors denote upregulation and downregulation in response to E<sub>2</sub> treatment, respectively. The intensity of color indicates the relative magnitude of fold change in the protein's expression pattern. Solid and dashed lines represent direct and indirect interactions, respectively. For further details on symbols and relationships, see [http://qiagen.force.com/KnowledgeBase/articles/Basic\\_Technical\\_Q\\_A/Legend](http://qiagen.force.com/KnowledgeBase/articles/Basic_Technical_Q_A/Legend). Inset table (B): Top canonical pathways and their corresponding molecular targets associated with the network shown. Z-scores indicate activation or suppression of the corresponding pathway (positive or negative values, respectively).





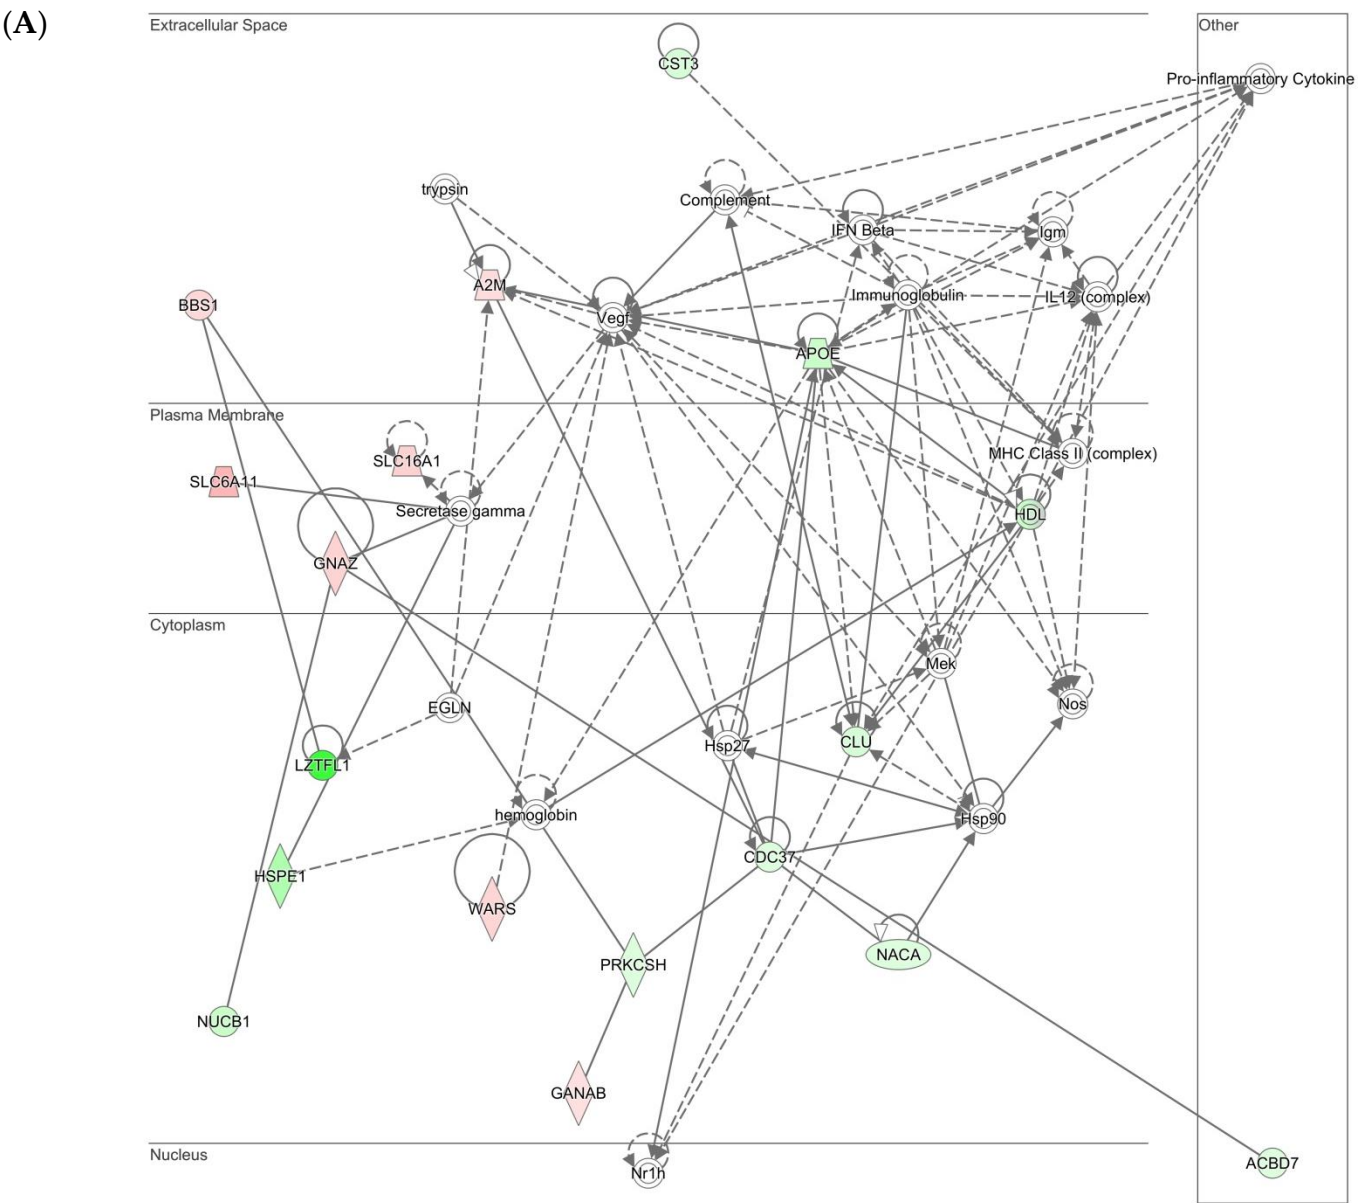

**(B)**

| Canonical pathway              | Targets                                                      | Z-score | p-value  |
|--------------------------------|--------------------------------------------------------------|---------|----------|
| Clathrin-mediated endocytosis  | APOE, CLU, HDL, Vegf                                         | N/A     | 4.14E-09 |
| Protein ubiquitination pathway | Hsp27, Hsp90, HSPE1, MHC class II, Pro-inflammatory cytokine | N/A     | 2.86E-06 |
| Sirtuin signaling pathway      | Nos, Nr1h, Pro-inflammatory cytokine                         | -0.3    | 3.26E-07 |

**Figure S10.** IPA<sup>®</sup> network linked to developmental disorder, hereditary disorder, metabolic disease **(A)**. The network was assembled from E<sub>2</sub>-regulated proteins in the retina of OVX rats through identification by label-free shotgun proteomics. In the network, red and green colors denote upregulation and downregulation in response to E<sub>2</sub> treatment, respectively. The intensity of color indicates the relative magnitude of fold change in the protein's expression pattern. Solid and dashed lines represent direct and indirect interactions, respectively. For further details on symbols and relationships, see [http://qiagen.force.com/KnowledgeBase/articles/Basic\\_Technical\\_Q\\_A/Legend](http://qiagen.force.com/KnowledgeBase/articles/Basic_Technical_Q_A/Legend). Inset table **(B)**: Top canonical pathways and their corresponding molecular targets associated with the network shown. Z-scores indicate activation or suppression of the corresponding pathway (positive or negative values, respectively; N/A: no prediction can be made).

(A)

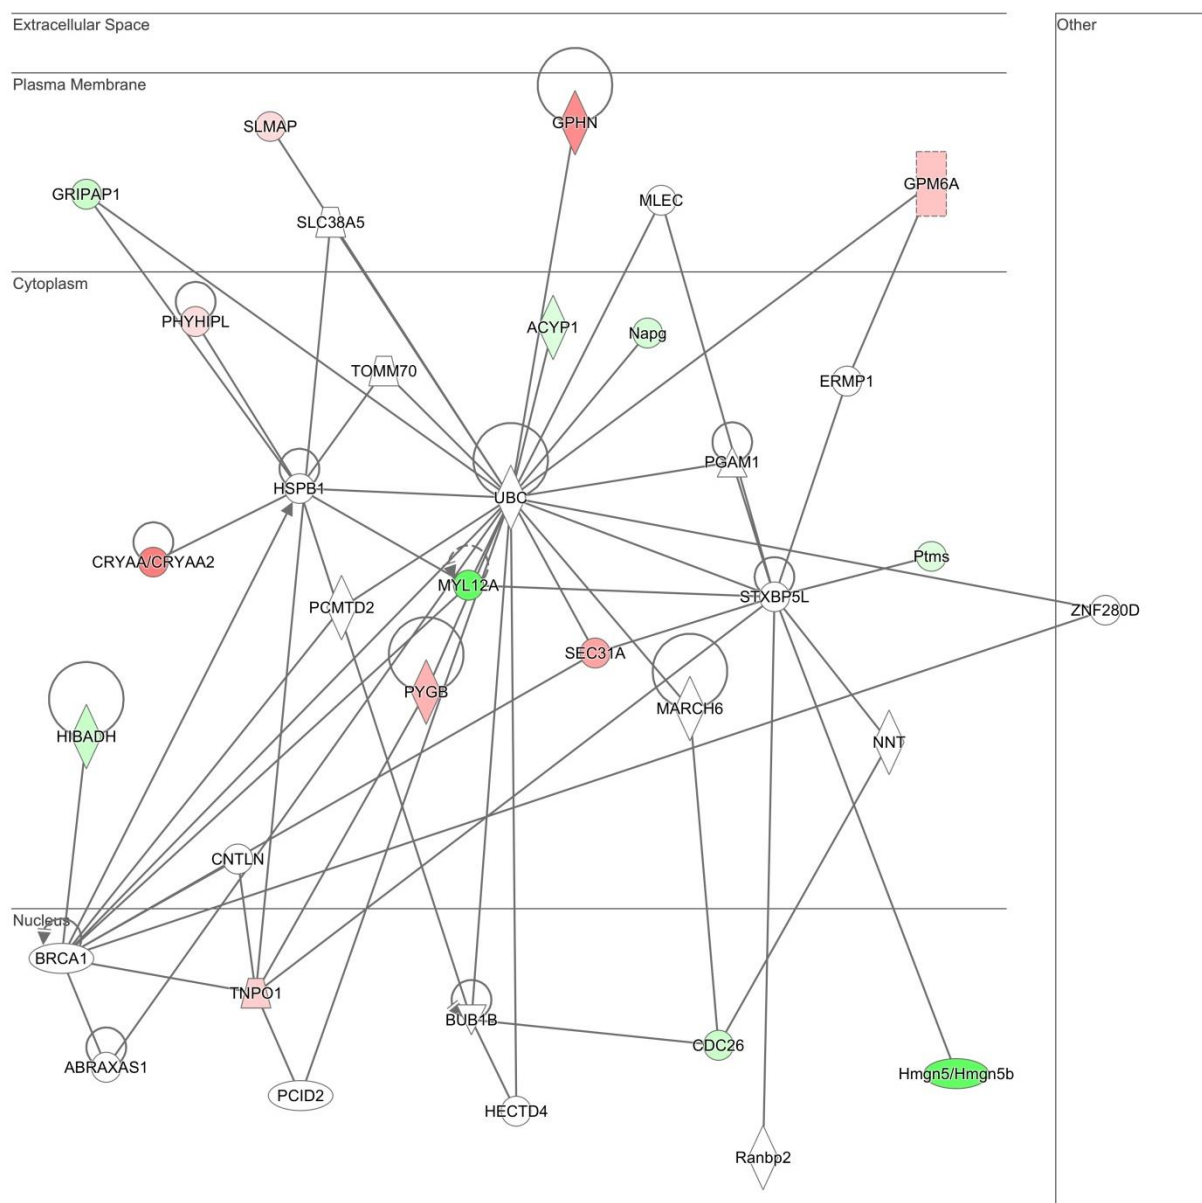

(B)

| Canonical pathway              | Targets                         | Z-score | p-value  |
|--------------------------------|---------------------------------|---------|----------|
| Protein ubiquitination pathway | BRCA1, CRYAA/CRYAA2, HSPB1, UBC | N/A     | 2.86E-06 |
| Sirtuin signaling pathway      | PGAM1, TOMM70                   | -0.3    | 3.26E-07 |
| Protein kinase A signaling     | CDC26, MYL12A, PYGB             | 2.3     | 6.03E-03 |

**Figure S11.** IPA<sup>®</sup> network linked to gene expression, RNA damage and repair, RNA post transcriptional modification (A). The network was assembled from E<sub>2</sub>-regulated proteins in the retina of OVX rats through identification by label-free shotgun proteomics. In the network, red and green colors denote upregulation and downregulation in response to E<sub>2</sub> treatment, respectively. The intensity of color indicates the relative magnitude of fold change in the protein's expression pattern. Solid and dashed lines represent direct and indirect interactions, respectively. For further details on symbols and relationships, see [http://qiagen.force.com/KnowledgeBase/articles/Basic\\_Technical\\_Q\\_A/Legend](http://qiagen.force.com/KnowledgeBase/articles/Basic_Technical_Q_A/Legend). Inset table (B): Top canonical pathways and their corresponding molecular targets associated with the network shown. Z-scores indicate activation or suppression of the corresponding pathway (positive or negative values, respectively; N/A: no prediction can be made).

(A)

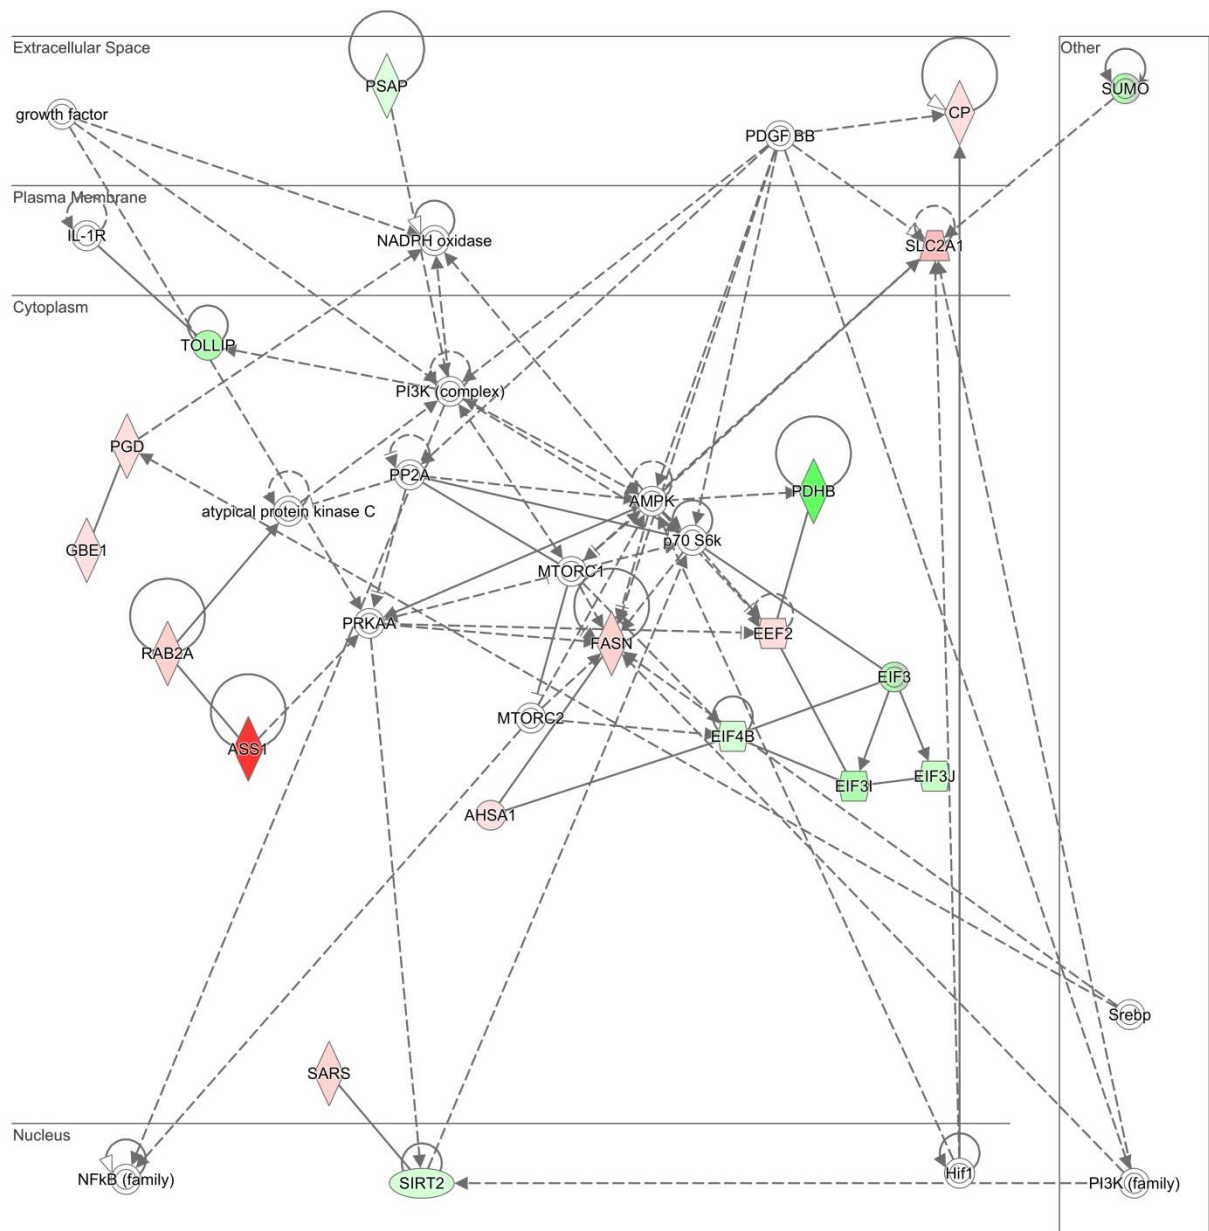

(B)

| Canonical pathway         | Targets                                                                                                                                    | Z-score | p-value  |
|---------------------------|--------------------------------------------------------------------------------------------------------------------------------------------|---------|----------|
| mTOR signaling            | AMPK, Atypical protein kinase C, EIF3, EIF31, EIF3J, EIF4B, Growth factor, Hif1, MTORC1, MTORC2, p70 S6k, PI3K, PI3K (family), PP2A, PRKAA | 1.3     | 1.25E-02 |
| Sirtuin signaling pathway | AMPK, Hif1, MtorC1, Mtor C2, NFkB, PRKAA, SIRT2, SLC2A1, Srebp                                                                             | -0.3    | 3.26E-07 |
| AMPK pathway              | AMPK, EIF2, FASN, MTORC1, MTORC2, p70 S6k, PI3K, P13K (family), PP2A, PRKAA, RAB2A, SLC2A1                                                 | 1.9     | 3.09E-04 |

**Figure S12.** IPA<sup>®</sup> network linked to nucleic acid metabolism, protein synthesis, small-molecule biochemistry (A). The network was assembled from E<sub>2</sub>-regulated proteins in the retina of OVX rats through identification by label-free shotgun proteomics. In the network, red and green colors denote upregulation and downregulation in response to E<sub>2</sub> treatment, respectively. The intensity of color indicates the relative magnitude of fold change in the protein's expression pattern. Solid and dashed lines represent direct and indirect interactions, respectively. For further details on symbols and relationships, see [http://qiagen.force.com/KnowledgeBase/articles/Basic\\_Technical\\_Q\\_A/Legend](http://qiagen.force.com/KnowledgeBase/articles/Basic_Technical_Q_A/Legend). Inset table (B): Top canonical pathways and their corresponding molecular targets associated with the network shown. Z-scores indicate activation or suppression of the corresponding pathway (positive or negative values, respectively).





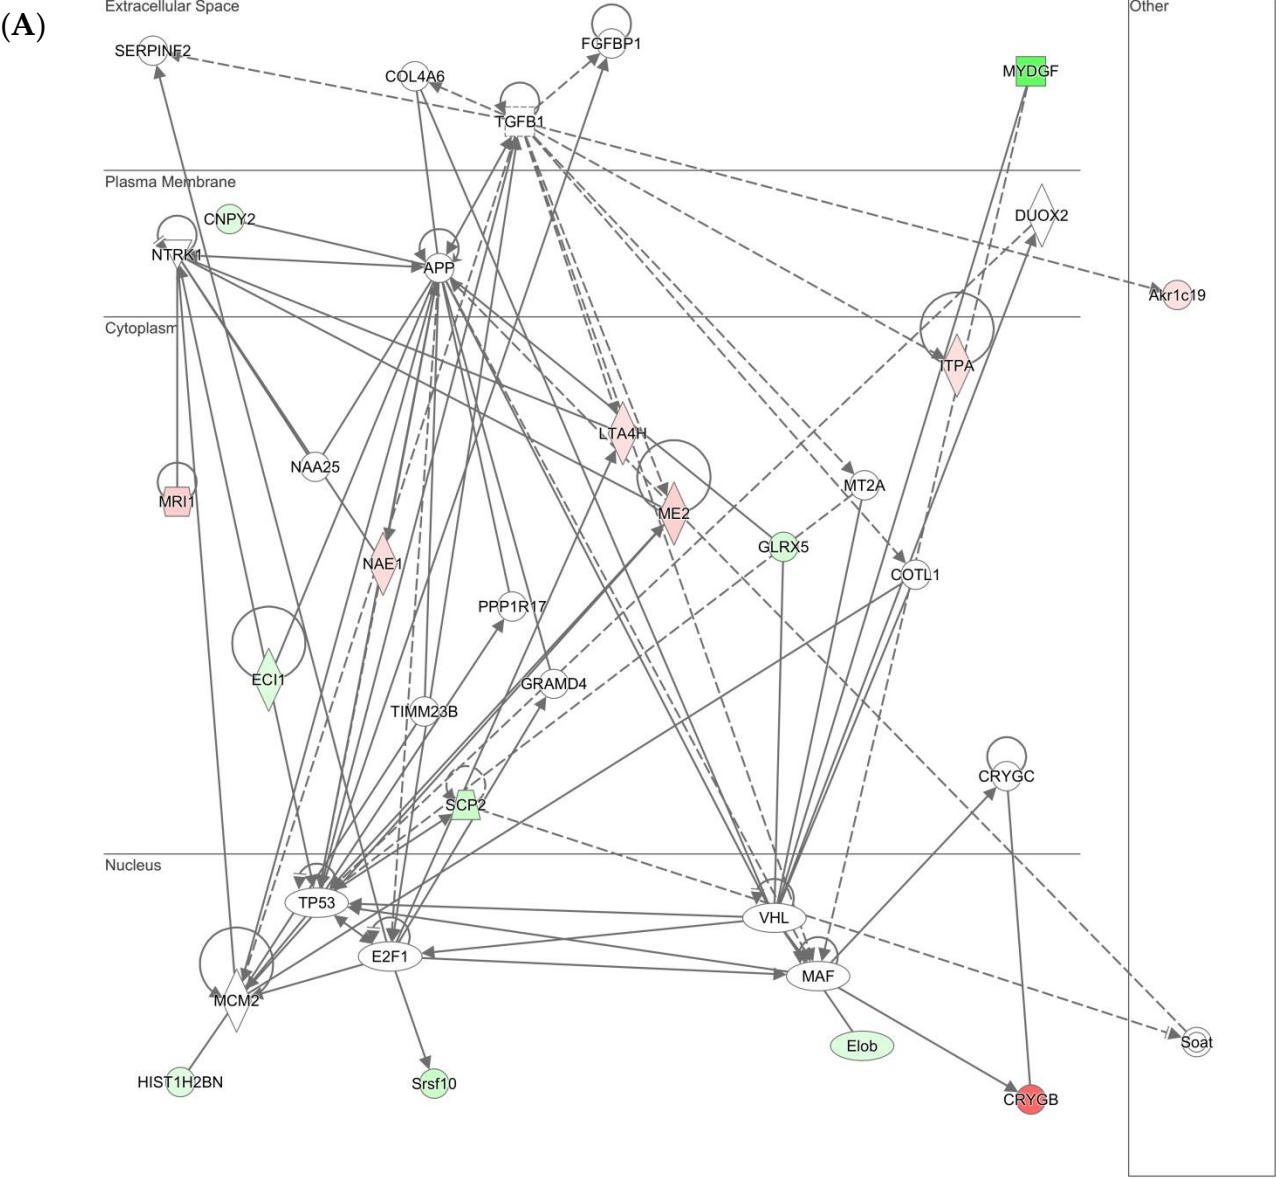

(B)

| Canonical pathway                   | Targets                  | Z-score | p-value  |
|-------------------------------------|--------------------------|---------|----------|
| Sirtuin signaling pathway           | APP, E2F1, TIMM23B, TP53 | -0.3    | 3.26E-07 |
| Aryl hydrocarbon receptor signaling | E2F1, TGFB1, TP53        | N/A     |          |

**Figure S14.** IPA<sup>®</sup> network linked to cell morphology, cellular compromise, cellular function and maintenance (A). The network was assembled from E<sub>2</sub>-regulated proteins in the retina of OVX rats through identification by label-free shotgun proteomics. In the network, red and green colors denote upregulation and downregulation in response to E<sub>2</sub> treatment, respectively. The intensity of color indicates the relative magnitude of fold change in the protein's expression pattern. Solid and dashed lines represent direct and indirect interactions, respectively. For further details on symbols and relationships, see [http://qiagen.force.com/KnowledgeBase/articles/Basic\\_Technical\\_Q\\_A/Legend](http://qiagen.force.com/KnowledgeBase/articles/Basic_Technical_Q_A/Legend). Inset table (B): Top canonical pathways and their corresponding molecular targets associated with the network shown. Z-scores indicate activation or suppression of the corresponding pathway (positive or negative values, respectively; N/A: no prediction can be made).

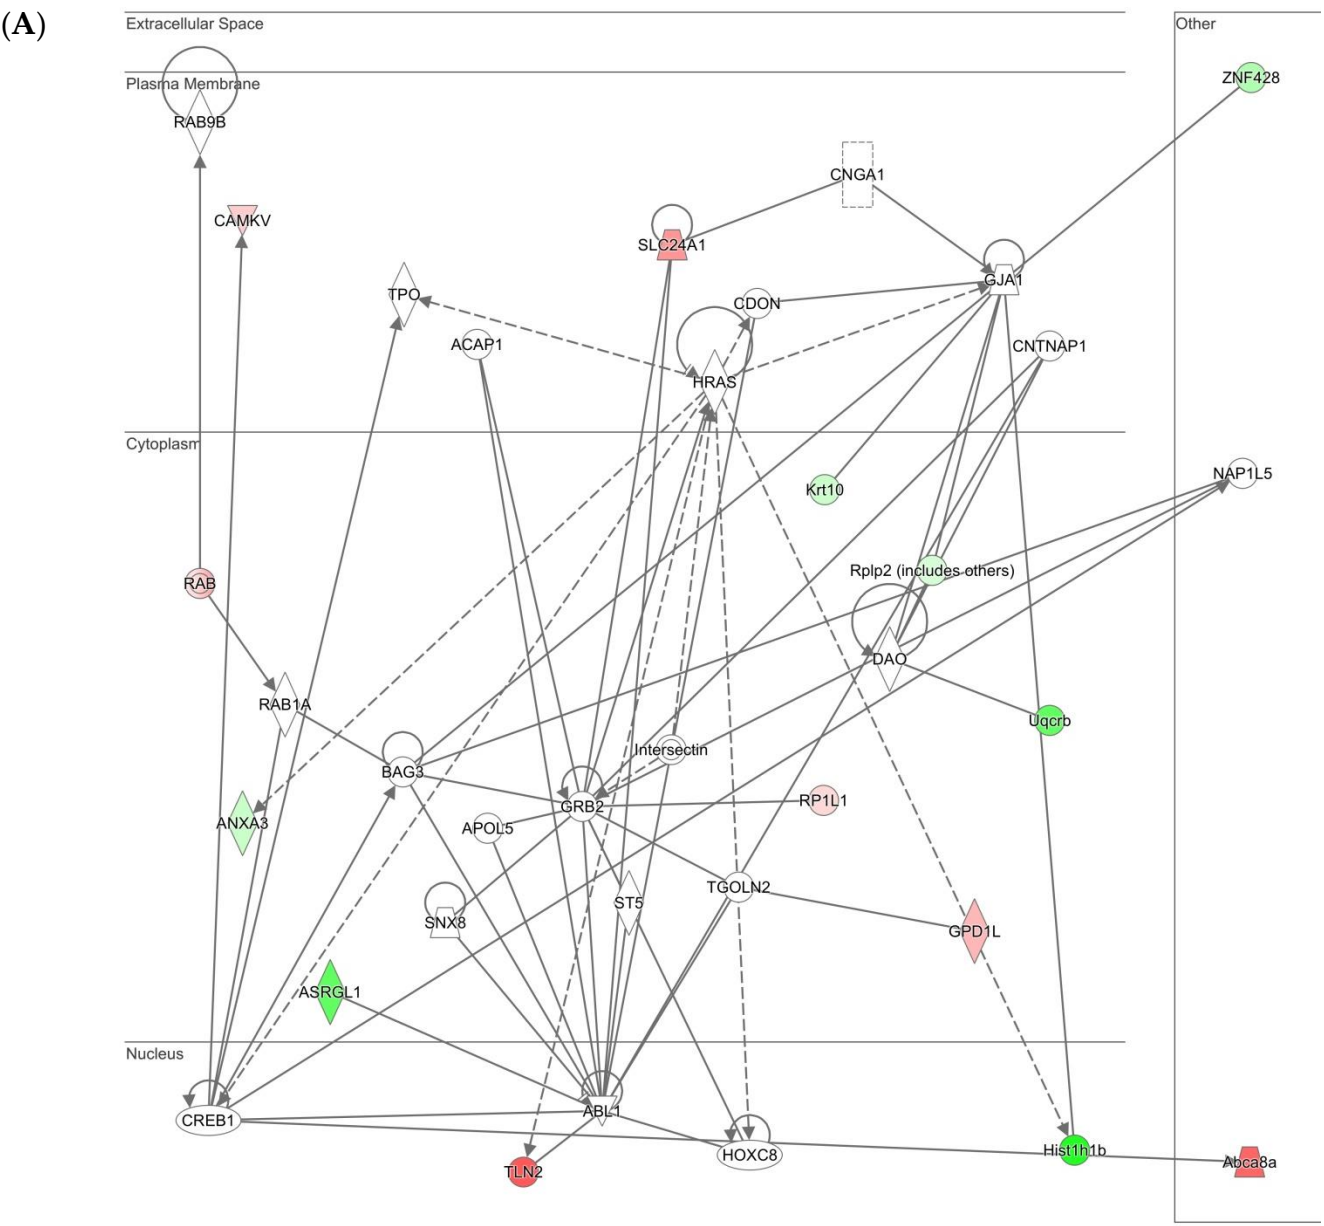

(B)

| Canonical pathway                | Targets                                      | Z-score | p-value  |
|----------------------------------|----------------------------------------------|---------|----------|
| ERK/MAPK signaling               | CREB1, GRB2, HRAS, TLN2                      | 1.8     | 2.40E-2  |
| Axonal guidance signaling        | ALB1, GRB2, HRAS, Intersectin                | N/A     | 1.76E-01 |
| Synaptogenesis signaling pathway | CNTNAP1, CREB1, GRB2, HRAS, Intersectin, RAB | 1.1     | 2.20E-04 |

**Figure S15.** IPA<sup>®</sup> network linked to cancer, cellular growth and proliferation, organismal injury and abnormalities (A). The network was assembled from E<sub>2</sub>-regulated proteins in the retina of OVX rats through identification by label-free shotgun proteomics. In the network, red and green colors denote upregulation and downregulation in response to E<sub>2</sub> treatment, respectively. The intensity of color indicates the relative magnitude of fold change in the protein's expression pattern. Solid and dashed lines represent direct and indirect interactions, respectively. For further details on symbols and relationships, see [http://qiagen.force.com/KnowledgeBase/articles/Basic\\_Technical\\_Q\\_A/Legend](http://qiagen.force.com/KnowledgeBase/articles/Basic_Technical_Q_A/Legend). Inset table (B): Top canonical pathways and their corresponding molecular targets associated with the network shown. Z-scores indicate activation or suppression of the corresponding pathway (positive or negative values, respectively; N/A: no prediction can be made).

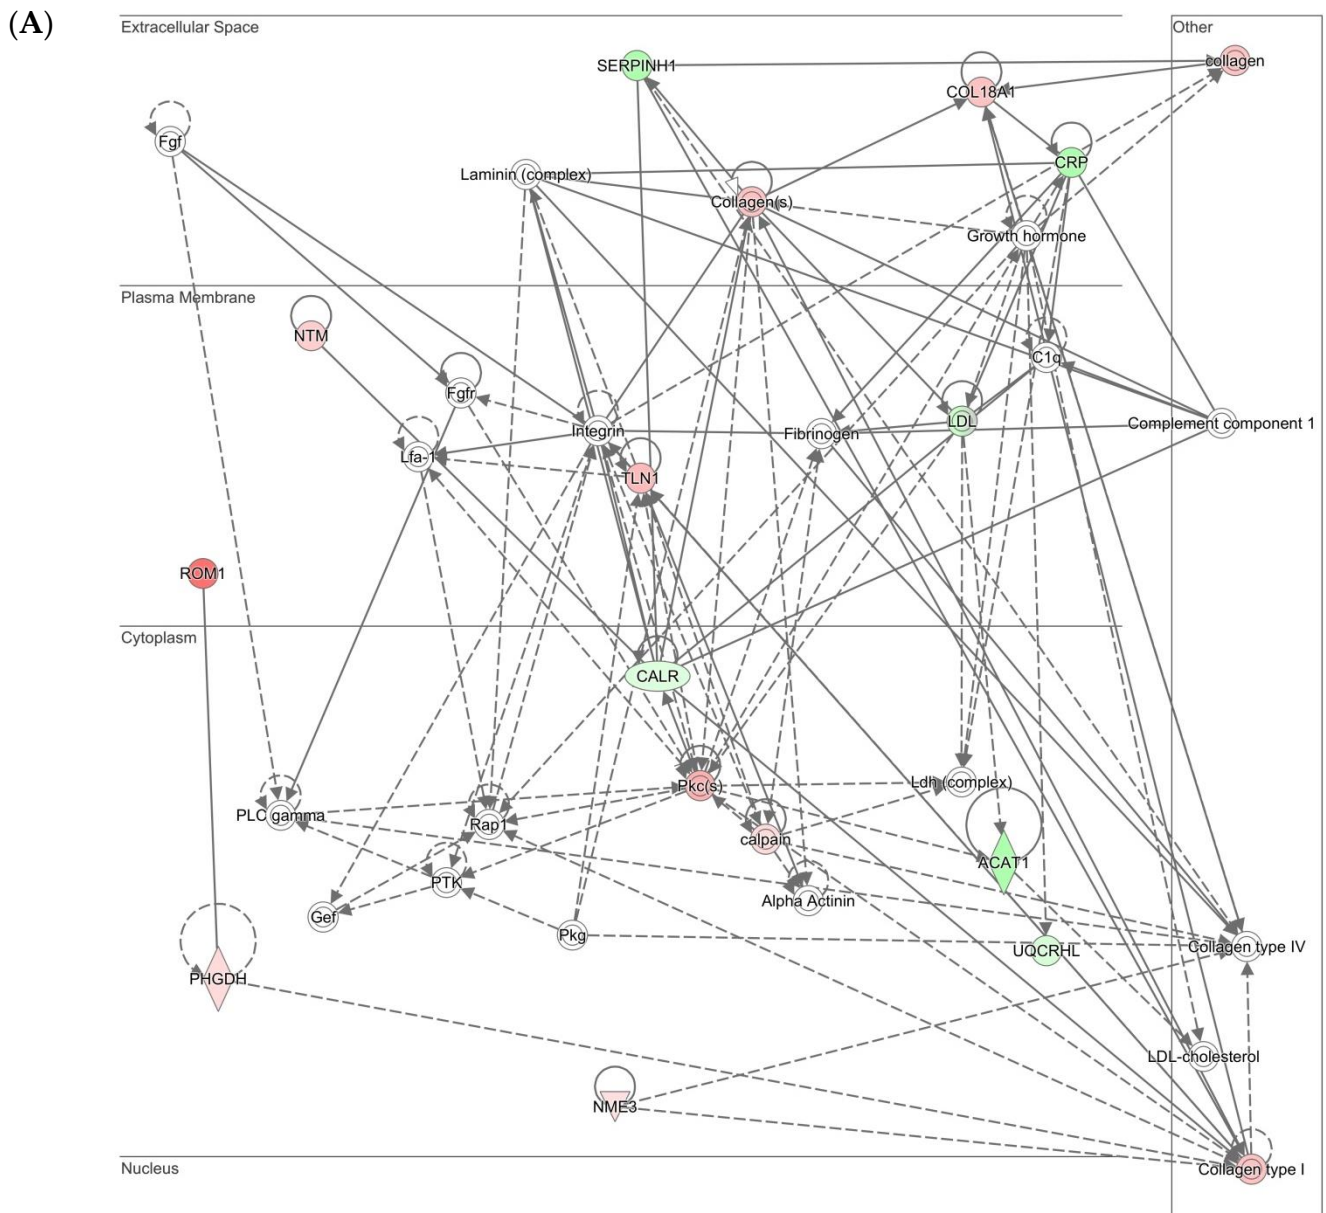

(B)

| Canonical pathway            | Targets                                                    | Z-score | p-value  |
|------------------------------|------------------------------------------------------------|---------|----------|
| Actin cytoskeleton signaling | Alpha Actinin, Fgfr, Gef, Integrin, Lfa-1, PTK, Rap1, TLN1 | 1.7     | 9.96E-05 |
| Axonal guidance signaling    | Gef, Integrin, Lfa-1, Pkc, PLC gamma, PTK, Rap1            | N/A     | 1.76E-01 |
| ERK/MAPK signaling           | Integrin, Lfa-1, Pkc, PLC gamma, PTK, Rap1, TLN1           | 1.8     | 2.40E-2  |

**Figure S16.** IPA<sup>®</sup> network linked to amino acid metabolism, cellular assembly and organization, small- molecule biochemistry (A). The network was assembled from E<sub>2</sub>-regulated proteins in the retina of OVX rats through identification by label-free shotgun proteomics. In the network, red and green colors denote upregulation and downregulation in response to E<sub>2</sub> treatment, respectively. The intensity of color indicates the relative magnitude of fold change in the protein's expression pattern. Solid and dashed lines represent direct and indirect interactions, respectively. For further details on symbols and relationships, see [http://qiagen.force.com/KnowledgeBase/articles/Basic\\_Technical\\_Q\\_A/Legend](http://qiagen.force.com/KnowledgeBase/articles/Basic_Technical_Q_A/Legend). Inset table (B): Top canonical pathways and their corresponding molecular targets associated with the network shown. Z-scores indicate activation or suppression of the corresponding pathway (positive or negative values, respectively; N/A: no prediction can be made).



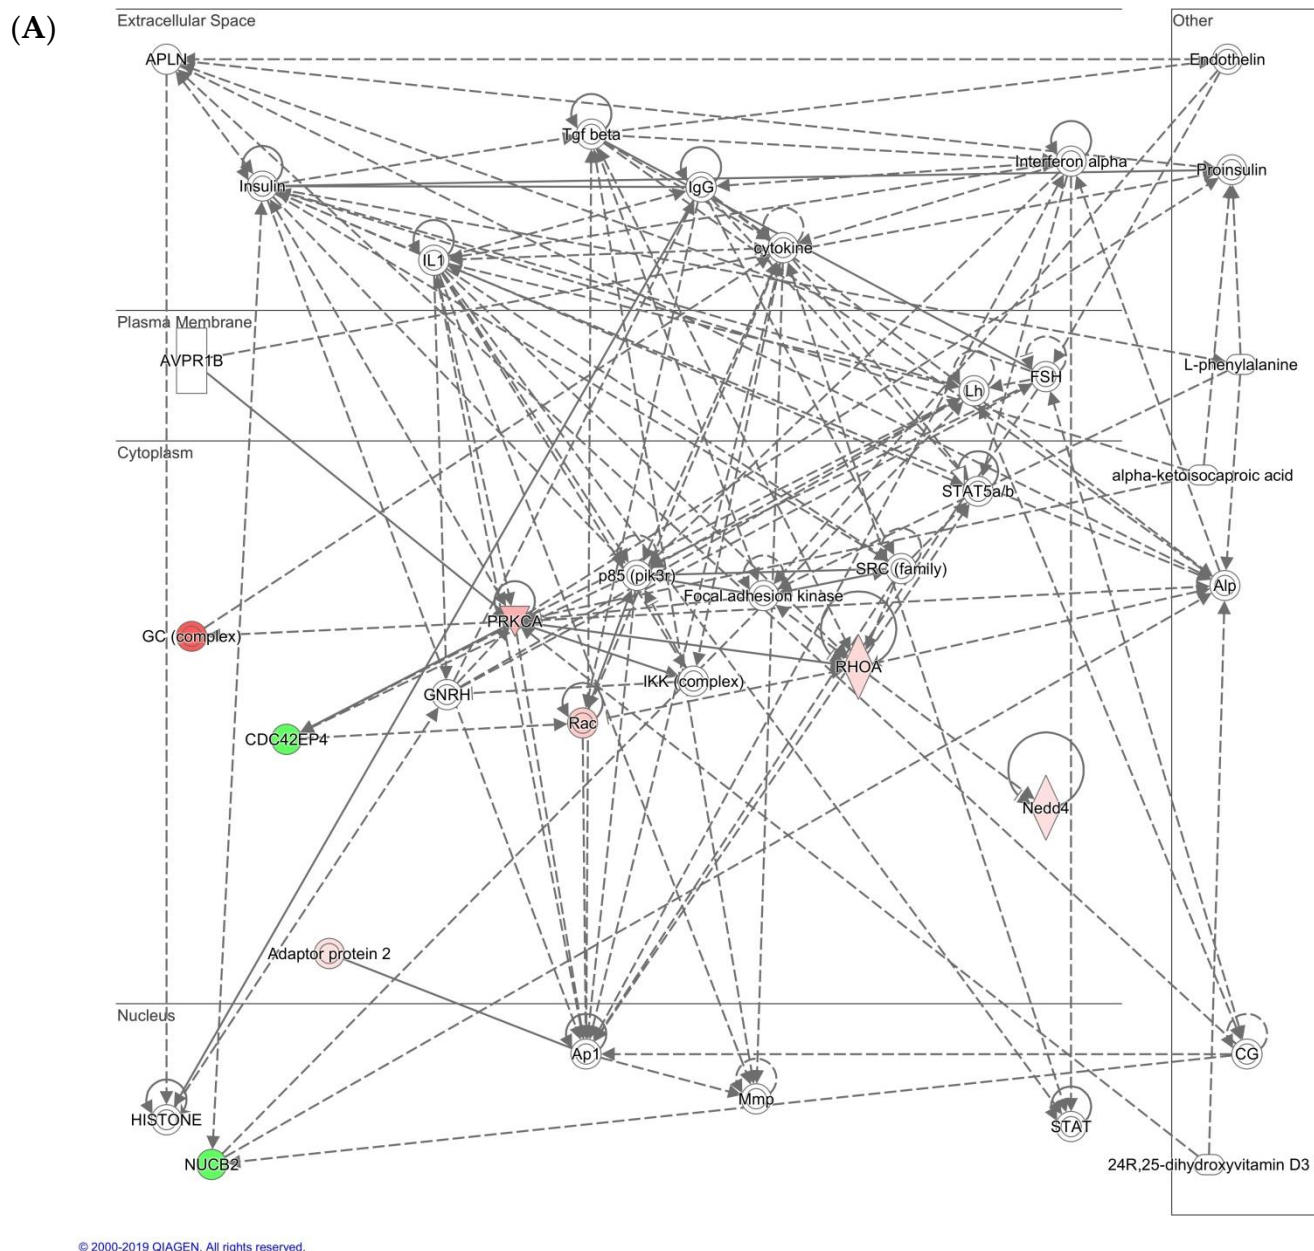

(B)

| Canonical pathway         | Targets                                                                 | Z-score | p-value  |
|---------------------------|-------------------------------------------------------------------------|---------|----------|
| Axonal guidance signaling | Focal adhesion kinase, Mmp, p85 (pik3r), PRKCA, Rac, RHOA, SRC          | N/A     | 1.76E-01 |
| ERK/MAPK signaling        | Ap1, Focal adhesion kinase, HISTONE, p85 (pik3r), PRKCA, Rac, SRC, STAT | 1.8     | 2.40E-02 |

**Figure S17.** IPA<sup>®</sup> network linked to cell death and survival, cellular development, cellular growth and proliferation (A). The network was assembled from E<sub>2</sub>-regulated proteins in the retina of OVX rats through identification by label-free shotgun proteomics. In the network, red and green colors denote upregulation and downregulation in response to E<sub>2</sub> treatment, respectively. The intensity of color indicates the relative magnitude of fold change in the protein's expression pattern. Solid and dashed lines represent direct and indirect interactions, respectively. For further details on symbols and relationships, see [http://qiagen.force.com/KnowledgeBase/articles/Basic\\_Technical\\_Q\\_A/Legend](http://qiagen.force.com/KnowledgeBase/articles/Basic_Technical_Q_A/Legend). Inset table (B): Top canonical pathways and their corresponding molecular targets associated with the network shown. Z-scores indicate activation or suppression of the corresponding pathway (positive or negative values, respectively; N/A: no prediction can be made).

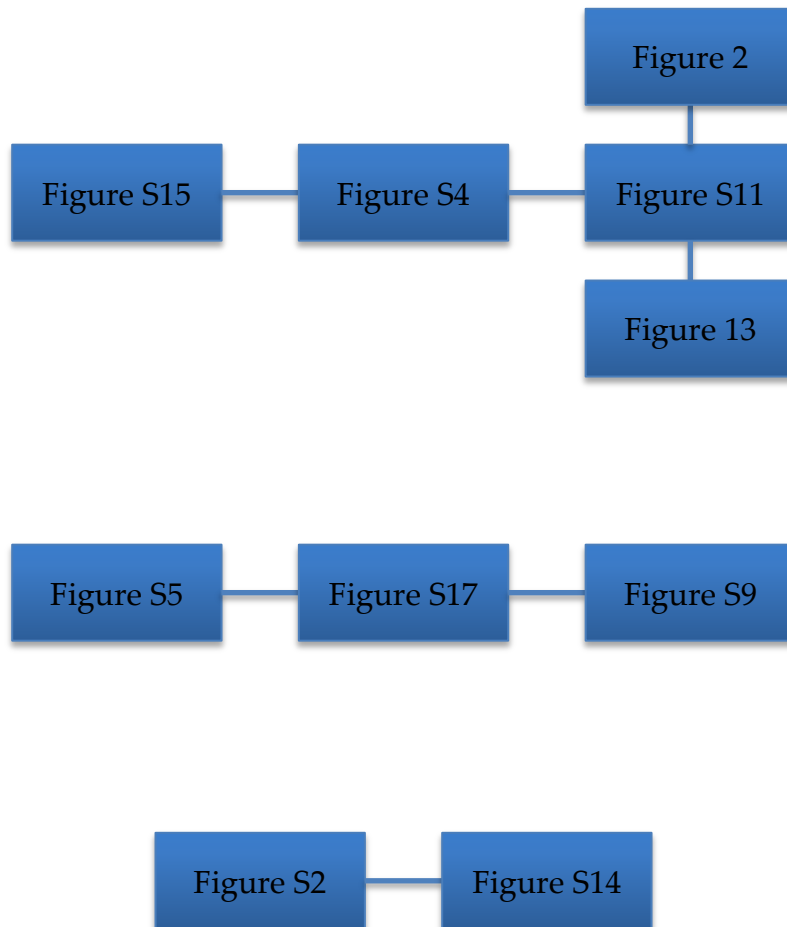

**Figure S18.** Overlapping IPA<sup>®</sup> networks.
