# Supplementary material for: 17β-Estradiol Delivered in Eye Drops: Evidence of Impact on Protein Networks and Associated Biological Processes in the Rat Retina through Quantitative Proteomics
Source: Pharmaceutics. 2020 Jan 27;12(2):101. doi: 10.3390/pharmaceutics12020101 (PMC7076522; doi:10.3390/pharmaceutics12020101)
Supplement: Supplementary file 1 [file pharmaceutics-12-00101-s001.zip › pharmaceutics-685990_TableS1.xlsx]

## Sheet: Scaffold default GO annotations
Table S1. List of identified and validated poteins (Scaffold 4.9.0: >95% and >99% probability by Peptide Prophet and protein Prophet, respectively, with minimum of two unique peptides) in the retina, along with their gene ontology (GO) annotations.
Identified Proteins (1680/1713)	Accession Number	Molecular Weight	biological adhesion	biological regulation	cell killing	cellular process	developmental process	establishment of localization	growth	immune system process	localization	locomotion	metabolic process	multi-organism process	multicellular organismal process	pigmentation	reproduction	reproductive process	response to stimulus	rhythmic process	viral process	Golgi apparatus	cytoplasm	cytoskeleton	endoplasmic reticulum	endosome	extracellular region	intracellular organelle	membrane	mitochondrion	nucleus	organelle membrane	organelle part	plasma membrane	ribosome	antioxidant activity	transport	binding	catalytic activity	obsolete chaperone regulator activity	chemoattractant activity	chemorepellent activity	electron carrier activity	enzyme regulator activity	metallochaperone activity	molecular function	molecular transducer activity	motor activity	nutrient reservoir activity
10 kDa heat shock protein, mitochondrial OS=Rattus norvegicus OX=10116 GN=Hspe1 PE=1 SV=3	CH10_RAT	11 kDa				chaperone mediated protein folding requiring cofactor																	mitochondrial matrix, mitochondrion					mitochondrial matrix, mitochondrion		mitochondrial matrix			mitochondrial matrix					ATP binding, chaperone binding, metal ion binding, unfolded protein binding								ATP binding, chaperone binding, metal ion binding, unfolded protein binding
26S proteasome non-ATPase regulatory subunit 1 OS=Rattus norvegicus OX=10116 GN=Psmd1 PE=1 SV=1	G3V8B6_RAT	106 kDa
26S proteasome non-ATPase regulatory subunit 13 OS=Rattus norvegicus OX=10116 GN=Psmd13 PE=1 SV=1	PSD13_RAT	43 kDa				meiosis I, proteasome assembly, ubiquitin-dependent protein catabolic process							ubiquitin-dependent protein catabolic process				meiosis I	meiosis I					cytosol					nucleus			nucleus															structural molecule activity
26S proteasome non-ATPase regulatory subunit 2 OS=Rattus norvegicus OX=10116 GN=Psmd2 PE=1 SV=1	PSMD2_RAT	100 kDa		regulation of protein catabolic process		proteasome-mediated ubiquitin-dependent protein catabolic process							proteasome-mediated ubiquitin-dependent protein catabolic process										proteasome storage granule					nucleus			nucleus													enzyme regulator activity		enzyme regulator activity
26S proteasome non-ATPase regulatory subunit 9 OS=Rattus norvegicus OX=10116 GN=Psmd9 PE=1 SV=1	G3V9P0_RAT (+1)	25 kDa
26S proteasome regulatory subunit 6B OS=Rattus norvegicus OX=10116 GN=Psmc4 PE=1 SV=1	PRS6B_RAT	47 kDa		positive regulation of RNA polymerase II transcriptional preinitiation complex assembly			blastocyst development						protein catabolic process		blastocyst development								cytosolic proteasome complex					nucleus			nucleus							ATP binding	ATPase activity, proteasome-activating ATPase activity							ATP binding, ATPase activity, proteasome-activating ATPase activity
26S proteasome regulatory subunit 7 OS=Rattus norvegicus OX=10116 GN=Psmc2 PE=1 SV=1	G3V7L6_RAT (+1)	49 kDa
26S proteasome regulatory subunit 8 OS=Rattus norvegicus OX=10116 GN=Psmc5 PE=1 SV=1	PRS8_RAT	46 kDa		modulation of synaptic transmission, negative regulation of transcription, DNA-templated, positive regulation of RNA polymerase II transcriptional preinitiation complex assembly, positive regulation of inclusion body assembly, regulation of protein catabolic process at postsynapse, modulating synaptic transmission		proteasome-mediated ubiquitin-dependent protein catabolic process							proteasome-mediated ubiquitin-dependent protein catabolic process										cytoplasmic vesicle, cytosolic proteasome complex					cytoplasmic vesicle, nuclear proteasome complex, nucleus			nuclear proteasome complex		nuclear proteasome complex					ATP binding, TBP-class protein binding, thyrotropin-releasing hormone receptor binding	ATPase activity							ATP binding, ATPase activity, TBP-class protein binding, thyrotropin-releasing hormone receptor binding
28 kDa heat- and acid-stable phosphoprotein OS=Rattus norvegicus OX=10116 GN=Pdap1 PE=1 SV=1	HAP28_RAT	21 kDa																					cytosol						plasma membrane					plasma membrane
2-oxoglutarate dehydrogenase, mitochondrial OS=Rattus norvegicus OX=10116 GN=Ogdh PE=1 SV=1	ODO1_RAT	116 kDa				2-oxoglutarate metabolic process, NADH metabolic process, generation of precursor metabolites and energy, glycolytic process, pyramidal neuron development, succinyl-CoA metabolic process, tangential migration from the subventricular zone to the olfactory bulb, tricarboxylic acid cycle	cerebellar cortex development, hippocampus development, olfactory bulb mitral cell layer development, pyramidal neuron development, striatum development, tangential migration from the subventricular zone to the olfactory bulb, thalamus development				tangential migration from the subventricular zone to the olfactory bulb	tangential migration from the subventricular zone to the olfactory bulb	2-oxoglutarate metabolic process, NADH metabolic process, generation of precursor metabolites and energy, glycolytic process, succinyl-CoA metabolic process, tricarboxylic acid cycle		cerebellar cortex development, hippocampus development, olfactory bulb mitral cell layer development, pyramidal neuron development, striatum development, tangential migration from the subventricular zone to the olfactory bulb, thalamus development								mitochondrial matrix, mitochondrial membrane, mitochondrion, oxoglutarate dehydrogenase complex					mitochondrial matrix, mitochondrial membrane, mitochondrion, nucleus	mitochondrial membrane	mitochondrial matrix, mitochondrial membrane, mitochondrion	nucleus	mitochondrial membrane	mitochondrial matrix, mitochondrial membrane					chaperone binding, heat shock protein binding, metal ion binding, thiamine pyrophosphate binding	oxoglutarate dehydrogenase (NAD+) activity, oxoglutarate dehydrogenase (succinyl-transferring) activity							chaperone binding, heat shock protein binding, metal ion binding, oxoglutarate dehydrogenase (NAD+) activity, oxoglutarate dehydrogenase (succinyl-transferring) activity, thiamine pyrophosphate binding
3-hydroxyisobutyrate dehydrogenase, mitochondrial OS=Rattus norvegicus OX=10116 GN=Hibadh PE=1 SV=3	3HIDH_RAT	35 kDa				valine catabolic process							valine catabolic process										mitochondrion					mitochondrion		mitochondrion								NAD binding, NADP binding	3-hydroxyisobutyrate dehydrogenase activity							3-hydroxyisobutyrate dehydrogenase activity, NAD binding, NADP binding
3-ketoacyl-CoA thiolase A, peroxisomal OS=Rattus norvegicus OX=10116 GN=Acaa1a PE=1 SV=2	F1LPD6_RAT (+1)	45 kDa
3-mercaptopyruvate sulfurtransferase OS=Rattus norvegicus OX=10116 GN=Mpst PE=1 SV=3	THTM_RAT	33 kDa				hydrogen sulfide biosynthetic process, transsulfuration	kidney development, liver development, spinal cord development						hydrogen sulfide biosynthetic process, transsulfuration		kidney development, liver development, spinal cord development								cytosol, mitochondrion					mitochondrion		mitochondrion								identical protein binding	3-mercaptopyruvate sulfurtransferase activity, thiosulfate sulfurtransferase activity							3-mercaptopyruvate sulfurtransferase activity, identical protein binding, thiosulfate sulfurtransferase activity
40S ribosomal protein S15 OS=Rattus norvegicus OX=10116 GN=Rps15 PE=1 SV=2	RS15_RAT	17 kDa				ribosomal small subunit assembly, translation	liver regeneration						translation		liver regeneration								cytosolic small ribosomal subunit					cytosolic small ribosomal subunit, nucleoplasm			nucleoplasm		cytosolic small ribosomal subunit, nucleoplasm		cytosolic small ribosomal subunit			RNA binding								RNA binding, structural constituent of ribosome
40S ribosomal protein S21 OS=Rattus norvegicus OX=10116 GN=Rps21 PE=1 SV=1	A0A0G2JXC3_RAT (+1)	9 kDa
40S ribosomal protein S28 OS=Rattus norvegicus OX=10116 GN=Rps28 PE=1 SV=1	RS28_RAT	8 kDa				cytoplasmic translation, maturation of SSU-rRNA, ribosomal small subunit assembly							cytoplasmic translation, maturation of SSU-rRNA										cytoplasmic side of rough endoplasmic reticulum membrane, cytosolic small ribosomal subunit, polysomal ribosome		cytoplasmic side of rough endoplasmic reticulum membrane			cytoplasmic side of rough endoplasmic reticulum membrane, cytosolic small ribosomal subunit, polysomal ribosome	cytoplasmic side of rough endoplasmic reticulum membrane			cytoplasmic side of rough endoplasmic reticulum membrane	cytoplasmic side of rough endoplasmic reticulum membrane, cytosolic small ribosomal subunit		cytosolic small ribosomal subunit, polysomal ribosome			RNA binding								RNA binding, structural constituent of ribosome
40S ribosomal protein S3 OS=Rattus norvegicus OX=10116 GN=Rps3 PE=1 SV=1	RS3_RAT	27 kDa		positive regulation of DNA repair, positive regulation of apoptotic signaling pathway, regulation of apoptotic process, regulation of translation		DNA repair, apoptotic process, cell cycle, cell division, cellular response to DNA damage stimulus, cellular response to nerve growth factor stimulus, translation							DNA repair, translation						DNA repair, cellular response to nerve growth factor stimulus				cytosolic small ribosomal subunit, mitochondrial inner membrane	spindle				cytosolic small ribosomal subunit, mitochondrial inner membrane, nucleolus, nucleus, spindle	mitochondrial inner membrane	mitochondrial inner membrane	nucleolus	mitochondrial inner membrane	cytosolic small ribosomal subunit, mitochondrial inner membrane, nucleolus, spindle		cytosolic small ribosomal subunit			RNA binding, damaged DNA binding, kinase binding, oxidized purine DNA binding	DNA-(apurinic or apyrimidinic site) lyase activity, oxidized purine nucleobase lesion DNA N-glycosylase activity							DNA-(apurinic or apyrimidinic site) lyase activity, RNA binding, damaged DNA binding, kinase binding, oxidized purine DNA binding, oxidized purine nucleobase lesion DNA N-glycosylase activity, structural constituent of ribosome
40S ribosomal protein S7 OS=Rattus norvegicus OX=10116 GN=Rps7 PE=1 SV=1	RS7_RAT	22 kDa				rRNA processing, translation							rRNA processing, translation										cytosolic small ribosomal subunit	microtubule organizing center				cytosolic small ribosomal subunit, microtubule organizing center					cytosolic small ribosomal subunit, microtubule organizing center		cytosolic small ribosomal subunit			poly(U) RNA binding								poly(U) RNA binding, structural constituent of ribosome
40S ribosomal protein S8 OS=Rattus norvegicus OX=10116 GN=RGD1566369 PE=3 SV=1	D3ZIE1_RAT (+2)	24 kDa
40S ribosomal protein SA OS=Rattus norvegicus OX=10116 GN=Rpsa PE=1 SV=3	RSSA_RAT	33 kDa	cell-cell adhesion			cytoplasmic translation, epithelial cell differentiation, ribosomal small subunit assembly	epithelial cell differentiation						cytoplasmic translation										cytosol, cytosolic small ribosomal subunit				basement membrane	cytosolic small ribosomal subunit, nucleus	membrane, plasma membrane		nucleus		cytosolic small ribosomal subunit	plasma membrane	cytosolic small ribosomal subunit			laminin binding								laminin binding, laminin receptor activity, structural constituent of ribosome	laminin receptor activity
4-aminobutyrate aminotransferase, mitochondrial OS=Rattus norvegicus OX=10116 GN=Abat PE=1 SV=3	GABT_RAT	56 kDa		negative regulation of blood pressure, negative regulation of dopamine secretion, negative regulation of gamma-aminobutyric acid secretion, negative regulation of platelet aggregation, neurotransmitter catabolic process, positive regulation of aspartate secretion, positive regulation of dopamine metabolic process, positive regulation of heat generation, positive regulation of inhibitory postsynap…		gamma-aminobutyric acid biosynthetic process, gamma-aminobutyric acid catabolic process, neurotransmitter catabolic process	aging, cerebellum development						gamma-aminobutyric acid biosynthetic process, gamma-aminobutyric acid catabolic process, neurotransmitter catabolic process	copulation	behavioral response to cocaine, cerebellum development, negative regulation of blood pressure		copulation	copulation	behavioral response to cocaine, response to drug, response to ethanol, response to hypoxia, response to iron ion, response to nicotine				mitochondrial matrix, mitochondrion					mitochondrial matrix, mitochondrion		mitochondrial matrix, mitochondrion			mitochondrial matrix					iron-sulfur cluster binding, metal ion binding, protein homodimerization activity, pyridoxal phosphate binding, succinate-semialdehyde dehydrogenase binding	(S)-3-amino-2-methylpropionate transaminase activity, 4-aminobutyrate transaminase activity, 4-aminobutyrate:2-oxoglutarate transaminase activity							(S)-3-amino-2-methylpropionate transaminase activity, 4-aminobutyrate transaminase activity, 4-aminobutyrate:2-oxoglutarate transaminase activity, iron-sulfur cluster binding, metal ion binding, protein homodimerization activity, pyridoxal phosphate binding, succinate-semialdehyde dehydrogenase binding
4F2 cell-surface antigen heavy chain OS=Rattus norvegicus OX=10116 GN=Slc3a2 PE=1 SV=1	A0A0H2UHQ0_RAT	62 kDa
4-trimethylaminobutyraldehyde dehydrogenase OS=Rattus norvegicus OX=10116 GN=Aldh9a1 PE=1 SV=1	A0A0G2JSI1_RAT (+1)	54 kDa
60 kDa heat shock protein, mitochondrial OS=Rattus norvegicus OX=10116 GN=Hspd1 PE=1 SV=1	CH60_RAT	61 kDa		negative regulation of apoptotic process in bone marrow, negative regulation of neuron apoptotic process, negative regulation of reactive oxygen species biosynthetic process, positive regulation of T cell activation, positive regulation of inflammatory response, positive regulation of interferon-alpha production, positive regulation of interferon-gamma production, positive regulation of interleuk…		'de novo' protein folding, T cell activation, apoptotic mitochondrial changes, cellular response to heat, cellular response to interleukin-7, protein import into mitochondrial intermembrane space, protein refolding		protein import into mitochondrial intermembrane space		T cell activation	protein import into mitochondrial intermembrane space			response to lipopolysaccharide					cellular response to heat, cellular response to interleukin-7, response to ATP, response to activity, response to cocaine, response to cold, response to drug, response to estrogen, response to glucocorticoid, response to heat, response to hydrogen peroxide, response to hypoxia, response to ischemia, response to lipopolysaccharide, response to organic cyclic compound, response to organic substance			Golgi apparatus	Golgi apparatus, cytosol, mitochondrial crista, mitochondrial inner membrane, mitochondrial matrix, mitochondrion, peroxisomal matrix, rough endoplasmic reticulum, zymogen granule		rough endoplasmic reticulum		extracellular space	Golgi apparatus, mitochondrial crista, mitochondrial inner membrane, mitochondrial matrix, mitochondrion, peroxisomal matrix, rough endoplasmic reticulum, zymogen granule	membrane raft, mitochondrial crista, mitochondrial inner membrane, plasma membrane	mitochondrial crista, mitochondrial inner membrane, mitochondrial matrix		mitochondrial crista, mitochondrial inner membrane	mitochondrial crista, mitochondrial inner membrane, mitochondrial matrix, peroxisomal matrix	plasma membrane				ATP binding, insulin binding, lipopolysaccharide binding, macromolecular complex binding, protease binding, protein heterodimerization activity, unfolded protein binding	isomerase activity							ATP binding, insulin binding, isomerase activity, lipopolysaccharide binding, macromolecular complex binding, protease binding, protein heterodimerization activity, unfolded protein binding
60S acidic ribosomal protein P1 OS=Rattus norvegicus OX=10116 GN=Rplp1 PE=3 SV=1	RLA1_RAT	11 kDa		positive regulation of translation		cellular response to Thyroid stimulating hormone, cellular response to cAMP, cytoplasmic translation, translational elongation							cytoplasmic translation, translational elongation						cellular response to Thyroid stimulating hormone, cellular response to cAMP				cytosolic large ribosomal subunit					cytosolic large ribosomal subunit					cytosolic large ribosomal subunit		cytosolic large ribosomal subunit			ribonucleoprotein complex binding						protein kinase activator activity		protein kinase activator activity, ribonucleoprotein complex binding, structural constituent of ribosome
60S ribosomal protein L12 OS=Rattus norvegicus OX=10116 GN=Rpl12 PE=2 SV=1	RL12_RAT	18 kDa		positive regulation of translational elongation		ribosomal large subunit assembly, translation							translation										cytosolic large ribosomal subunit					cytosolic large ribosomal subunit					cytosolic large ribosomal subunit		cytosolic large ribosomal subunit			large ribosomal subunit rRNA binding								large ribosomal subunit rRNA binding, structural constituent of ribosome
60S ribosomal protein L22 OS=Rattus norvegicus OX=10116 GN=LOC100360057 PE=1 SV=1	Q6PDV8_RAT	15 kDa
60S ribosomal protein L27 OS=Rattus norvegicus OX=10116 GN=Rpl27 PE=2 SV=2	RL27_RAT	16 kDa				rRNA processing, translation							rRNA processing, translation						response to aldosterone				cytoplasmic side of rough endoplasmic reticulum membrane, cytosolic large ribosomal subunit, ribosome		cytoplasmic side of rough endoplasmic reticulum membrane			cytoplasmic side of rough endoplasmic reticulum membrane, cytosolic large ribosomal subunit, ribosome	cytoplasmic side of rough endoplasmic reticulum membrane			cytoplasmic side of rough endoplasmic reticulum membrane	cytoplasmic side of rough endoplasmic reticulum membrane, cytosolic large ribosomal subunit		cytosolic large ribosomal subunit											structural constituent of ribosome
60S ribosomal protein L3 OS=Rattus norvegicus OX=10116 GN=Rpl3 PE=1 SV=3	RL3_RAT	46 kDa				cellular response to interleukin-4, ribosomal large subunit assembly, translation							translation						cellular response to interleukin-4				cytosolic large ribosomal subunit, ribosome					cytosolic large ribosomal subunit, nucleolus, ribosome			nucleolus		cytosolic large ribosomal subunit, nucleolus		cytosolic large ribosomal subunit, ribosome			5S rRNA binding								5S rRNA binding, structural constituent of ribosome
60S ribosomal protein L5 OS=Rattus norvegicus OX=10116 GN=Rpl5 PE=1 SV=3	RL5_RAT	34 kDa		positive regulation of isoleucine-tRNA ligase activity, positive regulation of methionine-tRNA ligase activity, positive regulation of phosphatase activity, positive regulation of threonine-tRNA ligase activity		cellular response to inorganic substance, ribosomal large subunit assembly, translation							translation						cellular response to inorganic substance				cytosolic large ribosomal subunit, cytosolic ribosome					cytosolic large ribosomal subunit, cytosolic ribosome, nucleolus			nucleolus		cytosolic large ribosomal subunit, nucleolus		cytosolic large ribosomal subunit, cytosolic ribosome			5S rRNA binding, mRNA binding								5S rRNA binding, mRNA binding, structural constituent of ribosome
Acetyl-CoA acetyltransferase, mitochondrial OS=Rattus norvegicus OX=10116 GN=Acat1 PE=1 SV=1	THIL_RAT	45 kDa				acetyl-CoA biosynthetic process, acetyl-CoA catabolic process, coenzyme A biosynthetic process, fatty acid beta-oxidation, isoleucine catabolic process, ketone body catabolic process, propionyl-CoA biosynthetic process, protein homooligomerization	adipose tissue development, brain development, liver development, metanephric proximal convoluted tubule development						acetyl-CoA biosynthetic process, acetyl-CoA catabolic process, coenzyme A biosynthetic process, fatty acid beta-oxidation, isoleucine catabolic process, ketone body catabolic process, propionyl-CoA biosynthetic process		adipose tissue development, brain development, liver development, metanephric proximal convoluted tubule development				response to hormone, response to organic cyclic compound, response to starvation				mitochondrial matrix, mitochondrion					mitochondrial matrix, mitochondrion		mitochondrial matrix			mitochondrial matrix					coenzyme binding, enzyme binding, metal ion binding, protein homodimerization activity	acetyl-CoA C-acetyltransferase activity, acetyl-CoA C-acyltransferase activity							acetyl-CoA C-acetyltransferase activity, acetyl-CoA C-acyltransferase activity, coenzyme binding, enzyme binding, metal ion binding, protein homodimerization activity
Acidic leucine-rich nuclear phosphoprotein 32 family member A OS=Rattus norvegicus OX=10116 GN=Anp32a PE=2 SV=1	AN32A_RAT (+1)	29 kDa		negative regulation of histone acetylation, negative regulation of neuron projection development		negative regulation of neuron projection development	negative regulation of neuron projection development	nucleocytoplasmic transport			nucleocytoplasmic transport				negative regulation of neuron projection development								cytosol, endoplasmic reticulum, perinuclear region of cytoplasm		endoplasmic reticulum			endoplasmic reticulum, nucleus			nucleus							cell adhesion molecule binding, histone binding, integrin binding, protein C-terminus binding								cell adhesion molecule binding, histone binding, integrin binding, protein C-terminus binding
Acidic leucine-rich nuclear phosphoprotein 32 family member B OS=Rattus norvegicus OX=10116 GN=Anp32b PE=1 SV=1	AN32B_RAT	31 kDa		negative regulation of apoptotic process, positive regulation of G1/S transition of mitotic cell cycle, positive regulation of cell proliferation																								nucleus			nucleus							histone binding								histone binding
Acidic leucine-rich nuclear phosphoprotein 32 family member E OS=Rattus norvegicus OX=10116 GN=Anp32e PE=2 SV=1	AN32E_RAT	29 kDa				histone exchange																	cytoplasmic vesicle					Swr1 complex, cytoplasmic vesicle			Swr1 complex		Swr1 complex					histone binding						phosphatase inhibitor activity		histone binding, phosphatase inhibitor activity
Aconitate hydratase, mitochondrial OS=Rattus norvegicus OX=10116 GN=Aco2 PE=1 SV=2	ACON_RAT	85 kDa				citrate metabolic process, isocitrate metabolic process, tricarboxylic acid cycle	liver development						citrate metabolic process, isocitrate metabolic process, tricarboxylic acid cycle		liver development				response to isolation stress				cytosol, mitochondrion					mitochondrion		mitochondrion								3 iron, 4 sulfur cluster binding, 4 iron, 4 sulfur cluster binding, iron ion binding	aconitate hydratase activity							3 iron, 4 sulfur cluster binding, 4 iron, 4 sulfur cluster binding, aconitate hydratase activity, iron ion binding
Actin-like 6A OS=Rattus norvegicus OX=10116 GN=Actl6a PE=1 SV=1	Q4KM87_RAT	47 kDa
Actin-related protein 2 OS=Rattus norvegicus OX=10116 GN=Actr2 PE=2 SV=1	ARP2_RAT	45 kDa		Arp2/3 complex-mediated actin nucleation, positive regulation of dendritic spine morphogenesis, positive regulation of double-strand break repair via homologous recombination, positive regulation of transcription from RNA polymerase II promoter		Arp2/3 complex-mediated actin nucleation, asymmetric cell division, cellular response to interferon-gamma, cellular response to trichostatin A, cilium assembly, establishment or maintenance of cell polarity, meiotic chromosome movement towards spindle pole, meiotic cytokinesis, positive regulation of dendritic spine morphogenesis, spindle localization	positive regulation of dendritic spine morphogenesis	cytosolic transport, meiotic chromosome movement towards spindle pole		cellular response to interferon-gamma	cytosolic transport, meiotic chromosome movement towards spindle pole, spindle localization				associative learning, positive regulation of dendritic spine morphogenesis		meiotic chromosome movement towards spindle pole, meiotic cytokinesis	meiotic chromosome movement towards spindle pole, meiotic cytokinesis	cellular response to interferon-gamma, cellular response to trichostatin A, response to ethanol, response to immobilization stress				actin cap, actin cortical patch, cytosol	Arp2/3 protein complex, actin cap, actin cortical patch, podosome core				Arp2/3 protein complex, actin cap, actin cortical patch, nucleus, podosome core, site of double-strand break			nucleus		Arp2/3 protein complex, actin cap, actin cortical patch, podosome core, site of double-strand break					ATP binding, actin filament binding, cytoskeletal protein binding								ATP binding, actin filament binding, cytoskeletal protein binding, structural constituent of cytoskeleton
Actin-related protein 2/3 complex subunit 1A OS=Rattus norvegicus OX=10116 GN=Arpc1a PE=2 SV=1	ARC1A_RAT	42 kDa		Arp2/3 complex-mediated actin nucleation		Arp2/3 complex-mediated actin nucleation																	cytoplasm	Arp2/3 protein complex				Arp2/3 protein complex, nucleus, site of double-strand break			nucleus		Arp2/3 protein complex, site of double-strand break					actin filament binding								actin filament binding
Actin-related protein 2/3 complex subunit 3 OS=Rattus norvegicus OX=10116 GN=Arpc3 PE=1 SV=1	B2GV73_RAT	21 kDa
Actin-related protein 2/3 complex subunit 5 OS=Rattus norvegicus OX=10116 GN=Arpc5 PE=1 SV=3	ARPC5_RAT	16 kDa		Arp2/3 complex-mediated actin nucleation		Arp2/3 complex-mediated actin nucleation, actin filament network formation, lamellipodium organization, maintenance of cell polarity, smooth muscle cell migration	orbitofrontal cortex development				microtubule organizing center localization, smooth muscle cell migration	smooth muscle cell migration			orbitofrontal cortex development								endosome	Arp2/3 protein complex		endosome		Arp2/3 protein complex, endosome, nucleus, site of double-strand break			nucleus		Arp2/3 protein complex, site of double-strand break					actin filament binding								actin filament binding, structural constituent of cytoskeleton
Actin-related protein 2/3 complex subunit 5-like protein OS=Rattus norvegicus OX=10116 GN=Arpc5l PE=1 SV=2	ARP5L_RAT	17 kDa		Arp2/3 complex-mediated actin nucleation		Arp2/3 complex-mediated actin nucleation, cell migration					cell migration	cell migration											cytoplasm	Arp2/3 protein complex				Arp2/3 protein complex					Arp2/3 protein complex					actin filament binding								actin filament binding
Activated RNA polymerase II transcriptional coactivator p15 OS=Rattus norvegicus OX=10116 GN=Sub1 PE=1 SV=3	TCP4_RAT	14 kDa		SMAD protein signal transduction, positive regulation of transcription initiation from RNA polymerase II promoter		SMAD protein signal transduction, protein homooligomerization													SMAD protein signal transduction									nucleolus, nucleus			nucleolus		nucleolus					RNA polymerase II distal enhancer sequence-specific DNA binding, activating transcription factor binding, identical protein binding, single-stranded DNA binding	DNA helicase activity							DNA helicase activity, RNA polymerase II distal enhancer sequence-specific DNA binding, activating transcription factor binding, identical protein binding, single-stranded DNA binding, transcription coactivator activity
Activator of Hsp90 ATPase activity 1 OS=Rattus norvegicus OX=10116 GN=Ahsa1 PE=1 SV=1	B0BN63_RAT	38 kDa
Acylamino-acid-releasing enzyme OS=Rattus norvegicus OX=10116 GN=Apeh PE=1 SV=1	ACPH_RAT (+1)	81 kDa																					cytoplasm																serine-type endopeptidase activity							serine-type endopeptidase activity
Acyl-CoA-binding domain-containing 7 OS=Rattus norvegicus OX=10116 GN=Acbd7 PE=4 SV=2	D3ZB36_RAT	10 kDa
Acyl-Coenzyme A binding domain containing 3 OS=Rattus norvegicus OX=10116 GN=Acbd3 PE=1 SV=1	A0A0G2K756_RAT (+1)	60 kDa
Acylphosphatase OS=Rattus norvegicus OX=10116 GN=Acyp1 PE=1 SV=1	D4A6X4_RAT	11 kDa
Acylphosphatase-2 OS=Rattus norvegicus OX=10116 GN=Acyp2 PE=1 SV=2	ACYP2_RAT	11 kDa																																					acylphosphatase activity							acylphosphatase activity
Acyl-protein thioesterase 1 OS=Rattus norvegicus OX=10116 GN=Lypla1 PE=1 SV=1	LYPA1_RAT	25 kDa		negative regulation of Golgi to plasma membrane protein transport		fatty acid metabolic process, protein depalmitoylation							fatty acid metabolic process, protein depalmitoylation										cytoplasm, cytosol																carboxylic ester hydrolase activity, lysophospholipase activity, palmitoyl-(protein) hydrolase activity							carboxylic ester hydrolase activity, lysophospholipase activity, palmitoyl-(protein) hydrolase activity
Acyl-protein thioesterase 2 OS=Rattus norvegicus OX=10116 GN=Lypla2 PE=1 SV=1	LYPA2_RAT	25 kDa				fatty acid metabolic process, protein depalmitoylation							fatty acid metabolic process, protein depalmitoylation									Golgi stack	Golgi stack					Golgi stack					Golgi stack						carboxylic ester hydrolase activity, palmitoyl-(protein) hydrolase activity							carboxylic ester hydrolase activity, palmitoyl-(protein) hydrolase activity
Adapter molecule crk OS=Rattus norvegicus OX=10116 GN=Crk PE=1 SV=1	CRK_RAT	34 kDa		activation of GTPase activity, activation of JUN kinase activity, ephrin receptor signaling pathway, negative regulation of cell motility, negative regulation of natural killer cell mediated cytotoxicity, negative regulation of wound healing, positive regulation of smooth muscle cell migration, positive regulation of substrate adhesion-dependent cell spreading, reelin-mediated signaling pathway, …		activation of JUN kinase activity, cell chemotaxis, cellular response to endothelin, cellular response to insulin-like growth factor stimulus, cellular response to nerve growth factor stimulus, cellular response to nitric oxide, cellular response to transforming growth factor beta stimulus, cerebellar neuron development, dendrite development, ephrin receptor signaling pathway, establishment of ce…	cerebellar neuron development, cerebral cortex development, dendrite development, hippocampus development, neuron migration, regulation of dendrite development			helper T cell diapedesis	cell chemotaxis, helper T cell diapedesis, neuron migration	cell chemotaxis, helper T cell diapedesis, neuron migration	activation of JUN kinase activity, lipid metabolic process	response to yeast	cerebellar neuron development, cerebral cortex development, dendrite development, hippocampus development, neuron migration, regulation of dendrite development				activation of JUN kinase activity, cell chemotaxis, cellular response to endothelin, cellular response to insulin-like growth factor stimulus, cellular response to nerve growth factor stimulus, cellular response to nitric oxide, cellular response to transforming growth factor beta stimulus, ephrin receptor signaling pathway, reelin-mediated signaling pathway, response to cholecystokinin, response…				cytosol	actin cytoskeleton				actin cytoskeleton	membrane raft, plasma membrane					plasma membrane				SH2 domain binding, SH3 domain binding, SH3/SH2 adaptor activity, cytoskeletal protein binding, ephrin receptor binding, insulin-like growth factor receptor binding, phosphotyrosine binding, protein binding, bridging, protein self-association, protein tyrosine kinase binding, scaffold protein binding								SH2 domain binding, SH3 domain binding, SH3/SH2 adaptor activity, cytoskeletal protein binding, ephrin receptor binding, insulin-like growth factor receptor binding, phosphotyrosine binding, protein binding, bridging, protein self-association, protein tyrosine kinase binding, scaffold protein binding
Adaptin ear-binding coat-associated protein 1 OS=Rattus norvegicus OX=10116 GN=Necap1 PE=1 SV=1	NECP1_RAT	30 kDa						endocytosis, protein transport			endocytosis, protein transport												clathrin vesicle coat					clathrin vesicle coat	clathrin vesicle coat, clathrin-coated pit, plasma membrane			clathrin vesicle coat	clathrin vesicle coat	plasma membrane
Adaptor protein, phosphotyrosine-interacting with PH domain and leucine zipper 1 OS=Rattus norvegicus OX=10116 GN=Appl1 PE=1 SV=3	D3ZWA8_RAT	75 kDa
Adenine phosphoribosyltransferase OS=Rattus norvegicus OX=10116 GN=Aprt PE=1 SV=1	APT_RAT	20 kDa		lactation		AMP salvage, adenine salvage, cellular response to insulin stimulus, purine ribonucleoside salvage	lactation	lactation			lactation		AMP salvage, adenine salvage, purine ribonucleoside salvage		lactation				cellular response to insulin stimulus				cytosol					nucleoplasm			nucleoplasm		nucleoplasm					AMP binding, adenine binding	adenine phosphoribosyltransferase activity							AMP binding, adenine binding, adenine phosphoribosyltransferase activity
Adenosylhomocysteinase OS=Rattus norvegicus OX=10116 GN=Ahcy PE=1 SV=3	SAHH_RAT	48 kDa				S-adenosylhomocysteine catabolic process, S-adenosylmethionine cycle, one-carbon metabolic process				chronic inflammatory response to antigenic stimulus			S-adenosylhomocysteine catabolic process, S-adenosylmethionine cycle, one-carbon metabolic process						chronic inflammatory response to antigenic stimulus, response to hypoxia, response to nutrient	circadian sleep/wake cycle			cytosol, melanosome					melanosome, nucleus			nucleus							NAD binding, adenyl nucleotide binding, identical protein binding	adenosylhomocysteinase activity, adenosylselenohomocysteinase activity							NAD binding, adenosylhomocysteinase activity, adenosylselenohomocysteinase activity, adenyl nucleotide binding, identical protein binding
Adenylyl cyclase-associated protein 1 OS=Rattus norvegicus OX=10116 GN=Cap1 PE=1 SV=3	CAP1_RAT	52 kDa				actin polymerization or depolymerization, ameboidal-type cell migration, cell morphogenesis, establishment or maintenance of cell polarity	cell morphogenesis	receptor-mediated endocytosis			ameboidal-type cell migration, receptor-mediated endocytosis	ameboidal-type cell migration											cortical actin cytoskeleton	cortical actin cytoskeleton				cortical actin cytoskeleton	plasma membrane				cortical actin cytoskeleton	plasma membrane				actin binding, adenylate cyclase binding								actin binding, adenylate cyclase binding
ADP-ribosylation factor GTPase-activating protein 1 OS=Rattus norvegicus OX=10116 GN=Arfgap1 PE=1 SV=1	ARFG1_RAT	45 kDa		regulation of ARF protein signal transduction, regulation of endocytosis				protein transport, vesicle-mediated transport			protein transport, vesicle-mediated transport											Golgi membrane	Golgi membrane					Golgi membrane	Golgi membrane			Golgi membrane	Golgi membrane					metal ion binding						GTPase activator activity		GTPase activator activity, metal ion binding
ADP-ribosylation factor-like protein 3 OS=Rattus norvegicus OX=10116 GN=Arl3 PE=1 SV=2	ARL3_RAT (+1)	20 kDa		small GTPase mediated signal transduction		cilium assembly, mitotic cytokinesis, photoreceptor cell development, small GTPase mediated signal transduction	kidney development, photoreceptor cell development	Golgi to plasma membrane transport, protein transport			Golgi to plasma membrane transport, protein localization to ciliary membrane, protein transport				kidney development, photoreceptor cell development				small GTPase mediated signal transduction			Golgi membrane	Golgi apparatus, Golgi membrane, cytoplasmic microtubule	centrosome, cytoplasmic microtubule, microtubule cytoskeleton, spindle microtubule				Golgi apparatus, Golgi membrane, centrosome, cytoplasmic microtubule, microtubule cytoskeleton, nucleus, spindle microtubule	Golgi membrane		nucleus	Golgi membrane	Golgi membrane, centrosome, cytoplasmic microtubule, photoreceptor connecting cilium, spindle microtubule					GDP binding, GTP binding, metal ion binding, microtubule binding								GDP binding, GTP binding, metal ion binding, microtubule binding
ADP-ribosylhydrolase like 2 (Predicted) OS=Rattus norvegicus OX=10116 GN=Adprhl2 PE=1 SV=1	B0K017_RAT	39 kDa
Aflatoxin B1 aldehyde reductase member 2 OS=Rattus norvegicus OX=10116 GN=Akr7a2 PE=1 SV=2	ARK72_RAT	41 kDa																				Golgi stack	Golgi apparatus, Golgi stack					Golgi apparatus, Golgi stack, nuclear envelope			nuclear envelope		Golgi stack, nuclear envelope						alditol:NADP+ 1-oxidoreductase activity, aldo-keto reductase (NADP) activity							alditol:NADP+ 1-oxidoreductase activity, aldo-keto reductase (NADP) activity
AHNAK nucleoprotein OS=Rattus norvegicus OX=10116 GN=Ahnak PE=1 SV=1	A0A0G2JU96_RAT-DECOY (+1)	?
AIP1, isoform CRA_a OS=Rattus norvegicus OX=10116 GN=Dpy30 PE=1 SV=1	G3V946_RAT	11 kDa
A-kinase anchor protein 12 OS=Rattus norvegicus OX=10116 GN=Akap12 PE=1 SV=1	AKA12_RAT	181 kDa		adenylate cyclase-inhibiting G-protein coupled receptor signaling pathway, negative regulation of vascular permeability, positive regulation of ERK1 and ERK2 cascade, positive regulation of nitric-oxide synthase biosynthetic process, positive regulation of oligodendrocyte apoptotic process, positive regulation of protein kinase A signaling, positive regulation of tumor necrosis factor biosyntheti…		adenylate cyclase-inhibiting G-protein coupled receptor signaling pathway, cellular response to interleukin-1, cellular response to tumor necrosis factor, hepatic stellate cell activation, signal transduction		protein targeting			protein targeting			response to lipopolysaccharide	negative regulation of vascular permeability				adenylate cyclase-inhibiting G-protein coupled receptor signaling pathway, cellular response to interleukin-1, cellular response to tumor necrosis factor, response to electrical stimulus, response to lipopolysaccharide, signal transduction				cytoplasm, cytosol	cytoskeleton				cytoskeleton	plasma membrane					plasma membrane				adenylate cyclase binding, calmodulin binding, protein kinase A binding								adenylate cyclase binding, calmodulin binding, protein kinase A binding
Alanine--tRNA ligase, cytoplasmic OS=Rattus norvegicus OX=10116 GN=Aars PE=1 SV=3	SYAC_RAT	107 kDa		negative regulation of neuron apoptotic process		mitochondrial alanyl-tRNA aminoacylation, tRNA modification	cerebellar Purkinje cell layer development						mitochondrial alanyl-tRNA aminoacylation, tRNA modification		cerebellar Purkinje cell layer development, neuromuscular process controlling balance								cytosol, mitochondrion					mitochondrion		mitochondrion								ATP binding, amino acid binding, tRNA binding, zinc ion binding	Ser-tRNA(Ala) hydrolase activity, alanine-tRNA ligase activity, aminoacyl-tRNA editing activity							ATP binding, Ser-tRNA(Ala) hydrolase activity, alanine-tRNA ligase activity, amino acid binding, aminoacyl-tRNA editing activity, tRNA binding, translation regulator activity, zinc ion binding
Aldehyde dehydrogenase, dimeric NADP-preferring OS=Rattus norvegicus OX=10116 GN=Aldh3a1 PE=1 SV=3	AL3A1_RAT	50 kDa		positive regulation of cell proliferation		cellular aldehyde metabolic process	aging						cellular aldehyde metabolic process, oxidation-reduction process						response to cAMP, response to drug, response to glucocorticoid, response to hypoxia, response to nutrient, response to organic cyclic compound				cytosol, endoplasmic reticulum		endoplasmic reticulum			endoplasmic reticulum	integral component of membrane, plasma membrane					plasma membrane					3-chloroallyl aldehyde dehydrogenase activity, alcohol dehydrogenase (NADP+) activity, benzaldehyde dehydrogenase (NAD+) activity							3-chloroallyl aldehyde dehydrogenase activity, alcohol dehydrogenase (NADP+) activity, benzaldehyde dehydrogenase (NAD+) activity
Aldehyde dehydrogenase, mitochondrial OS=Rattus norvegicus OX=10116 GN=Aldh2 PE=1 SV=1	ALDH2_RAT (+1)	56 kDa		negative regulation of apoptotic process		cellular response to fatty acid, cellular response to hormone stimulus	liver development						ethanol catabolic process	response to lipopolysaccharide	liver development				cellular response to fatty acid, cellular response to hormone stimulus, response to estradiol, response to hyperoxia, response to lipopolysaccharide, response to nicotine, response to progesterone, response to testosterone				mitochondrial matrix, mitochondrion					mitochondrial matrix, mitochondrion		mitochondrial matrix			mitochondrial matrix					NADH binding, identical protein binding	aldehyde dehydrogenase (NAD) activity, glyceraldehyde-3-phosphate dehydrogenase (NAD+) (non-phosphorylating) activity							NADH binding, aldehyde dehydrogenase (NAD) activity, glyceraldehyde-3-phosphate dehydrogenase (NAD+) (non-phosphorylating) activity, identical protein binding
Aldo-keto reductase family 1 member A1 OS=Rattus norvegicus OX=10116 GN=Akr1a1 PE=1 SV=2	AK1A1_RAT	37 kDa				D-glucuronate catabolic process, L-ascorbic acid biosynthetic process, aldehyde catabolic process, daunorubicin metabolic process, doxorubicin metabolic process							D-glucuronate catabolic process, L-ascorbic acid biosynthetic process, aldehyde catabolic process, daunorubicin metabolic process, doxorubicin metabolic process										cytosol						apical plasma membrane					apical plasma membrane					L-glucuronate reductase activity, alditol:NADP+ 1-oxidoreductase activity, allyl-alcohol dehydrogenase activity, glucuronolactone reductase activity, mevaldate reductase (NADPH) activity							L-glucuronate reductase activity, alditol:NADP+ 1-oxidoreductase activity, allyl-alcohol dehydrogenase activity, glucuronolactone reductase activity, mevaldate reductase (NADPH) activity
Aldo-keto reductase family 1 member B1 OS=Rattus norvegicus OX=10116 GN=Akr1b1 PE=1 SV=3	ALDR_RAT	36 kDa		negative regulation of apoptotic process, positive regulation of JAK-STAT cascade, positive regulation of smooth muscle cell proliferation, regulation of urine volume, renal water homeostasis, stress-activated protein kinase signaling cascade, tissue homeostasis		cellular hyperosmotic salinity response, cellular response to methylglyoxal, cellular response to peptide, daunorubicin metabolic process, doxorubicin metabolic process, naphthalene metabolic process, norepinephrine metabolic process, retinoid metabolic process, sorbitol biosynthetic process, stress-activated protein kinase signaling cascade	inner medullary collecting duct development, metanephric collecting duct development						daunorubicin metabolic process, doxorubicin metabolic process, monosaccharide metabolic process, naphthalene metabolic process, norepinephrine metabolic process, retinoid metabolic process, sorbitol biosynthetic process	maternal process involved in female pregnancy	inner medullary collecting duct development, maternal process involved in female pregnancy, metanephric collecting duct development, regulation of urine volume, renal water homeostasis, tissue homeostasis		maternal process involved in female pregnancy	maternal process involved in female pregnancy	cellular hyperosmotic salinity response, cellular response to methylglyoxal, cellular response to peptide, response to thyroid hormone, response to water deprivation, stress-activated protein kinase signaling cascade				cell projection cytoplasm, cytosol, mast cell granule, perinuclear region of cytoplasm				extracellular space	mast cell granule, nucleoplasm			nucleoplasm		nucleoplasm						NADP-retinol dehydrogenase activity, alcohol dehydrogenase (NADP+) activity, alditol:NADP+ 1-oxidoreductase activity, allyl-alcohol dehydrogenase activity, glyceraldehyde oxidoreductase activity, retinal dehydrogenase activity							NADP-retinol dehydrogenase activity, alcohol dehydrogenase (NADP+) activity, alditol:NADP+ 1-oxidoreductase activity, allyl-alcohol dehydrogenase activity, glyceraldehyde oxidoreductase activity, retinal dehydrogenase activity
Aldo-keto reductase family 1, member C19 OS=Rattus norvegicus OX=10116 GN=Akr1c19 PE=1 SV=1	D3ZEL2_RAT	37 kDa
Aldose 1-epimerase OS=Rattus norvegicus OX=10116 GN=Galm PE=1 SV=1	GALM_RAT	38 kDa											galactose catabolic process via UDP-galactose, glucose metabolic process										cytoplasm															carbohydrate binding	aldose 1-epimerase activity							aldose 1-epimerase activity, carbohydrate binding
ALG2, alpha-1,3/1,6-mannosyltransferase OS=Rattus norvegicus OX=10116 GN=Alg2 PE=1 SV=1	G3V6U3_RAT	47 kDa
Alpha glucosidase 2 alpha neutral subunit (Predicted) OS=Rattus norvegicus OX=10116 GN=Ganab PE=1 SV=1	D3ZAN3_RAT	91 kDa
Alpha-1-antiproteinase OS=Rattus norvegicus OX=10116 GN=Serpina1 PE=1 SV=1	A0A0G2JY31_RAT	46 kDa
Alpha-1-macroglobulin OS=Rattus norvegicus OX=10116 GN=A1m PE=1 SV=1	A1M_RAT	167 kDa					embryo implantation							embryo implantation	embryo implantation		embryo implantation	embryo implantation									extracellular space											brain-derived neurotrophic factor binding, macromolecular complex binding, nerve growth factor binding, protease binding						serine-type endopeptidase inhibitor activity		brain-derived neurotrophic factor binding, macromolecular complex binding, nerve growth factor binding, protease binding, serine-type endopeptidase inhibitor activity
Alpha-2-macroglobulin OS=Rattus norvegicus OX=10116 GN=A2m PE=2 SV=2	A2MG_RAT	164 kDa		negative regulation of endopeptidase activity		protein homotetramerization	embryonic liver development, luteinization			acute inflammatory response to antigenic stimulus					embryonic liver development, luteinization		luteinization	luteinization	acute inflammatory response to antigenic stimulus, acute-phase response, response to carbon dioxide, response to glucocorticoid, response to nutrient, response to prostaglandin E, response to wounding	luteinization							extracellular space											brain-derived neurotrophic factor binding, nerve growth factor binding, protease binding, protein homodimerization activity						serine-type endopeptidase inhibitor activity		brain-derived neurotrophic factor binding, nerve growth factor binding, protease binding, protein homodimerization activity, serine-type endopeptidase inhibitor activity
Alpha-2-macroglobulin receptor-associated protein OS=Rattus norvegicus OX=10116 GN=Lrpap1 PE=1 SV=2	AMRP_RAT	42 kDa		negative regulation of beta-amyloid clearance, negative regulation of cell death, negative regulation of protein binding, negative regulation of receptor internalization, negative regulation of very-low-density lipoprotein particle clearance, regulation of receptor-mediated endocytosis																		Golgi lumen	Golgi apparatus, Golgi lumen, endoplasmic reticulum-Golgi intermediate compartment, endosome, endosome lumen, rough endoplasmic reticulum, rough endoplasmic reticulum lumen		rough endoplasmic reticulum, rough endoplasmic reticulum lumen	endosome lumen		Golgi apparatus, Golgi lumen, cis-Golgi network, endoplasmic reticulum-Golgi intermediate compartment, endosome, endosome lumen, rough endoplasmic reticulum, rough endoplasmic reticulum lumen	plasma membrane				Golgi lumen, endosome lumen, rough endoplasmic reticulum lumen	plasma membrane				heparin binding, lipase binding, low-density lipoprotein particle receptor binding, receptor antagonist activity, very-low-density lipoprotein particle receptor binding								heparin binding, lipase binding, low-density lipoprotein particle receptor binding, receptor antagonist activity, very-low-density lipoprotein particle receptor binding
Alpha-aminoadipic semialdehyde dehydrogenase OS=Rattus norvegicus OX=10116 GN=Aldh7a1 PE=1 SV=2	AL7A1_RAT	59 kDa				glycine betaine biosynthetic process from choline							glycine betaine biosynthetic process from choline										cytosol, mitochondrion					mitochondrion, nucleus		mitochondrion	nucleus								L-aminoadipate-semialdehyde dehydrogenase activity, betaine-aldehyde dehydrogenase activity, glyceraldehyde-3-phosphate dehydrogenase (NAD+) (non-phosphorylating) activity							L-aminoadipate-semialdehyde dehydrogenase activity, betaine-aldehyde dehydrogenase activity, glyceraldehyde-3-phosphate dehydrogenase (NAD+) (non-phosphorylating) activity
Alpha-centractin OS=Rattus norvegicus OX=10116 GN=Actr1a PE=1 SV=1	ACTZ_RAT	43 kDa				establishment of mitotic spindle orientation, nuclear migration along microtubule		establishment of mitotic spindle orientation, nuclear migration along microtubule			establishment of mitotic spindle orientation, nuclear migration along microtubule			spermatogenesis	spermatogenesis		spermatogenesis	spermatogenesis				COPI-coated vesicle	COPI-coated vesicle, cell cortex region, centriole	centriole, centrosome, dynactin complex, manchette				COPI-coated vesicle, centriole, centrosome, dynactin complex, manchette					COPI-coated vesicle, centriole, centrosome, dynactin complex, manchette					ATP binding								ATP binding
Alpha-crystallin A chain OS=Rattus norvegicus OX=10116 GN=Cryaa PE=1 SV=1	CRYAA_RAT	22 kDa		negative regulation of cysteine-type endopeptidase activity involved in apoptotic process, negative regulation of gene expression, positive regulation of cell growth, positive regulation of protein phosphorylation		actin filament organization, apoptotic process involved in morphogenesis, lens fiber cell morphogenesis, microtubule-based process, mitochondrion organization, protein folding, protein homooligomerization, tubulin complex assembly	apoptotic process involved in morphogenesis, embryonic camera-type eye morphogenesis, lens development in camera-type eye, lens fiber cell morphogenesis, multicellular organism aging								embryonic camera-type eye morphogenesis, lens fiber cell morphogenesis, multicellular organism aging				response to UV-A, response to drug, response to glucocorticoid, response to hydrogen peroxide, response to hypoxia, response to lead ion				cytoplasm					nucleus			nucleus							identical protein binding, metal ion binding								identical protein binding, metal ion binding, structural constituent of eye lens
Alpha-crystallin B chain OS=Rattus norvegicus OX=10116 GN=Cryab PE=1 SV=1	CRYAB_RAT	20 kDa		negative regulation of amyloid fibril formation, negative regulation of cell growth, negative regulation of cysteine-type endopeptidase activity involved in apoptotic process, negative regulation of intracellular transport, negative regulation of protein complex assembly, negative regulation of reactive oxygen species metabolic process, negative regulation of transcription, DNA-templated, protein…		apoptotic process involved in morphogenesis, cellular response to gamma radiation, microtubule polymerization or depolymerization, protein folding, protein homooligomerization, stress-activated MAPK cascade, tubulin complex assembly	aging, apoptotic process involved in morphogenesis, lens development in camera-type eye, multicellular organism aging, muscle organ development						stress-activated MAPK cascade		lens development in camera-type eye, multicellular organism aging, muscle organ development				cellular response to gamma radiation, response to estradiol, response to hydrogen peroxide, response to hypoxia, stress-activated MAPK cascade			Golgi apparatus	Golgi apparatus, I band, M band, Z disc, cardiac myofibril, cytosol, mitochondrion	actin filament bundle, microtubule cytoskeleton				Golgi apparatus, I band, M band, Z disc, actin filament bundle, cardiac myofibril, microtubule cytoskeleton, mitochondrion, nucleus	synaptic membrane	mitochondrion	nucleus		I band, M band, Z disc, actin filament bundle	synaptic membrane				beta-amyloid binding, macromolecular complex binding, metal ion binding, microtubule binding, protein homodimerization activity, unfolded protein binding								beta-amyloid binding, macromolecular complex binding, metal ion binding, microtubule binding, protein homodimerization activity, structural constituent of eye lens, unfolded protein binding
Alpha-internexin OS=Rattus norvegicus OX=10116 GN=Ina PE=1 SV=1	G3V8Q2_RAT	56 kDa
Alpha-N-acetylgalactosaminidase OS=Rattus norvegicus OX=10116 GN=Naga PE=2 SV=1	NAGAB_RAT	47 kDa				glycolipid catabolic process, glycosylceramide catabolic process							carbohydrate catabolic process, glycolipid catabolic process, glycoside catabolic process, glycosylceramide catabolic process, oligosaccharide metabolic process										lysosome					lysosome										protein homodimerization activity	alpha-N-acetylgalactosaminidase activity, alpha-galactosidase activity							alpha-N-acetylgalactosaminidase activity, alpha-galactosidase activity, protein homodimerization activity
Alpha-soluble NSF attachment protein OS=Rattus norvegicus OX=10116 GN=Napa PE=1 SV=2	SNAA_RAT	33 kDa		positive regulation of ATPase activity, regulation of synaptic vesicle priming, synaptic vesicle priming		SNARE complex disassembly, macromolecular complex disassembly, membrane fusion, neuron differentiation, synaptic transmission, glutamatergic, synaptic vesicle priming	brain development, neuron differentiation	SNARE complex disassembly, intracellular protein transport, synaptic vesicle priming			SNARE complex disassembly, apical protein localization, intracellular protein transport, synaptic vesicle priming				brain development, neuron differentiation								SNARE complex, synaptobrevin 2-SNAP-25-syntaxin-1a complex, vacuolar membrane					vacuolar membrane	SNARE complex, plasma membrane, synaptobrevin 2-SNAP-25-syntaxin-1a complex, vacuolar membrane			vacuolar membrane	vacuolar membrane	plasma membrane				macromolecular complex binding, soluble NSF attachment protein activity, syntaxin binding								macromolecular complex binding, soluble NSF attachment protein activity, syntaxin binding
Alpha-synuclein OS=Rattus norvegicus OX=10116 GN=Snca PE=1 SV=1	SYUA_RAT	15 kDa		activation of cysteine-type endopeptidase activity involved in apoptotic process, excitatory postsynaptic potential, long-term synaptic potentiation, negative regulation of chaperone-mediated autophagy, negative regulation of dopamine metabolic process, negative regulation of dopamine uptake involved in synaptic transmission, negative regulation of exocytosis, negative regulation of histone acety…		SNARE complex assembly, cellular response to copper ion, cellular response to fibroblast growth factor stimulus, cellular response to oxidative stress, dopamine biosynthetic process, excitatory postsynaptic potential, fatty acid metabolic process, microglial cell activation, mitochondrial ATP synthesis coupled electron transport, mitochondrial membrane organization, neutral lipid metabolic proces…	aging	SNARE complex assembly, receptor internalization, synaptic vesicle endocytosis, synaptic vesicle priming, synaptic vesicle transport		microglial cell activation, response to interferon-gamma	SNARE complex assembly, receptor internalization, synaptic vesicle endocytosis, synaptic vesicle priming, synaptic vesicle transport		dopamine biosynthetic process, fatty acid metabolic process, mitochondrial ATP synthesis coupled electron transport, neutral lipid metabolic process, phospholipid metabolic process, receptor internalization	response to lipopolysaccharide	adult locomotory behavior, behavioral response to cocaine				behavioral response to cocaine, cellular response to copper ion, cellular response to fibroblast growth factor stimulus, cellular response to oxidative stress, excitatory postsynaptic potential, response to desipramine, response to interferon-gamma, response to interleukin-1, response to iron(II) ion, response to lipopolysaccharide, response to magnesium ion			Golgi apparatus	Golgi apparatus, cell cortex, cytosol, mitochondrial inner membrane, mitochondrial intermembrane space, mitochondrial matrix, mitochondrial outer membrane, mitochondrion, perinuclear region of cytoplasm, platelet alpha granule membrane, ribosome, rough endoplasmic reticulum, synaptic vesicle, synaptic vesicle membrane	actin cytoskeleton	rough endoplasmic reticulum		extracellular space	Golgi apparatus, actin cytoskeleton, mitochondrial inner membrane, mitochondrial intermembrane space, mitochondrial matrix, mitochondrial outer membrane, mitochondrion, nuclear outer membrane, nucleus, platelet alpha granule membrane, ribosome, rough endoplasmic reticulum, synaptic vesicle, synaptic vesicle membrane	mitochondrial inner membrane, mitochondrial outer membrane, nuclear outer membrane, plasma membrane, platelet alpha granule membrane, synaptic vesicle membrane	mitochondrial inner membrane, mitochondrial intermembrane space, mitochondrial matrix, mitochondrial outer membrane	nuclear outer membrane	mitochondrial inner membrane, mitochondrial outer membrane, nuclear outer membrane, platelet alpha granule membrane, synaptic vesicle membrane	mitochondrial inner membrane, mitochondrial intermembrane space, mitochondrial matrix, mitochondrial outer membrane, nuclear outer membrane, platelet alpha granule membrane, synaptic vesicle membrane	plasma membrane	ribosome			Hsp70 protein binding, SNARE binding, actin binding, alpha-tubulin binding, arachidonic acid binding, beta-tubulin binding, calcium ion binding, copper ion binding, cuprous ion binding, dynein complex binding, ferrous iron binding, histone binding, identical protein binding, kinesin binding, magnesium ion binding, microtubule binding, phospholipase binding, phospholipid binding, phosphoprotein bi…	oxidoreductase activity					cysteine-type endopeptidase inhibitor activity involved in apoptotic process		Hsp70 protein binding, SNARE binding, actin binding, alpha-tubulin binding, arachidonic acid binding, beta-tubulin binding, calcium ion binding, copper ion binding, cuprous ion binding, cysteine-type endopeptidase inhibitor activity involved in apoptotic process, dynein complex binding, ferrous iron binding, histone binding, identical protein binding, kinesin binding, magnesium ion binding, micro…
Aminopeptidase B OS=Rattus norvegicus OX=10116 GN=Rnpep PE=1 SV=2	AMPB_RAT	73 kDa		negative regulation of blood pressure			aging, retina development in camera-type eye						protein processing, proteolysis		negative regulation of blood pressure, retina development in camera-type eye							Golgi apparatus	Golgi apparatus, secretory granule				extracellular space	Golgi apparatus, secretory granule	external side of plasma membrane, plasma membrane					external side of plasma membrane				cobalt ion binding, copper ion binding, peptide binding, zinc ion binding	aminopeptidase activity, metalloaminopeptidase activity							aminopeptidase activity, cobalt ion binding, copper ion binding, metalloaminopeptidase activity, peptide binding, zinc ion binding
Aminopeptidase OS=Rattus norvegicus OX=10116 GN=Npepps PE=1 SV=1	F1M9V7_RAT	103 kDa
Amyloid-like protein 2 OS=Rattus norvegicus OX=10116 GN=Aplp2 PE=1 SV=2	APLP2_RAT (+2)	87 kDa																											integral component of membrane									heparin binding, transition metal ion binding						serine-type endopeptidase inhibitor activity		heparin binding, serine-type endopeptidase inhibitor activity, transition metal ion binding
Anamorsin OS=Rattus norvegicus OX=10116 GN=Ciapin1 PE=1 SV=1	CPIN1_RAT	33 kDa		negative regulation of apoptotic process		apoptotic process, iron-sulfur cluster assembly	hemopoiesis			hemopoiesis			iron-sulfur cluster assembly		hemopoiesis								mitochondrial intermembrane space					mitochondrial intermembrane space, nucleolus, nucleoplasm		mitochondrial intermembrane space	nucleolus, nucleoplasm		mitochondrial intermembrane space, nucleolus, nucleoplasm					2 iron, 2 sulfur cluster binding, 4 iron, 4 sulfur cluster binding, metal ion binding					electron carrier activity			2 iron, 2 sulfur cluster binding, 4 iron, 4 sulfur cluster binding, electron carrier activity, metal ion binding
Anaphase-promoting complex subunit CDC26 OS=Rattus norvegicus OX=10116 GN=Cdc26 PE=1 SV=1	CDC26_RAT	10 kDa		regulation of mitotic metaphase/anaphase transition		anaphase-promoting complex-dependent catabolic process, cell cycle, cell division, protein K11-linked ubiquitination							anaphase-promoting complex-dependent catabolic process, protein K11-linked ubiquitination															anaphase-promoting complex, nucleoplasm			anaphase-promoting complex, nucleoplasm		anaphase-promoting complex, nucleoplasm
Ankyrin 2 OS=Rattus norvegicus OX=10116 GN=Ank2 PE=1 SV=3	F1LM42_RAT	431 kDa
Annexin A1 OS=Rattus norvegicus OX=10116 GN=Anxa1 PE=1 SV=2	ANXA1_RAT	39 kDa		G-protein coupled receptor signaling pathway, coupled to cyclic nucleotide second messenger, cell surface receptor signaling pathway, insulin secretion, negative regulation of T-helper 2 cell differentiation, negative regulation of exocytosis, negative regulation of interleukin-8 secretion, negative regulation of phospholipase A2 activity, negative regulation of protein secretion, neutrophil clea…		DNA duplex unwinding, G-protein coupled receptor signaling pathway, coupled to cyclic nucleotide second messenger, actin cytoskeleton reorganization, alpha-beta T cell differentiation, cell surface receptor signaling pathway, cellular response to glucocorticoid stimulus, cellular response to hydrogen peroxide, cellular response to vascular endothelial growth factor stimulus, gliogenesis, granuloc…	alpha-beta T cell differentiation, endocrine pancreas development, gliogenesis, hepatocyte differentiation, keratinocyte differentiation, myoblast migration involved in skeletal muscle regeneration, prostate gland development	arachidonic acid secretion, insulin secretion, phagocytosis, prolactin secretion	myoblast migration involved in skeletal muscle regeneration	adaptive immune response, alpha-beta T cell differentiation, granulocyte chemotaxis, innate immune response, monocyte chemotaxis, neutrophil clearance	arachidonic acid secretion, granulocyte chemotaxis, insulin secretion, monocyte chemotaxis, myoblast migration involved in skeletal muscle regeneration, phagocytosis, prolactin secretion	granulocyte chemotaxis, monocyte chemotaxis, myoblast migration involved in skeletal muscle regeneration	peptide cross-linking		alpha-beta T cell differentiation, endocrine pancreas development, estrous cycle, gliogenesis, hepatocyte differentiation, keratinocyte differentiation, neutrophil clearance, prostate gland development		estrous cycle, prostate gland development	estrous cycle, prostate gland development	G-protein coupled receptor signaling pathway, coupled to cyclic nucleotide second messenger, adaptive immune response, cell surface receptor signaling pathway, cellular response to glucocorticoid stimulus, cellular response to hydrogen peroxide, cellular response to vascular endothelial growth factor stimulus, granulocyte chemotaxis, inflammatory response, innate immune response, monocyte chemota…	estrous cycle			cytoplasmic vesicle membrane, cytosol, early endosome membrane, extrinsic component of endosome membrane, mast cell granule, mitochondrial membrane	actin filament		early endosome membrane, extrinsic component of endosome membrane	extracellular exosome, extracellular space	actin filament, cytoplasmic vesicle membrane, early endosome membrane, extrinsic component of endosome membrane, mast cell granule, mitochondrial membrane, nucleoplasm, nucleus	apical plasma membrane, basolateral plasma membrane, cornified envelope, cytoplasmic vesicle membrane, early endosome membrane, extrinsic component of endosome membrane, extrinsic component of external side of plasma membrane, lateral plasma membrane, mitochondrial membrane, phagocytic cup, sarcolemma, synaptic membrane	mitochondrial membrane	nucleoplasm	cytoplasmic vesicle membrane, early endosome membrane, extrinsic component of endosome membrane, mitochondrial membrane	actin filament, cytoplasmic vesicle membrane, early endosome membrane, extrinsic component of endosome membrane, mitochondrial membrane, nucleoplasm	apical plasma membrane, basolateral plasma membrane, cornified envelope, extrinsic component of external side of plasma membrane, lateral plasma membrane, phagocytic cup, sarcolemma, synaptic membrane				DNA/DNA annealing activity, calcium ion binding, calcium-dependent phospholipid binding, calcium-dependent protein binding, protein homodimerization activity, single-stranded DNA binding						phospholipase A2 inhibitor activity		DNA/DNA annealing activity, calcium ion binding, calcium-dependent phospholipid binding, calcium-dependent protein binding, phospholipase A2 inhibitor activity, protein homodimerization activity, single-stranded DNA binding
Annexin A2 OS=Rattus norvegicus OX=10116 GN=Anxa2 PE=1 SV=2	ANXA2_RAT	39 kDa		body fluid secretion, catabolism by host of symbiont protein, fibrinolysis, negative regulation by host of symbiont molecular function, negative regulation of development of symbiont involved in interaction with host, negative regulation of low-density lipoprotein particle receptor catabolic process, positive regulation of calcium ion transport, positive regulation of chondrocyte differentiation,…		collagen fibril organization, endocardial cell differentiation, membrane budding, membrane raft assembly, osteoclast development, protein heterotetramerization, protein localization to plasma membrane	angiogenesis, biomineral tissue development, endocardial cell differentiation, growth plate cartilage development, osteoclast development	body fluid secretion, membrane budding	growth plate cartilage development	osteoclast development	body fluid secretion, membrane budding, protein localization to plasma membrane		catabolism by host of symbiont protein	catabolism by host of symbiont protein, negative regulation by host of symbiont molecular function	angiogenesis, biomineral tissue development, endocardial cell differentiation, growth plate cartilage development, osteoclast development				response to thyroid hormone				cell cortex, cytosol, early endosome, late endosome membrane, lysosomal membrane, macropinosome, melanosome, perinuclear region of cytoplasm			early endosome, late endosome membrane, macropinosome	basement membrane, extracellular exosome, extracellular space	early endosome, late endosome membrane, lipid particle, lysosomal membrane, macropinosome, melanosome, nucleus	basolateral plasma membrane, extrinsic component of plasma membrane, late endosome membrane, lysosomal membrane, membrane raft, plasma membrane, sarcolemma		nucleus	late endosome membrane, lysosomal membrane	late endosome membrane, lysosomal membrane	basolateral plasma membrane, extrinsic component of plasma membrane, sarcolemma				Rab GTPase binding, S100 protein binding, actin filament binding, bone sialoprotein binding, calcium ion binding, calcium-dependent phospholipid binding, calcium-dependent protein binding, identical protein binding, phosphatidylinositol-4,5-bisphosphate binding, phosphatidylserine binding, protease binding, virion binding						phospholipase A2 inhibitor activity		Rab GTPase binding, S100 protein binding, actin filament binding, bone sialoprotein binding, calcium channel activity, calcium ion binding, calcium-dependent phospholipid binding, calcium-dependent protein binding, identical protein binding, phosphatidylinositol-4,5-bisphosphate binding, phosphatidylserine binding, phospholipase A2 inhibitor activity, protease binding, virion binding, voltage-gat…
Annexin A3 OS=Rattus norvegicus OX=10116 GN=Anxa3 PE=1 SV=4	ANXA3_RAT	36 kDa		positive regulation of DNA metabolic process, positive regulation of angiogenesis, positive regulation of endothelial cell migration, positive regulation of sequence-specific DNA binding transcription factor activity		neutrophil degranulation	animal organ regeneration, hippocampus development	neutrophil degranulation, phagocytosis		neutrophil degranulation	neutrophil degranulation, phagocytosis			defense response to bacterium	animal organ regeneration, hippocampus development				defense response to bacterium, neutrophil degranulation, response to glucocorticoid, response to growth factor				cytosol, phagocytic vesicle membrane, specific granule					phagocytic vesicle membrane, specific granule	phagocytic vesicle membrane, plasma membrane			phagocytic vesicle membrane	phagocytic vesicle membrane	plasma membrane				calcium ion binding, calcium-dependent phospholipid binding, calcium-dependent protein binding						phospholipase A2 inhibitor activity		calcium ion binding, calcium-dependent phospholipid binding, calcium-dependent protein binding, phospholipase A2 inhibitor activity
Annexin OS=Rattus norvegicus OX=10116 GN=Anxa5 PE=1 SV=1	Q66HH8_RAT	36 kDa
Annexin OS=Rattus norvegicus OX=10116 GN=Anxa6 PE=1 SV=1	Q6IMZ3_RAT	76 kDa
Antisecretory factor OS=Rattus norvegicus OX=10116 GN=Psmd4 PE=1 SV=1	O88321_RAT	41 kDa
AP-2 complex subunit beta OS=Rattus norvegicus OX=10116 GN=Ap2b1 PE=1 SV=1	AP2B1_RAT	105 kDa		negative regulation of neuron death, positive regulation of endocytosis, positive regulation of protein localization to membrane, postsynaptic neurotransmitter receptor internalization		clathrin coat assembly, postsynaptic neurotransmitter receptor internalization	aorta development, coronary vasculature development, ventricular septum development	clathrin-dependent endocytosis, intracellular protein transport, postsynaptic neurotransmitter receptor internalization			clathrin-dependent endocytosis, intracellular protein transport, postsynaptic neurotransmitter receptor internalization		postsynaptic neurotransmitter receptor internalization		aorta development, coronary vasculature development, ventricular septum development								AP-2 adaptor complex, clathrin coat					AP-2 adaptor complex	AP-2 adaptor complex, clathrin coat			AP-2 adaptor complex	AP-2 adaptor complex	AP-2 adaptor complex				clathrin binding, macromolecular complex binding								clathrin binding, macromolecular complex binding
AP-2 complex subunit mu OS=Rattus norvegicus OX=10116 GN=Ap2m1 PE=1 SV=1	A0A140TAH5_RAT (+1)	50 kDa
AP2-associated protein kinase 1 OS=Rattus norvegicus OX=10116 GN=Aak1 PE=1 SV=1	AAK1_RAT (+1)	104 kDa		positive regulation of Notch signaling pathway, protein stabilization, regulation of clathrin-dependent endocytosis, regulation of protein localization		protein autophosphorylation		endocytosis			endocytosis		protein autophosphorylation										clathrin complex					nucleus	clathrin complex, clathrin-coated pit, extrinsic component of plasma membrane		nucleus			extrinsic component of plasma membrane				AP-2 adaptor complex binding, ATP binding, Notch binding	protein serine/threonine kinase activity							AP-2 adaptor complex binding, ATP binding, Notch binding, protein serine/threonine kinase activity
Api5 protein OS=Rattus norvegicus OX=10116 GN=Api5 PE=1 SV=1	B1WC49_RAT	57 kDa
Apolipoprotein A-I OS=Rattus norvegicus OX=10116 GN=Apoa1 PE=1 SV=2	APOA1_RAT	30 kDa		G-protein coupled receptor signaling pathway, cholesterol homeostasis, high-density lipoprotein particle assembly, high-density lipoprotein particle remodeling, integrin-mediated signaling pathway, negative regulation of cell adhesion molecule production, negative regulation of cytokine secretion involved in immune response, negative regulation of heterotypic cell-cell adhesion, negative regulati…		G-protein coupled receptor signaling pathway, high-density lipoprotein particle assembly, high-density lipoprotein particle remodeling, integrin-mediated signaling pathway, peptidyl-methionine modification, peripheral nervous system axon regeneration, phosphatidylcholine biosynthetic process, protein oxidation, very-low-density lipoprotein particle remodeling	animal organ regeneration, peripheral nervous system axon regeneration	cholesterol efflux, cholesterol import, cholesterol transport, phospholipid efflux, phospholipid transport, reverse cholesterol transport, vitamin transport			cholesterol efflux, cholesterol import, cholesterol transport, phospholipid efflux, phospholipid transport, reverse cholesterol transport, vitamin transport		cholesterol biosynthetic process, lipoprotein metabolic process, peptidyl-methionine modification, phosphatidylcholine biosynthetic process, protein oxidation		animal organ regeneration, high-density lipoprotein particle assembly, high-density lipoprotein particle remodeling, peripheral nervous system axon regeneration, very-low-density lipoprotein particle remodeling				G-protein coupled receptor signaling pathway, integrin-mediated signaling pathway, peripheral nervous system axon regeneration, response to drug, response to estrogen, response to nutrient				endocytic vesicle				chylomicron, discoidal high-density lipoprotein particle, extracellular space, intermediate-density lipoprotein particle, low-density lipoprotein particle, spherical high-density lipoprotein particle, very-low-density lipoprotein particle	endocytic vesicle, nucleus			nucleus							apolipoprotein A-I receptor binding, beta-amyloid binding, cholesterol binding, enzyme binding, heat shock protein binding, high-density lipoprotein particle receptor binding, identical protein binding, phosphatidylcholine binding				chemorepellent activity		lipase inhibitor activity, phosphatidylcholine-sterol O-acyltransferase activator activity		apolipoprotein A-I receptor binding, beta-amyloid binding, chemorepellent activity, cholesterol binding, enzyme binding, heat shock protein binding, high-density lipoprotein particle receptor binding, identical protein binding, lipase inhibitor activity, phosphatidylcholine binding, phosphatidylcholine-sterol O-acyltransferase activator activity, phospholipid transporter activity
Apolipoprotein A-IV OS=Rattus norvegicus OX=10116 GN=Apoa4 PE=1 SV=2	APOA4_RAT	44 kDa		cholesterol homeostasis, high-density lipoprotein particle assembly, positive regulation of cholesterol esterification, positive regulation of fatty acid biosynthetic process, positive regulation of lipoprotein lipase activity, positive regulation of triglyceride catabolic process, regulation of intestinal cholesterol absorption, triglyceride homeostasis, very-low-density lipoprotein particle rem…		high-density lipoprotein particle assembly, peripheral nervous system axon regeneration, phosphatidylcholine metabolic process, very-low-density lipoprotein particle remodeling	peripheral nervous system axon regeneration	cholesterol efflux, phospholipid efflux, reverse cholesterol transport			cholesterol efflux, phospholipid efflux, reverse cholesterol transport		cholesterol biosynthetic process, lipoprotein metabolic process, phosphatidylcholine metabolic process		high-density lipoprotein particle assembly, peripheral nervous system axon regeneration, very-low-density lipoprotein particle remodeling				peripheral nervous system axon regeneration, response to food, response to triglyceride								chylomicron, high-density lipoprotein particle											cholesterol binding, phosphatidylcholine binding						phosphatidylcholine-sterol O-acyltransferase activator activity		cholesterol binding, phosphatidylcholine binding, phosphatidylcholine-sterol O-acyltransferase activator activity
Apolipoprotein E OS=Rattus norvegicus OX=10116 GN=Apoe PE=1 SV=1	A0A0G2K151_RAT (+1)	41 kDa
Apoptotic chromatin condensation inducer 1 OS=Rattus norvegicus OX=10116 GN=Acin1 PE=1 SV=1	E9PST5_RAT	151 kDa
Arf-GAP domain and FG repeat-containing protein 1 OS=Rattus norvegicus OX=10116 GN=Agfg1 PE=1 SV=1	AGFG1_RAT (+1)	58 kDa				cell differentiation	cell differentiation, multicellular organism development							spermatogenesis	multicellular organism development, spermatogenesis		spermatogenesis	spermatogenesis					cytoplasmic vesicle					cytoplasmic vesicle, nucleus			nucleus							DNA binding, metal ion binding						GTPase activator activity		DNA binding, GTPase activator activity, metal ion binding
Argininosuccinate synthase OS=Rattus norvegicus OX=10116 GN=Ass1 PE=1 SV=1	ASSY_RAT	46 kDa		negative regulation of leukocyte cell-cell adhesion, positive regulation of nitric oxide biosynthetic process		arginine biosynthetic process, argininosuccinate metabolic process, aspartate metabolic process, cellular response to amine stimulus, cellular response to amino acid stimulus, cellular response to ammonium ion, cellular response to cAMP, cellular response to dexamethasone stimulus, cellular response to glucagon stimulus, cellular response to interferon-gamma, cellular response to laminar fluid sh…	aging, diaphragm development, kidney development, liver development, midgut development			cellular response to interferon-gamma			arginine biosynthetic process, argininosuccinate metabolic process, aspartate metabolic process, citrulline metabolic process, urea cycle	cellular response to lipopolysaccharide	diaphragm development, kidney development, liver development, midgut development				acute-phase response, cellular response to amine stimulus, cellular response to amino acid stimulus, cellular response to ammonium ion, cellular response to cAMP, cellular response to dexamethasone stimulus, cellular response to glucagon stimulus, cellular response to interferon-gamma, cellular response to laminar fluid shear stress, cellular response to lipopolysaccharide, cellular response to o…	circadian rhythm			cytoplasm, cytosol, endoplasmic reticulum, lysosome, mitochondrial outer membrane		endoplasmic reticulum			endoplasmic reticulum, lysosome, mitochondrial outer membrane, nucleus	mitochondrial outer membrane	mitochondrial outer membrane	nucleus	mitochondrial outer membrane	mitochondrial outer membrane					ATP binding, amino acid binding, identical protein binding, toxic substance binding	argininosuccinate synthase activity							ATP binding, amino acid binding, argininosuccinate synthase activity, identical protein binding, toxic substance binding
ARP1 actin-related protein 1 homolog B (Yeast) OS=Rattus norvegicus OX=10116 GN=Actr1b PE=1 SV=1	B2RYJ7_RAT	42 kDa
Aryl-hydrocarbon-interacting protein-like 1 OS=Rattus norvegicus OX=10116 GN=Aipl1 PE=2 SV=1	AIPL1_RAT	38 kDa		negative regulation of apoptotic process, phototransduction, visible light, regulation of rhodopsin mediated signaling pathway, retina homeostasis		phototransduction, visible light, protein farnesylation							protein farnesylation		retina homeostasis, visual perception				phototransduction, visible light				cytosol					nucleoplasm			nucleoplasm		nucleoplasm					farnesylated protein binding	peptidyl-prolyl cis-trans isomerase activity							farnesylated protein binding, peptidyl-prolyl cis-trans isomerase activity
Asparaginyl-tRNA synthetase OS=Rattus norvegicus OX=10116 GN=Nars PE=1 SV=2	F1LPV0_RAT	64 kDa
Aspartate aminotransferase, cytoplasmic OS=Rattus norvegicus OX=10116 GN=Got1 PE=1 SV=3	AATC_RAT	46 kDa		Notch signaling pathway, fatty acid homeostasis, negative regulation of collagen biosynthetic process, negative regulation of cytosolic calcium ion concentration, negative regulation of mitochondrial depolarization, positive regulation of transforming growth factor beta receptor signaling pathway		Notch signaling pathway, aspartate biosynthetic process, aspartate catabolic process, aspartate metabolic process, cellular response to insulin stimulus, cellular response to mechanical stimulus, dicarboxylic acid metabolic process, glutamate catabolic process to 2-oxoglutarate, glutamate catabolic process to aspartate, glutamate metabolic process, glycerol biosynthetic process, negative regulati…	transdifferentiation						aspartate biosynthetic process, aspartate catabolic process, aspartate metabolic process, dicarboxylic acid metabolic process, glutamate catabolic process to 2-oxoglutarate, glutamate catabolic process to aspartate, glutamate metabolic process, glycerol biosynthetic process, oxaloacetate metabolic process						Notch signaling pathway, cellular response to insulin stimulus, cellular response to mechanical stimulus, response to cadmium ion, response to carbohydrate, response to glucocorticoid, response to immobilization stress, response to transition metal nanoparticle				cytosol, lysosome					lysosome, nucleoplasm			nucleoplasm		nucleoplasm					carboxylic acid binding, pyridoxal phosphate binding	L-aspartate:2-oxoglutarate aminotransferase activity, L-cysteine:2-oxoglutarate aminotransferase activity, phosphatidylserine decarboxylase activity							L-aspartate:2-oxoglutarate aminotransferase activity, L-cysteine:2-oxoglutarate aminotransferase activity, carboxylic acid binding, phosphatidylserine decarboxylase activity, pyridoxal phosphate binding
Aspartate aminotransferase, mitochondrial OS=Rattus norvegicus OX=10116 GN=Got2 PE=1 SV=2	AATM_RAT	47 kDa		lactation		aspartate biosynthetic process, aspartate catabolic process, dicarboxylic acid metabolic process, glutamate catabolic process to 2-oxoglutarate, glutamate catabolic process to aspartate, glutamate metabolic process, oxaloacetate metabolic process	lactation	fatty acid transport, lactation			fatty acid transport, lactation		aspartate biosynthetic process, aspartate catabolic process, dicarboxylic acid metabolic process, glutamate catabolic process to 2-oxoglutarate, glutamate catabolic process to aspartate, glutamate metabolic process, oxaloacetate metabolic process	female pregnancy	female pregnancy, lactation		female pregnancy	female pregnancy	response to ethanol, response to insulin, response to morphine, response to muscle activity				mitochondrial inner membrane, mitochondrial matrix, mitochondrion					mitochondrial inner membrane, mitochondrial matrix, mitochondrion	T-tubule, mitochondrial inner membrane, sarcolemma	mitochondrial inner membrane, mitochondrial matrix		mitochondrial inner membrane	mitochondrial inner membrane, mitochondrial matrix	T-tubule, sarcolemma				amino acid binding, carboxylic acid binding, enzyme binding, phospholipid binding, protein homodimerization activity, pyridoxal phosphate binding	L-aspartate:2-oxoglutarate aminotransferase activity, kynurenine-oxoglutarate transaminase activity							L-aspartate:2-oxoglutarate aminotransferase activity, amino acid binding, carboxylic acid binding, enzyme binding, kynurenine-oxoglutarate transaminase activity, phospholipid binding, protein homodimerization activity, pyridoxal phosphate binding
Aspartyl aminopeptidase OS=Rattus norvegicus OX=10116 GN=Dnpep PE=1 SV=1	Q4V8H5_RAT	53 kDa
Astrocytic phosphoprotein PEA-15 OS=Rattus norvegicus OX=10116 GN=Pea15 PE=1 SV=1	PEA15_RAT	15 kDa		DNA damage checkpoint, negative regulation of extrinsic apoptotic signaling pathway via death domain receptors, negative regulation of glucose import, positive regulation of extrinsic apoptotic signaling pathway via death domain receptors		DNA damage checkpoint, apoptotic process		carbohydrate transport			carbohydrate transport								DNA damage checkpoint, response to morphine				cytosol					nucleus			nucleus
ATP synthase F(0) complex subunit B1, mitochondrial OS=Rattus norvegicus OX=10116 GN=Atp5pb PE=1 SV=1	AT5F1_RAT	29 kDa				ATP metabolic process, ATP synthesis coupled proton transport, cellular response to hypoxia		ATP synthesis coupled proton transport			ATP synthesis coupled proton transport		ATP metabolic process, ATP synthesis coupled proton transport						cellular response to hypoxia				mitochondrial proton-transporting ATP synthase complex, mitochondrial proton-transporting ATP synthase complex, coupling factor F(o)					mitochondrial proton-transporting ATP synthase complex, mitochondrial proton-transporting ATP synthase complex, coupling factor F(o)	mitochondrial proton-transporting ATP synthase complex, mitochondrial proton-transporting ATP synthase complex, coupling factor F(o)	mitochondrial proton-transporting ATP synthase complex, mitochondrial proton-transporting ATP synthase complex, coupling factor F(o)		mitochondrial proton-transporting ATP synthase complex, mitochondrial proton-transporting ATP synthase complex, coupling factor F(o)	mitochondrial proton-transporting ATP synthase complex, mitochondrial proton-transporting ATP synthase complex, coupling factor F(o)					macromolecular complex binding								hydrogen ion transmembrane transporter activity, macromolecular complex binding
ATP synthase subunit alpha, mitochondrial OS=Rattus norvegicus OX=10116 GN=Atp5f1a PE=1 SV=2	ATPA_RAT	60 kDa				ATP metabolic process, ATP synthesis coupled proton transport, apoptotic process, cellular response to dexamethasone stimulus, cellular response to nitric oxide	aging	ATP synthesis coupled proton transport			ATP synthesis coupled proton transport		ATP metabolic process, ATP synthesis coupled proton transport						cellular response to dexamethasone stimulus, cellular response to nitric oxide, response to ethanol, response to muscle activity				mitochondrial inner membrane, mitochondrial proton-transporting ATP synthase complex, mitochondrial proton-transporting ATP synthase complex, catalytic core F(1), mitochondrion					mitochondrial inner membrane, mitochondrial proton-transporting ATP synthase complex, mitochondrial proton-transporting ATP synthase complex, catalytic core F(1), mitochondrion, nucleus	membrane raft, mitochondrial inner membrane, mitochondrial proton-transporting ATP synthase complex, mitochondrial proton-transporting ATP synthase complex, catalytic core F(1), plasma membrane	mitochondrial inner membrane, mitochondrial proton-transporting ATP synthase complex, mitochondrial proton-transporting ATP synthase complex, catalytic core F(1)	nucleus	mitochondrial inner membrane, mitochondrial proton-transporting ATP synthase complex, mitochondrial proton-transporting ATP synthase complex, catalytic core F(1)	mitochondrial inner membrane, mitochondrial proton-transporting ATP synthase complex, mitochondrial proton-transporting ATP synthase complex, catalytic core F(1)	plasma membrane				ADP binding, ATP binding, protease binding	proton-transporting ATP synthase activity, rotational mechanism							ADP binding, ATP binding, protease binding, proton-transporting ATP synthase activity, rotational mechanism
ATP synthase subunit beta, mitochondrial OS=Rattus norvegicus OX=10116 GN=Atp5f1b PE=1 SV=2	ATPB_RAT	56 kDa				ATP metabolic process, cellular response to peptide, mitochondrial ATP synthesis coupled proton transport	liver development	mitochondrial ATP synthesis coupled proton transport, receptor-mediated endocytosis			mitochondrial ATP synthesis coupled proton transport, receptor-mediated endocytosis		ATP metabolic process, mitochondrial ATP synthesis coupled proton transport		liver development				cellular response to peptide, cold acclimation, response to 3,3',5-triiodo-L-thyronine, response to curcumin, response to manganese ion				mitochondrial inner membrane, mitochondrial proton-transporting ATP synthase complex, mitochondrial proton-transporting ATP synthase complex, catalytic core F(1), mitochondrion					mitochondrial inner membrane, mitochondrial proton-transporting ATP synthase complex, mitochondrial proton-transporting ATP synthase complex, catalytic core F(1), mitochondrion	membrane raft, mitochondrial inner membrane, mitochondrial proton-transporting ATP synthase complex, mitochondrial proton-transporting ATP synthase complex, catalytic core F(1)	mitochondrial inner membrane, mitochondrial proton-transporting ATP synthase complex, mitochondrial proton-transporting ATP synthase complex, catalytic core F(1)		mitochondrial inner membrane, mitochondrial proton-transporting ATP synthase complex, mitochondrial proton-transporting ATP synthase complex, catalytic core F(1)	mitochondrial inner membrane, mitochondrial proton-transporting ATP synthase complex, mitochondrial proton-transporting ATP synthase complex, catalytic core F(1)					ADP binding, ATP binding, calcium ion binding	ATPase activity, proton-transporting ATP synthase activity, rotational mechanism							ADP binding, ATP binding, ATPase activity, calcium ion binding, lipoprotein particle receptor activity, proton-transporting ATP synthase activity, rotational mechanism	lipoprotein particle receptor activity
ATP synthase subunit d, mitochondrial OS=Rattus norvegicus OX=10116 GN=Atp5pd PE=1 SV=3	ATP5H_RAT	19 kDa				ATP metabolic process, ATP synthesis coupled proton transport, cellular response to peptide		ATP synthesis coupled proton transport			ATP synthesis coupled proton transport		ATP metabolic process, ATP synthesis coupled proton transport						cellular response to peptide				mitochondrial proton-transporting ATP synthase complex, mitochondrial proton-transporting ATP synthase complex, coupling factor F(o), mitochondrial proton-transporting ATP synthase, stator stalk, mitochondrion					mitochondrial proton-transporting ATP synthase complex, mitochondrial proton-transporting ATP synthase complex, coupling factor F(o), mitochondrial proton-transporting ATP synthase, stator stalk, mitochondrion, nucleoplasm	mitochondrial proton-transporting ATP synthase complex, mitochondrial proton-transporting ATP synthase complex, coupling factor F(o), mitochondrial proton-transporting ATP synthase, stator stalk	mitochondrial proton-transporting ATP synthase complex, mitochondrial proton-transporting ATP synthase complex, coupling factor F(o), mitochondrial proton-transporting ATP synthase, stator stalk	nucleoplasm	mitochondrial proton-transporting ATP synthase complex, mitochondrial proton-transporting ATP synthase complex, coupling factor F(o), mitochondrial proton-transporting ATP synthase, stator stalk	mitochondrial proton-transporting ATP synthase complex, mitochondrial proton-transporting ATP synthase complex, coupling factor F(o), mitochondrial proton-transporting ATP synthase, stator stalk, nucleoplasm					macromolecular complex binding	ATPase activity							ATPase activity, hydrogen ion transmembrane transporter activity, macromolecular complex binding
ATP synthase subunit delta, mitochondrial OS=Rattus norvegicus OX=10116 GN=Atp5f1d PE=1 SV=1	G3V7Y3_RAT	18 kDa
ATP synthase subunit e, mitochondrial OS=Rattus norvegicus OX=10116 GN=Atp5me PE=1 SV=3	ATP5I_RAT	8 kDa				ATP metabolic process, ATP synthesis coupled proton transport		ATP synthesis coupled proton transport			ATP synthesis coupled proton transport		ATP metabolic process, ATP synthesis coupled proton transport										mitochondrial proton-transporting ATP synthase complex, mitochondrial proton-transporting ATP synthase complex, coupling factor F(o), mitochondrion					mitochondrial proton-transporting ATP synthase complex, mitochondrial proton-transporting ATP synthase complex, coupling factor F(o), mitochondrion	mitochondrial proton-transporting ATP synthase complex, mitochondrial proton-transporting ATP synthase complex, coupling factor F(o)	mitochondrial proton-transporting ATP synthase complex, mitochondrial proton-transporting ATP synthase complex, coupling factor F(o), mitochondrion		mitochondrial proton-transporting ATP synthase complex, mitochondrial proton-transporting ATP synthase complex, coupling factor F(o)	mitochondrial proton-transporting ATP synthase complex, mitochondrial proton-transporting ATP synthase complex, coupling factor F(o)					macromolecular complex binding	ATPase activity							ATPase activity, hydrogen ion transmembrane transporter activity, macromolecular complex binding
ATP synthase subunit g, mitochondrial OS=Rattus norvegicus OX=10116 GN=Atp5mg PE=1 SV=2	ATP5L_RAT	11 kDa				ATP metabolic process, ATP synthesis coupled proton transport		ATP synthesis coupled proton transport			ATP synthesis coupled proton transport		ATP metabolic process, ATP synthesis coupled proton transport										mitochondrial proton-transporting ATP synthase complex, mitochondrial proton-transporting ATP synthase complex, coupling factor F(o)					mitochondrial proton-transporting ATP synthase complex, mitochondrial proton-transporting ATP synthase complex, coupling factor F(o)	mitochondrial proton-transporting ATP synthase complex, mitochondrial proton-transporting ATP synthase complex, coupling factor F(o)	mitochondrial proton-transporting ATP synthase complex, mitochondrial proton-transporting ATP synthase complex, coupling factor F(o)		mitochondrial proton-transporting ATP synthase complex, mitochondrial proton-transporting ATP synthase complex, coupling factor F(o)	mitochondrial proton-transporting ATP synthase complex, mitochondrial proton-transporting ATP synthase complex, coupling factor F(o)													hydrogen ion transmembrane transporter activity
ATP synthase subunit O, mitochondrial OS=Rattus norvegicus OX=10116 GN=Atp5po PE=1 SV=1	ATPO_RAT	23 kDa				ATP metabolic process, ATP synthesis coupled proton transport, cellular response to cAMP, cellular response to cytokine stimulus		ATP synthesis coupled proton transport			ATP synthesis coupled proton transport		ATP metabolic process, ATP synthesis coupled proton transport						cellular response to cAMP, cellular response to cytokine stimulus				mitochondrial proton-transporting ATP synthase complex, mitochondrial proton-transporting ATP synthase complex, coupling factor F(o), mitochondrion					mitochondrial proton-transporting ATP synthase complex, mitochondrial proton-transporting ATP synthase complex, coupling factor F(o), mitochondrion	mitochondrial proton-transporting ATP synthase complex, mitochondrial proton-transporting ATP synthase complex, coupling factor F(o), plasma membrane	mitochondrial proton-transporting ATP synthase complex, mitochondrial proton-transporting ATP synthase complex, coupling factor F(o)		mitochondrial proton-transporting ATP synthase complex, mitochondrial proton-transporting ATP synthase complex, coupling factor F(o)	mitochondrial proton-transporting ATP synthase complex, mitochondrial proton-transporting ATP synthase complex, coupling factor F(o)	plasma membrane				estradiol binding, macromolecular complex binding	proton-transporting ATP synthase activity, rotational mechanism							estradiol binding, macromolecular complex binding, proton-transporting ATP synthase activity, rotational mechanism
ATP synthase-coupling factor 6, mitochondrial OS=Rattus norvegicus OX=10116 GN=Atp5pf PE=1 SV=1	ATP5J_RAT	12 kDa		negative regulation of arachidonic acid secretion, negative regulation of prostaglandin secretion, positive regulation of blood pressure, positive regulation of heart rate		ATP metabolic process, ATP synthesis coupled proton transport		ATP synthesis coupled proton transport			ATP synthesis coupled proton transport		ATP metabolic process, ATP synthesis coupled proton transport		positive regulation of blood pressure				response to muscle activity				mitochondrial proton-transporting ATP synthase complex, mitochondrial proton-transporting ATP synthase complex, coupling factor F(o), mitochondrion				extracellular space	mitochondrial proton-transporting ATP synthase complex, mitochondrial proton-transporting ATP synthase complex, coupling factor F(o), mitochondrion	mitochondrial proton-transporting ATP synthase complex, mitochondrial proton-transporting ATP synthase complex, coupling factor F(o)	mitochondrial proton-transporting ATP synthase complex, mitochondrial proton-transporting ATP synthase complex, coupling factor F(o)		mitochondrial proton-transporting ATP synthase complex, mitochondrial proton-transporting ATP synthase complex, coupling factor F(o)	mitochondrial proton-transporting ATP synthase complex, mitochondrial proton-transporting ATP synthase complex, coupling factor F(o)					macromolecular complex binding	ATPase activity							ATPase activity, hydrogen ion transmembrane transporter activity, macromolecular complex binding
ATPase Asna1 OS=Rattus norvegicus OX=10116 GN=Asna1 PE=1 SV=1	G3V9T7_RAT	39 kDa
ATPase H+-transporting V1 subunit A OS=Rattus norvegicus OX=10116 GN=Atp6v1a PE=1 SV=1	D4A133_RAT	68 kDa
ATPase inhibitor, mitochondrial OS=Rattus norvegicus OX=10116 GN=Atp5if1 PE=3 SV=2	ATIF1_RAT	12 kDa		erythrocyte differentiation, mitochondrial depolarization, negative regulation of ATPase activity, negative regulation of endothelial cell proliferation, negative regulation of hydrolase activity, positive regulation of mitochondrial outer membrane permeabilization involved in apoptotic signaling pathway, positive regulation of mitophagy in response to mitochondrial depolarization, positive regul…		erythrocyte differentiation, heme biosynthetic process, positive regulation of mitochondrial outer membrane permeabilization involved in apoptotic signaling pathway, positive regulation of mitophagy in response to mitochondrial depolarization, protein homooligomerization, protein homotetramerization, reactive oxygen species metabolic process	erythrocyte differentiation	positive regulation of mitochondrial outer membrane permeabilization involved in apoptotic signaling pathway		erythrocyte differentiation	positive regulation of mitochondrial outer membrane permeabilization involved in apoptotic signaling pathway		heme biosynthetic process, reactive oxygen species metabolic process		erythrocyte differentiation				positive regulation of mitophagy in response to mitochondrial depolarization				mitochondrion					mitochondrion		mitochondrion								ATPase binding, angiostatin binding, calmodulin binding, protein homodimerization activity						ATPase inhibitor activity		ATPase binding, ATPase inhibitor activity, angiostatin binding, calmodulin binding, protein homodimerization activity
ATP-binding cassette subfamily A member 4 OS=Rattus norvegicus OX=10116 GN=Abca4 PE=4 SV=2	D4AB29_RAT	259 kDa
ATP-citrate synthase OS=Rattus norvegicus OX=10116 GN=Acly PE=1 SV=1	A0A0G2K5E7_RAT (+2)	121 kDa
ATP-dependent 6-phosphofructokinase, liver type OS=Rattus norvegicus OX=10116 GN=Pfkl PE=1 SV=3	PFKAL_RAT	85 kDa		negative regulation of insulin secretion		canonical glycolysis, fructose 1,6-bisphosphate metabolic process, fructose 6-phosphate metabolic process, glycolytic process, protein homotetramerization							canonical glycolysis, carbohydrate metabolic process, fructose 1,6-bisphosphate metabolic process, fructose 6-phosphate metabolic process, glucose catabolic process, glycolytic process						response to glucose				6-phosphofructokinase complex, cytosol						membrane									AMP binding, ATP binding, fructose binding, fructose-6-phosphate binding, identical protein binding, kinase binding, metal ion binding, monosaccharide binding	6-phosphofructokinase activity, fructose-2,6-bisphosphate 2-phosphatase activity							6-phosphofructokinase activity, AMP binding, ATP binding, fructose binding, fructose-2,6-bisphosphate 2-phosphatase activity, fructose-6-phosphate binding, identical protein binding, kinase binding, metal ion binding, monosaccharide binding
ATP-dependent 6-phosphofructokinase, platelet type OS=Rattus norvegicus OX=10116 GN=Pfkp PE=1 SV=2	PFKAP_RAT	86 kDa				canonical glycolysis, fructose 1,6-bisphosphate metabolic process, fructose 6-phosphate metabolic process, glycolytic process, protein homotetramerization							canonical glycolysis, fructose 1,6-bisphosphate metabolic process, fructose 6-phosphate metabolic process, glucose catabolic process, glycolytic process										6-phosphofructokinase complex						membrane									AMP binding, ATP binding, fructose-6-phosphate binding, identical protein binding, metal ion binding, monosaccharide binding	6-phosphofructokinase activity							6-phosphofructokinase activity, AMP binding, ATP binding, fructose-6-phosphate binding, identical protein binding, metal ion binding, monosaccharide binding
ATP-dependent RNA helicase DDX1 OS=Rattus norvegicus OX=10116 GN=Ddx1 PE=1 SV=1	DDX1_RAT	82 kDa		positive regulation of I-kappaB kinase/NF-kappaB signaling, positive regulation of myeloid dendritic cell cytokine production		DNA duplex unwinding, defense response to virus, double-strand break repair, mRNA processing, tRNA splicing, via endonucleolytic cleavage and ligation	multicellular organism development			defense response to virus, innate immune response	protein localization to cytoplasmic stress granule		double-strand break repair, mRNA processing, tRNA splicing, via endonucleolytic cleavage and ligation	defense response to virus	multicellular organism development				defense response to virus, double-strand break repair, innate immune response, response to exogenous dsRNA		defense response to virus		cytoplasmic stress granule, cytosol, mitochondrion					cleavage body, cytoplasmic stress granule, mitochondrion, nucleus		mitochondrion	cleavage body		cleavage body					ATP binding, DNA binding, chromatin binding, double-stranded RNA binding, poly(A) binding	DNA/RNA helicase activity, RNA helicase activity, exonuclease activity							ATP binding, DNA binding, DNA/RNA helicase activity, RNA helicase activity, chromatin binding, double-stranded RNA binding, exonuclease activity, poly(A) binding, transcription cofactor activity
Bardet-Biedl syndrome 1 OS=Rattus norvegicus OX=10116 GN=Bbs1 PE=4 SV=1	D4A4U2_RAT	65 kDa
Bardet-Biedl syndrome 2 protein homolog OS=Rattus norvegicus OX=10116 GN=Bbs2 PE=2 SV=1	BBS2_RAT	80 kDa		artery smooth muscle contraction, negative regulation of appetite by leptin-mediated signaling pathway, negative regulation of gene expression, negative regulation of multicellular organism growth, photoreceptor cell maintenance, positive regulation of multicellular organism growth, regulation of cilium beat frequency involved in ciliary motility, vasodilation		Golgi to plasma membrane protein transport, fat cell differentiation, negative regulation of appetite by leptin-mediated signaling pathway, non-motile cilium assembly, sperm axoneme assembly	brain morphogenesis, cartilage development, cerebral cortex development, fat cell differentiation, hippocampus development, sperm axoneme assembly, striatum development	Golgi to plasma membrane protein transport			Golgi to plasma membrane protein transport, protein localization to organelle, sperm axoneme assembly	sperm axoneme assembly		sperm axoneme assembly	adult behavior, artery smooth muscle contraction, brain morphogenesis, cartilage development, cerebral cortex development, hippocampus development, photoreceptor cell maintenance, sperm axoneme assembly, striatum development, vasodilation, visual perception		sperm axoneme assembly	sperm axoneme assembly	negative regulation of appetite by leptin-mediated signaling pathway				cytoplasm	ciliary basal body				ciliary basal body	ciliary membrane			ciliary membrane	BBSome, ciliary basal body, ciliary membrane, stereocilium	ciliary membrane				RNA polymerase II repressing transcription factor binding								RNA polymerase II repressing transcription factor binding
Basigin OS=Rattus norvegicus OX=10116 GN=Bsg PE=1 SV=2	BASI_RAT	42 kDa	homophilic cell adhesion via plasma membrane adhesion molecules			axon guidance, dendrite self-avoidance, protein localization to plasma membrane	axon guidance, decidualization, dendrite self-avoidance, embryo implantation, odontogenesis of dentin-containing tooth				protein localization to plasma membrane	axon guidance		decidualization, embryo implantation	axon guidance, decidualization, dendrite self-avoidance, embryo implantation, odontogenesis of dentin-containing tooth		decidualization, embryo implantation	decidualization, embryo implantation	axon guidance, response to cAMP, response to mercury ion, response to peptide hormone				acrosomal membrane, melanosome, mitochondrion					acrosomal membrane, melanosome, mitochondrion	acrosomal membrane, integral component of plasma membrane, membrane raft, plasma membrane, sarcolemma	mitochondrion		acrosomal membrane	acrosomal membrane	integral component of plasma membrane, sarcolemma				mannose binding, protein binding involved in cell-cell adhesion								mannose binding, protein binding involved in cell-cell adhesion
BCAS2, pre-mRNA-processing factor OS=Rattus norvegicus OX=10116 GN=Bcas2 PE=1 SV=1	B5DFM8_RAT	26 kDa
BCL2-associated transcription factor 1, isoform CRA_a OS=Rattus norvegicus OX=10116 GN=Bclaf1 PE=1 SV=1	B1WC16_RAT	106 kDa
BetaA2-crystallin OS=Rattus norvegicus OX=10116 GN=Cryba2 PE=2 SV=1	Q8CGQ0_RAT	22 kDa
Beta-adducin OS=Rattus norvegicus OX=10116 GN=Add2 PE=1 SV=4	ADDB_RAT (+1)	81 kDa		barbed-end actin filament capping		actin filament bundle assembly, barbed-end actin filament capping, macromolecular complex assembly		ion transport			ion transport												cytoplasmic vesicle	cytoskeleton				cytoplasmic vesicle, cytoskeleton	plasma membrane raft					plasma membrane raft				actin filament binding, calmodulin binding, spectrin binding								actin filament binding, calmodulin binding, spectrin binding, structural constituent of cytoskeleton
Beta-arrestin-1 OS=Rattus norvegicus OX=10116 GN=Arrb1 PE=1 SV=1	ARRB1_RAT	47 kDa		G-protein coupled receptor internalization, activation of MAPK activity, adenylate cyclase-modulating G-protein coupled receptor signaling pathway, follicle-stimulating hormone signaling pathway, negative regulation of ERK1 and ERK2 cascade, negative regulation of GTPase activity, negative regulation of NF-kappaB transcription factor activity, negative regulation of Notch signaling pathway, negat…		G-protein coupled receptor internalization, adenylate cyclase-modulating G-protein coupled receptor signaling pathway, follicle-stimulating hormone signaling pathway, phototransduction, proteasome-mediated ubiquitin-dependent protein catabolic process, protein ubiquitination, stress fiber assembly, transcription from RNA polymerase II promoter, ubiquitin-dependent protein catabolic process	follicle-stimulating hormone signaling pathway	G-protein coupled receptor internalization, protein transport			G-protein coupled receptor internalization, protein transport		G-protein coupled receptor internalization, proteasome-mediated ubiquitin-dependent protein catabolic process, protein ubiquitination, transcription from RNA polymerase II promoter, ubiquitin-dependent protein catabolic process		follicle-stimulating hormone signaling pathway, sensory perception of pain, sensory perception of touch		follicle-stimulating hormone signaling pathway	follicle-stimulating hormone signaling pathway	adenylate cyclase-modulating G-protein coupled receptor signaling pathway, follicle-stimulating hormone signaling pathway, phototransduction, response to drug	follicle-stimulating hormone signaling pathway			cytoplasmic vesicle, cytosol, endosome			endosome		chromatin, cytoplasmic vesicle, endosome, nuclear body, nucleus	basolateral plasma membrane, clathrin-coated pit, plasma membrane, postsynaptic membrane		nuclear body		chromatin, nuclear body	basolateral plasma membrane, postsynaptic membrane				AP-2 adaptor complex binding, G-protein coupled receptor binding, V2 vasopressin receptor binding, alpha-1A adrenergic receptor binding, alpha-1B adrenergic receptor binding, angiotensin receptor binding, arrestin family protein binding, clathrin adaptor activity, clathrin binding, enzyme binding, estrogen receptor binding, follicle-stimulating hormone receptor binding, insulin-like growth factor…						GTPase activator activity, cysteine-type endopeptidase inhibitor activity involved in apoptotic process		AP-2 adaptor complex binding, G-protein coupled receptor binding, GTPase activator activity, V2 vasopressin receptor binding, alpha-1A adrenergic receptor binding, alpha-1B adrenergic receptor binding, angiotensin receptor binding, arrestin family protein binding, clathrin adaptor activity, clathrin binding, cysteine-type endopeptidase inhibitor activity involved in apoptotic process, enzyme bind…
Beta-crystallin A3 OS=Rattus norvegicus OX=10116 GN=Cryba1 PE=1 SV=2	CRBA1_RAT	25 kDa		negative regulation of ERK1 and ERK2 cascade, negative regulation of TOR signaling, negative regulation of cytokine production, negative regulation of phosphatidylinositol 3-kinase signaling, negative regulation of protein kinase B signaling, positive regulation of anoikis			lens development in camera-type eye								lens development in camera-type eye, visual perception								cytoplasm					nucleus			nucleus															structural constituent of eye lens
Beta-crystallin A4 OS=Rattus norvegicus OX=10116 GN=Cryba4 PE=1 SV=2	CRBA4_RAT	22 kDa					lens development in camera-type eye								lens development in camera-type eye, visual perception																															structural constituent of eye lens
Beta-crystallin B1 OS=Rattus norvegicus OX=10116 GN=Crybb1 PE=1 SV=4	CRBB1_RAT	28 kDa					lens development in camera-type eye								lens development in camera-type eye, visual perception																															structural constituent of eye lens
Beta-crystallin B2 OS=Rattus norvegicus OX=10116 GN=Crybb2 PE=1 SV=2	CRBB2_RAT	23 kDa					camera-type eye development, lens development in camera-type eye								lens development in camera-type eye, visual perception																							protein homodimerization activity								protein homodimerization activity, structural constituent of eye lens
Beta-crystallin B3 OS=Rattus norvegicus OX=10116 GN=Crybb3 PE=1 SV=5	CRBB3_RAT	24 kDa					lens development in camera-type eye								lens development in camera-type eye, visual perception																															structural constituent of eye lens
Beta-soluble NSF attachment protein OS=Rattus norvegicus OX=10116 GN=Napb PE=4 SV=1	F8WFM2_RAT	34 kDa
Beta-synuclein OS=Rattus norvegicus OX=10116 GN=Sncb PE=1 SV=1	A0A0G2JSQ1_RAT (+1)	14 kDa
Bifunctional purine biosynthesis protein PURH OS=Rattus norvegicus OX=10116 GN=Atic PE=1 SV=2	PUR9_RAT	64 kDa				'de novo' IMP biosynthetic process, cellular response to interleukin-7, cobalamin metabolic process, dihydrofolate metabolic process, nucleoside metabolic process, ribonucleotide metabolic process, tetrahydrofolate biosynthetic process	animal organ regeneration, brainstem development, cerebellum development, cerebral cortex development						'de novo' IMP biosynthetic process, cobalamin metabolic process, dihydrofolate metabolic process, nucleoside metabolic process, ribonucleotide metabolic process, tetrahydrofolate biosynthetic process		animal organ regeneration, cerebellum development, cerebral cortex development				cellular response to interleukin-7, response to inorganic substance				cytosol						plasma membrane					plasma membrane				protein homodimerization activity	IMP cyclohydrolase activity, phosphoribosylaminoimidazolecarboxamide formyltransferase activity							IMP cyclohydrolase activity, phosphoribosylaminoimidazolecarboxamide formyltransferase activity, protein homodimerization activity
Biliverdin reductase A OS=Rattus norvegicus OX=10116 GN=Blvra PE=1 SV=1	Q6AZ33_RAT	34 kDa
Biliverdin reductase B OS=Rattus norvegicus OX=10116 GN=Blvrb PE=1 SV=1	B5DF65_RAT	22 kDa
Bis(5'-nucleosyl)-tetraphosphatase [asymmetrical] OS=Rattus norvegicus OX=10116 GN=Nudt2 PE=2 SV=3	AP4A_RAT	17 kDa																																				GTP binding	bis(5'-nucleosyl)-tetraphosphatase (asymmetrical) activity, hydrolase activity							GTP binding, bis(5'-nucleosyl)-tetraphosphatase (asymmetrical) activity, hydrolase activity
Bleomycin hydrolase OS=Rattus norvegicus OX=10116 GN=Blmh PE=1 SV=1	BLMH_RAT (+1)	52 kDa				homocysteine catabolic process							homocysteine catabolic process						response to toxic substance				cytoplasm																cysteine-type endopeptidase activity, cysteine-type peptidase activity							cysteine-type endopeptidase activity, cysteine-type peptidase activity
Branched-chain-amino-acid aminotransferase, cytosolic OS=Rattus norvegicus OX=10116 GN=Bcat1 PE=1 SV=1	BCAT1_RAT	46 kDa				leucine biosynthetic process, valine biosynthetic process							leucine biosynthetic process, valine biosynthetic process										mitochondrion					mitochondrion		mitochondrion								identical protein binding	L-isoleucine transaminase activity, L-leucine transaminase activity, L-valine transaminase activity							L-isoleucine transaminase activity, L-leucine transaminase activity, L-valine transaminase activity, identical protein binding
BWK4 OS=Rattus norvegicus OX=10116 GN=Erp44 PE=1 SV=1	Q5VLR5_RAT	47 kDa
C2CD2-like OS=Rattus norvegicus OX=10116 GN=C2cd2l PE=1 SV=1	A0A0G2K2V4_RAT (+1)	71 kDa
Calbindin OS=Rattus norvegicus OX=10116 GN=Calb1 PE=1 SV=2	CALB1_RAT	30 kDa		regulation of long-term synaptic potentiation, regulation of presynaptic cytosolic calcium ion concentration, regulation of synaptic plasticity		cellular response to organic substance, regulation of presynaptic cytosolic calcium ion concentration	cochlea development, metanephric collecting duct development, metanephric connecting tubule development, metanephric distal convoluted tubule development, metanephric part of ureteric bud development, retina layer formation						vitamin D metabolic process		cochlea development, learning or memory, long-term memory, metanephric collecting duct development, metanephric connecting tubule development, metanephric distal convoluted tubule development, metanephric part of ureteric bud development, retina layer formation, short-term memory				cellular response to organic substance				cuticular plate, postsynaptic cytosol, presynaptic cytosol	cuticular plate				cuticular plate, nucleus			nucleus		cuticular plate, stereocilium					calcium ion binding involved in regulation of postsynaptic cytosolic calcium ion concentration, calcium ion binding involved in regulation of presynaptic cytosolic calcium ion concentration, vitamin D binding, zinc ion binding								calcium ion binding involved in regulation of postsynaptic cytosolic calcium ion concentration, calcium ion binding involved in regulation of presynaptic cytosolic calcium ion concentration, vitamin D binding, zinc ion binding
Calcium binding protein 4 (Predicted) OS=Rattus norvegicus OX=10116 GN=Cabp4 PE=4 SV=1	D3ZY59_RAT	30 kDa
Calcyclin-binding protein OS=Rattus norvegicus OX=10116 GN=Cacybp PE=1 SV=1	CYBP_RAT	27 kDa		negative regulation of cell death, positive regulation of DNA replication		cardiac muscle cell differentiation, cellular response to calcium ion, cellular response to leukemia inhibitory factor	aging, cardiac muscle cell differentiation, heart development								cardiac muscle cell differentiation, heart development				cellular response to calcium ion, cellular response to leukemia inhibitory factor, response to growth hormone				beta-catenin destruction complex, cytosol					nuclear envelope lumen, nucleoplasm, nucleus			nuclear envelope lumen, nucleoplasm, nucleus		nuclear envelope lumen, nucleoplasm					S100 protein binding, protein domain specific binding, protein homodimerization activity, tubulin binding, ubiquitin protein ligase binding								S100 protein binding, protein domain specific binding, protein homodimerization activity, tubulin binding, ubiquitin protein ligase binding
Calmodulin regulator protein PCP4 OS=Rattus norvegicus OX=10116 GN=Pcp4 PE=1 SV=2	PCP4_RAT	7 kDa		calmodulin dependent kinase signaling pathway, negative regulation of neuron apoptotic process, negative regulation of protein kinase activity, positive regulation of dopamine secretion, positive regulation of neuron differentiation, positive regulation of neuron projection development		calmodulin dependent kinase signaling pathway, cellular response to monosodium glutamate, osteoblast differentiation, positive regulation of neuron differentiation, positive regulation of neuron projection development	osteoblast differentiation, positive regulation of neuron differentiation, positive regulation of neuron projection development								osteoblast differentiation, positive regulation of neuron differentiation, positive regulation of neuron projection development				calmodulin dependent kinase signaling pathway, cellular response to monosodium glutamate, response to osmotic stress				cytoplasm, neurofilament	neurofilament				neurofilament					neurofilament					RNA binding, calcium ion binding, calmodulin binding								RNA binding, calcium ion binding, calmodulin binding
Calnexin OS=Rattus norvegicus OX=10116 GN=Canx PE=1 SV=1	CALX_RAT	67 kDa		endoplasmic reticulum unfolded protein response		endoplasmic reticulum unfolded protein response, protein folding	aging	clathrin-dependent endocytosis, synaptic vesicle endocytosis			clathrin-dependent endocytosis, synaptic vesicle endocytosis								endoplasmic reticulum unfolded protein response				dendrite cytoplasm, endoplasmic reticulum, endoplasmic reticulum membrane, endoplasmic reticulum quality control compartment, melanosome, ribosome, smooth endoplasmic reticulum		endoplasmic reticulum membrane, endoplasmic reticulum quality control compartment, smooth endoplasmic reticulum			endoplasmic reticulum, endoplasmic reticulum membrane, endoplasmic reticulum quality control compartment, melanosome, ribosome, smooth endoplasmic reticulum	endoplasmic reticulum membrane, integral component of postsynaptic membrane, integral component of presynaptic active zone membrane				ER-mitochondrion membrane contact site, endoplasmic reticulum membrane, endoplasmic reticulum quality control compartment	integral component of postsynaptic membrane, integral component of presynaptic active zone membrane	ribosome			apolipoprotein binding, calcium ion binding, carbohydrate binding, ionotropic glutamate receptor binding, unfolded protein binding								apolipoprotein binding, calcium ion binding, carbohydrate binding, ionotropic glutamate receptor binding, unfolded protein binding
Calpain small subunit 1-like OS=Rattus norvegicus OX=10116 GN=LOC108348197 PE=4 SV=1	A0A0G2K6H7_RAT (+2)	16 kDa
Calpain-2 catalytic subunit OS=Rattus norvegicus OX=10116 GN=Capn2 PE=1 SV=3	CAN2_RAT	80 kDa		positive regulation of cardiac muscle cell apoptotic process, positive regulation of myoblast fusion, positive regulation of neuron death, positive regulation of phosphatidylcholine biosynthetic process, regulation of cytoskeleton organization, regulation of interleukin-6 production		cellular response to amino acid stimulus, cellular response to interferon-beta, cellular response to lipopolysaccharide, myoblast fusion	blastocyst development, myoblast fusion						protein autoprocessing, proteolysis	cellular response to lipopolysaccharide, female pregnancy	behavioral response to pain, blastocyst development, female pregnancy		female pregnancy	female pregnancy	behavioral response to pain, cellular response to amino acid stimulus, cellular response to interferon-beta, cellular response to lipopolysaccharide, response to hydrogen peroxide, response to hypoxia			Golgi apparatus	Golgi apparatus, cytosol, lysosome, perinuclear endoplasmic reticulum		perinuclear endoplasmic reticulum			Golgi apparatus, chromatin, lysosome, nucleus, perinuclear endoplasmic reticulum	external side of plasma membrane, membrane, membrane raft, plasma membrane		nucleus		chromatin, perinuclear endoplasmic reticulum	external side of plasma membrane, plasma membrane				calcium ion binding, cytoskeletal protein binding, enzyme binding, protein heterodimerization activity	calcium-dependent cysteine-type endopeptidase activity							calcium ion binding, calcium-dependent cysteine-type endopeptidase activity, cytoskeletal protein binding, enzyme binding, protein heterodimerization activity
Calponin-3 OS=Rattus norvegicus OX=10116 GN=Cnn3 PE=1 SV=1	CNN3_RAT	36 kDa		negative regulation of ATPase activity		actomyosin structure organization, epithelial cell differentiation	epithelial cell differentiation																cytosol	actin filament, microtubule				actin filament, microtubule					actin filament, microtubule					actin binding, calmodulin binding, microtubule binding, protein binding, bridging								actin binding, calmodulin binding, microtubule binding, protein binding, bridging
Calretinin OS=Rattus norvegicus OX=10116 GN=Calb2 PE=1 SV=1	CALB2_RAT	31 kDa		regulation of long-term synaptic potentiation, regulation of presynaptic cytosolic calcium ion concentration		regulation of presynaptic cytosolic calcium ion concentration																	cuticular plate, cytosol	cuticular plate				cuticular plate, nucleus	synaptic membrane		nucleus		cuticular plate, stereocilium	synaptic membrane				calcium ion binding, calcium ion binding involved in regulation of presynaptic cytosolic calcium ion concentration								calcium ion binding, calcium ion binding involved in regulation of presynaptic cytosolic calcium ion concentration
Calumenin OS=Rattus norvegicus OX=10116 GN=Calu PE=1 SV=1	G3V6S3_RAT	37 kDa
CaM kinase-like vesicle-associated protein OS=Rattus norvegicus OX=10116 GN=Camkv PE=1 SV=1	CAMKV_RAT	54 kDa																					cytoplasmic vesicle membrane					cytoplasmic vesicle membrane	cytoplasmic vesicle membrane, plasma membrane			cytoplasmic vesicle membrane	cytoplasmic vesicle membrane	plasma membrane				ATP binding, calmodulin binding	calmodulin-dependent protein kinase activity							ATP binding, calmodulin binding, calmodulin-dependent protein kinase activity
cAMP-dependent protein kinase inhibitor alpha OS=Rattus norvegicus OX=10116 GN=Pkia PE=1 SV=2	IPKA_RAT	8 kDa		negative regulation of cAMP-dependent protein kinase activity, negative regulation of protein import into nucleus, negative regulation of transcription from RNA polymerase II promoter, regulation of G2/M transition of mitotic cell cycle																			cytoplasm					nucleus			nucleus							protein kinase A catalytic subunit binding						cAMP-dependent protein kinase inhibitor activity		cAMP-dependent protein kinase inhibitor activity, protein kinase A catalytic subunit binding
cAMP-dependent protein kinase type I-alpha regulatory subunit OS=Rattus norvegicus OX=10116 GN=Prkar1a PE=1 SV=2	KAP0_RAT	43 kDa		cGMP-mediated signaling, negative regulation of activated T cell proliferation, negative regulation of meiotic nuclear division, regulation of protein kinase activity		cGMP-mediated signaling, female meiotic division, sarcomere organization	cardiac muscle cell proliferation, mesoderm formation, sarcomere organization		cardiac muscle cell proliferation						cardiac muscle cell proliferation, mesoderm formation		female meiotic division	female meiotic division	cGMP-mediated signaling				cytoplasm, cytosol	axoneme				axoneme	immunological synapse, plasma membrane raft				axoneme	immunological synapse, plasma membrane raft				cAMP binding, protein domain specific binding, protein kinase A catalytic subunit binding, ubiquitin protein ligase binding	3',5'-cyclic-GMP phosphodiesterase activity					cAMP-dependent protein kinase inhibitor activity, cAMP-dependent protein kinase regulator activity		3',5'-cyclic-GMP phosphodiesterase activity, cAMP binding, cAMP-dependent protein kinase inhibitor activity, cAMP-dependent protein kinase regulator activity, protein domain specific binding, protein kinase A catalytic subunit binding, ubiquitin protein ligase binding
cAMP-dependent protein kinase type II-alpha regulatory subunit OS=Rattus norvegicus OX=10116 GN=Prkar2a PE=1 SV=4	KAP2_RAT	45 kDa		cGMP-mediated signaling, regulation of protein kinase activity		cGMP-mediated signaling, protein heterooligomerization													cGMP-mediated signaling, response to clozapine				cytoplasm, cytosol, perinuclear region of cytoplasm						T-tubule					T-tubule				beta-2 adrenergic receptor binding, cAMP binding, protein domain specific binding, protein homodimerization activity, protein kinase A catalytic subunit binding	3',5'-cyclic-GMP phosphodiesterase activity					cAMP-dependent protein kinase regulator activity		3',5'-cyclic-GMP phosphodiesterase activity, beta-2 adrenergic receptor binding, cAMP binding, cAMP-dependent protein kinase regulator activity, protein domain specific binding, protein homodimerization activity, protein kinase A catalytic subunit binding
Canopy 2 homolog (Zebrafish) OS=Rattus norvegicus OX=10116 GN=Cnpy2 PE=1 SV=1	A0JN30_RAT	21 kDa
Caprin-1 OS=Rattus norvegicus OX=10116 GN=Caprin1 PE=1 SV=1	A0A0G2K8H0_RAT	80 kDa
Carbonic anhydrase 1 OS=Rattus norvegicus OX=10116 GN=Ca1 PE=1 SV=1	CAH1_RAT	28 kDa				one-carbon metabolic process							one-carbon metabolic process										cytoplasm															zinc ion binding	arylesterase activity, carbonate dehydratase activity							arylesterase activity, carbonate dehydratase activity, zinc ion binding
Carbonic anhydrase 14 OS=Rattus norvegicus OX=10116 GN=Car14 PE=1 SV=1	A2IBE0_RAT	38 kDa
Carbonic anhydrase 2 OS=Rattus norvegicus OX=10116 GN=Ca2 PE=1 SV=2	CAH2_RAT	29 kDa		angiotensin-activated signaling pathway, positive regulation of bone resorption, positive regulation of cellular pH reduction, positive regulation of dipeptide transmembrane transport, positive regulation of osteoclast differentiation, positive regulation of synaptic transmission, GABAergic, regulation of bone resorption, regulation of cellular pH, regulation of chloride transport, regulation of …		angiotensin-activated signaling pathway, cellular response to fluid shear stress, osteoclast differentiation, positive regulation of cellular pH reduction, regulation of cellular pH	kidney development, morphogenesis of an epithelium, odontogenesis of dentin-containing tooth, osteoclast differentiation	carbon dioxide transport, secretion		osteoclast differentiation	carbon dioxide transport, secretion				kidney development, odontogenesis of dentin-containing tooth, osteoclast differentiation				angiotensin-activated signaling pathway, cellular response to fluid shear stress, response to estrogen, response to organic substance, response to pH, response to steroid hormone, response to zinc ion				cytosol				extracellular space		basolateral plasma membrane, plasma membrane					basolateral plasma membrane				zinc ion binding	arylesterase activity, carbonate dehydratase activity							arylesterase activity, carbonate dehydratase activity, zinc ion binding
CArG-binding factor A OS=Rattus norvegicus OX=10116 GN=Hnrnpab PE=1 SV=1	Q9QX80_RAT (+1)	31 kDa
Casein kinase II subunit alpha OS=Rattus norvegicus OX=10116 GN=Csnk2a1 PE=1 SV=2	CSK21_RAT	45 kDa		Wnt signaling pathway, negative regulation of cysteine-type endopeptidase activity involved in apoptotic process, positive regulation of Wnt signaling pathway, positive regulation of cell growth, positive regulation of cell proliferation, positive regulation of protein catabolic process, regulation of chromosome separation, regulation of protein localization to plasma membrane		Wnt signaling pathway, apoptotic process, cell cycle, peptidyl-serine phosphorylation, peptidyl-threonine phosphorylation, protein autophosphorylation	cerebral cortex development, liver regeneration						peptidyl-serine phosphorylation, peptidyl-threonine phosphorylation, protein autophosphorylation		cerebral cortex development, liver regeneration				Wnt signaling pathway, response to testosterone	rhythmic process			cytoplasm, cytosol					chromatin, nucleus	plasma membrane		nucleus		chromatin	plasma membrane				ATP binding, beta-catenin binding, ribonucleoprotein complex binding	protein serine/threonine kinase activity					protein phosphatase regulator activity		ATP binding, beta-catenin binding, protein phosphatase regulator activity, protein serine/threonine kinase activity, ribonucleoprotein complex binding
Casein kinase II subunit beta OS=Rattus norvegicus OX=10116 GN=Csnk2b PE=1 SV=1	CSK2B_RAT	25 kDa		Wnt signaling pathway, adiponectin-activated signaling pathway, negative regulation of blood vessel endothelial cell migration, positive regulation of activin receptor signaling pathway, positive regulation of pathway-restricted SMAD protein phosphorylation		Wnt signaling pathway, adiponectin-activated signaling pathway, peptidyl-threonine phosphorylation	endothelial tube morphogenesis, liver regeneration						peptidyl-threonine phosphorylation		endothelial tube morphogenesis, liver regeneration				Wnt signaling pathway, adiponectin-activated signaling pathway, response to testosterone				cytoplasm					PcG protein complex, chromatin, nuclear matrix, nucleus	plasma membrane		PcG protein complex, nuclear matrix		PcG protein complex, chromatin, nuclear matrix	plasma membrane				chromatin binding, identical protein binding, metal ion binding, protein domain specific binding, receptor binding, ribonucleoprotein complex binding, transcription factor binding	protein serine/threonine kinase activity					protein kinase regulator activity		chromatin binding, identical protein binding, metal ion binding, protein domain specific binding, protein kinase regulator activity, protein serine/threonine kinase activity, receptor binding, ribonucleoprotein complex binding, transcription factor binding
Catenin beta-1 OS=Rattus norvegicus OX=10116 GN=Ctnnb1 PE=1 SV=1	CTNB1_RAT	85 kDa	cell-cell adhesion	canonical Wnt signaling pathway involved in positive regulation of epithelial to mesenchymal transition, negative regulation of cell proliferation, negative regulation of gene expression, negative regulation of mitotic cell cycle, embryonic, negative regulation of protein sumoylation, negative regulation of transcription, DNA-templated, positive regulation of apoptotic process, positive regulatio…		Schwann cell proliferation, adherens junction assembly, canonical Wnt signaling pathway involved in positive regulation of epithelial to mesenchymal transition, cellular response to fibroblast growth factor stimulus, cellular response to growth factor stimulus, cellular response to indole-3-methanol, cellular response to insulin-like growth factor stimulus, cellular response to lithium ion, cellu…	Schwann cell proliferation, endothelial tube morphogenesis, liver development, midgut development, myoblast differentiation, neuron projection extension, odontogenesis of dentin-containing tooth, positive regulation of neuroblast proliferation, sympathetic ganglion development		neuron projection extension		protein localization to cell surface				Schwann cell proliferation, bone remodeling, endothelial tube morphogenesis, liver development, midgut development, neuron projection extension, odontogenesis of dentin-containing tooth, positive regulation of neuroblast proliferation, sympathetic ganglion development				canonical Wnt signaling pathway involved in positive regulation of epithelial to mesenchymal transition, cellular response to fibroblast growth factor stimulus, cellular response to growth factor stimulus, cellular response to indole-3-methanol, cellular response to insulin-like growth factor stimulus, cellular response to lithium ion, cellular response to mechanical stimulus, response to activit…				beta-catenin destruction complex, cell cortex, cytosol, perinuclear region of cytoplasm	centrosome, spindle pole				beta-catenin-TCF7L2 complex, centrosome, nuclear membrane, nucleus, spindle pole	catenin complex, membrane, nuclear membrane, plasma membrane		beta-catenin-TCF7L2 complex, nuclear membrane	nuclear membrane	beta-catenin-TCF7L2 complex, centrosome, nuclear membrane, spindle pole	catenin complex				RNA polymerase II transcription factor binding, alpha-catenin binding, cadherin binding, ionotropic glutamate receptor binding, macromolecular complex binding, nitric-oxide synthase binding, nuclear hormone receptor binding, protein phosphatase binding								RNA polymerase II transcription factor binding, alpha-catenin binding, cadherin binding, ionotropic glutamate receptor binding, macromolecular complex binding, nitric-oxide synthase binding, nuclear hormone receptor binding, protein phosphatase binding, transcription coactivator activity
Cathepsin B OS=Rattus norvegicus OX=10116 GN=Ctsb PE=1 SV=1	Q6IN22_RAT	38 kDa
CB1 cannabinoid receptor-interacting protein 1 OS=Rattus norvegicus OX=10116 GN=Cnrip1 PE=1 SV=1	CNRP1_RAT	19 kDa		negative regulation of receptor activity																			cytoplasm						plasma membrane					plasma membrane				protein C-terminus binding, type 1 cannabinoid receptor binding								protein C-terminus binding, type 1 cannabinoid receptor binding
Cbx5 protein OS=Rattus norvegicus OX=10116 GN=Cbx5 PE=1 SV=1	B2RYU7_RAT	22 kDa
CD2 antigen (Cytoplasmic tail) binding protein 2 (Predicted), isoform CRA_a OS=Rattus norvegicus OX=10116 GN=Cd2bp2 PE=1 SV=1	B4F786_RAT	38 kDa
CDC42 effector protein (Rho GTPase binding) 4 (Predicted), isoform CRA_a OS=Rattus norvegicus OX=10116 GN=Cdc42ep4 PE=1 SV=1	B1WC33_RAT	38 kDa
CDGSH iron-sulfur domain-containing protein 1 OS=Rattus norvegicus OX=10116 GN=Cisd1 PE=3 SV=1	CISD1_RAT	12 kDa		regulation of cellular respiration																			cytoplasmic side of mitochondrial outer membrane					cytoplasmic side of mitochondrial outer membrane	cytoplasmic side of mitochondrial outer membrane, integral component of membrane	cytoplasmic side of mitochondrial outer membrane		cytoplasmic side of mitochondrial outer membrane	cytoplasmic side of mitochondrial outer membrane					2 iron, 2 sulfur cluster binding, identical protein binding, metal ion binding								2 iron, 2 sulfur cluster binding, identical protein binding, metal ion binding
Cell adhesion molecule 1 OS=Rattus norvegicus OX=10116 GN=Cadm1 PE=1 SV=1	CADM1_RAT	52 kDa	heterophilic cell-cell adhesion via plasma membrane cell adhesion molecules, homophilic cell adhesion via plasma membrane adhesion molecules	positive regulation of natural killer cell mediated cytotoxicity, susceptibility to natural killer cell mediated cytotoxicity		cell recognition	brain development, liver development								brain development, liver development				detection of stimulus										basolateral plasma membrane, integral component of membrane, plasma membrane, postsynaptic membrane					basolateral plasma membrane, postsynaptic membrane				PDZ domain binding, cell adhesion molecule binding, protein homodimerization activity, receptor binding								PDZ domain binding, cell adhesion molecule binding, protein homodimerization activity, receptor binding
Cell adhesion molecule 2 OS=Rattus norvegicus OX=10116 GN=Cadm2 PE=1 SV=1	A0A0G2K5U6_RAT (+1)	41 kDa
Cell cycle and apoptosis regulator 2 OS=Rattus norvegicus OX=10116 GN=Ccar2 PE=1 SV=1	F1LM55_RAT	103 kDa
Cell division control protein 42 homolog OS=Rattus norvegicus OX=10116 GN=Cdc42 PE=1 SV=2	CDC42_RAT	21 kDa		Cdc42 protein signal transduction, integrin-mediated signaling pathway, negative regulation of protein complex assembly, neuropilin signaling pathway, positive regulation of DNA replication, positive regulation of JNK cascade, positive regulation of actin cytoskeleton reorganization, positive regulation of catalytic activity, positive regulation of cell growth, positive regulation of cytokinesis,…		Cdc42 protein signal transduction, Golgi organization, actin cytoskeleton organization, actin filament branching, actin filament organization, adherens junction organization, cell junction assembly, cell projection assembly, cellular response to interferon-gamma, dendritic cell migration, dendritic spine morphogenesis, establishment of cell polarity, establishment of epithelial cell apical/basal …	cardiac conduction system development, dendritic spine morphogenesis, establishment of epithelial cell apical/basal polarity, neuron fate determination, sprouting angiogenesis, submandibular salivary gland formation	establishment of Golgi localization, nuclear migration, organelle transport along microtubule, phagocytosis, engulfment		cellular response to interferon-gamma, dendritic cell migration	cellular protein localization, dendritic cell migration, establishment of Golgi localization, nuclear migration, organelle transport along microtubule, phagocytosis, engulfment	dendritic cell migration	viral RNA genome replication	viral RNA genome replication	cardiac conduction system development, dendritic spine morphogenesis, heart contraction, neuron fate determination, sprouting angiogenesis, submandibular salivary gland formation				Cdc42 protein signal transduction, cellular response to interferon-gamma, integrin-mediated signaling pathway, neuropilin signaling pathway, response to glucose		viral RNA genome replication	Golgi membrane, Golgi transport complex	Golgi membrane, Golgi transport complex, cell cortex, cytoplasmic ribonucleoprotein granule, cytosol, phagocytic vesicle, secretory granule, storage vacuole	centrosome, mitotic spindle, spindle midzone				Golgi membrane, Golgi transport complex, centrosome, cytoplasmic ribonucleoprotein granule, mitotic spindle, phagocytic vesicle, secretory granule, spindle midzone, storage vacuole	Golgi membrane, lamellipodium membrane, plasma membrane			Golgi membrane	Golgi membrane, Golgi transport complex, centrosome, mitotic spindle, spindle midzone	lamellipodium membrane, plasma membrane				GBD domain binding, GTP binding, GTP-dependent protein binding, apolipoprotein A-I receptor binding, identical protein binding, mitogen-activated protein kinase kinase kinase binding, thioesterase binding	GTPase activity, ubiquitin protein ligase activity							GBD domain binding, GTP binding, GTP-dependent protein binding, GTPase activity, apolipoprotein A-I receptor binding, identical protein binding, mitogen-activated protein kinase kinase kinase binding, thioesterase binding, ubiquitin protein ligase activity
Cellular nucleic acid-binding protein OS=Rattus norvegicus OX=10116 GN=Cnbp PE=2 SV=1	CNBP_RAT	19 kDa		positive regulation of cell proliferation, positive regulation of cytoplasmic translation, positive regulation of transcription from RNA polymerase II promoter, positive regulation of transcription, DNA-templated																			cytosol, endoplasmic reticulum		endoplasmic reticulum			endoplasmic reticulum, nucleus			nucleus							RNA polymerase II regulatory region sequence-specific DNA binding, mRNA binding, single-stranded DNA binding, single-stranded RNA binding, zinc ion binding								RNA polymerase II regulatory region sequence-specific DNA binding, mRNA binding, single-stranded DNA binding, single-stranded RNA binding, transcriptional repressor activity, RNA polymerase II transcription regulatory region sequence-specific binding, translation regulator activity, zinc ion binding
Cellular retinoic acid-binding protein 1 OS=Rattus norvegicus OX=10116 GN=Crabp1 PE=1 SV=3	RABP1_RAT	16 kDa		retinoic acid catabolic process		retinoic acid catabolic process							retinoic acid catabolic process										cytosol															retinal binding, retinoic acid binding, retinol binding								retinal binding, retinoic acid binding, retinol binding
Centrin 1 OS=Rattus norvegicus OX=10116 GN=Cetn1 PE=4 SV=1	G3V832_RAT	20 kDa
Centrin 2 OS=Rattus norvegicus OX=10116 GN=Cetn2 PE=1 SV=1	G3V9W0_RAT	20 kDa
cGMP-gated cation channel alpha-1 OS=Rattus norvegicus OX=10116 GN=Cnga1 PE=2 SV=1	CNGA1_RAT (+1)	79 kDa		membrane depolarization, regulation of cytosolic calcium ion concentration		regulation of cytosolic calcium ion concentration								spermatogenesis	spermatogenesis, visual perception		spermatogenesis	spermatogenesis	response to stimulus				cytoplasm						intracellular cyclic nucleotide activated cation channel complex									cGMP binding								cGMP binding, intracellular cAMP activated cation channel activity, intracellular cGMP activated cation channel activity	intracellular cAMP activated cation channel activity, intracellular cGMP activated cation channel activity
Chaperonin subunit 8 (Theta) (Predicted), isoform CRA_a OS=Rattus norvegicus OX=10116 GN=Cct8 PE=1 SV=1	D4ACB8_RAT	60 kDa
Charged multivesicular body protein 5 OS=Rattus norvegicus OX=10116 GN=Chmp5 PE=2 SV=1	CHMP5_RAT	25 kDa		regulation of centrosome duplication, regulation of mitotic spindle assembly, regulation of receptor recycling		cellular response to lipopolysaccharide, cellular response to muramyl dipeptide, lysosome organization, mitotic metaphase plate congression, nucleus organization, viral budding		endosome to lysosome transport, mitotic metaphase plate congression, multivesicular body sorting pathway, protein transport, viral budding			endosome to lysosome transport, mitotic metaphase plate congression, multivesicular body sorting pathway, protein transport, viral budding			cellular response to lipopolysaccharide, viral budding					cellular response to lipopolysaccharide, cellular response to muramyl dipeptide		viral budding		cytosol, endosome membrane			endosome membrane		endosome membrane, nucleus	endosome membrane		nucleus	endosome membrane	endosome membrane
Chloride intracellular channel protein 1 OS=Rattus norvegicus OX=10116 GN=Clic1 PE=1 SV=1	CLIC1_RAT	27 kDa		positive regulation of osteoblast differentiation, regulation of cell cycle, regulation of ion transmembrane transport, regulation of mitochondrial membrane potential				chloride transport			chloride transport												mitochondrion, perinuclear region of cytoplasm				extracellular exosome	mitochondrion, nuclear envelope, nuclear membrane, nucleus	chloride channel complex, nuclear membrane, plasma membrane	mitochondrion	nuclear envelope, nuclear membrane	nuclear membrane	nuclear envelope, nuclear membrane	plasma membrane												voltage-gated chloride channel activity
Chloride intracellular channel protein 4 OS=Rattus norvegicus OX=10116 GN=Clic4 PE=1 SV=3	CLIC4_RAT (+1)	29 kDa		negative regulation of cell migration, regulation of ion transmembrane transport			angiogenesis	chloride transport			chloride transport				angiogenesis								cytoplasmic vesicle membrane, endoplasmic reticulum, mitochondrion		endoplasmic reticulum			cytoplasmic vesicle membrane, endoplasmic reticulum, mitochondrion, nucleus	chloride channel complex, cytoplasmic vesicle membrane, integral component of membrane, plasma membrane	mitochondrion	nucleus	cytoplasmic vesicle membrane	cytoplasmic vesicle membrane	plasma membrane				macromolecular complex binding								chloride channel activity, macromolecular complex binding, voltage-gated ion channel activity
Chromobox 1 OS=Rattus norvegicus OX=10116 GN=Cbx1 PE=1 SV=1	D4A3T3_RAT	21 kDa
Chromobox 3 OS=Rattus norvegicus OX=10116 GN=Cbx3 PE=1 SV=1	Q5RJK5_RAT	21 kDa
Chromosome segregation 1-like OS=Rattus norvegicus OX=10116 GN=Cse1l PE=1 SV=1	D3ZPR0_RAT	110 kDa
Cilia- and flagella-associated protein 36 OS=Rattus norvegicus OX=10116 GN=Cfap36 PE=1 SV=1	CFA36_RAT	40 kDa																					cytoplasm					nucleus			nucleus		ciliary base, ciliary transition zone					protein N-terminus binding								protein N-terminus binding
Citrate synthase OS=Rattus norvegicus OX=10116 GN=Cs PE=1 SV=1	G3V936_RAT	52 kDa
Clathrin heavy chain OS=Rattus norvegicus OX=10116 GN=Cltc PE=1 SV=1	F1M779_RAT	192 kDa
Cleavage and polyadenylation specificity factor subunit 5 OS=Rattus norvegicus OX=10116 GN=Nudt21 PE=2 SV=1	CPSF5_RAT	26 kDa		positive regulation of mRNA cleavage, positive regulation of mRNA polyadenylation, positive regulation of pro-B cell differentiation, positive regulation of stem cell differentiation, posttranscriptional regulation of gene expression		cell differentiation, mRNA polyadenylation, mRNA processing, messenger ribonucleoprotein complex assembly, pre-mRNA cleavage required for polyadenylation, protein heterotetramerization	cell differentiation						mRNA polyadenylation, mRNA processing, pre-mRNA cleavage required for polyadenylation										cytoplasm	centrosome				centrosome, mRNA cleavage and polyadenylation specificity factor complex, mRNA cleavage factor complex, nucleus, paraspeckles			mRNA cleavage and polyadenylation specificity factor complex, mRNA cleavage factor complex, paraspeckles		centrosome, mRNA cleavage and polyadenylation specificity factor complex, mRNA cleavage factor complex, paraspeckles					chromatin binding, histone deacetylase binding, mRNA 3'-UTR AU-rich region binding, protein homodimerization activity	hydrolase activity							chromatin binding, histone deacetylase binding, hydrolase activity, mRNA 3'-UTR AU-rich region binding, protein homodimerization activity
Cluster of 14-3-3 protein zeta/delta OS=Rattus norvegicus OX=10116 GN=Ywhaz PE=1 SV=1 (1433Z_RAT)	1433Z_RAT [8]	28 kDa		MAPK cascade, cytoplasmic sequestering of protein, histamine secretion by mast cell, membrane depolarization during action potential, negative regulation of G-protein coupled receptor protein signaling pathway, negative regulation of calcium ion export from cell, negative regulation of calcium ion transmembrane transporter activity, negative regulation of ion transmembrane transport, negative reg…		MAPK cascade, cellular response to heat, cellular response to insulin stimulus, cytoplasmic sequestering of protein, histamine secretion by mast cell, neuron migration, protein heterooligomerization, protein targeting to mitochondrion, regulation of cytosolic calcium ion concentration, regulation of neuron differentiation, signal transduction, small GTPase mediated signal transduction	cerebral cortex development, hippocampus development, neuron migration, regulation of neuron differentiation	histamine secretion by mast cell, protein targeting, protein targeting to mitochondrion		histamine secretion by mast cell	cytoplasmic sequestering of protein, histamine secretion by mast cell, neuron migration, protein localization to nucleus, protein targeting, protein targeting to mitochondrion	neuron migration	MAPK cascade		cerebral cortex development, hippocampus development, histamine secretion by mast cell, neuron migration, regulation of neuron differentiation				MAPK cascade, cellular response to heat, cellular response to insulin stimulus, histamine secretion by mast cell, response to drug, signal transduction, small GTPase mediated signal transduction				cytosol, mast cell granule, melanosome, mitochondrion, perinuclear region of cytoplasm	kinesin complex				kinesin complex, mast cell granule, melanosome, mitochondrion, nucleus	plasma membrane	mitochondrion	nucleus		kinesin complex	plasma membrane				14-3-3 protein binding, actin binding, histone deacetylase binding, identical protein binding, insulin-like growth factor receptor binding, ion channel binding, macromolecular complex binding, phosphoserine binding, protein C-terminus binding, protein N-terminus binding, protein domain specific binding, protein heterodimerization activity, protein kinase C binding, receptor tyrosine kinase bindin…						protein kinase C inhibitor activity		14-3-3 protein binding, actin binding, calcium channel regulator activity, histone deacetylase binding, identical protein binding, insulin-like growth factor receptor binding, ion channel binding, macromolecular complex binding, phosphoserine binding, potassium channel regulator activity, protein C-terminus binding, protein N-terminus binding, protein domain specific binding, protein heterodimeri…
Cluster of 26S proteasome regulatory subunit 6A OS=Rattus norvegicus OX=10116 GN=Psmc3 PE=1 SV=1 (PRS6A_RAT)	PRS6A_RAT [2]	49 kDa		positive regulation of RNA polymerase II transcriptional preinitiation complex assembly									protein catabolic process										P-body, perinuclear region of cytoplasm					P-body, nucleus			nucleus							ATP binding	hydrolase activity							ATP binding, hydrolase activity
Cluster of 3'(2'),5'-bisphosphate nucleotidase 1 OS=Rattus norvegicus OX=10116 GN=Bpnt1 PE=1 SV=1 (BPNT1_RAT)	BPNT1_RAT [2]	33 kDa				phosphatidylinositol phosphorylation							phosphatidylinositol phosphorylation																									magnesium ion binding	3'(2'),5'-bisphosphate nucleotidase activity, inositol-1,4-bisphosphate 1-phosphatase activity							3'(2'),5'-bisphosphate nucleotidase activity, inositol-1,4-bisphosphate 1-phosphatase activity, magnesium ion binding
Cluster of 40S ribosomal protein S12 OS=Rattus norvegicus OX=10116 GN=LOC100360573 PE=3 SV=3 (D3ZHB3_RAT)	D3ZHB3_RAT [2]	15 kDa
Cluster of 40S ribosomal protein S17 OS=Rattus norvegicus OX=10116 GN=Rps17 PE=3 SV=1 (A0A0H2UHQ8_RAT)	A0A0H2UHQ8_RAT [4]	15 kDa
Cluster of 60S acidic ribosomal protein P0 OS=Rattus norvegicus OX=10116 GN=Rplp0 PE=1 SV=2 (RLA0_RAT)	RLA0_RAT [2]	34 kDa		lactation		cellular response to Thyroid stimulating hormone, cellular response to cAMP, cellular response to phorbol 13-acetate 12-myristate, cytoplasmic translation, ribosomal large subunit assembly	lactation	lactation			lactation		cytoplasmic translation		lactation				cellular response to Thyroid stimulating hormone, cellular response to cAMP, cellular response to phorbol 13-acetate 12-myristate, response to selenium ion				cytosolic large ribosomal subunit					cytosolic large ribosomal subunit, nucleus	membrane		nucleus		cytosolic large ribosomal subunit		cytosolic large ribosomal subunit			large ribosomal subunit rRNA binding, peptide binding								large ribosomal subunit rRNA binding, peptide binding, structural constituent of ribosome
Cluster of 6-phosphogluconate dehydrogenase, decarboxylating OS=Rattus norvegicus OX=10116 GN=Pgd PE=1 SV=1 (6PGD_RAT)	6PGD_RAT [2]	53 kDa				D-gluconate catabolic process, D-gluconate metabolic process, pentose-phosphate shunt, pentose-phosphate shunt, oxidative branch							D-gluconate catabolic process, D-gluconate metabolic process, carbohydrate metabolic process, pentose-phosphate shunt, pentose-phosphate shunt, oxidative branch										cytosol					intracellular membrane-bounded organelle										NADP binding, carbohydrate binding, carboxylic acid binding	phosphogluconate dehydrogenase (decarboxylating) activity							NADP binding, carbohydrate binding, carboxylic acid binding, phosphogluconate dehydrogenase (decarboxylating) activity
Cluster of 6-phosphogluconolactonase OS=Rattus norvegicus OX=10116 GN=Pgls PE=1 SV=1 (6PGL_RAT)	6PGL_RAT [2]	27 kDa				pentose-phosphate shunt, oxidative branch							carbohydrate metabolic process, pentose-phosphate shunt, oxidative branch										cytoplasm															monosaccharide binding	6-phosphogluconolactonase activity							6-phosphogluconolactonase activity, monosaccharide binding
Cluster of Acetyl-CoA acetyltransferase, cytosolic OS=Rattus norvegicus OX=10116 GN=Acat2 PE=1 SV=1 (THIC_RAT)	THIC_RAT [5]	41 kDa				cellular response to fatty acid, cellular response to nutrient, dolichol biosynthetic process, fatty acid beta-oxidation, ketone body catabolic process	brain development, liver development						cholesterol biosynthetic process, dolichol biosynthetic process, fatty acid beta-oxidation, ketone body catabolic process		brain development, liver development				cellular response to fatty acid, cellular response to nutrient				cytosol, mitochondrion, peroxisome					mitochondrion, peroxisome		mitochondrion									acetyl-CoA C-acetyltransferase activity, acetyl-CoA C-acyltransferase activity							acetyl-CoA C-acetyltransferase activity, acetyl-CoA C-acyltransferase activity
Cluster of Actin, alpha skeletal muscle OS=Rattus norvegicus OX=10116 GN=Acta1 PE=1 SV=1 (ACTS_RAT)	ACTS_RAT [5]	42 kDa		positive regulation of gene expression, regulation of cyclin-dependent protein serine/threonine kinase activity, regulation of norepinephrine uptake, regulation of transmembrane transporter activity		axonogenesis, cell motility, cellular response to electrical stimulus, cellular response to organonitrogen compound, skeletal muscle fiber adaptation, skeletal muscle fiber development, skeletal muscle thin filament assembly	axonogenesis, mesenchyme migration, retina development in camera-type eye, skeletal muscle fiber development, skeletal muscle thin filament assembly	synaptic vesicle endocytosis			cell motility, synaptic vesicle endocytosis	cell motility			axonogenesis, mesenchyme migration, retina development in camera-type eye, skeletal muscle fiber adaptation, skeletal muscle fiber development				cellular response to electrical stimulus, cellular response to organonitrogen compound, response to calcium ion, response to extracellular stimulus, response to immobilization stress, response to lithium ion, response to mechanical stimulus, response to steroid hormone, skeletal muscle fiber adaptation	circadian rhythm			cytoplasm, cytosol, dense body, striated muscle thin filament	actin filament, podosome, postsynaptic actin cytoskeleton, stress fiber, striated muscle thin filament				NuA4 histone acetyltransferase complex, actin filament, cytoskeleton, nucleus, podosome, postsynaptic actin cytoskeleton, stress fiber, striated muscle thin filament	membrane raft, plasma membrane		NuA4 histone acetyltransferase complex		NuA4 histone acetyltransferase complex, actin filament, podosome, stress fiber, striated muscle thin filament	plasma membrane				ATP binding, protein kinase binding								ATP binding, protein kinase binding, structural constituent of postsynaptic actin cytoskeleton
Cluster of Actin-related protein 3 OS=Rattus norvegicus OX=10116 GN=Actr3 PE=1 SV=1 (ARP3_RAT)	ARP3_RAT [2]	47 kDa		Arp2/3 complex-mediated actin nucleation, negative regulation of axon extension, negative regulation of bleb assembly, positive regulation of actin cytoskeleton reorganization, positive regulation of astrocyte differentiation, positive regulation of dendrite morphogenesis, positive regulation of dendritic spine morphogenesis, positive regulation of fibroblast migration, positive regulation of fil…		Arp2/3 complex-mediated actin nucleation, astrocyte differentiation, cellular response to epidermal growth factor stimulus, cellular response to interleukin-1, cellular response to pyrimidine ribonucleotide, cellular response to transforming growth factor beta stimulus, cellular response to trichostatin A, cellular response to triterpenoid, cellular response to tumor necrosis factor, cilium assem…	astrocyte differentiation, negative regulation of axon extension, positive regulation of astrocyte differentiation, positive regulation of dendrite morphogenesis, positive regulation of dendritic spine morphogenesis, positive regulation of neuron differentiation							spermatogenesis	Sertoli cell barrier remodeling, astrocyte differentiation, negative regulation of axon extension, positive regulation of astrocyte differentiation, positive regulation of dendrite morphogenesis, positive regulation of dendritic spine morphogenesis, positive regulation of neuron differentiation, spermatogenesis		spermatogenesis	spermatogenesis	cellular response to epidermal growth factor stimulus, cellular response to interleukin-1, cellular response to pyrimidine ribonucleotide, cellular response to transforming growth factor beta stimulus, cellular response to trichostatin A, cellular response to triterpenoid, cellular response to tumor necrosis factor, response to estradiol, response to heparin			Golgi membrane	Golgi membrane, actin cortical patch, cytoplasm, perinuclear region of cytoplasm	Arp2/3 protein complex, actin cortical patch, podosome, podosome core				Arp2/3 protein complex, Golgi membrane, actin cortical patch, nucleus, podosome, podosome core, site of double-strand break	Golgi membrane		nucleus	Golgi membrane	Arp2/3 protein complex, Golgi membrane, actin cortical patch, podosome, podosome core, site of double-strand break					ATP binding, ATPase binding, actin binding								ATP binding, ATPase binding, actin binding
Cluster of Acyl-CoA-binding protein OS=Rattus norvegicus OX=10116 GN=Dbi PE=1 SV=3 (ACBP_RAT)	ACBP_RAT [2]	10 kDa		negative regulation of fatty acid beta-oxidation, pancreatic juice secretion, positive regulation of lipid biosynthetic process, positive regulation of release of sequestered calcium ion into cytosol, regulation of synaptic transmission, GABAergic		acyl-CoA metabolic process, cellular response to nutrient, glial cell proliferation	brain development, glial cell proliferation	pancreatic juice secretion			pancreatic juice secretion		acyl-CoA metabolic process, steroid biosynthetic process		brain development, glial cell proliferation, pancreatic juice secretion				cellular response to nutrient			Golgi apparatus	Golgi apparatus, contractile fiber, endoplasmic reticulum, synaptic vesicle		endoplasmic reticulum		extracellular space	Golgi apparatus, contractile fiber, endoplasmic reticulum, nucleus, synaptic vesicle	plasma membrane		nucleus			plasma membrane				benzodiazepine receptor binding, fatty-acyl-CoA binding, lipid binding								benzodiazepine receptor binding, fatty-acyl-CoA binding, lipid binding
Cluster of Adducin 1 (Alpha), isoform CRA_b OS=Rattus norvegicus OX=10116 GN=Add1 PE=1 SV=1 (A0A0G2JSM7_RAT)	A0A0G2JSM7_RAT [3]	80 kDa
Cluster of Adducin 3 (Gamma), isoform CRA_a OS=Rattus norvegicus OX=10116 GN=Add3 PE=1 SV=1 (G3V9D7_RAT)	G3V9D7_RAT [2]	79 kDa		barbed-end actin filament capping, positive regulation of vasoconstriction		actin filament bundle assembly, barbed-end actin filament capping									positive regulation of vasoconstriction				response to drug				cytoplasm	cytoskeleton				cytoskeleton	plasma membrane raft					plasma membrane raft				actin filament binding, calmodulin binding, protein kinase C binding, spectrin binding								actin filament binding, calmodulin binding, protein kinase C binding, spectrin binding
Cluster of Adenylate kinase isoenzyme 1 OS=Rattus norvegicus OX=10116 GN=Ak1 PE=1 SV=3 (KAD1_RAT)	KAD1_RAT [2]	22 kDa		positive regulation of glucose transport, positive regulation of neuron maturation		ADP biosynthetic process, AMP metabolic process, ATP metabolic process, adenine metabolic process, inosine biosynthetic process, neuron differentiation, nucleoside diphosphate phosphorylation, nucleoside triphosphate biosynthetic process, positive regulation of neuron maturation	cerebellum development, muscle organ development, neuron differentiation, olfactory bulb development, positive regulation of neuron maturation						ADP biosynthetic process, AMP metabolic process, ATP metabolic process, adenine metabolic process, inosine biosynthetic process, nucleoside diphosphate phosphorylation, nucleoside triphosphate biosynthetic process		cerebellum development, muscle organ development, neuron differentiation, olfactory bulb development, positive regulation of neuron maturation				response to activity, response to drug, response to estradiol, response to testosterone				perinuclear region of cytoplasm, sarcomere					sarcomere					sarcomere					ATP binding	adenylate kinase activity, nucleoside diphosphate kinase activity							ATP binding, adenylate kinase activity, nucleoside diphosphate kinase activity
Cluster of ADP/ATP translocase 2 OS=Rattus norvegicus OX=10116 GN=Slc25a5 PE=1 SV=3 (ADT2_RAT)	ADT2_RAT [4]	33 kDa		negative regulation of cardiac muscle cell apoptotic process, negative regulation of mitochondrial membrane permeability involved in apoptotic process, negative regulation of mitochondrial outer membrane permeabilization involved in apoptotic signaling pathway, positive regulation of cell growth involved in cardiac muscle cell development, positive regulation of cell proliferation, positive regul…		cellular response to leukemia inhibitory factor, chromosome segregation, negative regulation of mitochondrial membrane permeability involved in apoptotic process, negative regulation of mitochondrial outer membrane permeabilization involved in apoptotic signaling pathway	aging, heart development, liver development	ADP transport, negative regulation of mitochondrial membrane permeability involved in apoptotic process, negative regulation of mitochondrial outer membrane permeabilization involved in apoptotic signaling pathway			ADP transport, negative regulation of mitochondrial membrane permeability involved in apoptotic process, negative regulation of mitochondrial outer membrane permeabilization involved in apoptotic signaling pathway				heart development, liver development				cellular response to leukemia inhibitory factor, response to interleukin-1				integral component of mitochondrial membrane, mitochondrial inner membrane, mitochondrial nucleoid, mitochondrial outer membrane, mitochondrion	MMXD complex				MMXD complex, integral component of mitochondrial membrane, mitochondrial inner membrane, mitochondrial nucleoid, mitochondrial outer membrane, mitochondrion	integral component of mitochondrial membrane, membrane raft, mitochondrial inner membrane, mitochondrial outer membrane	integral component of mitochondrial membrane, mitochondrial inner membrane, mitochondrial nucleoid, mitochondrial outer membrane		integral component of mitochondrial membrane, mitochondrial inner membrane, mitochondrial outer membrane	MMXD complex, integral component of mitochondrial membrane, mitochondrial inner membrane, mitochondrial nucleoid, mitochondrial outer membrane					ubiquitin protein ligase binding								ATP:ADP antiporter activity, ubiquitin protein ligase binding
Cluster of ADP-ribosylation factor 3 OS=Rattus norvegicus OX=10116 GN=Arf3 PE=3 SV=1 (A0A0G2K9H8_RAT)	A0A0G2K9H8_RAT [5]	21 kDa		activation of phospholipase D activity, epidermal growth factor receptor signaling pathway, negative regulation of apoptotic process, positive regulation of transcription from RNA polymerase II promoter, regulation of reactive oxygen species metabolic process		cell migration, dendritic spine development, epidermal growth factor receptor signaling pathway, establishment or maintenance of epithelial cell apical/basal polarity, protein ADP-ribosylation	brain development, dendritic spine development	intracellular protein transport, retrograde vesicle-mediated transport, Golgi to ER			apical protein localization, cell migration, intracellular protein transport, protein localization to cilium, retrograde vesicle-mediated transport, Golgi to ER	cell migration	protein ADP-ribosylation		brain development, dendritic spine development, learning				epidermal growth factor receptor signaling pathway, response to axon injury			Golgi apparatus	Golgi apparatus, cytoplasm, cytosol, perinuclear region of cytoplasm					Golgi apparatus	plasma membrane, ruffle membrane					plasma membrane, ruffle membrane				GTP binding, epidermal growth factor receptor binding								GTP binding, epidermal growth factor receptor binding
Cluster of Alcohol dehydrogenase class-3 OS=Rattus norvegicus OX=10116 GN=Adh5 PE=1 SV=2 (ADHX_RAT)	ADHX_RAT [2]	40 kDa				fatty acid omega-oxidation, formaldehyde catabolic process	aging						ethanol catabolic process, ethanol oxidation, fatty acid omega-oxidation, formaldehyde catabolic process										cytoplasm, cytosol					nucleus			nucleus							zinc ion binding	S-(hydroxymethyl)glutathione dehydrogenase activity, alcohol dehydrogenase activity, zinc-dependent							S-(hydroxymethyl)glutathione dehydrogenase activity, alcohol dehydrogenase activity, zinc-dependent, zinc ion binding
Cluster of Alpha-1,4 glucan phosphorylase OS=Rattus norvegicus OX=10116 GN=Pygb PE=1 SV=2 (G3V6Y6_RAT)	G3V6Y6_RAT [3]	97 kDa		glucose homeostasis		5-phosphoribose 1-diphosphate biosynthetic process, glycogen catabolic process, necroptotic process							5-phosphoribose 1-diphosphate biosynthetic process, glycogen catabolic process	response to bacterium					response to bacterium				cytoplasm															AMP binding, ATP binding, bile acid binding, carbohydrate binding, drug binding, protein homodimerization activity, purine nucleobase binding, pyridoxal phosphate binding	glycogen phosphorylase activity							AMP binding, ATP binding, bile acid binding, carbohydrate binding, drug binding, glycogen phosphorylase activity, protein homodimerization activity, purine nucleobase binding, pyridoxal phosphate binding
Cluster of Alpha-2-HS-glycoprotein OS=Rattus norvegicus OX=10116 GN=Ahsg PE=1 SV=2 (FETUA_RAT)	FETUA_RAT [2]	38 kDa		negative regulation of bone mineralization, negative regulation of cell growth, negative regulation of endopeptidase activity, negative regulation of insulin receptor signaling pathway, positive regulation of bone resorption, positive regulation of phagocytosis, regulation of inflammatory response		cellular response to insulin stimulus, macromolecular complex assembly	animal organ regeneration, cerebral cortex development, male gonad development								animal organ regeneration, cerebral cortex development, male gonad development		male gonad development	male gonad development	acute-phase response, cellular response to insulin stimulus								extracellular region, extracellular space																	cysteine-type endopeptidase inhibitor activity, kinase inhibitor activity, receptor signaling protein tyrosine kinase inhibitor activity		cysteine-type endopeptidase inhibitor activity, kinase inhibitor activity, receptor signaling protein tyrosine kinase inhibitor activity
Cluster of Alpha-actinin-4 OS=Rattus norvegicus OX=10116 GN=Actn4 PE=1 SV=1 (A0A0G2K5U9_RAT)	A0A0G2K5U9_RAT [6]	105 kDa				actin crosslink formation, actin filament bundle assembly																	Z disc, cytosol	cytoskeleton				Z disc, cytoskeleton, nucleus	plasma membrane		nucleus		Z disc	plasma membrane				actin filament binding, calcium ion binding, protein domain specific binding								actin filament binding, calcium ion binding, protein domain specific binding
Cluster of Alpha-enolase OS=Rattus norvegicus OX=10116 GN=Eno1 PE=1 SV=4 (ENOA_RAT)	ENOA_RAT [6]	47 kDa		ERK1 and ERK2 cascade, negative regulation of neuron death, regulation of neuron death		ERK1 and ERK2 cascade, canonical glycolysis, cellular response to hypoxia, glycolytic process, protein heterotetramerization	aging, skeletal muscle tissue regeneration		skeletal muscle tissue regeneration				ERK1 and ERK2 cascade, canonical glycolysis, gluconeogenesis, glycolytic process		multicellular organismal reproductive process		multicellular organismal reproductive process	multicellular organismal reproductive process	ERK1 and ERK2 cascade, cellular response to hypoxia, response to drug, response to estradiol, skeletal muscle tissue regeneration				cell cortex region, cytosol, phosphopyruvate hydratase complex						membrane raft, plasma membrane, synaptic membrane					plasma membrane, synaptic membrane				enzyme binding, heat shock protein binding, magnesium ion binding, protein heterodimerization activity, protein homodimerization activity	phosphopyruvate hydratase activity							enzyme binding, heat shock protein binding, magnesium ion binding, phosphopyruvate hydratase activity, protein heterodimerization activity, protein homodimerization activity
Cluster of Amino acid transporter OS=Rattus norvegicus OX=10116 GN=Slc1a3 PE=1 SV=1 (A0A0G2KAS7_RAT)	A0A0G2KAS7_RAT [3]	55 kDa
Cluster of Aminoacylase-1A OS=Rattus norvegicus OX=10116 GN=Acy1a PE=1 SV=1 (ACY1A_RAT)	ACY1A_RAT [2]	46 kDa				cellular amino acid metabolic process							cellular amino acid metabolic process, protein catabolic process										cytoplasm															metal ion binding	aminoacylase activity, metallopeptidase activity							aminoacylase activity, metal ion binding, metallopeptidase activity
Cluster of AP complex subunit beta OS=Rattus norvegicus OX=10116 GN=Ap1b1 PE=1 SV=1 (A0A0G2K2V2_RAT)	A0A0G2K2V2_RAT [3]	104 kDa
Cluster of AP-2 complex subunit alpha OS=Rattus norvegicus OX=10116 GN=Ap2a1 PE=1 SV=1 (D3ZUY8_RAT)	D3ZUY8_RAT [3]	108 kDa						clathrin-dependent endocytosis, intracellular protein transport			clathrin-dependent endocytosis, intracellular protein transport												AP-2 adaptor complex, synaptic vesicle					AP-2 adaptor complex, synaptic vesicle	AP-2 adaptor complex, plasma membrane			AP-2 adaptor complex	AP-2 adaptor complex	AP-2 adaptor complex				clathrin adaptor activity, macromolecular complex binding, phosphatidylinositol binding								clathrin adaptor activity, macromolecular complex binding, phosphatidylinositol binding
Cluster of ATPase, H+ transporting, V1 subunit E isoform 1, isoform CRA_a OS=Rattus norvegicus OX=10116 GN=Atp6v1e1 PE=1 SV=1 (G3V7L8_RAT)	G3V7L8_RAT [2]	26 kDa
Cluster of ATP-binding cassette, subfamily A (ABC1), member 8a OS=Rattus norvegicus OX=10116 GN=Abca8a PE=1 SV=3 (D3ZCF8_RAT)	D3ZCF8_RAT [3]	185 kDa
Cluster of ATP-dependent 6-phosphofructokinase OS=Rattus norvegicus OX=10116 GN=Pfkm PE=1 SV=1 (A0A0G2KBC7_RAT)	A0A0G2KBC7_RAT [2]	94 kDa		cellular glucose homeostasis		canonical glycolysis, cellular glucose homeostasis, fructose 1,6-bisphosphate metabolic process, fructose 6-phosphate metabolic process, glycolytic process, protein homotetramerization							canonical glycolysis, fructose 1,6-bisphosphate metabolic process, fructose 6-phosphate metabolic process, glucose catabolic process, glycolytic process										6-phosphofructokinase complex						membrane									AMP binding, ATP binding, fructose-6-phosphate binding, identical protein binding, metal ion binding, monosaccharide binding	6-phosphofructokinase activity, phosphofructokinase activity							6-phosphofructokinase activity, AMP binding, ATP binding, fructose-6-phosphate binding, identical protein binding, metal ion binding, monosaccharide binding, phosphofructokinase activity
Cluster of Brain acid soluble protein 1 OS=Rattus norvegicus OX=10116 GN=Basp1 PE=1 SV=1 (A0A0G2K1L8_RAT)	A0A0G2K1L8_RAT [2]	22 kDa		negative regulation of transcription, DNA-templated																			cytoplasm					nuclear speck, nucleus	plasma membrane		nuclear speck, nucleus		nuclear speck	plasma membrane				calmodulin binding, transcription regulatory region DNA binding								calmodulin binding, transcription corepressor activity, transcription regulatory region DNA binding
Cluster of BUB3 mitotic checkpoint protein OS=Rattus norvegicus OX=10116 GN=Bub3 PE=1 SV=1 (Q4FZS2_RAT)	Q4FZS2_RAT [2]	37 kDa
Cluster of Calcium/calmodulin-dependent protein kinase type II subunit delta OS=Rattus norvegicus OX=10116 GN=Camk2d PE=1 SV=1 (KCC2D_RAT)	KCC2D_RAT [7]	60 kDa		NMDA selective glutamate receptor signaling pathway, calmodulin dependent kinase signaling pathway, cellular potassium ion homeostasis, endoplasmic reticulum calcium ion homeostasis, ionotropic glutamate receptor signaling pathway, positive regulation of DNA biosynthetic process, positive regulation of ERK1 and ERK2 cascade, positive regulation of G2/M transition of mitotic cell cycle, positive r…		G1/S transition of mitotic cell cycle, NMDA selective glutamate receptor signaling pathway, calmodulin dependent kinase signaling pathway, cardiac muscle cell contraction, cell differentiation, cell growth involved in cardiac muscle cell development, cellular potassium ion homeostasis, dendritic spine development, endoplasmic reticulum calcium ion homeostasis, ionotropic glutamate receptor signal…	cell differentiation, cell growth involved in cardiac muscle cell development, dendritic spine development, nervous system development, regulation of neuron migration	calcium ion transport, regulation of mitochondrial membrane permeability involved in apoptotic process	cell growth involved in cardiac muscle cell development		calcium ion transport, postsynaptic neurotransmitter receptor diffusion trapping, regulation of mitochondrial membrane permeability involved in apoptotic process		peptidyl-serine phosphorylation, peptidyl-threonine autophosphorylation, protein autophosphorylation		cardiac muscle cell contraction, cell growth involved in cardiac muscle cell development, dendritic spine development, regulation of neuron migration, relaxation of cardiac muscle				NMDA selective glutamate receptor signaling pathway, calmodulin dependent kinase signaling pathway, ionotropic glutamate receptor signaling pathway, regulation of cardiac muscle contraction by regulation of the release of sequestered calcium ion, response to hypoxia, response to ischemia, response to oxidative stress				dendrite cytoplasm, mitochondrion, perinuclear region of cytoplasm, postsynaptic cytosol, presynaptic cytosol, sarcoplasmic reticulum membrane		sarcoplasmic reticulum membrane			mitochondrion, nucleoplasm, nucleus, sarcoplasmic reticulum membrane	postsynaptic specialization membrane, sarcolemma, sarcoplasmic reticulum membrane	mitochondrion	nucleoplasm	sarcoplasmic reticulum membrane	nucleoplasm, postsynaptic specialization membrane, sarcoplasmic reticulum membrane	postsynaptic specialization membrane, sarcolemma				ATP binding, GTPase activating protein binding, calmodulin binding, glutamate receptor binding, ion channel binding, metal ion binding, nitric-oxide synthase binding	calmodulin-dependent protein kinase activity							ATP binding, GTPase activating protein binding, calmodulin binding, calmodulin-dependent protein kinase activity, glutamate receptor binding, ion channel binding, metal ion binding, nitric-oxide synthase binding
Cluster of Calcium-dependent secretion activator 1 OS=Rattus norvegicus OX=10116 GN=Cadps PE=1 SV=1 (CAPS1_RAT)	CAPS1_RAT [3]	146 kDa		positive regulation of calcium ion-dependent exocytosis, positive regulation of exocytosis, synaptic vesicle exocytosis		dense core granule exocytosis, synaptic vesicle exocytosis		dense core granule exocytosis, protein transport, synaptic vesicle exocytosis			dense core granule exocytosis, protein transport, synaptic vesicle exocytosis												dense core granule, extrinsic component of neuronal dense core vesicle membrane					dense core granule, extrinsic component of neuronal dense core vesicle membrane	extrinsic component of neuronal dense core vesicle membrane			extrinsic component of neuronal dense core vesicle membrane	extrinsic component of neuronal dense core vesicle membrane					calcium ion binding, phosphatidylinositol-4,5-bisphosphate binding								calcium ion binding, phosphatidylinositol-4,5-bisphosphate binding
Cluster of Calmodulin-2 OS=Rattus norvegicus OX=10116 GN=Calm2 PE=1 SV=1 (CALM2_RAT)	CALM2_RAT [2]	17 kDa		activation of adenylate cyclase activity, calcium-mediated signaling, negative regulation of ryanodine-sensitive calcium-release channel activity, positive regulation of DNA binding, positive regulation of cyclic-nucleotide phosphodiesterase activity, positive regulation of nitric-oxide synthase activity, positive regulation of phosphoprotein phosphatase activity, positive regulation of ryanodine…		G2/M transition of mitotic cell cycle, calcium-mediated signaling, establishment of protein localization to mitochondrial membrane		establishment of protein localization to membrane, establishment of protein localization to mitochondrial membrane			establishment of protein localization to membrane, establishment of protein localization to mitochondrial membrane								calcium-mediated signaling, detection of calcium ion, response to amphetamine, response to corticosterone				mitochondrion, sarcomere	centrosome, spindle microtubule, spindle pole				centrosome, mitochondrion, nucleus, sarcomere, spindle microtubule, spindle pole	calcium channel complex, plasma membrane, voltage-gated potassium channel complex	mitochondrion	nucleus		centrosome, sarcomere, spindle microtubule, spindle pole	plasma membrane, voltage-gated potassium channel complex				N-terminal myristoylation domain binding, adenylate cyclase binding, calcium ion binding, disordered domain specific binding, ion channel binding, nitric-oxide synthase binding, protein N-terminus binding, protein kinase binding, titin binding						adenylate cyclase activator activity, nitric-oxide synthase regulator activity, protein phosphatase activator activity		N-terminal myristoylation domain binding, adenylate cyclase activator activity, adenylate cyclase binding, calcium channel inhibitor activity, calcium ion binding, disordered domain specific binding, ion channel binding, nitric-oxide synthase binding, nitric-oxide synthase regulator activity, protein N-terminus binding, protein kinase binding, protein phosphatase activator activity, titin binding
Cluster of Calreticulin OS=Rattus norvegicus OX=10116 GN=Calr PE=1 SV=1 (CALR_RAT)	CALR_RAT [3]	48 kDa		endoplasmic reticulum unfolded protein response, negative regulation of cell cycle arrest, negative regulation of intracellular steroid hormone receptor signaling pathway, negative regulation of neuron differentiation, negative regulation of retinoic acid receptor signaling pathway, negative regulation of transcription from RNA polymerase II promoter, negative regulation of translation, negative …		cardiac muscle cell differentiation, cellular response to lithium ion, cellular response to organic substance, cellular senescence, cortical actin cytoskeleton organization, endoplasmic reticulum unfolded protein response, negative regulation of neuron differentiation, peptide antigen assembly with MHC class I protein complex, protein folding	cardiac muscle cell differentiation, cellular senescence, negative regulation of neuron differentiation	protein export from nucleus		peptide antigen assembly with MHC class I protein complex	protein export from nucleus, protein localization to nucleus			spermatogenesis	cardiac muscle cell differentiation, negative regulation of neuron differentiation, spermatogenesis		spermatogenesis	spermatogenesis	cellular response to lithium ion, cellular response to organic substance, cellular senescence, endoplasmic reticulum unfolded protein response, response to drug, response to estradiol, response to testosterone			Golgi apparatus	Golgi apparatus, MHC class I peptide loading complex, acrosomal vesicle, cytoplasm, cytosol, endoplasmic reticulum membrane, endoplasmic reticulum quality control compartment, perinuclear region of cytoplasm, sarcoplasmic reticulum, sarcoplasmic reticulum lumen, smooth endoplasmic reticulum		MHC class I peptide loading complex, endoplasmic reticulum membrane, endoplasmic reticulum quality control compartment, sarcoplasmic reticulum, sarcoplasmic reticulum lumen, smooth endoplasmic reticulum		extracellular space	Golgi apparatus, MHC class I peptide loading complex, acrosomal vesicle, endoplasmic reticulum membrane, endoplasmic reticulum quality control compartment, nuclear envelope, nucleus, sarcoplasmic reticulum, sarcoplasmic reticulum lumen, smooth endoplasmic reticulum	MHC class I peptide loading complex, endoplasmic reticulum membrane, external side of plasma membrane		nuclear envelope		MHC class I peptide loading complex, endoplasmic reticulum membrane, endoplasmic reticulum quality control compartment, nuclear envelope, sarcoplasmic reticulum lumen	external side of plasma membrane				androgen receptor binding, calcium ion binding, carbohydrate binding, hormone binding, integrin binding, iron ion binding, mRNA binding, peptide binding, ubiquitin protein ligase binding, unfolded protein binding								androgen receptor binding, calcium ion binding, carbohydrate binding, hormone binding, integrin binding, iron ion binding, mRNA binding, peptide binding, ubiquitin protein ligase binding, unfolded protein binding
Cluster of cAMP-dependent protein kinase catalytic subunit beta OS=Rattus norvegicus OX=10116 GN=Prkacb PE=1 SV=2 (KAPCB_RAT)	KAPCB_RAT [3]	41 kDa		G-protein coupled receptor signaling pathway, negative regulation of meiotic cell cycle, negative regulation of smoothened signaling pathway involved in dorsal/ventral neural tube patterning, protein kinase A signaling, regulation of protein processing		G-protein coupled receptor signaling pathway, protein kinase A signaling, protein phosphorylation	neural tube closure						protein phosphorylation		neural tube closure				G-protein coupled receptor signaling pathway, protein kinase A signaling, response to clozapine				cytosol, perinuclear region of cytoplasm	centrosome			intercellular bridge	centrosome, nucleus	plasma membrane		nucleus		centrosome, ciliary base	plasma membrane				ATP binding, magnesium ion binding, protein kinase A regulatory subunit binding, ubiquitin protein ligase binding	cAMP-dependent protein kinase activity							ATP binding, cAMP-dependent protein kinase activity, magnesium ion binding, protein kinase A regulatory subunit binding, ubiquitin protein ligase binding
Cluster of cAMP-dependent protein kinase type II-beta regulatory subunit OS=Rattus norvegicus OX=10116 GN=Prkar2b PE=1 SV=3 (KAP3_RAT)	KAP3_RAT [2]	46 kDa		cGMP-mediated signaling, modulation of synaptic transmission, regulation of protein kinase activity		cGMP-mediated signaling, fatty acid metabolic process							fatty acid metabolic process		learning				cGMP-mediated signaling, response to antipsychotic drug, response to clozapine				cytoplasm, cytosol, perinuclear region of cytoplasm	centrosome				centrosome	membrane raft, plasma membrane				centrosome, ciliary base	plasma membrane				cAMP binding, protein domain specific binding, protein kinase A catalytic subunit binding, ubiquitin protein ligase binding	3',5'-cyclic-GMP phosphodiesterase activity					cAMP-dependent protein kinase inhibitor activity, cAMP-dependent protein kinase regulator activity		3',5'-cyclic-GMP phosphodiesterase activity, cAMP binding, cAMP-dependent protein kinase inhibitor activity, cAMP-dependent protein kinase regulator activity, protein domain specific binding, protein kinase A catalytic subunit binding, ubiquitin protein ligase binding
Cluster of Carbonyl reductase [NADPH] 1-like OS=Rattus norvegicus OX=10116 GN=LOC102556347 PE=1 SV=1 (M0R3X6_RAT)	M0R3X6_RAT [2]	31 kDa
Cluster of Cathepsin D OS=Rattus norvegicus OX=10116 GN=Ctsd PE=1 SV=1 (Q6P6T6_RAT)	Q6P6T6_RAT [2]	45 kDa											protein catabolic process, proteolysis						response to nutrient levels				lysosome, melanosome				extracellular space	lysosome, melanosome										peptide binding	aspartic-type endopeptidase activity, endopeptidase activity							aspartic-type endopeptidase activity, endopeptidase activity, peptide binding
Cluster of Ceruloplasmin OS=Rattus norvegicus OX=10116 GN=Cp PE=1 SV=1 (A0A0G2K9I6_RAT)	A0A0G2K9I6_RAT [2]	124 kDa		cellular iron ion homeostasis, iron ion homeostasis		cellular iron ion homeostasis	aging, liver development, lung development	iron ion transport, plasma membrane copper ion transport			iron ion transport, plasma membrane copper ion transport				liver development, lung development				response to copper ion, response to nutrient								extracellular space		anchored component of plasma membrane, plasma membrane					anchored component of plasma membrane, plasma membrane				copper ion binding	ferroxidase activity							copper ion binding, ferroxidase activity
Cluster of Chaperonin containing Tcp1, subunit 6A (Zeta 1) OS=Rattus norvegicus OX=10116 GN=Cct6a PE=1 SV=1 (Q3MHS9_RAT)	Q3MHS9_RAT [2]	58 kDa
Cluster of Chloride intracellular channel protein OS=Rattus norvegicus OX=10116 GN=Clic6 PE=1 SV=1 (A0A0G2JTB6_RAT)	A0A0G2JTB6_RAT [2]	65 kDa
Cluster of Ciliary rootlet coiled-coil, rootletin OS=Rattus norvegicus OX=10116 GN=Crocc PE=1 SV=2 (F1M6Q2_RAT)	F1M6Q2_RAT [2]	225 kDa
Cluster of Clathrin coat assembly protein AP180 OS=Rattus norvegicus OX=10116 GN=Snap91 PE=1 SV=3 (F1LRK0_RAT)	F1LRK0_RAT [2]	94 kDa		membrane depolarization, negative regulation of phospholipase C activity, negative regulation of phospholipase D activity, positive regulation of axonogenesis, positive regulation of clathrin coat assembly, positive regulation of synaptic vesicle clustering, positive regulation of synaptic vesicle endocytosis, regulation of endocytosis, regulation of protein transport, regulation of terminal butt…		axonogenesis, clathrin coat assembly, establishment or maintenance of cell polarity, neuron development, positive regulation of axonogenesis, synaptic vesicle budding from presynaptic endocytic zone membrane	axonogenesis, neuron development, positive regulation of axonogenesis	clathrin-dependent endocytosis, protein transport, synaptic vesicle budding from presynaptic endocytic zone membrane, synaptic vesicle endocytosis			clathrin-dependent endocytosis, protein transport, synaptic vesicle budding from presynaptic endocytic zone membrane, synaptic vesicle endocytosis				axonogenesis, neuron development, positive regulation of axonogenesis								clathrin-coated vesicle, cytosol, synaptic vesicle					clathrin-coated vesicle, synaptic vesicle	clathrin-coated pit, extrinsic component of presynaptic endocytic zone membrane, plasma membrane, postsynaptic membrane, presynaptic active zone membrane, presynaptic membrane					extrinsic component of presynaptic endocytic zone membrane, postsynaptic membrane, presynaptic active zone membrane, presynaptic membrane				1-phosphatidylinositol binding, SH2 domain binding, SNARE binding, clathrin adaptor activity, clathrin heavy chain binding, inositol hexakisphosphate binding, phosphatidylinositol-4,5-bisphosphate binding, phospholipase binding								1-phosphatidylinositol binding, SH2 domain binding, SNARE binding, clathrin adaptor activity, clathrin heavy chain binding, inositol hexakisphosphate binding, phosphatidylinositol-4,5-bisphosphate binding, phospholipase binding
Cluster of Clathrin interactor 1 OS=Rattus norvegicus OX=10116 GN=Clint1 PE=1 SV=1 (Q6DGF2_RAT)	Q6DGF2_RAT [2]	52 kDa
Cluster of Clathrin light chain B OS=Rattus norvegicus OX=10116 GN=Cltb PE=1 SV=1 (CLCB_RAT)	CLCB_RAT [2]	25 kDa		neurotransmitter secretion		clathrin coat assembly, neurotransmitter secretion, synaptic vesicle coating		clathrin-dependent endocytosis, intracellular protein transport, neurotransmitter secretion, neurotransmitter transport, synaptic vesicle coating			clathrin-dependent endocytosis, intracellular protein transport, neurotransmitter secretion, neurotransmitter transport, synaptic vesicle coating											clathrin coat of trans-Golgi network vesicle, trans-Golgi network	clathrin coat of coated pit, clathrin coat of trans-Golgi network vesicle, cytosol, postsynaptic endocytic zone cytoplasmic component, synaptic vesicle membrane, trans-Golgi network					clathrin coat of trans-Golgi network vesicle, synaptic vesicle membrane, trans-Golgi network	ciliary membrane, clathrin coat of coated pit, clathrin coat of trans-Golgi network vesicle, plasma membrane, presynaptic endocytic zone membrane, synaptic vesicle membrane			ciliary membrane, clathrin coat of trans-Golgi network vesicle, synaptic vesicle membrane	ciliary membrane, clathrin coat of trans-Golgi network vesicle, synaptic vesicle membrane, trans-Golgi network	ciliary membrane, clathrin coat of coated pit, presynaptic endocytic zone membrane				clathrin heavy chain binding, peptide binding								clathrin heavy chain binding, neurotransmitter transporter activity, peptide binding, structural molecule activity
Cluster of Clathrin light chain OS=Rattus norvegicus OX=10116 GN=Clta PE=1 SV=1 (A0A0G2JYW3_RAT)	A0A0G2JYW3_RAT [2]	26 kDa				cell cycle, cell division, clathrin coat assembly		clathrin-dependent endocytosis, endocytosis, intracellular protein transport			clathrin-dependent endocytosis, endocytosis, intracellular protein transport											clathrin coat of trans-Golgi network vesicle	clathrin coat of coated pit, clathrin coat of trans-Golgi network vesicle, clathrin complex, clathrin-coated endocytic vesicle membrane, clathrin-coated vesicle, postsynaptic endocytic zone cytoplasmic component, synaptic vesicle membrane	spindle				clathrin coat of trans-Golgi network vesicle, clathrin-coated endocytic vesicle membrane, clathrin-coated vesicle, spindle, synaptic vesicle membrane	clathrin coat of coated pit, clathrin coat of trans-Golgi network vesicle, clathrin complex, clathrin-coated endocytic vesicle membrane, clathrin-coated pit, plasma membrane, presynaptic endocytic zone membrane, synaptic vesicle membrane			clathrin coat of trans-Golgi network vesicle, clathrin-coated endocytic vesicle membrane, synaptic vesicle membrane	clathrin coat of trans-Golgi network vesicle, clathrin-coated endocytic vesicle membrane, spindle, synaptic vesicle membrane	clathrin coat of coated pit, presynaptic endocytic zone membrane				GTPase binding, clathrin heavy chain binding, macromolecular complex binding, peptide binding								GTPase binding, clathrin heavy chain binding, macromolecular complex binding, peptide binding, structural molecule activity
Cluster of Collagen alpha-1(II) chain OS=Rattus norvegicus OX=10116 GN=Col2a1 PE=1 SV=2 (CO2A1_RAT)	CO2A1_RAT [2]	135 kDa				cellular response to insulin-like growth factor stimulus, cellular response to mechanical stimulus, cellular response to nicotine, cellular response to parathyroid hormone stimulus, cellular response to peptide hormone stimulus, cellular response to retinoic acid, cellular response to tumor necrosis factor, cellular response to vitamin E, chondrocyte differentiation, collagen fibril organization	cartilage development, cartilage development involved in endochondral bone morphogenesis, chondrocyte differentiation, growth plate cartilage development, notochord development, skeletal system development		growth plate cartilage development						cartilage development involved in endochondral bone morphogenesis, chondrocyte differentiation, growth plate cartilage development, notochord development, skeletal system development				cellular response to insulin-like growth factor stimulus, cellular response to mechanical stimulus, cellular response to nicotine, cellular response to parathyroid hormone stimulus, cellular response to peptide hormone stimulus, cellular response to retinoic acid, cellular response to tumor necrosis factor, cellular response to vitamin E, response to X-ray, response to fibroblast growth factor				cytoplasm				collagen type II trimer, extracellular matrix, extracellular space											metal ion binding								extracellular matrix structural constituent, metal ion binding
Cluster of Complement C3 OS=Rattus norvegicus OX=10116 GN=C3 PE=1 SV=1 (M0RBF1_RAT)	M0RBF1_RAT [3]	186 kDa
Cluster of Creatine kinase B-type OS=Rattus norvegicus OX=10116 GN=Ckb PE=1 SV=2 (KCRB_RAT)	KCRB_RAT [4]	43 kDa		cellular chloride ion homeostasis		cellular chloride ion homeostasis, phosphocreatine biosynthetic process	brain development, cerebellum development, heart development, skeletal muscle tissue development						phosphocreatine biosynthetic process		brain development, cerebellum development, heart development, skeletal muscle tissue development								cytosol, mitochondrial inner membrane, mitochondrion				extracellular space	mitochondrial inner membrane, mitochondrion, nucleus	mitochondrial inner membrane	mitochondrial inner membrane	nucleus	mitochondrial inner membrane	mitochondrial inner membrane					ATP binding, cardiolipin binding, ubiquitin protein ligase binding	creatine kinase activity							ATP binding, cardiolipin binding, creatine kinase activity, ubiquitin protein ligase binding
Cluster of C-terminal-binding protein 2 OS=Rattus norvegicus OX=10116 GN=Ctbp2 PE=1 SV=2 (CTBP2_RAT)	CTBP2_RAT [2]	49 kDa		negative regulation of transcription, DNA-templated, positive regulation of chromatin binding, positive regulation of retinoic acid receptor signaling pathway, positive regulation of transcription from RNA polymerase II promoter, synaptic vesicle docking		cellular response to leukemia inhibitory factor, synaptic vesicle docking, white fat cell differentiation	white fat cell differentiation	synaptic vesicle docking			synaptic vesicle docking								cellular response to leukemia inhibitory factor				presynaptic active zone cytoplasmic component, presynaptic cytosol					nucleus			nucleus							NAD binding, chromatin binding, macromolecular complex binding, protein kinase binding, retinoic acid receptor binding	oxidoreductase activity, acting on the CH-OH group of donors, NAD or NADP as acceptor							NAD binding, chromatin binding, macromolecular complex binding, oxidoreductase activity, acting on the CH-OH group of donors, NAD or NADP as acceptor, protein kinase binding, retinoic acid receptor binding, structural constituent of presynaptic active zone, transcription coactivator activity, transcription corepressor activity
Cluster of Cyclic nucleotide-gated channel beta 1 OS=Rattus norvegicus OX=10116 GN=Cngb1 PE=4 SV=1 (A0A0G2JXF2_RAT)	A0A0G2JXF2_RAT [2]	33 kDa
Cluster of Cysteine-rich protein 2 OS=Rattus norvegicus OX=10116 GN=Crip2 PE=2 SV=1 (CRIP2_RAT)	CRIP2_RAT [2]	23 kDa																																				metal ion binding								metal ion binding
Cluster of Cytoplasmic dynein 1 intermediate chain 2 OS=Rattus norvegicus OX=10116 GN=Dync1i2 PE=1 SV=1 (Q6AZ35_RAT)	Q6AZ35_RAT [2]	71 kDa
Cluster of D-dopachrome decarboxylase OS=Rattus norvegicus OX=10116 GN=Ddt PE=1 SV=3 (DOPD_RAT)	DOPD_RAT [2]	13 kDa		positive regulation of inflammatory response		melanin biosynthetic process							melanin biosynthetic process						inflammatory response				cytoplasm				extracellular space											protease binding	D-dopachrome decarboxylase activity, dopachrome isomerase activity							D-dopachrome decarboxylase activity, dopachrome isomerase activity, protease binding
Cluster of DEAD-box helicase 17 OS=Rattus norvegicus OX=10116 GN=Ddx17 PE=1 SV=3 (E9PT29_RAT)	E9PT29_RAT [2]	72 kDa
Cluster of DEAD-box helicase 3, X-linked OS=Rattus norvegicus OX=10116 GN=Ddx3x PE=1 SV=1 (A0A0G2K719_RAT)	A0A0G2K719_RAT [2]	73 kDa
Cluster of Disks large homolog 2 OS=Rattus norvegicus OX=10116 GN=Dlg2 PE=1 SV=3 (F1M907_RAT)	F1M907_RAT [6]	87 kDa
Cluster of DNA damage-binding protein 1 OS=Rattus norvegicus OX=10116 GN=Ddb1 PE=1 SV=1 (G3V8T4_RAT)	G3V8T4_RAT [2]	127 kDa				DNA repair, proteasome-mediated ubiquitin-dependent protein catabolic process, protein ubiquitination							DNA repair, proteasome-mediated ubiquitin-dependent protein catabolic process, protein ubiquitination						DNA repair				cytoplasm					nucleus			nucleus							damaged DNA binding								damaged DNA binding
Cluster of Dual specificity mitogen-activated protein kinase kinase 1 OS=Rattus norvegicus OX=10116 GN=Map2k1 PE=1 SV=2 (MP2K1_RAT)	MP2K1_RAT [2]	43 kDa		ERK1 and ERK2 cascade, activation of MAPK activity, activation of protein kinase activity, glucose homeostasis, intracellular signal transduction, negative regulation of gene expression, negative regulation of homotypic cell-cell adhesion, negative regulation of hypoxia-induced intrinsic apoptotic signaling pathway, positive regulation of ATP biosynthetic process, positive regulation of GTPase ac…		ERK1 and ERK2 cascade, Golgi inheritance, intracellular signal transduction, melanosome transport, mitotic cell cycle, neuron differentiation, neuron projection morphogenesis, peptidyl-serine autophosphorylation, positive regulation of axonogenesis, protein heterooligomerization, regulation of axon regeneration, signal transduction by protein phosphorylation, vesicle transport along microtubule	epithelial cell proliferation involved in lung morphogenesis, face development, heart development, neuron differentiation, neuron projection morphogenesis, positive regulation of axonogenesis, regulation of axon regeneration, thymus development, thyroid gland development, trachea formation	melanosome transport, vesicle transport along microtubule		thymus development	melanosome transport, vesicle transport along microtubule		ERK1 and ERK2 cascade, peptidyl-serine autophosphorylation, signal transduction by protein phosphorylation		epithelial cell proliferation involved in lung morphogenesis, heart development, neuron projection morphogenesis, positive regulation of axonogenesis, regulation of axon regeneration, regulation of vascular smooth muscle contraction, thymus development, thyroid gland development, trachea formation	melanosome transport			ERK1 and ERK2 cascade, intracellular signal transduction, response to axon injury, response to glucocorticoid, response to oxidative stress, signal transduction by protein phosphorylation			Golgi apparatus	Golgi apparatus, cell cortex, cytosol, dendrite cytoplasm, early endosome, endoplasmic reticulum, late endosome, mitochondrion, perinuclear region of cytoplasm	microtubule, microtubule organizing center	endoplasmic reticulum	early endosome, late endosome		Golgi apparatus, early endosome, endoplasmic reticulum, late endosome, microtubule, microtubule organizing center, mitochondrion, nucleus	cytoplasmic side of plasma membrane, plasma membrane	mitochondrion	nucleus		microtubule, microtubule organizing center	cytoplasmic side of plasma membrane, plasma membrane				ATP binding, PDZ domain binding, Ras GTPase binding, binding, bridging, metal ion binding, mitogen-activated protein kinase kinase kinase binding, protein kinase binding, scaffold protein binding	MAP kinase kinase activity, protein serine/threonine kinase activity, protein serine/threonine/tyrosine kinase activity, protein tyrosine kinase activity					protein serine/threonine kinase activator activity		ATP binding, MAP kinase kinase activity, PDZ domain binding, Ras GTPase binding, binding, bridging, metal ion binding, mitogen-activated protein kinase kinase kinase binding, protein kinase binding, protein serine/threonine kinase activator activity, protein serine/threonine kinase activity, protein serine/threonine/tyrosine kinase activity, protein tyrosine kinase activity, scaffold protein bind…
Cluster of Dynactin 1, isoform CRA_a OS=Rattus norvegicus OX=10116 GN=Dctn1 PE=1 SV=2 (D4A8U7_RAT)	D4A8U7_RAT [3]	142 kDa
Cluster of Dynamin-1 OS=Rattus norvegicus OX=10116 GN=Dnm1 PE=1 SV=2 (DYN1_RAT)	DYN1_RAT [3]	97 kDa		G-protein coupled receptor internalization, modulation of synaptic transmission, positive regulation of synaptic vesicle endocytosis, positive regulation of synaptic vesicle recycling, postsynaptic neurotransmitter receptor internalization, regulation of synapse structure or activity		G-protein coupled receptor internalization, endosome organization, mitochondrial fission, postsynaptic neurotransmitter receptor internalization, synaptic vesicle budding from presynaptic endocytic zone membrane		G-protein coupled receptor internalization, postsynaptic neurotransmitter receptor internalization, synaptic vesicle budding from presynaptic endocytic zone membrane, toxin transport			G-protein coupled receptor internalization, postsynaptic neurotransmitter receptor internalization, synaptic vesicle budding from presynaptic endocytic zone membrane, toxin transport		G-protein coupled receptor internalization, postsynaptic neurotransmitter receptor internalization						response to beta-amyloid			Golgi apparatus	Golgi apparatus, cytoplasmic vesicle, membrane coat, synaptic vesicle	microtubule				Golgi apparatus, cytoplasmic vesicle, microtubule, nucleoplasm, synaptic vesicle	membrane coat, plasma membrane, postsynaptic endocytic zone membrane, postsynaptic membrane, presynaptic endocytic zone membrane		nucleoplasm		microtubule, nucleoplasm	postsynaptic endocytic zone membrane, postsynaptic membrane, presynaptic endocytic zone membrane				D2 dopamine receptor binding, GTP binding, SH3 domain binding, identical protein binding, macromolecular complex binding, microtubule binding, nitric-oxide synthase binding, protein C-terminus binding, protein kinase binding	GTPase activity							D2 dopamine receptor binding, GTP binding, GTPase activity, SH3 domain binding, identical protein binding, macromolecular complex binding, microtubule binding, nitric-oxide synthase binding, protein C-terminus binding, protein kinase binding
Cluster of EH domain-containing protein 1 OS=Rattus norvegicus OX=10116 GN=Ehd1 PE=1 SV=1 (EHD1_RAT)	EHD1_RAT [3]	61 kDa		cholesterol homeostasis, low-density lipoprotein particle clearance, positive regulation of cholesterol storage, positive regulation of endocytic recycling, positive regulation of myoblast fusion, positive regulation of neuron projection development		cellular response to nerve growth factor stimulus, cilium assembly, neuron projection development, positive regulation of neuron projection development	neuron projection development, positive regulation of neuron projection development	endocytic recycling, endocytosis, intracellular protein transport			endocytic recycling, endocytosis, intracellular protein transport, protein localization to cilium				low-density lipoprotein particle clearance, neuron projection development, positive regulation of neuron projection development				cellular response to nerve growth factor stimulus				early endosome membrane, endocytic vesicle, perinuclear region of cytoplasm, recycling endosome membrane			early endosome membrane, recycling endosome membrane		early endosome membrane, endocytic vesicle, lipid particle, platelet dense tubular network membrane, recycling endosome membrane	ciliary pocket membrane, early endosome membrane, plasma membrane, platelet dense tubular network membrane, recycling endosome membrane			ciliary pocket membrane, early endosome membrane, platelet dense tubular network membrane, recycling endosome membrane	ciliary pocket membrane, early endosome membrane, platelet dense tubular network membrane, recycling endosome membrane	ciliary pocket membrane, plasma membrane				ATP binding, GTP binding, calcium ion binding								ATP binding, GTP binding, calcium ion binding
Cluster of Elongation factor 1-alpha 2 OS=Rattus norvegicus OX=10116 GN=Eef1a2 PE=1 SV=1 (EF1A2_RAT)	EF1A2_RAT [3]	50 kDa		negative regulation of reactive oxygen species biosynthetic process, positive regulation of apoptotic process, positive regulation of cell death, positive regulation of lipid kinase activity, positive regulation of neuron projection development, regulation of D-erythro-sphingosine kinase activity		cellular response to drug, cellular response to epidermal growth factor stimulus, cellular response to nerve growth factor stimulus, positive regulation of neuron projection development, protein homooligomerization, translation, translational elongation	aging, positive regulation of neuron projection development						translation, translational elongation		positive regulation of neuron projection development				cellular response to drug, cellular response to epidermal growth factor stimulus, cellular response to nerve growth factor stimulus, response to electrical stimulus, response to inorganic substance				cytoplasm, cytosol, eukaryotic translation elongation factor 1 complex					nucleolus, nucleus	plasma membrane		nucleolus		nucleolus	plasma membrane				GTP binding, drug binding, mRNA binding, protein kinase binding, translation elongation factor activity	GTPase activity							GTP binding, GTPase activity, drug binding, mRNA binding, protein kinase binding, translation elongation factor activity
Cluster of Endoplasmin OS=Rattus norvegicus OX=10116 GN=Hsp90b1 PE=1 SV=1 (A0A0A0MY09_RAT)	A0A0A0MY09_RAT [2]	93 kDa
Cluster of Enhancer of rudimentary homolog OS=Rattus norvegicus OX=10116 GN=Erh PE=1 SV=1 (B2RYQ5_RAT)	B2RYQ5_RAT [2]	12 kDa
Cluster of Erythrocyte membrane protein band 4.1-like 2 OS=Rattus norvegicus OX=10116 GN=Epb41l2 PE=1 SV=2 (D3ZM69_RAT)	D3ZM69_RAT [3]	111 kDa
Cluster of Erythrocyte membrane protein band 4.1-like 3 OS=Rattus norvegicus OX=10116 GN=Epb41l3 PE=1 SV=1 (A0A0G2K1Q9_RAT)	A0A0G2K1Q9_RAT [3]	103 kDa
Cluster of Eukaryotic peptide chain release factor GTP-binding subunit ERF3B-like OS=Rattus norvegicus OX=10116 GN=Gspt1 PE=1 SV=1 (Q6AYD5_RAT)	Q6AYD5_RAT [2]	69 kDa
Cluster of Eukaryotic translation elongation factor 1 beta 2 OS=Rattus norvegicus OX=10116 GN=Eef1b2 PE=1 SV=1 (B5DEN5_RAT)	B5DEN5_RAT [2]	25 kDa
Cluster of Eukaryotic translation initiation factor 1 OS=Rattus norvegicus OX=10116 GN=Eif1 PE=1 SV=1 (B0K008_RAT)	B0K008_RAT [2]	13 kDa
Cluster of Eukaryotic translation initiation factor 3 subunit I OS=Rattus norvegicus OX=10116 GN=Eif3i PE=2 SV=1 (EIF3I_RAT)	EIF3I_RAT [2]	36 kDa				formation of cytoplasmic translation initiation complex, translational initiation							formation of cytoplasmic translation initiation complex, translational initiation										eukaryotic 43S preinitiation complex, eukaryotic 48S preinitiation complex, eukaryotic translation initiation factor 3 complex															enzyme binding, translation initiation factor activity								enzyme binding, translation initiation factor activity
Cluster of Eukaryotic translation initiation factor 4A1 OS=Rattus norvegicus OX=10116 GN=Eif4a1 PE=1 SV=1 (Q6P3V8_RAT)	Q6P3V8_RAT [2]	46 kDa		negative regulation of RNA-directed 5'-3' RNA polymerase activity		cellular response to leukemia inhibitory factor, cytoplasmic translational initiation							cytoplasmic translational initiation						cellular response to leukemia inhibitory factor				perinuclear region of cytoplasm															ATP binding, translation initiation factor activity	RNA helicase activity							ATP binding, RNA helicase activity, translation initiation factor activity
Cluster of Eukaryotic translation initiation factor 5A-1 OS=Rattus norvegicus OX=10116 GN=Eif5a PE=1 SV=3 (IF5A1_RAT)	IF5A1_RAT [2]	17 kDa		negative regulation of apoptotic process, positive regulation of cardiac muscle cell apoptotic process, positive regulation of cytosolic calcium ion concentration, positive regulation of muscle cell differentiation, positive regulation of reactive oxygen species metabolic process, positive regulation of translational elongation, positive regulation of translational termination		cellular response to thyroid hormone stimulus, positive regulation of cytosolic calcium ion concentration, translational frameshifting	aging	mRNA transport, protein transport			mRNA transport, protein transport		translational frameshifting						cellular response to thyroid hormone stimulus				endoplasmic reticulum membrane		endoplasmic reticulum membrane			endoplasmic reticulum membrane, nuclear pore	endoplasmic reticulum membrane		nuclear pore		endoplasmic reticulum membrane, nuclear pore					ribosome binding, translation elongation factor activity								ribosome binding, translation elongation factor activity
Cluster of F-actin-capping protein subunit beta OS=Rattus norvegicus OX=10116 GN=Capzb PE=1 SV=1 (A0A0G2JYB1_RAT)	A0A0G2JYB1_RAT [2]	33 kDa		barbed-end actin filament capping, negative regulation of filopodium assembly, regulation of cell morphogenesis, regulation of lamellipodium assembly		actin cytoskeleton organization, barbed-end actin filament capping, cell morphogenesis	cell morphogenesis																WASH complex, sarcomere	F-actin capping protein complex				F-actin capping protein complex, sarcomere					F-actin capping protein complex, sarcomere					actin filament binding								actin filament binding
Cluster of Far upstream element-binding protein 1 OS=Rattus norvegicus OX=10116 GN=Fubp1 PE=1 SV=1 (A0A140TAJ3_RAT)	A0A140TAJ3_RAT [3]	68 kDa
Cluster of Farnesyl pyrophosphate synthase OS=Rattus norvegicus OX=10116 GN=Fdps PE=1 SV=1 (A0A0G2JXT3_RAT)	A0A0G2JXT3_RAT [2]	49 kDa
Cluster of Fascin OS=Rattus norvegicus OX=10116 GN=Fscn1 PE=1 SV=2 (FSCN1_RAT)	FSCN1_RAT [2]	54 kDa		positive regulation of extracellular matrix disassembly, positive regulation of filopodium assembly, positive regulation of lamellipodium assembly, positive regulation of podosome assembly, regulation of actin cytoskeleton organization, regulation of microvillus assembly		actin filament bundle assembly, cell migration, cell motility, cell-cell junction assembly, cellular response to cell-matrix adhesion, establishment of apical/basal cell polarity, establishment or maintenance of cell polarity, microspike assembly	liver development				cell migration, cell motility	cell migration, cell motility			liver development				cellular response to cell-matrix adhesion				cell cortex, cytosol	podosome, stress fiber				podosome, stress fiber	cell projection membrane, plasma membrane				podosome, stress fiber	cell projection membrane				actin filament binding, protein binding, bridging								actin filament binding, protein binding, bridging
Cluster of Fructose-bisphosphate aldolase C OS=Rattus norvegicus OX=10116 GN=Aldoc PE=1 SV=3 (ALDOC_RAT)	ALDOC_RAT [7]	39 kDa				apoptotic process, fructose 1,6-bisphosphate metabolic process, glycolytic process, methylglyoxal biosynthetic process, protein heterotetramerization, protein homotetramerization	aging, animal organ regeneration						fructose 1,6-bisphosphate metabolic process, glycolytic process, methylglyoxal biosynthetic process	response to lipopolysaccharide	animal organ regeneration				response to estrogen, response to heat, response to hypoxia, response to lipopolysaccharide, response to nicotine, response to organonitrogen compound				I band, M band, mitochondrion, postsynaptic cytosol					I band, M band, mitochondrion, nuclear heterochromatin		mitochondrion	nuclear heterochromatin		I band, M band, nuclear heterochromatin						fructose-bisphosphate aldolase activity							fructose-bisphosphate aldolase activity
Cluster of G protein subunit alpha transducin 1 OS=Rattus norvegicus OX=10116 GN=Gnat1 PE=4 SV=1 (D3ZSS5_RAT)	D3ZSS5_RAT [12]	40 kDa		G-protein coupled acetylcholine receptor signaling pathway, adenosine receptor signaling pathway, adenylate cyclase-activating adrenergic receptor signaling pathway, adenylate cyclase-activating dopamine receptor signaling pathway, adenylate cyclase-inhibiting G-protein coupled receptor signaling pathway, calcium ion homeostasis, dopamine receptor signaling pathway, gamma-aminobutyric acid signal…		G-protein coupled acetylcholine receptor signaling pathway, adenosine receptor signaling pathway, adenylate cyclase-activating adrenergic receptor signaling pathway, adenylate cyclase-activating dopamine receptor signaling pathway, adenylate cyclase-inhibiting G-protein coupled receptor signaling pathway, cell cycle, cell division, cellular response to catecholamine stimulus, cellular response to…	aging, forebrain development, neuron projection development, odontogenesis of dentin-containing tooth								forebrain development, negative regulation of blood pressure, neuron projection development, odontogenesis of dentin-containing tooth, positive regulation of urine volume				G-protein coupled acetylcholine receptor signaling pathway, adenosine receptor signaling pathway, adenylate cyclase-activating adrenergic receptor signaling pathway, adenylate cyclase-activating dopamine receptor signaling pathway, adenylate cyclase-inhibiting G-protein coupled receptor signaling pathway, cellular response to catecholamine stimulus, cellular response to forskolin, cellular respon…			Golgi to ER transport vesicle	Golgi to ER transport vesicle, cell cortex region, cytosol, endosome, perinuclear region of cytoplasm, recycling endosome	centrosome		endosome, recycling endosome		Golgi to ER transport vesicle, centrosome, endosome, nucleolus, nucleoplasm, nucleus, recycling endosome	heterotrimeric G-protein complex, membrane raft, plasma membrane		nucleolus, nucleoplasm		Golgi to ER transport vesicle, centrosome, nucleolus, nucleoplasm	heterotrimeric G-protein complex, plasma membrane				D1 dopamine receptor binding, G-protein alpha-subunit binding, G-protein beta-subunit binding, G-protein beta/gamma-subunit complex binding, G-protein coupled serotonin receptor binding, GDP binding, GTP binding, GTPase activating protein binding, alpha-tubulin binding, beta-2 adrenergic receptor binding, corticotropin-releasing hormone receptor 1 binding, insulin-like growth factor receptor bind…	GTPase activity, alkylglycerophosphoethanolamine phosphodiesterase activity					adenylate cyclase activator activity		D1 dopamine receptor binding, G-protein alpha-subunit binding, G-protein beta-subunit binding, G-protein beta/gamma-subunit complex binding, G-protein coupled serotonin receptor binding, GDP binding, GTP binding, GTPase activating protein binding, GTPase activity, adenylate cyclase activator activity, alkylglycerophosphoethanolamine phosphodiesterase activity, alpha-tubulin binding, beta-2 adrene…
Cluster of Gephyrin OS=Rattus norvegicus OX=10116 GN=Gphn PE=1 SV=3 (GEPH_RAT)	GEPH_RAT [3]	83 kDa		neurotransmitter receptor localization to postsynaptic specialization membrane, postsynaptic neurotransmitter receptor diffusion trapping		Mo-molybdopterin cofactor biosynthetic process, establishment of synaptic specificity at neuromuscular junction, gamma-aminobutyric acid receptor clustering, glycine receptor clustering, molybdenum incorporation into molybdenum-molybdopterin complex, molybdopterin cofactor biosynthetic process, protein homooligomerization, synapse assembly	synapse assembly	establishment of protein localization, protein targeting			establishment of protein localization, gamma-aminobutyric acid receptor clustering, glycine receptor clustering, neurotransmitter receptor localization to postsynaptic specialization membrane, postsynaptic neurotransmitter receptor diffusion trapping, protein targeting		Mo-molybdopterin cofactor biosynthetic process, molybdenum incorporation into molybdenum-molybdopterin complex, molybdopterin cofactor biosynthetic process		synapse assembly								cytoplasm, cytosol	cytoskeleton				cytoskeleton	extrinsic component of cytoplasmic side of plasma membrane, postsynaptic membrane, postsynaptic specialization membrane				postsynaptic specialization membrane, postsynaptic specialization, intracellular component	extrinsic component of cytoplasmic side of plasma membrane, postsynaptic membrane, postsynaptic specialization membrane				ATP binding, binding, bridging, metal ion binding, protein binding, bridging, protein homodimerization activity, receptor binding, tubulin binding	molybdopterin adenylyltransferase activity, molybdopterin molybdotransferase activity							ATP binding, binding, bridging, metal ion binding, molybdopterin adenylyltransferase activity, molybdopterin molybdotransferase activity, protein binding, bridging, protein homodimerization activity, receptor binding, tubulin binding
Cluster of Globin a4 OS=Rattus norvegicus OX=10116 GN=Hbb PE=1 SV=1 (A0A0G2JSW3_RAT)	A0A0G2JSW3_RAT [4]	16 kDa				cellular oxidant detoxification, hydrogen peroxide catabolic process							hydrogen peroxide catabolic process						cellular oxidant detoxification				hemoglobin complex															heme binding, hemoglobin alpha binding, metal ion binding, organic acid binding, oxygen binding								heme binding, hemoglobin alpha binding, metal ion binding, organic acid binding, oxygen binding, oxygen transporter activity
Cluster of Glucan (1,4-alpha-), branching enzyme 1 (Fragment) OS=Rattus norvegicus OX=10116 GN=Gbe1 PE=1 SV=1 (A0A096MJY6_RAT)	A0A096MJY6_RAT [2]	47 kDa
Cluster of Glutaminase kidney isoform, mitochondrial OS=Rattus norvegicus OX=10116 GN=Gls PE=1 SV=2 (GLSK_RAT)	GLSK_RAT [2]	74 kDa				glutamate biosynthetic process, glutamine catabolic process, protein homotetramerization							glutamate biosynthetic process, glutamine catabolic process										cytosol, mitochondrial matrix, mitochondrion					mitochondrial matrix, mitochondrion		mitochondrial matrix			mitochondrial matrix						glutaminase activity							glutaminase activity
Cluster of Glutathione S-transferase alpha-3 OS=Rattus norvegicus OX=10116 GN=Gsta3 PE=1 SV=3 (GSTA3_RAT)	GSTA3_RAT [8]	25 kDa				cellular response to lithium ion, glutathione metabolic process, xenobiotic catabolic process, xenobiotic metabolic process	aging						glutathione metabolic process, xenobiotic catabolic process, xenobiotic metabolic process						cellular response to lithium ion, response to drug, response to herbicide, response to nicotine, response to nutrient levels, response to zinc ion, xenobiotic catabolic process, xenobiotic metabolic process				cytosol, mitochondrion					mitochondrion, nuclear outer membrane, nucleus	nuclear outer membrane	mitochondrion	nuclear outer membrane	nuclear outer membrane	nuclear outer membrane					drug binding, glutathione binding	glutathione transferase activity							drug binding, glutathione binding, glutathione transferase activity
Cluster of Glutathione S-transferase Mu 1 OS=Rattus norvegicus OX=10116 GN=Gstm1 PE=1 SV=2 (G3V983_RAT)	G3V983_RAT [3]	26 kDa				glutathione metabolic process, xenobiotic catabolic process							glutathione metabolic process, xenobiotic catabolic process		sensory perception of smell				response to amino acid, response to antibiotic, response to axon injury, response to drug, response to ethanol, response to lead ion, response to lithium ion, xenobiotic catabolic process				cytosol				extracellular region											glutathione binding, nickel cation binding, protein homodimerization activity, protein kinase binding, steroid binding	glutathione transferase activity							glutathione binding, glutathione transferase activity, nickel cation binding, protein homodimerization activity, protein kinase binding, steroid binding
Cluster of Glutathione S-transferase P OS=Rattus norvegicus OX=10116 GN=Gstp1 PE=1 SV=2 (GSTP1_RAT)	GSTP1_RAT [2]	23 kDa		negative regulation of ERK1 and ERK2 cascade, negative regulation of I-kappaB kinase/NF-kappaB signaling, negative regulation of JUN kinase activity, negative regulation of extrinsic apoptotic signaling pathway, negative regulation of fibroblast proliferation, negative regulation of interleukin-1 beta production, negative regulation of leukocyte proliferation, negative regulation of monocyte chem…		cellular response to cell-matrix adhesion, cellular response to epidermal growth factor stimulus, cellular response to glucocorticoid stimulus, cellular response to insulin stimulus, cellular response to lipopolysaccharide, glutathione metabolic process, linoleic acid metabolic process, oligodendrocyte development, xenobiotic metabolic process	animal organ regeneration, oligodendrocyte development						glutathione metabolic process, linoleic acid metabolic process, xenobiotic metabolic process	cellular response to lipopolysaccharide	animal organ regeneration, oligodendrocyte development				cellular response to cell-matrix adhesion, cellular response to epidermal growth factor stimulus, cellular response to glucocorticoid stimulus, cellular response to insulin stimulus, cellular response to lipopolysaccharide, response to L-ascorbic acid, response to amino acid, response to estradiol, response to ethanol, response to nutrient levels, response to reactive oxygen species, response to …				cytosol, mitochondrion					mitochondrion, nucleus	plasma membrane	mitochondrion	nucleus			plasma membrane		glutathione peroxidase activity		JUN kinase binding, S-nitrosoglutathione binding, dinitrosyl-iron complex binding, drug binding, glutathione binding, protein kinase binding	glutathione peroxidase activity, glutathione transferase activity					kinase regulator activity		JUN kinase binding, S-nitrosoglutathione binding, dinitrosyl-iron complex binding, drug binding, glutathione binding, glutathione peroxidase activity, glutathione transferase activity, kinase regulator activity, protein kinase binding
Cluster of Glutathione S-transferase Yb-3 OS=Rattus norvegicus OX=10116 GN=Gstm3 PE=1 SV=2 (GSTM4_RAT)	GSTM4_RAT [2]	26 kDa				glutathione metabolic process, xenobiotic catabolic process, xenobiotic metabolic process	aging						glutathione metabolic process, xenobiotic catabolic process, xenobiotic metabolic process		sensory perception of smell				response to catechin, response to genistein, response to metal ion, xenobiotic catabolic process, xenobiotic metabolic process				cytoplasm, cytosol						plasma membrane					plasma membrane				glutathione binding, protein homodimerization activity	glutathione transferase activity							glutathione binding, glutathione transferase activity, protein homodimerization activity
Cluster of Glycine cleavage system H protein, mitochondrial OS=Rattus norvegicus OX=10116 GN=Gcsh PE=2 SV=1 (GCSH_RAT)	GCSH_RAT [2]	18 kDa				glycine decarboxylation via glycine cleavage system, protein lipoylation							glycine decarboxylation via glycine cleavage system, protein lipoylation										glycine cleavage complex, mitochondrion					mitochondrion		mitochondrion								enzyme binding	aminomethyltransferase activity							aminomethyltransferase activity, enzyme binding
Cluster of Glycogenin-1 OS=Rattus norvegicus OX=10116 GN=Gyg1 PE=1 SV=1 (F8WFR6_RAT)	F8WFR6_RAT [3]	37 kDa
Cluster of GMP synthase [glutamine-hydrolyzing] OS=Rattus norvegicus OX=10116 GN=Gmps PE=1 SV=1 (GUAA_RAT)	GUAA_RAT [2]	77 kDa				GMP biosynthetic process, glutamine metabolic process							GMP biosynthetic process, glutamine metabolic process						response to L-cysteine, response to drug				cytosol															ATP binding, enzyme binding	GMP synthase (glutamine-hydrolyzing) activity, GMP synthase activity, pyrophosphatase activity							ATP binding, GMP synthase (glutamine-hydrolyzing) activity, GMP synthase activity, enzyme binding, pyrophosphatase activity
Cluster of Granulin, isoform CRA_c OS=Rattus norvegicus OX=10116 GN=Grn PE=4 SV=1 (G3V8V1_RAT)	G3V8V1_RAT [3]	65 kDa
Cluster of GTP-binding nuclear protein Ran OS=Rattus norvegicus OX=10116 GN=Ran PE=1 SV=3 (RAN_RAT)	RAN_RAT [2]	24 kDa		regulation of protein binding		GTP metabolic process, cell division, cellular response to mineralocorticoid stimulus, microtubule cytoskeleton organization, mitotic sister chromatid segregation, spermatid development	hippocampus development, spermatid development	nucleocytoplasmic transport, protein export from nucleus, protein import into nucleus, snRNA import into nucleus			nucleocytoplasmic transport, protein export from nucleus, protein import into nucleus, snRNA import into nucleus		GTP metabolic process	spermatid development	hippocampus development, spermatid development		spermatid development	spermatid development	cellular response to mineralocorticoid stimulus, response to organic cyclic compound				cytosol, melanosome	manchette				male germ cell nucleus, manchette, melanosome, nuclear pore			male germ cell nucleus, nuclear pore		manchette, nuclear pore					GDP binding, GTP binding, dynein intermediate chain binding, importin-alpha family protein binding, macromolecular complex binding, magnesium ion binding, protein domain specific binding	GTPase activity							GDP binding, GTP binding, GTPase activity, dynein intermediate chain binding, importin-alpha family protein binding, macromolecular complex binding, magnesium ion binding, protein domain specific binding
Cluster of Guanine nucleotide-binding protein G(I)/G(S)/G(T) subunit beta-1 OS=Rattus norvegicus OX=10116 GN=Gnb1 PE=1 SV=4 (GBB1_RAT)	GBB1_RAT [3]	37 kDa		G-protein coupled receptor signaling pathway, phospholipase C-activating G-protein coupled receptor signaling pathway, positive regulation of cytosolic calcium ion concentration		G-protein coupled receptor signaling pathway, cardiac muscle cell apoptotic process, cellular response to hypoxia, phospholipase C-activating G-protein coupled receptor signaling pathway, positive regulation of cytosolic calcium ion concentration	retina development in camera-type eye								retina development in camera-type eye, sensory perception of taste				G-protein coupled receptor signaling pathway, cellular response to hypoxia, phospholipase C-activating G-protein coupled receptor signaling pathway				perinuclear region of cytoplasm						heterotrimeric G-protein complex, photoreceptor outer segment membrane			photoreceptor outer segment membrane	photoreceptor outer segment membrane	heterotrimeric G-protein complex, photoreceptor outer segment membrane				GTPase binding, macromolecular complex binding, spectrin binding	GTPase activity, alkylglycerophosphoethanolamine phosphodiesterase activity							GTPase activity, GTPase binding, alkylglycerophosphoethanolamine phosphodiesterase activity, calcium channel regulator activity, macromolecular complex binding, spectrin binding
Cluster of Guanylate cyclase OS=Rattus norvegicus OX=10116 GN=Gucy2d PE=3 SV=1 (V9GZ79_RAT)	V9GZ79_RAT [2]	121 kDa		cGMP-mediated signaling, receptor guanylyl cyclase signaling pathway		cGMP biosynthetic process, cGMP-mediated signaling, receptor guanylyl cyclase signaling pathway							cGMP biosynthetic process		visual perception				cGMP-mediated signaling, receptor guanylyl cyclase signaling pathway										integral component of membrane, photoreceptor outer segment membrane, plasma membrane			photoreceptor outer segment membrane	photoreceptor outer segment membrane	photoreceptor outer segment membrane				ATP binding, GTP binding, peptide hormone binding, protein heterodimerization activity, protein homodimerization activity	guanylate cyclase activity, protein kinase activity							ATP binding, GTP binding, guanylate cyclase activity, natriuretic peptide receptor activity, peptide hormone binding, protein heterodimerization activity, protein homodimerization activity, protein kinase activity	natriuretic peptide receptor activity
Cluster of Haloacid dehalogenase-like hydrolase domain-containing protein 2 OS=Rattus norvegicus OX=10116 GN=Hdhd2 PE=1 SV=1 (Q6QI86_RAT)	Q6QI86_RAT [2]	42 kDa
Cluster of Heat shock 27kDa protein 1 OS=Rattus norvegicus OX=10116 GN=Hspb1 PE=1 SV=1 (G3V913_RAT)	G3V913_RAT [2]	23 kDa		negative regulation of apoptotic process, negative regulation of oxidative stress-induced cell death, positive regulation of neuron projection development, regulation of protein phosphorylation		anterograde axonal protein transport, cellular response to butyrate, cellular response to hydrogen peroxide, cellular response to interleukin-11, chaperone-mediated protein folding, positive regulation of neuron projection development	aging, positive regulation of neuron projection development	anterograde axonal protein transport			anterograde axonal protein transport			female pregnancy	female pregnancy, positive regulation of neuron projection development		female pregnancy	female pregnancy	cellular response to butyrate, cellular response to hydrogen peroxide, cellular response to interleukin-11, response to angiotensin, response to ischemia, response to muscle stretch				I band, M band, axon cytoplasm, cardiac myofibril	spindle				I band, M band, cardiac myofibril, nucleus, spindle	plasma membrane, postsynaptic density membrane		nucleus		I band, M band, postsynaptic density membrane, spindle	plasma membrane, postsynaptic density membrane				identical protein binding, protein binding involved in protein folding, protein homodimerization activity, ubiquitin binding								identical protein binding, protein binding involved in protein folding, protein homodimerization activity, ubiquitin binding
Cluster of Heat shock 70 kDa protein 1B OS=Rattus norvegicus OX=10116 GN=Hspa1b PE=2 SV=1 (HS71B_RAT)	HS71B_RAT [2]	70 kDa		mRNA catabolic process, negative regulation of apoptotic process, negative regulation of cell growth, negative regulation of cell proliferation, negative regulation of cysteine-type endopeptidase activity involved in apoptotic process, negative regulation of vasoconstriction, positive regulation of T cell mediated cytotoxicity, positive regulation of microtubule nucleation, positive regulation of…		cellular response to heat, cellular response to unfolded protein, chaperone mediated protein folding requiring cofactor, mRNA catabolic process, protein refolding		vesicle-mediated transport			vesicle-mediated transport		mRNA catabolic process		negative regulation of vasoconstriction				cellular response to heat, cellular response to unfolded protein, defense response				cytosol, mitochondrial matrix, mitochondrion, perinuclear region of cytoplasm	centrosome				COP9 signalosome, centrosome, mitochondrial matrix, mitochondrion, nuclear speck, nucleus	apical plasma membrane, basolateral plasma membrane, membrane raft, plasma membrane	mitochondrial matrix	COP9 signalosome, nuclear speck		COP9 signalosome, centrosome, mitochondrial matrix, nuclear speck	apical plasma membrane, basolateral plasma membrane				ATP binding, NF-kappaB binding, heat shock protein binding, misfolded protein binding, protease binding, protein binding involved in protein folding, ubiquitin protein ligase binding, unfolded protein binding	ATPase activity, ATPase activity, coupled							ATP binding, ATPase activity, ATPase activity, coupled, NF-kappaB binding, heat shock protein binding, misfolded protein binding, protease binding, protein binding involved in protein folding, ubiquitin protein ligase binding, unfolded protein binding
Cluster of Heat shock 70kDa protein 12A (Predicted), isoform CRA_a OS=Rattus norvegicus OX=10116 GN=Hspa12a PE=1 SV=1 (D3ZC55_RAT)	D3ZC55_RAT [2]	75 kDa
Cluster of Heat shock protein HSP 90-alpha OS=Rattus norvegicus OX=10116 GN=Hsp90aa1 PE=1 SV=3 (HS90A_RAT)	HS90A_RAT [3]	85 kDa	virion attachment to host cell	negative regulation of cell cycle arrest, negative regulation of complement-dependent cytotoxicity, negative regulation of neuron apoptotic process, negative regulation of proteasomal protein catabolic process, negative regulation of proteasomal ubiquitin-dependent protein catabolic process, negative regulation of protein metabolic process, negative regulation of transforming growth factor beta a…		axon extension, cardiac muscle cell apoptotic process, cellular response to drug, cellular response to heat, cellular response to interleukin-4, cellular response to organic cyclic compound, central nervous system neuron axonogenesis, chaperone-mediated protein complex assembly, chaperone-mediated protein transport involved in chaperone-mediated autophagy, establishment of cell polarity, neuron m…	axon extension, central nervous system neuron axonogenesis, neuron migration, placenta development	chaperone-mediated protein transport involved in chaperone-mediated autophagy	axon extension		chaperone-mediated protein transport involved in chaperone-mediated autophagy, neuron migration	neuron migration	chaperone-mediated protein transport involved in chaperone-mediated autophagy, telomere maintenance via telomerase	virion attachment to host cell	axon extension, central nervous system neuron axonogenesis, neuron migration, placenta development, skeletal muscle contraction		placenta development	placenta development	cellular response to drug, cellular response to heat, cellular response to interleukin-4, cellular response to organic cyclic compound, response to antibiotic, response to cocaine, response to cold, response to estrogen, response to heat, response to salt stress, response to unfolded protein		virion attachment to host cell		HSP90-CDC37 chaperone complex, cytosol, lysosomal membrane, melanosome, ooplasm, perinuclear region of cytoplasm				extracellular region	COP9 signalosome, lysosomal membrane, melanosome, nucleus	apical plasma membrane, basolateral plasma membrane, brush border membrane, lysosomal membrane, plasma membrane, sperm head plasma membrane, sperm plasma membrane		COP9 signalosome	lysosomal membrane	COP9 signalosome, lysosomal membrane, sperm mitochondrial sheath	apical plasma membrane, basolateral plasma membrane, brush border membrane, sperm head plasma membrane, sperm plasma membrane				ATP binding, ATP-dependent protein binding, CTP binding, DNA polymerase binding, GTP binding, Rho GDP-dissociation inhibitor binding, TPR domain binding, UTP binding, dATP binding, disordered domain specific binding, double-stranded RNA binding, drug binding, heat shock protein binding, histone deacetylase binding, histone methyltransferase binding, ion channel binding, mRNA binding, peptide bind…	ATPase activity					nitric-oxide synthase regulator activity, protein kinase regulator activity		ATP binding, ATP-dependent protein binding, ATPase activity, CTP binding, DNA polymerase binding, GTP binding, Rho GDP-dissociation inhibitor binding, TPR domain binding, UTP binding, dATP binding, disordered domain specific binding, double-stranded RNA binding, drug binding, heat shock protein binding, histone deacetylase binding, histone methyltransferase binding, ion channel binding, mRNA bind…
Cluster of Hemoglobin subunit alpha-1/2 OS=Rattus norvegicus OX=10116 GN=Hba1 PE=1 SV=3 (HBA_RAT)	HBA_RAT [3]	15 kDa		negative regulation of blood pressure, regulation of sensory perception of pain		cellular oxidant detoxification, hydrogen peroxide catabolic process							hydrogen peroxide catabolic process		negative regulation of blood pressure				cellular oxidant detoxification				hemoglobin complex															beta-amyloid binding, heme binding, iron ion binding, organic acid binding, oxygen binding								beta-amyloid binding, heme binding, iron ion binding, organic acid binding, oxygen binding, oxygen transporter activity
Cluster of Heterogeneous nuclear ribonucleoprotein A1 OS=Rattus norvegicus OX=10116 GN=Hnrnpa1 PE=1 SV=3 (ROA1_RAT)	ROA1_RAT [3]	34 kDa		positive regulation of action potential, positive regulation of gene expression, transformation of host cell by virus		RNA metabolic process, RNA splicing, cellular response to epidermal growth factor stimulus, cellular response to potassium ion, cellular response to sodium arsenite, cellular response to thapsigargin, cellular response to tunicamycin, mRNA processing, transformation of host cell by virus	lung development, male gonad development	mRNA transport, nuclear export, nuclear import			mRNA transport, nuclear export, nuclear import		RNA metabolic process, RNA splicing, mRNA processing	transformation of host cell by virus	lung development, male gonad development		male gonad development	male gonad development	cellular response to epidermal growth factor stimulus, cellular response to potassium ion, cellular response to sodium arsenite, cellular response to thapsigargin, cellular response to tunicamycin		transformation of host cell by virus		cytoplasm, cytosol					nucleoplasm, nucleoplasmic periphery of the nuclear pore complex, nucleus, spliceosomal complex			nucleoplasm, nucleoplasmic periphery of the nuclear pore complex, spliceosomal complex		nucleoplasm, nucleoplasmic periphery of the nuclear pore complex, spliceosomal complex					RNA strand annealing activity, annealing helicase activity, mRNA 3'-UTR binding, miRNA binding, sequence-specific mRNA binding, single-stranded DNA binding, single-stranded RNA binding, transcription factor binding	annealing helicase activity							RNA strand annealing activity, annealing helicase activity, mRNA 3'-UTR binding, miRNA binding, sequence-specific mRNA binding, single-stranded DNA binding, single-stranded RNA binding, transcription factor binding
Cluster of Heterogeneous nuclear ribonucleoprotein A3 OS=Rattus norvegicus OX=10116 GN=Hnrnpa3 PE=1 SV=1 (ROA3_RAT)	ROA3_RAT [2]	40 kDa				RNA splicing, mRNA processing		mRNA transport			mRNA transport		RNA splicing, mRNA processing										cytoplasm					catalytic step 2 spliceosome, nucleoplasm, nucleus, ribonucleoprotein granule			catalytic step 2 spliceosome, nucleoplasm, nucleus		catalytic step 2 spliceosome, nucleoplasm					mRNA binding								RNA transmembrane transporter activity, mRNA binding
Cluster of Heterogeneous nuclear ribonucleoprotein K OS=Rattus norvegicus OX=10116 GN=Hnrnpk PE=1 SV=1 (HNRPK_RAT)	HNRPK_RAT [2]	51 kDa		cellular response to glucose stimulus, modulation of synaptic transmission, negative regulation of apoptotic process, negative regulation of branching morphogenesis of a nerve, negative regulation of gene expression, negative regulation of protein binding, negative regulation of transcription from RNA polymerase II promoter, positive regulation of RNA splicing, positive regulation of dendrite ext…		RNA splicing, cellular response to amino acid stimulus, cellular response to forskolin, cellular response to glucose stimulus, cellular response to insulin stimulus, cellular response to rapamycin, mRNA processing, positive regulation of dendrite extension, positive regulation of dendritic spine development	aging, camera-type eye development, central nervous system development, cerebellum development, cerebral cortex development, hippocampus development, kidney development, liver development, lung development, ovarian follicle development, peripheral nervous system development, positive regulation of dendrite extension, positive regulation of dendritic spine development, thymus development			thymus development			RNA splicing, mRNA processing		camera-type eye development, central nervous system development, cerebellum development, cerebral cortex development, hippocampus development, kidney development, liver development, lung development, ovarian follicle development, peripheral nervous system development, positive regulation of dendrite extension, positive regulation of dendritic spine development, thymus development		ovarian follicle development	ovarian follicle development	acute-phase response, cellular response to amino acid stimulus, cellular response to forskolin, cellular response to glucose stimulus, cellular response to insulin stimulus, cellular response to rapamycin, response to activity, response to salt	ovarian follicle development			cell cortex, cytosol, mitochondrion	podosome				mitochondrion, nucleoplasm, nucleus, podosome, spliceosomal complex		mitochondrion	nucleoplasm, spliceosomal complex		nucleoplasm, podosome, spliceosomal complex					ATPase binding, C-rich single-stranded DNA binding, actinin binding, core promoter proximal region sequence-specific DNA binding, double-stranded DNA binding, heat shock protein binding, lamin binding, mRNA 3'-UTR binding, mRNA CDS binding, pre-mRNA 3'-splice site binding, protein domain specific binding, ribonucleoprotein complex binding, single-stranded DNA binding, transcription factor binding								ATPase binding, C-rich single-stranded DNA binding, actinin binding, core promoter proximal region sequence-specific DNA binding, double-stranded DNA binding, heat shock protein binding, lamin binding, mRNA 3'-UTR binding, mRNA CDS binding, pre-mRNA 3'-splice site binding, protein domain specific binding, ribonucleoprotein complex binding, single-stranded DNA binding, transcription factor binding
Cluster of Heterogeneous nuclear ribonucleoprotein L OS=Rattus norvegicus OX=10116 GN=Hnrnpl PE=1 SV=2 (HNRPL_RAT)	HNRPL_RAT [2]	68 kDa		negative regulation of mRNA splicing, via spliceosome, positive regulation of mRNA binding, positive regulation of translation, regulation of alternative mRNA splicing, via spliceosome		cellular response to amino acid starvation, mRNA processing							mRNA processing						cellular response to amino acid starvation, response to peptide	circadian rhythm			cytoplasm, cytosol, perinuclear region of cytoplasm					nucleoplasm, pronucleus, ribonucleoprotein granule			nucleoplasm, pronucleus		nucleoplasm					mRNA 3'-UTR binding, mRNA CDS binding, pre-mRNA intronic binding, transcription regulatory region DNA binding								mRNA 3'-UTR binding, mRNA CDS binding, pre-mRNA intronic binding, transcription regulatory region DNA binding
Cluster of Heterogeneous nuclear ribonucleoprotein M OS=Rattus norvegicus OX=10116 GN=Hnrnpm PE=1 SV=1 (F1M3D3_RAT)	F1M3D3_RAT [3]	78 kDa		positive regulation of protein import, positive regulation of protein localization to nucleus, regulation of mRNA stability involved in response to oxidative stress		alternative mRNA splicing, via spliceosome, cellular response to carcinoembryonic antigen, cellular response to lipopolysaccharide, regulation of mRNA stability involved in response to oxidative stress							alternative mRNA splicing, via spliceosome	cellular response to lipopolysaccharide					cellular response to carcinoembryonic antigen, cellular response to lipopolysaccharide, regulation of mRNA stability involved in response to oxidative stress				cytoplasm					nuclear matrix, nucleus, post-mRNA release spliceosomal complex			nuclear matrix, nucleus, post-mRNA release spliceosomal complex		nuclear matrix, post-mRNA release spliceosomal complex					calcium-dependent protein binding, mRNA binding, protein antigen binding								calcium-dependent protein binding, mRNA binding, protein antigen binding
Cluster of Hexokinase-1 OS=Rattus norvegicus OX=10116 GN=Hk1 PE=1 SV=4 (HXK1_RAT)	HXK1_RAT [2]	102 kDa		cellular glucose homeostasis, negative regulation of apoptotic process, regulation of anion channel activity		carbohydrate phosphorylation, cellular glucose homeostasis, fructose 6-phosphate metabolic process, glucose 6-phosphate metabolic process, glycolytic process, peptidyl-serine phosphorylation, peptidyl-threonine phosphorylation, peptidyl-tyrosine phosphorylation, protein autophosphorylation				innate immune response			carbohydrate phosphorylation, fructose 6-phosphate metabolic process, glucose 6-phosphate metabolic process, glycolytic process, mannose metabolic process, peptidyl-serine phosphorylation, peptidyl-threonine phosphorylation, peptidyl-tyrosine phosphorylation, protein autophosphorylation						inflammatory response, innate immune response, response to brassinosteroid, response to hypoxia, response to ischemia, response to ketamine				cytosol, mitochondrial outer membrane, mitochondrion					mitochondrial outer membrane, mitochondrion	caveola, mitochondrial outer membrane	mitochondrial outer membrane		mitochondrial outer membrane	mitochondrial outer membrane	caveola				ATP binding, glucose binding, macromolecular complex binding, protein homodimerization activity	ATPase activity, fructokinase activity, glucokinase activity, mannokinase activity, protein kinase activity							ATP binding, ATPase activity, fructokinase activity, glucokinase activity, glucose binding, macromolecular complex binding, mannokinase activity, protein homodimerization activity, protein kinase activity
Cluster of Histidine triad nucleotide-binding protein 1 OS=Rattus norvegicus OX=10116 GN=Hint1 PE=1 SV=5 (HINT1_RAT)	HINT1_RAT [2]	14 kDa		intrinsic apoptotic signaling pathway by p53 class mediator, regulation of transcription, DNA-templated		intrinsic apoptotic signaling pathway by p53 class mediator, purine ribonucleotide catabolic process							purine ribonucleotide catabolic process						intrinsic apoptotic signaling pathway by p53 class mediator				cytoplasm					histone deacetylase complex			histone deacetylase complex		histone deacetylase complex					nucleotide binding	hydrolase activity							hydrolase activity, nucleotide binding
Cluster of Histone deacetylase OS=Rattus norvegicus OX=10116 GN=Hdac1l PE=3 SV=3 (D3ZVU7_RAT)	D3ZVU7_RAT [2]	55 kDa		circadian regulation of gene expression, negative regulation of cell proliferation, negative regulation of insulin secretion, negative regulation of neuron apoptotic process, negative regulation of peptidyl-lysine acetylation, negative regulation of transcription, DNA-templated, positive regulation of cell proliferation, positive regulation of chemokine (C-X-C motif) ligand 2 production, positive…		cellular response to oxidative stress, cellular response to tumor necrosis factor, histone H3 deacetylation, histone H4 deacetylation, positive regulation of oligodendrocyte differentiation	positive regulation of oligodendrocyte differentiation						histone H3 deacetylation, histone H4 deacetylation	response to lipopolysaccharide	circadian regulation of gene expression, positive regulation of oligodendrocyte differentiation				cellular response to oxidative stress, cellular response to tumor necrosis factor, response to amphetamine, response to caffeine, response to drug, response to hyperoxia, response to lipopolysaccharide	circadian regulation of gene expression			perinuclear region of cytoplasm					Sin3-type complex, chromatin, histone deacetylase complex, nucleoplasm, nucleus			Sin3-type complex, histone deacetylase complex, nucleoplasm		Sin3-type complex, chromatin, histone deacetylase complex, nucleoplasm					chromatin binding, macromolecular complex binding, transcription factor binding, transcription regulatory region sequence-specific DNA binding	NAD-dependent histone deacetylase activity (H3-K14 specific), deacetylase activity, histone deacetylase activity							NAD-dependent histone deacetylase activity (H3-K14 specific), chromatin binding, deacetylase activity, histone deacetylase activity, macromolecular complex binding, transcription factor binding, transcription regulatory region sequence-specific DNA binding
Cluster of Histone H1.4 OS=Rattus norvegicus OX=10116 GN=Hist1h1e PE=1 SV=3 (H14_RAT)	H14_RAT [4]	22 kDa		negative regulation of DNA recombination, negative regulation of chromatin silencing, negative regulation of transcription from RNA polymerase II promoter, regulation of transcription, DNA-templated		cell differentiation, chromosome condensation, histone H3-K27 trimethylation, histone H3-K4 trimethylation, nucleosome assembly, nucleosome positioning	cell differentiation, multicellular organism development						histone H3-K27 trimethylation, histone H3-K4 trimethylation	spermatogenesis	multicellular organism development, spermatogenesis		spermatogenesis	spermatogenesis										nuclear chromatin, nuclear euchromatin, nuclear heterochromatin, nuclear nucleosome, nucleus			nuclear chromatin, nuclear euchromatin, nuclear heterochromatin, nuclear nucleosome		nuclear chromatin, nuclear euchromatin, nuclear heterochromatin, nuclear nucleosome					ADP binding, AMP binding, ATP binding, GTP binding, calcium ion binding, dATP binding, double-stranded DNA binding, nucleosomal DNA binding, nucleotide binding								ADP binding, AMP binding, ATP binding, GTP binding, calcium ion binding, dATP binding, double-stranded DNA binding, nucleosomal DNA binding, nucleotide binding
Cluster of Histone H2A OS=Rattus norvegicus OX=10116 GN=Hist2h2ac PE=3 SV=2 (D4ACV3_RAT)	D4ACV3_RAT [7]	14 kDa				chromatin organization																						nuclear chromatin, nucleosome			nuclear chromatin		nuclear chromatin, nucleosome					DNA binding, protein heterodimerization activity								DNA binding, protein heterodimerization activity
Cluster of Histone H2B OS=Rattus norvegicus OX=10116 GN=Hist1h2bd PE=3 SV=2 (D3ZWM5_RAT)	D3ZWM5_RAT [4]	14 kDa
Cluster of Histone H3 OS=Rattus norvegicus OX=10116 GN=H3f3c PE=3 SV=1 (D3ZK97_RAT)	D3ZK97_RAT [5]	15 kDa																										nucleoplasm, nucleosome, nucleus			nucleoplasm, nucleus		nucleoplasm, nucleosome					DNA binding, protein heterodimerization activity								DNA binding, protein heterodimerization activity
Cluster of Hypoxanthine-guanine phosphoribosyltransferase OS=Rattus norvegicus OX=10116 GN=Hprt1 PE=1 SV=1 (HPRT_RAT)	HPRT_RAT [2]	24 kDa				GMP catabolic process, GMP salvage, IMP metabolic process, IMP salvage, adenine salvage, cellular response to insulin stimulus, guanine salvage, hypoxanthine metabolic process, hypoxanthine salvage	brain development						GMP catabolic process, GMP salvage, IMP metabolic process, IMP salvage, adenine salvage, guanine salvage, hypoxanthine metabolic process, hypoxanthine salvage	spermatogenesis	brain development, spermatogenesis		spermatogenesis	spermatogenesis	cellular response to insulin stimulus				cytoplasm															magnesium ion binding, nucleotide binding	guanine phosphoribosyltransferase activity, hypoxanthine phosphoribosyltransferase activity							guanine phosphoribosyltransferase activity, hypoxanthine phosphoribosyltransferase activity, magnesium ion binding, nucleotide binding
Cluster of Ilf2 protein OS=Rattus norvegicus OX=10116 GN=Ilf2 PE=1 SV=1 (B2RZC6_RAT)	B2RZC6_RAT [3]	43 kDa
Cluster of Importin subunit alpha OS=Rattus norvegicus OX=10116 GN=Kpna3 PE=1 SV=1 (Q56R18_RAT)	Q56R18_RAT [2]	58 kDa
Cluster of Importin subunit beta-1 OS=Rattus norvegicus OX=10116 GN=Kpnb1 PE=1 SV=1 (F2Z3Q8_RAT)	F2Z3Q8_RAT [2]	97 kDa						protein import into nucleus			protein import into nucleus												cytoplasm					nuclear pore, nucleus			nuclear pore, nucleus		nuclear pore					Ran GTPase binding, kinesin binding, macromolecular complex binding, nuclear localization sequence binding								Ran GTPase binding, kinesin binding, macromolecular complex binding, nuclear import signal receptor activity, nuclear localization sequence binding
Cluster of Inosine-5'-monophosphate dehydrogenase 1 OS=Rattus norvegicus OX=10116 GN=Impdh1 PE=3 SV=1 (IMDH1_RAT)	IMDH1_RAT [2]	55 kDa				GMP biosynthetic process, GTP biosynthetic process	retina development in camera-type eye						GMP biosynthetic process, GTP biosynthetic process		retina development in camera-type eye				response to cold				cytoplasm					nucleus			nucleus							metal ion binding, nucleotide binding	IMP dehydrogenase activity							IMP dehydrogenase activity, metal ion binding, nucleotide binding
Cluster of Interphotoreceptor matrix proteoglycan 1 OS=Rattus norvegicus OX=10116 GN=Impg1 PE=4 SV=1 (F1LQ01_RAT)	F1LQ01_RAT [2]	90 kDa													visual perception												extracellular region						photoreceptor outer segment
Cluster of Keratin, type I cytoskeletal 10 OS=Rattus norvegicus OX=10116 GN=Krt10 PE=1 SV=1 (A0A0G2K2V6_RAT)	A0A0G2K2V6_RAT [17]	57 kDa		Notch signaling pathway, extrinsic apoptotic signaling pathway, negative regulation of apoptotic process, tumor necrosis factor-mediated signaling pathway		Golgi to plasma membrane CFTR protein transport, Notch signaling pathway, cell differentiation involved in embryonic placenta development, epithelial cell differentiation, extrinsic apoptotic signaling pathway, hepatocyte apoptotic process, intermediate filament bundle assembly, intermediate filament cytoskeleton organization, intermediate filament-based process, sarcomere organization, tumor nec…	aging, cell differentiation involved in embryonic placenta development, epithelial cell differentiation, sarcomere organization	Golgi to plasma membrane CFTR protein transport			Golgi to plasma membrane CFTR protein transport				cell differentiation involved in embryonic placenta development, hair cycle		cell differentiation involved in embryonic placenta development	cell differentiation involved in embryonic placenta development	Notch signaling pathway, extrinsic apoptotic signaling pathway, response to estrogen, response to ionizing radiation, response to zinc ion, tumor necrosis factor-mediated signaling pathway				Z disc, centriolar satellite, costamere, cytosol, terminal web	centriolar satellite, intermediate filament, keratin filament, terminal web				Z disc, centriolar satellite, costamere, intermediate filament, keratin filament, nuclear matrix, nucleolus, nucleus, terminal web	apicolateral plasma membrane, dystrophin-associated glycoprotein complex, sarcolemma		nuclear matrix, nucleolus		Z disc, centriolar satellite, costamere, intermediate filament, keratin filament, nuclear matrix, nucleolus, terminal web	apicolateral plasma membrane, dystrophin-associated glycoprotein complex, sarcolemma				keratin filament binding, macromolecular complex binding, scaffold protein binding								keratin filament binding, macromolecular complex binding, scaffold protein binding, structural constituent of cytoskeleton, structural constituent of muscle
Cluster of Kininogen-1 OS=Rattus norvegicus OX=10116 GN=Kng1 PE=1 SV=1 (A0A0G2KA54_RAT)	A0A0G2KA54_RAT [2]	70 kDa		negative regulation of blood coagulation, negative regulation of endopeptidase activity, positive regulation of cytosolic calcium ion concentration, vasodilation		positive regulation of cytosolic calcium ion concentration									vasodilation				acute-phase response								extracellular space																	cysteine-type endopeptidase inhibitor activity		cysteine-type endopeptidase inhibitor activity
Cluster of Lamin-B1 OS=Rattus norvegicus OX=10116 GN=Lmnb1 PE=1 SV=1 (G3V7U4_RAT)	G3V7U4_RAT [2]	67 kDa
Cluster of Leukotriene A(4) hydrolase OS=Rattus norvegicus OX=10116 GN=Lta4h PE=1 SV=1 (Q499P2_RAT)	Q499P2_RAT [2]	69 kDa				Type I pneumocyte differentiation, cellular lipid metabolic process, leukotriene biosynthetic process, leukotriene metabolic process, peptide catabolic process	Type I pneumocyte differentiation						cellular lipid metabolic process, leukotriene biosynthetic process, leukotriene metabolic process, peptide catabolic process		Type I pneumocyte differentiation				response to peptide hormone, response to zinc ion				cytoplasm					nucleus			nucleus							zinc ion binding	aminopeptidase activity, epoxide hydrolase activity, leukotriene-A4 hydrolase activity, metallopeptidase activity							aminopeptidase activity, epoxide hydrolase activity, leukotriene-A4 hydrolase activity, metallopeptidase activity, zinc ion binding
Cluster of L-lactate dehydrogenase A chain OS=Rattus norvegicus OX=10116 GN=Ldha PE=1 SV=1 (LDHA_RAT)	LDHA_RAT [2]	36 kDa		positive regulation of apoptotic process		NAD metabolic process, lactate metabolic process	post-embryonic animal organ development						NAD metabolic process, carbohydrate metabolic process, lactate metabolic process		post-embryonic animal organ development				response to cAMP, response to drug, response to estrogen, response to glucose, response to hydrogen peroxide, response to hypoxia, response to nutrient, response to organic cyclic compound				cytoplasm															NAD binding, identical protein binding, kinase binding	L-lactate dehydrogenase activity							L-lactate dehydrogenase activity, NAD binding, identical protein binding, kinase binding
Cluster of LUC7-like 2 (S. cerevisiae) OS=Rattus norvegicus OX=10116 GN=Luc7l2 PE=1 SV=1 (B2RYP6_RAT)	B2RYP6_RAT [2]	47 kDa
Cluster of Macrophage migration inhibitory factor OS=Rattus norvegicus OX=10116 GN=Mif PE=1 SV=4 (MIF_RAT)	MIF_RAT [3]	12 kDa		brain renin-angiotensin system, positive regulation of acute inflammatory response, positive regulation of axon regeneration, positive regulation of glucose import, positive regulation of glycolytic process, positive regulation of immune response, positive regulation of potassium ion transport, positive regulation of smooth muscle cell migration		cellular response to hydrogen peroxide, cellular response to hypoxia, positive regulation of axon regeneration	aging, brain development, hair follicle development, positive regulation of axon regeneration, skin development			innate immune response				response to lipopolysaccharide, spermatogenesis	brain development, brain renin-angiotensin system, hair follicle development, positive regulation of axon regeneration, skin development, spermatogenesis		spermatogenesis	spermatogenesis	cellular response to hydrogen peroxide, cellular response to hypoxia, inflammatory response, innate immune response, response to drug, response to estradiol, response to glucocorticoid, response to heat, response to inorganic substance, response to insulin, response to lipopolysaccharide, response to mechanical stimulus, response to menaquinone, response to progesterone, response to vitamin E, wo…				cytoplasm				extracellular space	nucleus			nucleus							cytokine activity, macromolecular complex binding	dopachrome isomerase activity, phenylpyruvate tautomerase activity							cytokine activity, dopachrome isomerase activity, macromolecular complex binding, phenylpyruvate tautomerase activity
Cluster of Microtubule-actin cross-linking factor 1 OS=Rattus norvegicus OX=10116 GN=Macf1 PE=1 SV=1 (A0A0G2JWA8_RAT)	A0A0G2JWA8_RAT [2]	831 kDa
Cluster of Microtubule-associated protein 2 OS=Rattus norvegicus OX=10116 GN=Map2 PE=1 SV=3 (MTAP2_RAT)	MTAP2_RAT [2]	202 kDa		negative regulation of axon extension, negative regulation of microtubule binding, negative regulation of microtubule depolymerization, negative regulation of microtubule motor activity, negative regulation of microtubule polymerization, positive regulation of anterograde dense core granule transport, positive regulation of anterograde synaptic vesicle transport, regulation of cellular protein lo…		central nervous system neuron development, microtubule bundle formation, negative regulation of axon extension, neuron projection development	central nervous system neuron development, negative regulation of axon extension, neuron projection development								central nervous system neuron development, negative regulation of axon extension, neuron projection development				response to estradiol, response to progesterone				dendrite cytoplasm, rough endoplasmic reticulum, smooth endoplasmic reticulum	actin cytoskeleton, microtubule, microtubule cytoskeleton	rough endoplasmic reticulum, smooth endoplasmic reticulum			actin cytoskeleton, microtubule, microtubule cytoskeleton, rough endoplasmic reticulum, smooth endoplasmic reticulum	ruffle membrane				microtubule	ruffle membrane				actin binding, calmodulin binding, microtubule binding, protein kinase binding								actin binding, calmodulin binding, microtubule binding, protein kinase binding
Cluster of Microtubule-associated protein 6 OS=Rattus norvegicus OX=10116 GN=Map6 PE=1 SV=1 (MAP6_RAT)	MAP6_RAT [2]	100 kDa		positive regulation of axonogenesis, regulation of microtubule cytoskeleton organization		axonal transport of mitochondrion, dendrite morphogenesis, microtubule cytoskeleton organization, positive regulation of axonogenesis	dendrite morphogenesis, positive regulation of axonogenesis	axonal transport of mitochondrion, cytoskeleton-dependent intracellular transport			axonal transport of mitochondrion, cytoskeleton-dependent intracellular transport, lysosome localization				dendrite morphogenesis, positive regulation of axonogenesis							Golgi-associated vesicle	Golgi apparatus, Golgi-associated vesicle, axon cytoplasm, secretory vesicle, transport vesicle membrane	microtubule				Golgi apparatus, Golgi-associated vesicle, cis-Golgi network, microtubule, secretory vesicle, transport vesicle membrane	transport vesicle membrane			transport vesicle membrane	Golgi-associated vesicle, microtubule, transport vesicle membrane					calmodulin binding, microtubule binding								calmodulin binding, microtubule binding
Cluster of Microtubule-associated protein OS=Rattus norvegicus OX=10116 GN=Mapt PE=1 SV=1 (D4A1Q2_RAT)	D4A1Q2_RAT [2]	72 kDa		intrinsic apoptotic signaling pathway in response to oxidative stress, positive regulation of axon extension, positive regulation of long term synaptic depression, positive regulation of microtubule polymerization, positive regulation of neuron projection development		apoptotic process, intrinsic apoptotic signaling pathway in response to oxidative stress, microtubule cytoskeleton organization, microtubule-based process, neuron differentiation, neuron projection development, positive regulation of axon extension, positive regulation of neuron projection development	brain development, neuron differentiation, neuron projection development, positive regulation of axon extension, positive regulation of neuron projection development	mRNA transport			mRNA transport			female pregnancy	brain development, female pregnancy, memory, neuron projection development, positive regulation of axon extension, positive regulation of neuron projection development		female pregnancy	female pregnancy	intrinsic apoptotic signaling pathway in response to oxidative stress, response to lead ion, response to nutrient, response to organic substance				cytosol	microtubule, microtubule cytoskeleton, tubulin complex				microtubule, microtubule cytoskeleton, tubulin complex	cytoplasmic side of plasma membrane, plasma membrane				microtubule, tubulin complex	cytoplasmic side of plasma membrane, plasma membrane				Hsp90 protein binding, chaperone binding, macromolecular complex binding, microtubule binding, protein kinase binding, protein phosphatase 2A binding								Hsp90 protein binding, chaperone binding, macromolecular complex binding, microtubule binding, protein kinase binding, protein phosphatase 2A binding
Cluster of Microtubule-associated proteins 1A/1B light chain 3B OS=Rattus norvegicus OX=10116 GN=Map1lc3b PE=1 SV=3 (MLP3B_RAT)	MLP3B_RAT [2]	16 kDa		positive regulation of protein binding		autophagosome assembly, autophagosome maturation, cellular response to nitrogen starvation, macroautophagy, mitophagy							autophagosome assembly, autophagosome maturation, macroautophagy, mitophagy						cellular response to nitrogen starvation				autophagosome, autophagosome membrane, cytoplasmic vesicle, cytosol	microtubule, microtubule associated complex				autophagosome, autophagosome membrane, cytoplasmic vesicle, microtubule, microtubule associated complex	autophagosome membrane			autophagosome membrane	autophagosome membrane, microtubule, microtubule associated complex					microtubule binding, protein domain specific binding, tubulin binding, ubiquitin protein ligase binding								microtubule binding, protein domain specific binding, tubulin binding, ubiquitin protein ligase binding
Cluster of Mitogen-activated protein kinase 1 OS=Rattus norvegicus OX=10116 GN=Mapk1 PE=1 SV=3 (MK01_RAT)	MK01_RAT [13]	41 kDa		B cell receptor signaling pathway, ERBB signaling pathway, ERK1 and ERK2 cascade, T cell receptor signaling pathway, calcium-mediated signaling using intracellular calcium source, lipopolysaccharide-mediated signaling pathway, long-term synaptic potentiation, negative regulation of cell differentiation, negative regulation of endothelial cell apoptotic process, negative regulation of neuron apopt…		B cell receptor signaling pathway, Bergmann glial cell differentiation, ERBB signaling pathway, ERK1 and ERK2 cascade, T cell receptor signaling pathway, apoptotic process, calcium-mediated signaling using intracellular calcium source, cardiac myofibril assembly, cardiac neural crest cell development involved in heart development, cell chemotaxis, cell cycle, cell migration involved in coronary a…	Bergmann glial cell differentiation, aging, cardiac myofibril assembly, cardiac neural crest cell development involved in heart development, cell migration involved in coronary angiogenesis, cell migration involved in vasculogenesis, decidualization, embryonic hemopoiesis, endochondral bone growth, endothelial cell differentiation, endothelium development, face development, hematopoietic progenit…	caveolin-mediated endocytosis	endochondral bone growth, lung growth	B cell receptor signaling pathway, T cell receptor signaling pathway, embryonic hemopoiesis, hematopoietic progenitor cell differentiation, thymus development	caveolin-mediated endocytosis, cell chemotaxis, cell migration involved in coronary angiogenesis, cell migration involved in vasculogenesis, metanephric mesenchymal cell migration	cell chemotaxis, cell migration involved in coronary angiogenesis, cell migration involved in vasculogenesis, metanephric mesenchymal cell migration	ERK1 and ERK2 cascade, cytosine metabolic process, diadenosine tetraphosphate biosynthetic process, glycosaminoglycan biosynthetic process, hyaluronan metabolic process, peptidyl-serine phosphorylation, peptidyl-threonine phosphorylation, peptidyl-tyrosine phosphorylation, phosphatidylinositol metabolic process, protein autophosphorylation, protein phosphorylation, stress-activated MAPK cascade	decidualization, lipopolysaccharide-mediated signaling pathway	Bergmann glial cell differentiation, cardiac myofibril assembly, cardiac neural crest cell development involved in heart development, cell migration involved in coronary angiogenesis, cell migration involved in vasculogenesis, decidualization, embryonic hemopoiesis, endochondral bone growth, hematopoietic progenitor cell differentiation, inner ear development, labyrinthine layer blood vessel deve…		decidualization, labyrinthine layer blood vessel development, male gonad development	decidualization, labyrinthine layer blood vessel development, male gonad development	B cell receptor signaling pathway, ERBB signaling pathway, ERK1 and ERK2 cascade, T cell receptor signaling pathway, calcium-mediated signaling using intracellular calcium source, cell chemotaxis, cellular response to DNA damage stimulus, cellular response to amino acid starvation, cellular response to cadmium ion, cellular response to dopamine, cellular response to granulocyte macrophage colony-…			Golgi apparatus	Golgi apparatus, cytoplasmic vesicle, cytosol, dendrite cytoplasm, early endosome, endoplasmic reticulum, late endosome, lysosomal lumen, mitochondrion	microtubule organizing center, mitotic spindle	endoplasmic reticulum	early endosome, late endosome		Golgi apparatus, cytoplasmic vesicle, cytoskeleton, early endosome, endoplasmic reticulum, late endosome, lysosomal lumen, microtubule organizing center, mitochondrion, mitotic spindle, nucleoplasm, nucleus	apical plasma membrane, caveola, integral component of plasma membrane, membrane, plasma membrane	mitochondrion	nucleoplasm		lysosomal lumen, microtubule organizing center, mitotic spindle, nucleoplasm	apical plasma membrane, caveola, integral component of plasma membrane				ATP binding, double-stranded DNA binding, growth factor binding, identical protein binding, mitogen-activated protein kinase kinase kinase binding, phosphatase binding, phosphatidylinositol 3-kinase binding, phosphotyrosine binding, platelet-derived growth factor binding, platelet-derived growth factor receptor binding, protein kinase binding, transcription factor binding, vascular endothelial gr…	MAP kinase activity, MAP kinase kinase activity, RNA polymerase II carboxy-terminal domain kinase activity, platelet-derived growth factor beta-receptor activity, protein serine/threonine kinase activity, protein tyrosine kinase activity, vascular endothelial growth factor-activated receptor activity							ATP binding, MAP kinase activity, MAP kinase kinase activity, RNA polymerase II carboxy-terminal domain kinase activity, double-stranded DNA binding, growth factor binding, identical protein binding, mitogen-activated protein kinase kinase kinase binding, phosphatase binding, phosphatidylinositol 3-kinase binding, phosphotyrosine binding, platelet-derived growth factor beta-receptor activity, pla…	platelet-derived growth factor beta-receptor activity, vascular endothelial growth factor-activated receptor activity
Cluster of Murinoglobulin-1 OS=Rattus norvegicus OX=10116 GN=LOC297568 PE=1 SV=1 (A0A0G2K926_RAT)	A0A0G2K926_RAT [6]	164 kDa																	acute-phase response, inflammatory response								extracellular space											protease binding						serine-type endopeptidase inhibitor activity		protease binding, serine-type endopeptidase inhibitor activity
Cluster of Myc box-dependent-interacting protein 1 OS=Rattus norvegicus OX=10116 GN=Bin1 PE=1 SV=1 (BIN1_RAT)	BIN1_RAT [4]	65 kDa		positive regulation of GTPase activity, positive regulation of apoptotic process, positive regulation of astrocyte differentiation, positive regulation of endocytosis, regulation of cell cycle arrest, regulation of neuron differentiation		cell chemotaxis, lipid tube assembly, phagocytosis, engulfment, plasma membrane tubulation, podosome assembly, positive regulation of astrocyte differentiation, regulation of neuron differentiation	positive regulation of astrocyte differentiation, regulation of neuron differentiation	phagocytosis, engulfment, synaptic vesicle endocytosis			cell chemotaxis, phagocytosis, engulfment, synaptic vesicle endocytosis	cell chemotaxis			positive regulation of astrocyte differentiation, regulation of neuron differentiation				cell chemotaxis				I band, Z disc, cell cortex, endosome, extrinsic component of synaptic vesicle membrane, synaptic vesicle	microtubule, podosome		endosome		I band, Z disc, cytoskeleton, endosome, extrinsic component of synaptic vesicle membrane, microtubule, nucleus, podosome, synaptic vesicle	T-tubule, extrinsic component of synaptic vesicle membrane, phagocytic cup, plasma membrane		nucleus	extrinsic component of synaptic vesicle membrane	I band, Z disc, extrinsic component of synaptic vesicle membrane, microtubule, podosome	T-tubule, phagocytic cup				GTPase binding, macromolecular complex binding, phospholipid binding, protein C-terminus binding, protein heterodimerization activity, tau protein binding								GTPase binding, macromolecular complex binding, phospholipid binding, protein C-terminus binding, protein heterodimerization activity, tau protein binding
Cluster of Myl6 protein OS=Rattus norvegicus OX=10116 GN=Myl6 PE=2 SV=1 (B2GV99_RAT)	B2GV99_RAT [3]	17 kDa				muscle filament sliding	skeletal muscle tissue development								muscle contraction, muscle filament sliding, skeletal muscle tissue development									unconventional myosin complex				unconventional myosin complex					unconventional myosin complex					calcium ion binding	actin-dependent ATPase activity, motor activity							actin-dependent ATPase activity, calcium ion binding, motor activity, structural constituent of muscle		motor activity
Cluster of Myosin regulatory light chain 12B OS=Rattus norvegicus OX=10116 GN=Myl12b PE=4 SV=1 (A0A0G2JSW0_RAT)	A0A0G2JSW0_RAT [2]	20 kDa
Cluster of Myosin-6 OS=Rattus norvegicus OX=10116 GN=Myh6 PE=1 SV=2 (G3V885_RAT)	G3V885_RAT [9]	223 kDa
Cluster of Myosin-9 OS=Rattus norvegicus OX=10116 GN=Myh9 PE=1 SV=3 (MYH9_RAT)	MYH9_RAT [3]	226 kDa	cell-cell adhesion	follicle-stimulating hormone signaling pathway, negative regulation of vascular associated smooth muscle cell migration, positive regulation of ERK1 and ERK2 cascade, positive regulation of G-protein coupled receptor protein signaling pathway, positive regulation of cytosolic calcium ion concentration involved in phospholipase C-activating G-protein coupled signaling pathway, positive regulation …		actin cytoskeleton reorganization, actin filament bundle assembly, actin filament bundle distribution, actin filament-based movement, blood vessel endothelial cell migration, cellular response to mechanical stimulus, cellular response to platelet-derived growth factor stimulus, cytokinetic process, follicle-stimulating hormone signaling pathway, monocyte differentiation, platelet formation, posit…	angiogenesis, follicle-stimulating hormone signaling pathway, monocyte differentiation, platelet formation	protein transport		monocyte differentiation, platelet formation	blood vessel endothelial cell migration, protein transport	blood vessel endothelial cell migration	membrane protein ectodomain proteolysis		angiogenesis, blood vessel endothelial cell migration, follicle-stimulating hormone signaling pathway, monocyte differentiation, platelet formation		follicle-stimulating hormone signaling pathway	follicle-stimulating hormone signaling pathway	cellular response to mechanical stimulus, cellular response to platelet-derived growth factor stimulus, follicle-stimulating hormone signaling pathway, positive regulation of cytosolic calcium ion concentration involved in phospholipase C-activating G-protein coupled signaling pathway	follicle-stimulating hormone signaling pathway			actomyosin contractile ring, cytosol, mitochondrion	actin cytoskeleton, actin filament, actomyosin contractile ring, myosin complex, stress fiber				actin cytoskeleton, actin filament, actomyosin contractile ring, mitochondrion, myosin complex, nucleus, stress fiber	apical plasma membrane, lateral plasma membrane, plasma membrane	mitochondrion	nucleus		actin filament, actomyosin contractile ring, myosin complex, stress fiber	apical plasma membrane, lateral plasma membrane, plasma membrane				ATP binding, G-protein alpha-subunit binding, actin filament binding, calmodulin binding, follicle-stimulating hormone receptor binding, integrin binding, protein anchor, protein homodimerization activity, protein kinase binding, scaffold protein binding	ATPase activity, microfilament motor activity, sodium:potassium-exchanging ATPase activity							ATP binding, ATPase activity, G-protein alpha-subunit binding, actin filament binding, calmodulin binding, follicle-stimulating hormone receptor binding, integrin binding, microfilament motor activity, protein anchor, protein homodimerization activity, protein kinase binding, scaffold protein binding, sodium:potassium-exchanging ATPase activity		microfilament motor activity
Cluster of Myristoylated alanine-rich C-kinase substrate OS=Rattus norvegicus OX=10116 GN=Marcks PE=1 SV=2 (MARCS_RAT)	MARCS_RAT [2]	30 kDa	cell-substrate adhesion	activation of phospholipase D activity, positive regulation of dendritic spine morphogenesis, positive regulation of insulin receptor signaling pathway, positive regulation of neuron projection development, positive regulation of protein kinase C activity, regulation of modification of postsynaptic actin cytoskeleton		actin filament organization, positive regulation of dendritic spine morphogenesis, positive regulation of neuron projection development	brain development, positive regulation of dendritic spine morphogenesis, positive regulation of neuron projection development, ventricular cardiac muscle tissue development	intracellular protein transport			intracellular protein transport				brain development, positive regulation of dendritic spine morphogenesis, positive regulation of neuron projection development, ventricular cardiac muscle tissue development								chromatoid body, cytoplasm, lysosome, presynaptic cytosol	outer dense fiber, postsynaptic cytoskeleton				chromatoid body, lysosome, outer dense fiber, postsynaptic cytoskeleton	anchored component of postsynaptic membrane, anchored component of presynaptic membrane, plasma membrane				outer dense fiber	anchored component of postsynaptic membrane, anchored component of presynaptic membrane				actin binding, calmodulin binding, phosphatidylserine binding, phospholipid binding								actin binding, calmodulin binding, phosphatidylserine binding, phospholipid binding
Cluster of NADH dehydrogenase [ubiquinone] 1 alpha subcomplex subunit 8 OS=Rattus norvegicus OX=10116 GN=Ndufa8 PE=1 SV=1 (A0A0G2JVL6_RAT)	A0A0G2JVL6_RAT [2]	20 kDa
Cluster of Neural cell adhesion molecule 1 OS=Rattus norvegicus OX=10116 GN=Ncam1 PE=1 SV=1 (A0A0G2K0M8_RAT)	A0A0G2K0M8_RAT [3]	109 kDa	calcium-independent cell-cell adhesion via plasma membrane cell-adhesion molecules, cell adhesion	modulation of synaptic transmission, negative regulation of cell death, positive regulation of cardiac muscle cell proliferation, regulation of sensory perception of pain		axonal fasciculation, cellular response to inorganic substance, cellular response to molecule of bacterial origin, neuron development, peripheral nervous system axon regeneration	aging, animal organ regeneration, axonal fasciculation, peripheral nervous system axon regeneration, thalamus development							cellular response to molecule of bacterial origin	animal organ regeneration, axonal fasciculation, learning or memory, multicellular organismal response to stress, peripheral nervous system axon regeneration, thalamus development				cellular response to inorganic substance, cellular response to molecule of bacterial origin, multicellular organismal response to stress, peripheral nervous system axon regeneration, response to activity, response to cocaine, response to drug, response to inorganic substance, response to lead ion										integral component of postsynaptic membrane, integral component of presynaptic membrane, plasma membrane					integral component of postsynaptic membrane, integral component of presynaptic membrane, plasma membrane				LRR domain binding, cytoskeletal protein binding, fibroblast growth factor receptor binding, heparin binding, phosphatase binding								LRR domain binding, cytoskeletal protein binding, fibroblast growth factor receptor binding, heparin binding, phosphatase binding
Cluster of Neuronal cell adhesion molecule OS=Rattus norvegicus OX=10116 GN=Nrcam PE=1 SV=1 (A0A0G2K3Q5_RAT)	A0A0G2K3Q5_RAT [4]	144 kDa	homophilic cell adhesion via plasma membrane adhesion molecules			axon guidance, clustering of voltage-gated sodium channels, dendrite self-avoidance	axon guidance, clustering of voltage-gated sodium channels, dendrite self-avoidance					axon guidance			axon guidance, clustering of voltage-gated sodium channels, dendrite self-avoidance				axon guidance								extracellular region		integral component of membrane, plasma membrane					plasma membrane				ankyrin binding, protein binding involved in cell-cell adhesion								ankyrin binding, protein binding involved in cell-cell adhesion
Cluster of NHP2-like protein 1 OS=Rattus norvegicus OX=10116 GN=Snu13 PE=2 SV=4 (NH2L1_RAT)	NH2L1_RAT [2]	14 kDa				box C/D snoRNP assembly, mRNA splicing, via spliceosome, maturation of LSU-rRNA							mRNA splicing, via spliceosome, maturation of LSU-rRNA	single fertilization			single fertilization	single fertilization										U2-type precatalytic spliceosome, U4/U6 x U5 tri-snRNP complex, U4atac snRNP, box C/D snoRNP complex, nucleus			U2-type precatalytic spliceosome, U4/U6 x U5 tri-snRNP complex, U4atac snRNP, box C/D snoRNP complex		U2-type precatalytic spliceosome, U4/U6 x U5 tri-snRNP complex, U4atac snRNP, box C/D snoRNP complex					U4atac snRNA binding, box C/D snoRNA binding								U4atac snRNA binding, box C/D snoRNA binding
Cluster of Non-specific lipid-transfer protein OS=Rattus norvegicus OX=10116 GN=Scp2 PE=1 SV=3 (F1LQ55_RAT)	F1LQ55_RAT [2]	59 kDa
Cluster of NSF attachment protein gamma OS=Rattus norvegicus OX=10116 GN=Napg PE=1 SV=1 (A0A0G2K350_RAT)	A0A0G2K350_RAT [2]	35 kDa
Cluster of Nucleophosmin OS=Rattus norvegicus OX=10116 GN=Npm1 PE=1 SV=1 (NPM_RAT)	NPM_RAT [3]	33 kDa		negative regulation of apoptotic process, negative regulation of cardiac muscle cell apoptotic process, negative regulation of epithelial cell proliferation, negative regulation of neuron apoptotic process, negative regulation of protein kinase activity by regulation of protein phosphorylation, positive regulation of DNA metabolic process, positive regulation of DNA replication, positive regulati…		DNA repair, cell aging, cellular response to hypoxia, cellular response to testosterone stimulus, centrosome cycle, chromatin remodeling, cleavage in ITS2 between 5.8S rRNA and LSU-rRNA of tricistronic rRNA transcript (SSU-rRNA, 5.8S rRNA, LSU-rRNA), protein homooligomerization, rRNA transcription, regulation of eIF2 alpha phosphorylation by dsRNA	cell aging, liver regeneration	rRNA export from nucleus, ribosomal large subunit export from nucleus, ribosomal small subunit export from nucleus			rRNA export from nucleus, ribosomal large subunit export from nucleus, ribosomal small subunit export from nucleus		DNA repair, cleavage in ITS2 between 5.8S rRNA and LSU-rRNA of tricistronic rRNA transcript (SSU-rRNA, 5.8S rRNA, LSU-rRNA), rRNA transcription		cardiac muscle hypertrophy, liver regeneration				DNA repair, cellular response to hypoxia, cellular response to testosterone stimulus, regulation of eIF2 alpha phosphorylation by dsRNA				cytoplasm	centrosome				centrosome, nuclear matrix, nucleolus, nucleoplasm, nucleus			nuclear matrix, nucleolus, nucleoplasm		centrosome, nuclear matrix, nucleolus, nucleoplasm					ATP binding, DNA binding, NF-kappaB binding, RNA binding, chromatin binding, histone binding, p53 binding, phosphatidylinositol-3,4,5-trisphosphate binding, protein kinase B binding, unfolded protein binding						protein kinase inhibitor activity		ATP binding, DNA binding, NF-kappaB binding, RNA binding, chromatin binding, histone binding, p53 binding, phosphatidylinositol-3,4,5-trisphosphate binding, protein kinase B binding, protein kinase inhibitor activity, unfolded protein binding
Cluster of Nucleoside diphosphate kinase B OS=Rattus norvegicus OX=10116 GN=Nme2 PE=1 SV=1 (NDKB_RAT)	NDKB_RAT [2]	17 kDa		adenylate cyclase-activating G-protein coupled receptor signaling pathway, cellular response to glucose stimulus, integrin-mediated signaling pathway, lactation, negative regulation of apoptotic process, negative regulation of gene expression, negative regulation of myeloid leukocyte differentiation, positive regulation of DNA binding, positive regulation of epithelial cell proliferation, positiv…		CTP biosynthetic process, GTP biosynthetic process, UTP biosynthetic process, adenylate cyclase-activating G-protein coupled receptor signaling pathway, cellular response to drug, cellular response to fatty acid, cellular response to glucose stimulus, cellular response to oxidative stress, integrin-mediated signaling pathway, nucleoside diphosphate phosphorylation, positive regulation of neuron p…	hippocampus development, lactation, positive regulation of neuron projection development	endocytosis, lactation			endocytosis, lactation		CTP biosynthetic process, GTP biosynthetic process, UTP biosynthetic process, nucleoside diphosphate phosphorylation, protein autophosphorylation, purine nucleotide metabolic process, pyrimidine nucleotide metabolic process		hippocampus development, lactation, positive regulation of neuron projection development				adenylate cyclase-activating G-protein coupled receptor signaling pathway, cellular response to drug, cellular response to fatty acid, cellular response to glucose stimulus, cellular response to oxidative stress, integrin-mediated signaling pathway, response to amine, response to cAMP, response to growth hormone, response to testosterone				cytosol, mitochondrial outer membrane, perinuclear region of cytoplasm	centrosome				centrosome, mitochondrial outer membrane, nucleus	membrane, mitochondrial outer membrane, ruffle membrane	mitochondrial outer membrane	nucleus	mitochondrial outer membrane	centrosome, mitochondrial outer membrane	ruffle membrane				ATP binding, DNA binding, G-quadruplex DNA binding, GDP binding, GTP binding, RNA polymerase II regulatory region sequence-specific DNA binding, drug binding, enzyme binding, fatty acid binding, gamma-tubulin binding, identical protein binding, intermediate filament binding, magnesium ion binding, metal ion binding, ribosomal small subunit binding, single-stranded DNA binding	deoxyribonuclease activity, nucleoside diphosphate kinase activity, protein histidine kinase activity, protein serine/threonine kinase activity							ATP binding, DNA binding, G-quadruplex DNA binding, GDP binding, GTP binding, RNA polymerase II regulatory region sequence-specific DNA binding, deoxyribonuclease activity, drug binding, enzyme binding, fatty acid binding, gamma-tubulin binding, identical protein binding, intermediate filament binding, magnesium ion binding, metal ion binding, nucleoside diphosphate kinase activity, protein histi…
Cluster of Optineurin OS=Rattus norvegicus OX=10116 GN=Optn PE=1 SV=1 (G8JLS4_RAT)	G8JLS4_RAT [3]	66 kDa
Cluster of Oxidation resistance protein 1 OS=Rattus norvegicus OX=10116 GN=Oxr1 PE=1 SV=1 (A0A0G2K7Y2_RAT)	A0A0G2K7Y2_RAT [4]	97 kDa
Cluster of Peptidyl-prolyl cis-trans isomerase A OS=Rattus norvegicus OX=10116 GN=Ppia PE=1 SV=2 (PPIA_RAT)	PPIA_RAT [2]	18 kDa		negative regulation of phosphoprotein phosphatase activity, regulation of viral genome replication		protein peptidyl-prolyl isomerization, protein refolding							protein peptidyl-prolyl isomerization										cytosol				extracellular region	nucleus			nucleus							cyclosporin A binding, unfolded protein binding	peptidyl-prolyl cis-trans isomerase activity							cyclosporin A binding, peptidyl-prolyl cis-trans isomerase activity, unfolded protein binding
Cluster of Peptidylprolyl isomerase D-like 1 OS=Rattus norvegicus OX=10116 GN=Ppidl1 PE=4 SV=2 (M0RB67_RAT)	M0RB67_RAT [2]	45 kDa		negative regulation of apoptotic process, negative regulation of transcription from RNA polymerase II promoter, positive regulation of apoptotic process, regulation of mitochondrial membrane potential		apoptotic process, cellular response to UV-A, chaperone-mediated protein folding, lipid particle organization, macromolecular complex assembly, protein peptidyl-prolyl isomerization, protein refolding		protein transport			protein transport		protein peptidyl-prolyl isomerization						cellular response to UV-A, response to oxidative stress				mitochondrion					mitochondrion, nucleolus, nucleoplasm, nucleus		mitochondrion	nucleolus, nucleoplasm		nucleolus, nucleoplasm					Hsp70 protein binding, Hsp90 protein binding, cyclosporin A binding, enzyme binding, estrogen receptor binding, transcription factor binding, unfolded protein binding	peptidyl-prolyl cis-trans isomerase activity							Hsp70 protein binding, Hsp90 protein binding, cyclosporin A binding, enzyme binding, estrogen receptor binding, peptidyl-prolyl cis-trans isomerase activity, transcription factor binding, unfolded protein binding
Cluster of Peroxiredoxin-5, mitochondrial OS=Rattus norvegicus OX=10116 GN=Prdx5 PE=1 SV=1 (PRDX5_RAT)	PRDX5_RAT [2]	22 kDa		cell redox homeostasis		cell redox homeostasis, cellular response to oxidative stress, hydrogen peroxide catabolic process							hydrogen peroxide catabolic process						cellular response to oxidative stress				mitochondrion, peroxisomal matrix, peroxisome					mitochondrion, peroxisomal matrix, peroxisome		mitochondrion			peroxisomal matrix			thioredoxin peroxidase activity			thioredoxin peroxidase activity							thioredoxin peroxidase activity
Cluster of Phosphoglucomutase-1 OS=Rattus norvegicus OX=10116 GN=Pgm1 PE=1 SV=2 (Q499Q4_RAT)	Q499Q4_RAT [2]	61 kDa		cellular calcium ion homeostasis		cellular calcium ion homeostasis, cellular response to magnetism, glycogen biosynthetic process							carbohydrate metabolic process, galactose catabolic process, glucose metabolic process, glycogen biosynthetic process						cellular response to magnetism				Z disc, cytosol					Z disc					Z disc					magnesium ion binding	phosphoglucomutase activity							magnesium ion binding, phosphoglucomutase activity
Cluster of Phosphoglycerate kinase 1 OS=Rattus norvegicus OX=10116 GN=Pgk1 PE=1 SV=2 (PGK1_RAT)	PGK1_RAT [4]	45 kDa		positive regulation of oxidative phosphorylation		glycolytic process, phosphorylation							carbohydrate metabolic process, gluconeogenesis, glycolytic process, phosphorylation										cytosol															ADP binding, ATP binding	phosphoglycerate kinase activity							ADP binding, ATP binding, phosphoglycerate kinase activity
Cluster of Phosphoglycerate mutase 1 OS=Rattus norvegicus OX=10116 GN=Pgam1 PE=1 SV=4 (PGAM1_RAT)	PGAM1_RAT [3]	29 kDa		regulation of glycolytic process, regulation of pentose-phosphate shunt		glycolytic process							glycolytic process, respiratory burst										cytosol					nucleus			nucleus							protein kinase binding	bisphosphoglycerate mutase activity, hydrolase activity, phosphoglycerate mutase activity							bisphosphoglycerate mutase activity, hydrolase activity, phosphoglycerate mutase activity, protein kinase binding
Cluster of Phosphoribosylformylglycinamidine synthase OS=Rattus norvegicus OX=10116 GN=Pfas PE=1 SV=1 (A0A0G2JTN4_RAT)	A0A0G2JTN4_RAT [2]	144 kDa
Cluster of Plasma membrane calcium-transporting ATPase 1 OS=Rattus norvegicus OX=10116 GN=Atp2b1 PE=1 SV=3 (AT2B1_RAT)	AT2B1_RAT [5]	135 kDa		negative regulation of arginine catabolic process, negative regulation of calcineurin-NFAT signaling cascade, negative regulation of cardiac muscle hypertrophy in response to stress, negative regulation of citrulline biosynthetic process, negative regulation of cytokine production, negative regulation of cytosolic calcium ion concentration, negative regulation of nitric oxide biosynthetic process…		cellular response to acetylcholine, cellular response to corticosterone stimulus, cellular response to epinephrine stimulus, cellular response to vitamin D, flagellated sperm motility, negative regulation of cytosolic calcium ion concentration	aging, brain development, hippocampus development, neural retina development	calcium ion export from cell, calcium ion transmembrane transport			calcium ion export from cell, calcium ion transmembrane transport, flagellated sperm motility	flagellated sperm motility		spermatogenesis	hippocampus development, neural retina development, regulation of blood pressure, regulation of vascular smooth muscle contraction, spermatogenesis, urinary bladder smooth muscle contraction		spermatogenesis	spermatogenesis	cellular response to acetylcholine, cellular response to corticosterone stimulus, cellular response to epinephrine stimulus, cellular response to vitamin D, response to cold, response to hydrostatic pressure				Z disc					Z disc, nucleus	T-tubule, apical plasma membrane, basolateral plasma membrane, cytoplasmic side of plasma membrane, dendrite membrane, dendritic spine membrane, immunological synapse, integral component of presynaptic active zone membrane, integral component of presynaptic membrane, membrane raft, neuronal cell body membrane		nucleus		Z disc, sperm principal piece	T-tubule, apical plasma membrane, basolateral plasma membrane, cytoplasmic side of plasma membrane, dendrite membrane, dendritic spine membrane, immunological synapse, integral component of presynaptic active zone membrane, integral component of presynaptic membrane, neuronal cell body membrane				ATP binding, PDZ domain binding, calmodulin binding, metal ion binding, nitric-oxide synthase binding, protein kinase binding, protein phosphatase 2B binding	ATPase activity, calcium-transporting ATPase activity involved in regulation of presynaptic cytosolic calcium ion concentration					nitric-oxide synthase inhibitor activity		ATP binding, ATPase activity, PDZ domain binding, calcium-transporting ATPase activity involved in regulation of presynaptic cytosolic calcium ion concentration, calmodulin binding, metal ion binding, nitric-oxide synthase binding, nitric-oxide synthase inhibitor activity, protein kinase binding, protein phosphatase 2B binding
Cluster of Poly(rC)-binding protein 3 OS=Rattus norvegicus OX=10116 GN=Pcbp3 PE=1 SV=1 (Q6AY48_RAT)	Q6AY48_RAT [3]	34 kDa
Cluster of Polyadenylate-binding protein 1 OS=Rattus norvegicus OX=10116 GN=Pabpc1 PE=1 SV=1 (A0A0G2JZS2_RAT)	A0A0G2JZS2_RAT [7]	60 kDa
Cluster of Ppm1b protein OS=Rattus norvegicus OX=10116 GN=Ppm1b PE=1 SV=1 (Q99ND8_RAT)	Q99ND8_RAT [2]	51 kDa
Cluster of Programmed cell death 5 OS=Rattus norvegicus OX=10116 GN=Pdcd5 PE=1 SV=1 (D4ADF5_RAT)	D4ADF5_RAT [2]	14 kDa
Cluster of Prosaposin OS=Rattus norvegicus OX=10116 GN=Psap PE=1 SV=1 (SAP_RAT)	SAP_RAT [2]	61 kDa		adenylate cyclase-inhibiting G-protein coupled receptor signaling pathway, regulation of lipid metabolic process		adenylate cyclase-inhibiting G-protein coupled receptor signaling pathway, epithelial cell differentiation involved in prostate gland development, sphingolipid metabolic process	epithelial cell differentiation involved in prostate gland development, prostate gland growth	glycolipid transport	prostate gland growth		glycolipid transport		sphingolipid metabolic process		epithelial cell differentiation involved in prostate gland development, prostate gland growth		epithelial cell differentiation involved in prostate gland development, prostate gland growth	epithelial cell differentiation involved in prostate gland development, prostate gland growth	adenylate cyclase-inhibiting G-protein coupled receptor signaling pathway				lysosome				extracellular space	lysosome
Cluster of Proteasome subunit alpha type OS=Rattus norvegicus OX=10116 GN=Psma7 PE=1 SV=1 (A0A0G2K0W9_RAT)	A0A0G2K0W9_RAT [2]	28 kDa				proteasomal protein catabolic process, proteasomal ubiquitin-independent protein catabolic process, proteasome-mediated ubiquitin-dependent protein catabolic process							proteasomal protein catabolic process, proteasomal ubiquitin-independent protein catabolic process, proteasome-mediated ubiquitin-dependent protein catabolic process										cytoplasm					nucleus			nucleus								threonine-type endopeptidase activity							threonine-type endopeptidase activity
Cluster of Protein FAM107B OS=Rattus norvegicus OX=10116 GN=Fam107b PE=2 SV=1 (F107B_RAT)	F107B_RAT [2]	16 kDa
Cluster of Protein kinase C and casein kinase substrate in neurons 2 protein OS=Rattus norvegicus OX=10116 GN=Pacsin2 PE=1 SV=2 (PACN2_RAT)	PACN2_RAT [2]	56 kDa		modulation of synaptic transmission, negative regulation of endocytosis		actin cytoskeleton organization, caveola assembly, cell projection morphogenesis, cytoskeleton organization, plasma membrane tubulation	cell projection morphogenesis	caveolin-mediated endocytosis			caveolin-mediated endocytosis, protein localization to endosome												cytoplasm, cytoplasmic vesicle membrane, cytosol, early endosome, recycling endosome membrane	cytoskeleton		early endosome, recycling endosome membrane		cytoplasmic vesicle membrane, cytoskeleton, early endosome, nuclear speck, recycling endosome membrane	caveola, cytoplasmic vesicle membrane, extrinsic component of membrane, plasma membrane, recycling endosome membrane, ruffle membrane		nuclear speck	cytoplasmic vesicle membrane, recycling endosome membrane	cytoplasmic vesicle membrane, nuclear speck, recycling endosome membrane	caveola, plasma membrane, ruffle membrane				cytoskeletal protein binding, identical protein binding, phosphatidic acid binding, phospholipid binding								cytoskeletal protein binding, identical protein binding, phosphatidic acid binding, phospholipid binding
Cluster of Protein kinase C and casein kinase substrate in neurons protein 1 OS=Rattus norvegicus OX=10116 GN=Pacsin1 PE=1 SV=1 (PACN1_RAT)	PACN1_RAT [2]	50 kDa		positive regulation of dendrite development		actin filament organization, cytoskeleton organization, neuron projection morphogenesis, plasma membrane tubulation, positive regulation of dendrite development, protein localization to plasma membrane	neuron projection morphogenesis, positive regulation of dendrite development	synaptic vesicle endocytosis			protein localization to plasma membrane, synaptic vesicle endocytosis				neuron projection morphogenesis, positive regulation of dendrite development								cytoplasm, cytoplasmic vesicle membrane, cytosol, perinuclear region of cytoplasm	cytoskeleton				cytoplasmic vesicle membrane, cytoskeleton	cytoplasmic vesicle membrane, plasma membrane, postsynaptic density membrane, ruffle membrane			cytoplasmic vesicle membrane	cytoplasmic vesicle membrane, postsynaptic density membrane	plasma membrane, postsynaptic density membrane, ruffle membrane				cytoskeletal protein binding, phospholipid binding								cytoskeletal protein binding, phospholipid binding
Cluster of Protein lin-7 homolog C OS=Rattus norvegicus OX=10116 GN=Lin7c PE=1 SV=1 (LIN7C_RAT)	LIN7C_RAT [4]	22 kDa		neurotransmitter secretion		cell-cell junction assembly, exocytosis, maintenance of epithelial cell apical/basal polarity, neurotransmitter secretion	morphogenesis of an epithelial sheet	exocytosis, neurotransmitter secretion, protein transport			exocytosis, neurotransmitter secretion, protein localization to basolateral plasma membrane, protein transport												cytoplasm						MPP7-DLG1-LIN7 complex, basolateral plasma membrane, plasma membrane, postsynaptic membrane					MPP7-DLG1-LIN7 complex, basolateral plasma membrane, plasma membrane, postsynaptic membrane				L27 domain binding, PDZ domain binding, cytoskeletal protein binding								L27 domain binding, PDZ domain binding, cytoskeletal protein binding
Cluster of Protein NDRG1 OS=Rattus norvegicus OX=10116 GN=Ndrg1 PE=1 SV=1 (NDRG1_RAT)	NDRG1_RAT [2]	43 kDa		DNA damage response, signal transduction by p53 class mediator, negative regulation of cell proliferation, signal transduction		DNA damage response, signal transduction by p53 class mediator, cellular response to hypoxia, mast cell activation, peripheral nervous system myelin maintenance, signal transduction	peripheral nervous system myelin maintenance			mast cell activation					peripheral nervous system myelin maintenance				DNA damage response, signal transduction by p53 class mediator, cellular response to hypoxia, signal transduction				cytosol, perinuclear region of cytoplasm, recycling endosome membrane	centrosome, microtubule		recycling endosome membrane		centrosome, microtubule, nucleus, recycling endosome membrane	plasma membrane, recycling endosome membrane		nucleus	recycling endosome membrane	centrosome, microtubule, recycling endosome membrane	plasma membrane				Rab GTPase binding, cadherin binding, gamma-tubulin binding, microtubule binding								Rab GTPase binding, cadherin binding, gamma-tubulin binding, microtubule binding
Cluster of Protein phosphatase 2 (Formerly 2A), regulatory subunit A (PR 65), alpha isoform, isoform CRA_a OS=Rattus norvegicus OX=10116 GN=Ppp2r1a PE=1 SV=1 (Q5XI34_RAT)	Q5XI34_RAT [2]	65 kDa		positive regulation of extrinsic apoptotic signaling pathway in absence of ligand		apoptotic process involved in morphogenesis, protein dephosphorylation	apoptotic process involved in morphogenesis						protein dephosphorylation										cytoplasm						membrane raft															protein phosphatase regulator activity		protein phosphatase regulator activity
Cluster of Protein RUFY3 OS=Rattus norvegicus OX=10116 GN=Rufy3 PE=1 SV=1 (RUFY3_RAT)	RUFY3_RAT [4]	53 kDa		negative regulation of axonogenesis, positive regulation of axon extension, positive regulation of cell migration, positive regulation of intracellular protein transport, regulation of axonogenesis, regulation of establishment of cell polarity		actin filament organization, negative regulation of axonogenesis, positive regulation of axon extension, regulation of axonogenesis	negative regulation of axonogenesis, positive regulation of axon extension, regulation of axonogenesis								negative regulation of axonogenesis, positive regulation of axon extension, regulation of axonogenesis								cytoplasm						membrane
Cluster of Protein SET OS=Rattus norvegicus OX=10116 GN=Pkn3 PE=1 SV=3 (D3ZC07_RAT)	D3ZC07_RAT [3]	107 kDa
Cluster of Protein/nucleic acid deglycase DJ-1 OS=Rattus norvegicus OX=10116 GN=Park7 PE=1 SV=1 (PARK7_RAT)	PARK7_RAT [2]	20 kDa		glucose homeostasis, insulin secretion, negative regulation of NMDA glutamate receptor activity, negative regulation of TRAIL-activated apoptotic signaling pathway, negative regulation of cysteine-type endopeptidase activity involved in apoptotic signaling pathway, negative regulation of extrinsic apoptotic signaling pathway, negative regulation of neuron apoptotic process, negative regulation of…		DNA repair, autophagy, cellular response to glyoxal, cellular response to hydrogen peroxide, cellular response to lipopolysaccharide, glycolate biosynthetic process, hydrogen peroxide metabolic process, insulin secretion, mitochondrion organization, protein deglycation, glyoxal removal, protein deglycosylation	aging	insulin secretion			insulin secretion		DNA repair, autophagy, glycolate biosynthetic process, hydrogen peroxide metabolic process, protein deglycation, glyoxal removal, protein deglycosylation	cellular response to lipopolysaccharide, fertilization, maternal process involved in female pregnancy, single fertilization, spermatogenesis	maternal process involved in female pregnancy, spermatogenesis		fertilization, maternal process involved in female pregnancy, single fertilization, spermatogenesis	fertilization, maternal process involved in female pregnancy, single fertilization, spermatogenesis	DNA repair, cellular response to glyoxal, cellular response to hydrogen peroxide, cellular response to lipopolysaccharide, cellular response to oxidative stress, detoxification of copper ion, detoxification of mercury ion, inflammatory response, response to drug				cytosol, mitochondrion				extracellular exosome	PML body, mitochondrion, nucleus	membrane raft, plasma membrane	mitochondrion	PML body, nucleus		PML body	plasma membrane				androgen receptor binding, copper ion binding, cupric ion binding, cuprous ion binding, cytokine binding, mRNA binding, mercury ion binding, protein homodimerization activity, receptor binding, repressing transcription factor binding, scaffold protein binding, small protein activating enzyme binding, superoxide dismutase copper chaperone activity, ubiquitin-like protein conjugating enzyme binding	peptidase activity, protein deglycase activity					L-dopa decarboxylase activator activity, superoxide dismutase copper chaperone activity, tyrosine 3-monooxygenase activator activity	superoxide dismutase copper chaperone activity	L-dopa decarboxylase activator activity, androgen receptor binding, copper ion binding, cupric ion binding, cuprous ion binding, cytokine binding, mRNA binding, mercury ion binding, peptidase activity, protein deglycase activity, protein homodimerization activity, receptor binding, repressing transcription factor binding, scaffold protein binding, small protein activating enzyme binding, superoxi…
Cluster of Pyridoxal kinase OS=Rattus norvegicus OX=10116 GN=Pdxk PE=1 SV=1 (G3V647_RAT)	G3V647_RAT [2]	35 kDa
Cluster of Pyruvate dehydrogenase E1 component subunit alpha OS=Rattus norvegicus OX=10116 GN=Pdha1l1 PE=1 SV=3 (D4A5G8_RAT)	D4A5G8_RAT [3]	43 kDa
Cluster of Pyruvate kinase PKM OS=Rattus norvegicus OX=10116 GN=Pkm PE=1 SV=3 (KPYM_RAT)	KPYM_RAT [4]	58 kDa		positive regulation of sprouting angiogenesis		ATP biosynthetic process, cellular response to insulin stimulus, glycolytic process, programmed cell death, protein homotetramerization, pyruvate biosynthetic process	animal organ regeneration, liver development, skeletal muscle tissue regeneration		skeletal muscle tissue regeneration				ATP biosynthetic process, glucose metabolic process, glycolytic process, pyruvate biosynthetic process		animal organ regeneration, liver development				cellular response to insulin stimulus, response to gravity, response to hypoxia, response to muscle inactivity, response to nutrient, response to organic substance, skeletal muscle tissue regeneration				cytoplasm, cytosol					nucleus			nucleus							ADP binding, ATP binding, identical protein binding, magnesium ion binding, potassium ion binding, thyroid hormone binding	kinase activity, pyruvate kinase activity							ADP binding, ATP binding, identical protein binding, kinase activity, magnesium ion binding, potassium ion binding, pyruvate kinase activity, thyroid hormone binding
Cluster of RAN-binding protein 3 OS=Rattus norvegicus OX=10116 GN=Ranbp3 PE=1 SV=2 (M0R5Q3_RAT)	M0R5Q3_RAT [3]	52 kDa
Cluster of Ras-related C3 botulinum toxin substrate 1 OS=Rattus norvegicus OX=10116 GN=Rac1 PE=1 SV=1 (A0A0G2K0X4_RAT)	A0A0G2K0X4_RAT [3]	24 kDa
Cluster of Ras-related protein Rab-3A OS=Rattus norvegicus OX=10116 GN=Rab3a PE=1 SV=1 (RAB3A_RAT)	RAB3A_RAT [20]	25 kDa		Rab protein signal transduction, bone resorption, evoked neurotransmitter secretion, glucose homeostasis, positive regulation of cell projection organization, positive regulation of corticotropin secretion, positive regulation of dopamine uptake involved in synaptic transmission, positive regulation of glucose import, positive regulation of regulated secretory pathway, protein kinase A signaling,…		Golgi to plasma membrane protein transport, Golgi vesicle fusion to target membrane, Rab protein signal transduction, acrosomal vesicle exocytosis, adherens junction organization, autophagy, axonogenesis, bicellular tight junction assembly, cellular response to insulin stimulus, cellular response to nerve growth factor stimulus, cilium assembly, cortical actin cytoskeleton organization, endotheli…	axonogenesis, establishment of Sertoli cell barrier, exocrine system development, lung development, neuron projection development, post-embryonic development, synaptic vesicle maturation	Golgi to plasma membrane protein transport, Golgi vesicle fusion to target membrane, acrosomal vesicle exocytosis, endocytic recycling, endosomal transport, evoked neurotransmitter secretion, neurotransmitter receptor transport, endosome to postsynaptic membrane, plasma membrane to endosome transport, protein import into peroxisome membrane, protein secretion, synaptic vesicle clustering, synapti…		antigen processing and presentation	Golgi to plasma membrane protein transport, Golgi vesicle fusion to target membrane, acrosomal vesicle exocytosis, endocytic recycling, endosomal transport, endothelial cell chemotaxis, evoked neurotransmitter secretion, lysosome localization, neurotransmitter receptor transport, endosome to postsynaptic membrane, plasma membrane to endosome transport, protein import into peroxisome membrane, pro…	endothelial cell chemotaxis	autophagy, peptidyl-cysteine methylation	acrosomal vesicle exocytosis	axonogenesis, bone resorption, endothelial cell chemotaxis, establishment of Sertoli cell barrier, exocrine system development, lung development, post-embryonic development, respiratory system process, sensory perception of touch		acrosomal vesicle exocytosis, establishment of Sertoli cell barrier	acrosomal vesicle exocytosis, establishment of Sertoli cell barrier	Rab protein signal transduction, cellular response to insulin stimulus, cellular response to nerve growth factor stimulus, endothelial cell chemotaxis, plasma membrane repair, protein kinase A signaling, response to electrical stimulus			Golgi membrane, trans-Golgi network, trans-Golgi network transport vesicle	Golgi apparatus, Golgi membrane, acrosomal vesicle, anchored component of synaptic vesicle membrane, centriole, clathrin-coated endocytic vesicle, cytoplasmic microtubule, cytoplasmic vesicle, cytosol, insulin-responsive compartment, lysosome, melanosome, perinuclear region of cytoplasm, peroxisomal membrane, phagocytic vesicle, phagocytic vesicle membrane, recycling endosome, recycling endosome …	centriole, centrosome, ciliary basal body, cytoplasmic microtubule		recycling endosome, recycling endosome membrane	intercellular bridge	Golgi apparatus, Golgi membrane, acrosomal vesicle, anchored component of synaptic vesicle membrane, centriole, centrosome, ciliary basal body, clathrin-coated endocytic vesicle, cytoplasmic microtubule, cytoplasmic vesicle, insulin-responsive compartment, lysosome, melanosome, nuclear body, peroxisomal membrane, phagocytic vesicle, phagocytic vesicle membrane, recycling endosome, recycling endos…	Golgi membrane, anchored component of synaptic vesicle membrane, cell projection membrane, clathrin-coated pit, intrinsic component of plasma membrane, lateral plasma membrane, peroxisomal membrane, phagocytic vesicle membrane, plasma membrane, recycling endosome membrane, secretory granule membrane		nuclear body	Golgi membrane, anchored component of synaptic vesicle membrane, peroxisomal membrane, phagocytic vesicle membrane, recycling endosome membrane, secretory granule membrane	Golgi membrane, anchored component of synaptic vesicle membrane, centriole, centrosome, ciliary basal body, ciliary base, cytoplasmic microtubule, nuclear body, peroxisomal membrane, phagocytic vesicle membrane, recycling endosome membrane, secretory granule membrane, trans-Golgi network, trans-Golgi network transport vesicle	cell projection membrane, intrinsic component of plasma membrane, lateral plasma membrane, plasma membrane				ATPase binding, GDP binding, GDP-dissociation inhibitor binding, GMP binding, GTP binding, GTP-dependent protein binding, TPR domain binding, myosin V binding, phosphatidylinositol-4,5-bisphosphate binding, protein C-terminus binding, protein kinase A catalytic subunit binding, protein kinase binding, receptor binding	GTPase activity					ATPase activator activity		ATPase activator activity, ATPase binding, GDP binding, GDP-dissociation inhibitor binding, GMP binding, GTP binding, GTP-dependent protein binding, GTPase activity, TPR domain binding, myosin V binding, phosphatidylinositol-4,5-bisphosphate binding, protein C-terminus binding, protein kinase A catalytic subunit binding, protein kinase binding, receptor binding
Cluster of RB-binding protein 4, chromatin-remodeling factor OS=Rattus norvegicus OX=10116 GN=Rbbp4 PE=1 SV=1 (B5DFB2_RAT)	B5DFB2_RAT [3]	48 kDa		negative regulation of cell growth, negative regulation of transcription from RNA polymerase II promoter		DNA replication, cellular heat acclimation, chromatin organization							DNA replication						cellular heat acclimation, response to steroid hormone				cytosol					ESC/E(Z) complex, NuRD complex, nucleus			ESC/E(Z) complex, NuRD complex, nucleus		ESC/E(Z) complex, NuRD complex					RNA binding								RNA binding
Cluster of RCG25234 OS=Rattus norvegicus OX=10116 GN=Tma7 PE=4 SV=1 (D3ZZW2_RAT)	D3ZZW2_RAT [2]	7 kDa
Cluster of RCG34610, isoform CRA_c OS=Rattus norvegicus OX=10116 GN=Srsf1 PE=1 SV=1 (D4A9L2_RAT)	D4A9L2_RAT [2]	28 kDa
Cluster of RCG60540, isoform CRA_a OS=Rattus norvegicus OX=10116 GN=U2af1 PE=1 SV=1 (Q3KR55_RAT)	Q3KR55_RAT [2]	28 kDa
Cluster of Receptor of activated protein C kinase 1 OS=Rattus norvegicus OX=10116 GN=Rack1 PE=1 SV=3 (RACK1_RAT)	RACK1_RAT [2]	35 kDa		negative regulation of Wnt signaling pathway, negative regulation of cell growth, negative regulation of phagocytosis, negative regulation of translation, positive regulation of GTPase activity, positive regulation of Golgi to plasma membrane protein transport, positive regulation of apoptotic process, positive regulation of cell migration, positive regulation of gastrulation, positive regulation…		apoptotic process, cell cycle, cellular response to growth factor stimulus, osteoblast differentiation, protein kinase C-activating G-protein coupled receptor signaling pathway, protein ubiquitination, rescue of stalled ribosome	gastrulation, osteoblast differentiation						protein ubiquitination, rescue of stalled ribosome		gastrulation, osteoblast differentiation				cellular response to growth factor stimulus, protein kinase C-activating G-protein coupled receptor signaling pathway	rhythmic process			cytosol, cytosolic small ribosomal subunit, perinuclear region of cytoplasm					cytosolic small ribosomal subunit, nucleus	phagocytic cup		nucleus		cytosolic small ribosomal subunit	phagocytic cup	cytosolic small ribosomal subunit			SH2 domain binding, enzyme binding, protein kinase C binding, receptor tyrosine kinase binding, ribosome binding						protein tyrosine kinase inhibitor activity		SH2 domain binding, enzyme binding, protein kinase C binding, protein tyrosine kinase inhibitor activity, receptor tyrosine kinase binding, ribosome binding
Cluster of Retinal dehydrogenase 1 OS=Rattus norvegicus OX=10116 GN=Aldh1a1 PE=1 SV=1 (A0A0H2UHP1_RAT)	A0A0H2UHP1_RAT [2]	57 kDa
Cluster of Rho family-interacting cell polarization regulator 2 OS=Rattus norvegicus OX=10116 GN=Ripor2 PE=1 SV=1 (RIPR2_RAT)	RIPR2_RAT [2]	145 kDa	cell adhesion	cellular iron ion homeostasis, negative regulation of Rho guanyl-nucleotide exchange factor activity, negative regulation of Rho protein signal transduction, negative regulation of T cell migration, negative regulation of cell adhesion, negative regulation of establishment of T cell polarity, negative regulation of protein localization to cell leading edge, positive regulation of filopodium assem…		cellular iron ion homeostasis, cellular response to chemokine, skeletal muscle fiber development	skeletal muscle fiber development					chemotaxis			sensory perception of sound, skeletal muscle fiber development				cellular response to chemokine, chemotaxis				cytoplasm	cytoskeleton				cytoskeleton	apical plasma membrane, stereocilium membrane				stereocilium, stereocilium membrane	apical plasma membrane, stereocilium membrane				14-3-3 protein binding, ferric iron binding								14-3-3 protein binding, ferric iron binding
Cluster of Ribose-phosphate pyrophosphokinase 1 OS=Rattus norvegicus OX=10116 GN=Prps1 PE=1 SV=2 (PRPS1_RAT)	PRPS1_RAT [2]	35 kDa				5-phosphoribose 1-diphosphate biosynthetic process, AMP biosynthetic process, nucleoside metabolic process, nucleotide biosynthetic process, ribose phosphate metabolic process	animal organ regeneration						5-phosphoribose 1-diphosphate biosynthetic process, AMP biosynthetic process, nucleoside metabolic process, nucleotide biosynthetic process, ribose phosphate metabolic process		animal organ regeneration								cytoplasm															ADP binding, AMP binding, ATP binding, GDP binding, carbohydrate binding, magnesium ion binding, protein homodimerization activity	kinase activity, ribose phosphate diphosphokinase activity							ADP binding, AMP binding, ATP binding, GDP binding, carbohydrate binding, kinase activity, magnesium ion binding, protein homodimerization activity, ribose phosphate diphosphokinase activity
Cluster of RNA transcription, translation and transport factor OS=Rattus norvegicus OX=10116 GN=Rtraf PE=1 SV=1 (F7EMB2_RAT)	F7EMB2_RAT [2]	28 kDa
Cluster of RNA-binding motif protein, X chromosome OS=Rattus norvegicus OX=10116 GN=Rbmx PE=1 SV=1 (RBMX_RAT)	RBMX_RAT [4]	42 kDa		negative regulation of mRNA splicing, via spliceosome, positive regulation of mRNA splicing, via spliceosome, positive regulation of transcription from RNA polymerase II promoter, positive regulation of transcription, DNA-templated, regulation of alternative mRNA splicing, via spliceosome		cellular response to interleukin-1, mRNA splice site selection, protein homooligomerization, transcription from RNA polymerase II promoter	multicellular organism development						mRNA splice site selection, membrane protein ectodomain proteolysis, transcription from RNA polymerase II promoter		multicellular organism development				cellular response to interleukin-1								extracellular exosome	catalytic step 2 spliceosome, nuclear euchromatin, nucleus, supraspliceosomal complex			catalytic step 2 spliceosome, nuclear euchromatin, supraspliceosomal complex		catalytic step 2 spliceosome, nuclear euchromatin, supraspliceosomal complex					RNA polymerase II core promoter proximal region sequence-specific DNA binding, chromatin binding, identical protein binding, mRNA binding, protein domain specific binding, single-stranded RNA binding								RNA polymerase II core promoter proximal region sequence-specific DNA binding, chromatin binding, identical protein binding, mRNA binding, protein domain specific binding, single-stranded RNA binding
Cluster of RNA-binding protein with serine-rich domain 1 OS=Rattus norvegicus OX=10116 GN=Rnps1 PE=2 SV=1 (RNPS1_RAT)	RNPS1_RAT [2]	34 kDa		negative regulation of mRNA splicing, via spliceosome, nuclear-transcribed mRNA catabolic process, nonsense-mediated decay, positive regulation of apoptotic process, regulation of alternative mRNA splicing, via spliceosome		RNA splicing, mRNA splicing, via spliceosome, nuclear-transcribed mRNA catabolic process, nonsense-mediated decay							RNA splicing, mRNA splicing, via spliceosome, nuclear-transcribed mRNA catabolic process, nonsense-mediated decay										cytoplasm					nuclear speck, nucleoplasm			nuclear speck, nucleoplasm		nuclear speck, nucleoplasm					mRNA 3'-UTR binding								mRNA 3'-UTR binding
Cluster of RuvB-like 1 OS=Rattus norvegicus OX=10116 GN=Ruvbl1 PE=1 SV=1 (RUVB1_RAT)	RUVB1_RAT [2]	50 kDa		positive regulation of plasminogen activation, regulation of fibroblast apoptotic process, regulation of growth, regulation of transcription from RNA polymerase II promoter		DNA recombination, DNA repair, box C/D snoRNP assembly, cell cycle, cell division, chromatin remodeling, histone H2A acetylation, histone H4 acetylation, histone acetylation							DNA recombination, DNA repair, histone H2A acetylation, histone H4 acetylation, histone acetylation						DNA repair									Ino80 complex, MLL1 complex, NuA4 histone acetyltransferase complex, Swr1 complex, nuclear matrix, nucleus			Ino80 complex, MLL1 complex, NuA4 histone acetyltransferase complex, Swr1 complex, nuclear matrix, nucleus		Ino80 complex, MLL1 complex, NuA4 histone acetyltransferase complex, Swr1 complex, nuclear matrix					ATP binding	5'-3' DNA helicase activity							5'-3' DNA helicase activity, ATP binding
Cluster of S-adenosylhomocysteine hydrolase-like protein 1 OS=Rattus norvegicus OX=10116 GN=Ahcyl1 PE=1 SV=2 (SAHH2_RAT)	SAHH2_RAT [2]	54 kDa		angiotensin-activated signaling pathway, positive regulation of sodium ion transport, regulation of anion transport, regulation of ion transmembrane transporter activity, regulation of mRNA 3'-end processing		S-adenosylmethionine cycle, angiotensin-activated signaling pathway, mRNA polyadenylation, one-carbon metabolic process		epithelial fluid transport, protein export from nucleus			epithelial fluid transport, protein export from nucleus		S-adenosylmethionine cycle, mRNA polyadenylation, one-carbon metabolic process						angiotensin-activated signaling pathway, response to calcium ion				cytosol, endoplasmic reticulum		endoplasmic reticulum			endoplasmic reticulum	apical plasma membrane					apical plasma membrane				RNA binding, identical protein binding								RNA binding, identical protein binding
Cluster of S-adenosylmethionine synthase OS=Rattus norvegicus OX=10116 GN=Mat2a PE=1 SV=2 (F1LRB8_RAT)	F1LRB8_RAT [2]	44 kDa				S-adenosylmethionine biosynthetic process, methionine catabolic process, one-carbon metabolic process, protein homooligomerization, protein homotetramerization, protein tetramerization							S-adenosylmethionine biosynthetic process, methionine catabolic process, one-carbon metabolic process										cytosol					nuclear matrix			nuclear matrix		nuclear matrix					ADP binding, ATP binding, amino acid binding, identical protein binding, magnesium ion binding, protein dimerization activity, protein homodimerization activity	methionine adenosyltransferase activity							ADP binding, ATP binding, amino acid binding, identical protein binding, magnesium ion binding, methionine adenosyltransferase activity, protein dimerization activity, protein homodimerization activity
Cluster of Sarcolemmal membrane-associated protein OS=Rattus norvegicus OX=10116 GN=Slmap PE=1 SV=1 (A0A0G2JWA5_RAT)	A0A0G2JWA5_RAT [2]	93 kDa													muscle contraction								cytoplasm	microtubule organizing center				microtubule organizing center	integral component of membrane, sarcolemma				microtubule organizing center	sarcolemma
Cluster of S-arrestin OS=Rattus norvegicus OX=10116 GN=Sag PE=1 SV=1 (ARRS_RAT)	ARRS_RAT [2]	45 kDa		G-protein coupled receptor internalization, signal transduction		G-protein coupled receptor internalization, signal transduction		G-protein coupled receptor internalization			G-protein coupled receptor internalization		G-protein coupled receptor internalization						signal transduction										membrane				photoreceptor outer segment					G-protein coupled receptor binding, spectrin binding								G-protein coupled receptor binding, spectrin binding
Cluster of Septin-7 OS=Rattus norvegicus OX=10116 GN=Sept7 PE=1 SV=3 (D4A0F5_RAT)	D4A0F5_RAT [5]	51 kDa
Cluster of Serine/threonine-protein kinase PAK 2 OS=Rattus norvegicus OX=10116 GN=Pak2 PE=1 SV=1 (PAK2_RAT)	PAK2_RAT [3]	58 kDa		activation of protein kinase activity, intracellular signal transduction, negative regulation of cysteine-type endopeptidase activity involved in execution phase of apoptosis, positive regulation of DNA biosynthetic process, positive regulation of dendritic spine morphogenesis, positive regulation of fibroblast migration, positive regulation of neuron apoptotic process, regulation of actin cytosk…		axonogenesis, cellular response to organic cyclic compound, cellular response to transforming growth factor beta stimulus, dendrite development, dendritic spine morphogenesis, intracellular signal transduction, positive regulation of dendritic spine morphogenesis, protein phosphorylation, regulation of actin filament polymerization, regulation of axonogenesis, signal transduction by protein phosp…	axonogenesis, dendrite development, dendritic spine morphogenesis, positive regulation of dendritic spine morphogenesis, regulation of axonogenesis						protein phosphorylation, signal transduction by protein phosphorylation		axonogenesis, cardiac muscle hypertrophy, dendrite development, dendritic spine morphogenesis, positive regulation of dendritic spine morphogenesis, regulation of axonogenesis				cellular response to organic cyclic compound, cellular response to transforming growth factor beta stimulus, intracellular signal transduction, signal transduction by protein phosphorylation				cytoplasm, endosome, perinuclear region of cytoplasm, secretory granule			endosome		endosome, nucleus, secretory granule	membrane		nucleus							ATP binding, Rho GTPase binding, SH3 domain binding, metal ion binding	MAP kinase kinase activity, protein serine/threonine kinase activity							ATP binding, MAP kinase kinase activity, Rho GTPase binding, SH3 domain binding, metal ion binding, protein serine/threonine kinase activity
Cluster of Serine/threonine-protein phosphatase 2A catalytic subunit alpha isoform OS=Rattus norvegicus OX=10116 GN=Ppp2ca PE=1 SV=1 (PP2AA_RAT)	PP2AA_RAT [4]	36 kDa		cellular response to glucose stimulus, negative regulation of Ras protein signal transduction, negative regulation of calcium ion transmembrane transporter activity, negative regulation of protein import into nucleus, negative regulation of protein phosphorylation, negative regulation of transcription from RNA polymerase II promoter, positive regulation of cysteine-type endopeptidase activity inv…		apoptotic mitochondrial changes, cellular response to calcium ion, cellular response to cytokine stimulus, cellular response to ethanol, cellular response to follicle-stimulating hormone stimulus, cellular response to glucose stimulus, cellular response to insulin stimulus, cellular response to steroid hormone stimulus, meiotic cell cycle, proteasome-mediated ubiquitin-dependent protein catabolic…	cardiac ventricle development, heart development						proteasome-mediated ubiquitin-dependent protein catabolic process, protein dephosphorylation		cardiac ventricle development		meiotic cell cycle	meiotic cell cycle	cellular response to calcium ion, cellular response to cytokine stimulus, cellular response to ethanol, cellular response to follicle-stimulating hormone stimulus, cellular response to glucose stimulus, cellular response to insulin stimulus, cellular response to steroid hormone stimulus, response to endoplasmic reticulum stress, response to hydrogen peroxide, response to lead ion				cytoplasm, cytosol	spindle pole				chromosome, centromeric region, nucleus, spindle pole	membrane raft		nucleus		chromosome, centromeric region, spindle pole					beta-2 adrenergic receptor binding, identical protein binding, ion channel binding, macromolecular complex binding, metal ion binding, protein C-terminus binding, protein antigen binding, protein domain specific binding, protein heterodimerization activity, protein kinase B binding, protein phosphatase 2A binding, tau protein binding	protein serine/threonine phosphatase activity							beta-2 adrenergic receptor binding, identical protein binding, ion channel binding, macromolecular complex binding, metal ion binding, protein C-terminus binding, protein antigen binding, protein domain specific binding, protein heterodimerization activity, protein kinase B binding, protein phosphatase 2A binding, protein serine/threonine phosphatase activity, tau protein binding
Cluster of Serine/threonine-protein phosphatase 2B catalytic subunit alpha isoform OS=Rattus norvegicus OX=10116 GN=Ppp3ca PE=1 SV=1 (PP2BA_RAT)	PP2BA_RAT [2]	59 kDa		calcineurin-NFAT signaling cascade, calcineurin-mediated signaling, cellular response to glucose stimulus, excitatory postsynaptic potential, muscle cell cellular homeostasis, negative regulation of calcium ion-dependent exocytosis, negative regulation of chromatin binding, negative regulation of dendrite morphogenesis, negative regulation of insulin secretion, negative regulation of production o…		G1/S transition of mitotic cell cycle, calcineurin-NFAT signaling cascade, calcineurin-mediated signaling, calcium ion regulated exocytosis, cellular response to drug, cellular response to glucose stimulus, excitatory postsynaptic potential, muscle cell cellular homeostasis, negative regulation of dendrite morphogenesis, peptidyl-serine dephosphorylation, protein phosphorylation, skeletal muscle …	aging, brain development, negative regulation of dendrite morphogenesis, skeletal muscle fiber development	calcium ion regulated exocytosis, calcium ion transport, protein import into nucleus			calcium ion regulated exocytosis, calcium ion transport, protein import into nucleus		peptidyl-serine dephosphorylation, protein phosphorylation		brain development, cardiac muscle hypertrophy in response to stress, multicellular organismal response to stress, negative regulation of dendrite morphogenesis, skeletal muscle fiber development				calcineurin-NFAT signaling cascade, calcineurin-mediated signaling, cardiac muscle hypertrophy in response to stress, cellular response to drug, cellular response to glucose stimulus, excitatory postsynaptic potential, multicellular organismal response to stress, response to amphetamine, response to calcium ion				Z disc, cytosol, mitochondrion					Z disc, mitochondrion, nucleoplasm	cytoplasmic side of plasma membrane, plasma membrane, sarcolemma	mitochondrion	nucleoplasm		Z disc, nucleoplasm	cytoplasmic side of plasma membrane, plasma membrane, sarcolemma				calcium ion binding, calmodulin binding, cyclosporin A binding, enzyme binding, protein heterodimerization activity, protein phosphatase 2B binding	calcium-dependent protein serine/threonine phosphatase activity, calmodulin-dependent protein phosphatase activity							calcium ion binding, calcium-dependent protein serine/threonine phosphatase activity, calmodulin binding, calmodulin-dependent protein phosphatase activity, cyclosporin A binding, enzyme binding, protein heterodimerization activity, protein phosphatase 2B binding
Cluster of Serine/threonine-protein phosphatase PP1-beta catalytic subunit OS=Rattus norvegicus OX=10116 GN=Ppp1cb PE=1 SV=3 (PP1B_RAT)	PP1B_RAT [3]	37 kDa		circadian regulation of gene expression, entrainment of circadian clock by photoperiod, positive regulation of extrinsic apoptotic signaling pathway in absence of ligand, positive regulation of glial cell proliferation, regulation of cell adhesion, regulation of glycogen biosynthetic process, regulation of glycogen catabolic process, regulation of nucleocytoplasmic transport		cell cycle, cell division, glycogen metabolic process, neuron differentiation, positive regulation of glial cell proliferation, protein dephosphorylation	branching morphogenesis of an epithelial tube, lung development, neuron differentiation, positive regulation of glial cell proliferation						glycogen metabolic process, protein dephosphorylation		branching morphogenesis of an epithelial tube, circadian regulation of gene expression, lung development, neuron differentiation, positive regulation of glial cell proliferation				entrainment of circadian clock by photoperiod, response to lead ion	circadian regulation of gene expression			cytosol, glycogen granule, mitochondrial outer membrane, mitochondrion, protein phosphatase type 1 complex					condensed chromosome kinetochore, mitochondrial outer membrane, mitochondrion, nuclear chromosome, telomeric region, nuclear speck, nucleolus, nucleoplasm, nucleus	mitochondrial outer membrane, plasma membrane	mitochondrial outer membrane, mitochondrion	nuclear chromosome, telomeric region, nuclear speck, nucleolus, nucleoplasm	mitochondrial outer membrane	condensed chromosome kinetochore, mitochondrial outer membrane, nuclear chromosome, telomeric region, nuclear speck, nucleolus, nucleoplasm	plasma membrane				cadherin binding involved in cell-cell adhesion, lamin binding, macromolecular complex binding, metal ion binding, protein C-terminus binding, protein N-terminus binding, protein domain specific binding, protein kinase binding, protein phosphatase 1 binding, ribonucleoprotein complex binding	myosin phosphatase activity, myosin-light-chain-phosphatase activity, phosphoprotein phosphatase activity, protein serine/threonine phosphatase activity							cadherin binding involved in cell-cell adhesion, lamin binding, macromolecular complex binding, metal ion binding, myosin phosphatase activity, myosin-light-chain-phosphatase activity, phosphoprotein phosphatase activity, protein C-terminus binding, protein N-terminus binding, protein domain specific binding, protein kinase binding, protein phosphatase 1 binding, protein serine/threonine phosphat…
Cluster of Serotransferrin OS=Rattus norvegicus OX=10116 GN=Tf PE=1 SV=3 (TRFE_RAT)	TRFE_RAT [2]	76 kDa		cellular iron ion homeostasis, positive regulation of myelination, positive regulation of oligodendrocyte progenitor proliferation		apoptotic process, cellular iron ion homeostasis, cellular response to cAMP, cellular response to follicle-stimulating hormone stimulus, positive regulation of oligodendrocyte progenitor proliferation	positive regulation of oligodendrocyte progenitor proliferation	iron ion transport			iron ion transport				positive regulation of oligodendrocyte progenitor proliferation				acute-phase response, cellular response to cAMP, cellular response to follicle-stimulating hormone stimulus, response to hypoxia, response to lead ion, response to organic cyclic compound								basement membrane, extracellular space											ferric iron binding								ferric iron binding, ferric iron transmembrane transporter activity
Cluster of Similar to 25 kDa brain-specific protein (P25-alpha) (Predicted), isoform CRA_a OS=Rattus norvegicus OX=10116 GN=Tppp PE=1 SV=1 (D3ZQL7_RAT)	D3ZQL7_RAT [2]	24 kDa
Cluster of Small nuclear ribonucleoprotein Sm D2 OS=Rattus norvegicus OX=10116 GN=Snrpd2 PE=1 SV=1 (B5DES0_RAT)	B5DES0_RAT [2]	14 kDa
Cluster of Small ubiquitin-related modifier 2 OS=Rattus norvegicus OX=10116 GN=Sumo2 PE=1 SV=1 (SUMO2_RAT)	SUMO2_RAT [2]	11 kDa		negative regulation of DNA binding, negative regulation of transcription, DNA-templated, positive regulation of protein sumoylation		protein sumoylation					cellular protein localization		protein sumoylation										cytoplasm					PML body, nucleus			PML body		PML body					enzyme binding, retinoid X receptor binding, ubiquitin protein ligase binding								enzyme binding, retinoid X receptor binding, ubiquitin protein ligase binding
Cluster of Sodium/potassium-transporting ATPase subunit alpha-3 OS=Rattus norvegicus OX=10116 GN=Atp1a3 PE=1 SV=2 (AT1A3_RAT)	AT1A3_RAT [8]	112 kDa		cellular potassium ion homeostasis, cellular sodium ion homeostasis, ionotropic glutamate receptor signaling pathway, membrane hyperpolarization, membrane repolarization, negative regulation of calcium ion transmembrane transport, negative regulation of calcium:sodium antiporter activity, negative regulation of cytosolic calcium ion concentration, negative regulation of glucocorticoid biosyntheti…		ATP metabolic process, cellular potassium ion homeostasis, cellular response to beta-amyloid, cellular response to mechanical stimulus, cellular response to retinoic acid, cellular response to steroid hormone stimulus, cellular response to thyroid hormone stimulus, cellular sodium ion homeostasis, flagellated sperm motility, ionotropic glutamate receptor signaling pathway, negative regulation of …	cerebral cortex development	energy coupled proton transmembrane transport, against electrochemical gradient, establishment or maintenance of transmembrane electrochemical gradient, membrane repolarization, neurotransmitter uptake, potassium ion import across plasma membrane, potassium ion transport, sodium ion export from cell, transmembrane transport			energy coupled proton transmembrane transport, against electrochemical gradient, establishment or maintenance of transmembrane electrochemical gradient, flagellated sperm motility, membrane repolarization, neurotransmitter uptake, potassium ion import across plasma membrane, potassium ion transport, sodium ion export from cell, transmembrane transport	flagellated sperm motility	ATP metabolic process	fertilization, spermatogenesis	adult locomotory behavior, cardiac muscle contraction, cerebral cortex development, memory, regulation of blood pressure, regulation of respiratory gaseous exchange by neurological system process, regulation of vasoconstriction, relaxation of cardiac muscle, spermatogenesis, visual learning		fertilization, spermatogenesis	fertilization, spermatogenesis	cellular response to beta-amyloid, cellular response to mechanical stimulus, cellular response to retinoic acid, cellular response to steroid hormone stimulus, cellular response to thyroid hormone stimulus, ionotropic glutamate receptor signaling pathway, regulation of cardiac muscle contraction by calcium ion signaling, response to drug, response to glycoside, response to nicotine, visual learni…			Golgi apparatus	Golgi apparatus, endoplasmic reticulum, endosome		endoplasmic reticulum	endosome		Golgi apparatus, endoplasmic reticulum, endosome, nucleus	T-tubule, apical plasma membrane, basolateral plasma membrane, caveola, integral component of presynaptic membrane, plasma membrane, sarcolemma, sodium:potassium-exchanging ATPase complex		nucleus			T-tubule, apical plasma membrane, basolateral plasma membrane, caveola, integral component of presynaptic membrane, sarcolemma, sodium:potassium-exchanging ATPase complex				ADP binding, ATP binding, D1 dopamine receptor binding, ankyrin binding, beta-amyloid binding, chaperone binding, heparan sulfate proteoglycan binding, metal ion binding, phosphatidylinositol 3-kinase binding, potassium ion binding, protein domain specific binding, protein kinase binding, sodium ion binding, steroid hormone binding	ATPase activity, cation-transporting ATPase activity, phosphatase activity, sodium:potassium-exchanging ATPase activity involved in regulation of cardiac muscle cell membrane potential							ADP binding, ATP binding, ATPase activity, D1 dopamine receptor binding, ankyrin binding, beta-amyloid binding, cation-transporting ATPase activity, chaperone binding, heparan sulfate proteoglycan binding, metal ion binding, phosphatase activity, phosphatidylinositol 3-kinase binding, potassium ion binding, protein domain specific binding, protein kinase binding, sodium ion binding, sodium:potass…
Cluster of Solute carrier family 12 member 5 OS=Rattus norvegicus OX=10116 GN=Slc12a5 PE=1 SV=2 (S12A5_RAT)	S12A5_RAT [2]	126 kDa		cell volume homeostasis, chloride ion homeostasis, intracellular pH reduction, potassium ion homeostasis		cell volume homeostasis, chemical synaptic transmission, dendritic spine development, intracellular pH reduction, potassium ion import across plasma membrane	dendritic spine development	ammonium transport, chloride transmembrane transport, potassium ion import across plasma membrane, potassium ion transport			ammonium transport, chloride transmembrane transport, potassium ion import across plasma membrane, potassium ion transport				dendritic spine development														dendrite membrane, integral component of plasma membrane, plasma membrane					dendrite membrane, integral component of plasma membrane												ammonium transmembrane transporter activity, potassium:chloride symporter activity
Cluster of Spectrin alpha chain, non-erythrocytic 1 OS=Rattus norvegicus OX=10116 GN=Sptan1 PE=1 SV=1 (A0A0G2JZ69_RAT)	A0A0G2JZ69_RAT [2]	287 kDa
Cluster of Spliceosome RNA helicase Ddx39b OS=Rattus norvegicus OX=10116 GN=Ddx39b PE=2 SV=3 (DX39B_RAT)	DX39B_RAT [2]	49 kDa		negative regulation of DNA damage checkpoint, positive regulation of DNA biosynthetic process, positive regulation of DNA-templated transcription, elongation, positive regulation of cell growth involved in cardiac muscle cell development, positive regulation of translation, positive regulation of vascular smooth muscle cell proliferation		RNA secondary structure unwinding, mRNA splicing, via spliceosome, spliceosomal complex assembly, viral mRNA export from host cell nucleus	liver development	mRNA export from nucleus, viral mRNA export from host cell nucleus			mRNA export from nucleus, viral mRNA export from host cell nucleus		RNA secondary structure unwinding, mRNA export from nucleus, mRNA splicing, via spliceosome, spliceosomal complex assembly, viral mRNA export from host cell nucleus	viral mRNA export from host cell nucleus	liver development						viral mRNA export from host cell nucleus		cytoplasm					U4 snRNP, U6 snRNP, nuclear matrix, nuclear speck, spliceosomal complex, transcription export complex			U4 snRNP, U6 snRNP, nuclear matrix, nuclear speck, spliceosomal complex, transcription export complex		U4 snRNP, U6 snRNP, nuclear matrix, nuclear speck, spliceosomal complex, transcription export complex					ATP binding, ATP-dependent protein binding, U4 snRNA binding, U6 snRNA binding, identical protein binding, macromolecular complex binding	RNA helicase activity, RNA-dependent ATPase activity							ATP binding, ATP-dependent protein binding, RNA helicase activity, RNA-dependent ATPase activity, U4 snRNA binding, U6 snRNA binding, identical protein binding, macromolecular complex binding
Cluster of Splicing factor 3a, subunit 3 OS=Rattus norvegicus OX=10116 GN=Sf3a3 PE=1 SV=1 (Q4KLI7_RAT)	Q4KLI7_RAT [2]	59 kDa
Cluster of Stathmin (Fragment) OS=Rattus norvegicus OX=10116 GN=Stmn1 PE=1 SV=1 (A0A096MK73_RAT)	A0A096MK73_RAT [3]	15 kDa
Cluster of Synaptosomal-associated protein 25 OS=Rattus norvegicus OX=10116 GN=Snap25 PE=1 SV=1 (SNP25_RAT)	SNP25_RAT [2]	23 kDa		calcium ion-regulated exocytosis of neurotransmitter, growth hormone secretion, positive regulation of hormone secretion, positive regulation of insulin secretion, regulation of neuron projection development, regulation of synapse assembly, synaptic vesicle fusion to presynaptic active zone membrane, synaptic vesicle priming		SNARE complex assembly, axonogenesis, calcium ion-regulated exocytosis of neurotransmitter, growth hormone secretion, neuron differentiation, regulation of neuron projection development, synaptic vesicle exocytosis, synaptic vesicle fusion to presynaptic active zone membrane, synaptic vesicle priming	axonogenesis, neuron differentiation, regulation of neuron projection development	SNARE complex assembly, calcium ion-regulated exocytosis of neurotransmitter, endosomal transport, growth hormone secretion, synaptic vesicle fusion to presynaptic active zone membrane, synaptic vesicle priming			SNARE complex assembly, calcium ion-regulated exocytosis of neurotransmitter, endosomal transport, growth hormone secretion, synaptic vesicle fusion to presynaptic active zone membrane, synaptic vesicle priming				axonogenesis, long-term memory, regulation of neuron projection development, sleep								SNARE complex, cytoplasm, cytosol, endosome, perinuclear region of cytoplasm, synaptobrevin 2-SNAP-25-syntaxin-1a complex, synaptobrevin 2-SNAP-25-syntaxin-1a-complexin I complex, synaptobrevin 2-SNAP-25-syntaxin-1a-complexin II complex	actin cytoskeleton		endosome		actin cytoskeleton, endosome, intracellular organelle	SNARE complex, anchored component of presynaptic membrane, membrane raft, plasma membrane, presynaptic active zone membrane, synaptobrevin 2-SNAP-25-syntaxin-1a complex, synaptobrevin 2-SNAP-25-syntaxin-1a-complexin I complex, synaptobrevin 2-SNAP-25-syntaxin-1a-complexin II complex, voltage-gated potassium channel complex					anchored component of presynaptic membrane, plasma membrane, presynaptic active zone membrane, voltage-gated potassium channel complex				SNAP receptor activity, SNARE binding, calcium-dependent protein binding, ion channel binding, myosin binding, protein N-terminus binding, protein domain specific binding, syntaxin binding, syntaxin-1 binding								SNAP receptor activity, SNARE binding, calcium-dependent protein binding, ion channel binding, myosin binding, protein N-terminus binding, protein domain specific binding, syntaxin binding, syntaxin-1 binding, voltage-gated potassium channel activity
Cluster of Synaptotagmin-1 OS=Rattus norvegicus OX=10116 GN=Syt1 PE=1 SV=3 (SYT1_RAT)	SYT1_RAT [3]	47 kDa		calcium-dependent activation of synaptic vesicle fusion, fast, calcium ion-dependent exocytosis of neurotransmitter, positive regulation of calcium ion-dependent exocytosis, positive regulation of calcium ion-dependent exocytosis of neurotransmitter, positive regulation of dendrite extension, positive regulation of synaptic transmission, positive regulation of vesicle fusion, regulation of calciu…		calcium-dependent activation of synaptic vesicle fusion, cellular response to calcium ion, fast, calcium ion-dependent exocytosis of neurotransmitter, positive regulation of dendrite extension, protein heterooligomerization, spontaneous neurotransmitter secretion, synchronous neurotransmitter secretion, vesicle docking	brain development, positive regulation of dendrite extension	calcium-dependent activation of synaptic vesicle fusion, fast, calcium ion-dependent exocytosis of neurotransmitter, spontaneous neurotransmitter secretion, synaptic vesicle endocytosis, synchronous neurotransmitter secretion, vesicle docking			calcium-dependent activation of synaptic vesicle fusion, fast, calcium ion-dependent exocytosis of neurotransmitter, spontaneous neurotransmitter secretion, synaptic vesicle endocytosis, synchronous neurotransmitter secretion, vesicle docking				brain development, positive regulation of dendrite extension				cellular response to calcium ion, detection of calcium ion, response to calcium ion			Golgi apparatus	Golgi apparatus, chromaffin granule membrane, dense core granule, exocytic vesicle, integral component of neuronal dense core vesicle membrane, integral component of synaptic vesicle membrane, perinuclear region of cytoplasm, recycling endosome membrane, synaptic vesicle, synaptic vesicle membrane			recycling endosome membrane		Golgi apparatus, chromaffin granule membrane, dense core granule, exocytic vesicle, integral component of neuronal dense core vesicle membrane, integral component of synaptic vesicle membrane, recycling endosome membrane, synaptic vesicle, synaptic vesicle membrane	chromaffin granule membrane, integral component of neuronal dense core vesicle membrane, integral component of synaptic vesicle membrane, plasma membrane, presynaptic membrane, recycling endosome membrane, synaptic vesicle membrane			chromaffin granule membrane, integral component of neuronal dense core vesicle membrane, integral component of synaptic vesicle membrane, recycling endosome membrane, synaptic vesicle membrane	chromaffin granule membrane, integral component of neuronal dense core vesicle membrane, integral component of synaptic vesicle membrane, recycling endosome membrane, synaptic vesicle membrane	plasma membrane, presynaptic membrane				calcium ion binding, calcium-dependent phospholipid binding, calcium-dependent protein binding, calmodulin binding, clathrin binding, low-density lipoprotein particle receptor binding, phosphatidylinositol-4,5-bisphosphate binding, phosphatidylserine binding, protein C-terminus binding, protein heterodimerization activity, protein homodimerization activity, syntaxin-1 binding, syntaxin-3 binding								calcium ion binding, calcium-dependent phospholipid binding, calcium-dependent protein binding, calmodulin binding, clathrin binding, low-density lipoprotein particle receptor binding, phosphatidylinositol-4,5-bisphosphate binding, phosphatidylserine binding, protein C-terminus binding, protein heterodimerization activity, protein homodimerization activity, syntaxin-1 binding, syntaxin-3 binding
Cluster of Talin 2 OS=Rattus norvegicus OX=10116 GN=Tln2 PE=1 SV=3 (D3ZE09_RAT)	D3ZE09_RAT [3]	153 kDa
Cluster of Thioredoxin reductase 1, cytoplasmic OS=Rattus norvegicus OX=10116 GN=Txnrd1 PE=3 SV=2 (R9PXU4_RAT)	R9PXU4_RAT [3]	55 kDa
Cluster of Transcription elongation factor A (SII)-like 6 OS=Rattus norvegicus OX=10116 GN=Tceal6 PE=1 SV=1 (M0RBL8_RAT)	M0RBL8_RAT [2]	22 kDa
Cluster of Transcription factor BTF3 OS=Rattus norvegicus OX=10116 GN=Btf3l4 PE=1 SV=1 (D4A3I4_RAT)	D4A3I4_RAT [2]	17 kDa
Cluster of Transcriptional activator protein Pur-beta OS=Rattus norvegicus OX=10116 GN=Purb PE=1 SV=1 (A0A0G2JUX5_RAT)	A0A0G2JUX5_RAT [3]	34 kDa		negative regulation of transcription, DNA-templated		cell differentiation	cell differentiation																					DNA replication factor A complex, nucleus			DNA replication factor A complex, nucleus		DNA replication factor A complex					RNA polymerase II regulatory region sequence-specific DNA binding, double-stranded DNA binding, mRNA binding, purine-rich negative regulatory element binding, sequence-specific DNA binding, single-stranded DNA binding, transcription factor binding, translation repressor activity, nucleic acid binding								RNA polymerase II regulatory region sequence-specific DNA binding, double-stranded DNA binding, mRNA binding, purine-rich negative regulatory element binding, sequence-specific DNA binding, single-stranded DNA binding, transcription factor binding, transcriptional repressor activity, RNA polymerase II transcription regulatory region sequence-specific binding, translation repressor activity, nucle…
Cluster of Transketolase OS=Rattus norvegicus OX=10116 GN=Tkt PE=1 SV=1 (TKT_RAT)	TKT_RAT [2]	68 kDa				pentose-phosphate shunt, pentose-phosphate shunt, non-oxidative branch, ribose phosphate biosynthetic process							pentose-phosphate shunt, pentose-phosphate shunt, non-oxidative branch, ribose phosphate biosynthetic process										endoplasmic reticulum membrane, peroxisome		endoplasmic reticulum membrane			endoplasmic reticulum membrane, intracellular membrane-bounded organelle, peroxisome	endoplasmic reticulum membrane				endoplasmic reticulum membrane					magnesium ion binding, monosaccharide binding, thiamine pyrophosphate binding	transketolase activity							magnesium ion binding, monosaccharide binding, thiamine pyrophosphate binding, transketolase activity
Cluster of Translocase of inner mitochondrial membrane 8A1 OS=Rattus norvegicus OX=10116 GN=Timm8a1 PE=1 SV=3 (F1LP21_RAT)	F1LP21_RAT [3]	11 kDa
Cluster of Triosephosphate isomerase OS=Rattus norvegicus OX=10116 GN=Tpi1 PE=1 SV=2 (TPIS_RAT)	TPIS_RAT [2]	27 kDa				glyceraldehyde-3-phosphate biosynthetic process, glycerol catabolic process, glycolytic process, methylglyoxal biosynthetic process							carbohydrate metabolic process, gluconeogenesis, glyceraldehyde-3-phosphate biosynthetic process, glycerol catabolic process, glycolytic process, methylglyoxal biosynthetic process										cytosol					nucleus			nucleus							protein homodimerization activity	methylglyoxal synthase activity, triose-phosphate isomerase activity							methylglyoxal synthase activity, protein homodimerization activity, triose-phosphate isomerase activity
Cluster of Tropomyosin alpha-3 chain OS=Rattus norvegicus OX=10116 GN=Tpm3 PE=1 SV=2 (TPM3_RAT)	TPM3_RAT [6]	29 kDa		actin filament capping, negative regulation of cell migration, positive regulation of ATPase activity, positive regulation of cell adhesion, positive regulation of stress fiber assembly		actin filament capping, actin filament organization, muscle filament sliding, ruffle organization	brain development								brain development, cardiac muscle contraction, muscle contraction, muscle filament sliding				wound healing				cortical cytoskeleton	actin cytoskeleton, actin filament, cortical cytoskeleton, podosome				actin cytoskeleton, actin filament, cortical cytoskeleton, podosome					actin filament, podosome					actin filament binding, disordered domain specific binding, metal ion binding, protein N-terminus binding, protein heterodimerization activity, protein homodimerization activity								actin filament binding, disordered domain specific binding, metal ion binding, protein N-terminus binding, protein heterodimerization activity, protein homodimerization activity
Cluster of Tubulin alpha-4A chain OS=Rattus norvegicus OX=10116 GN=Tuba4a PE=1 SV=1 (TBA4A_RAT)	TBA4A_RAT [5]	50 kDa		regulation of synapse organization		microtubule cytoskeleton organization, microtubule-based process, mitotic cell cycle																	cytoplasmic microtubule, cytoplasmic ribonucleoprotein granule, recycling endosome	cytoplasmic microtubule		recycling endosome		cytoplasmic microtubule, cytoplasmic ribonucleoprotein granule, recycling endosome	membrane raft				cytoplasmic microtubule					GTP binding, protein domain specific binding, protein heterodimerization activity, protein kinase binding	GTPase activity							GTP binding, GTPase activity, protein domain specific binding, protein heterodimerization activity, protein kinase binding, structural constituent of cytoskeleton
Cluster of Tubulin beta-5 chain OS=Rattus norvegicus OX=10116 GN=Tubb5 PE=1 SV=1 (TBB5_RAT)	TBB5_RAT [8]	50 kDa		modulation of synaptic transmission, netrin-activated signaling pathway, positive regulation of axon guidance, regulation of synapse organization		axon guidance, microtubule-based process, mitotic cell cycle, netrin-activated signaling pathway, neuron differentiation, neuron migration, positive regulation of axon guidance, spindle assembly	axon guidance, dorsal root ganglion development, embryonic brain development, neuron differentiation, neuron migration, positive regulation of axon guidance				neuron migration	axon guidance, neuron migration			axon guidance, dorsal root ganglion development, embryonic brain development, neuron migration, positive regulation of axon guidance				axon guidance, netrin-activated signaling pathway				cytoplasmic ribonucleoprotein granule	microtubule, microtubule cytoskeleton				cytoplasmic ribonucleoprotein granule, microtubule, microtubule cytoskeleton, nuclear envelope lumen	membrane raft		nuclear envelope lumen		microtubule, nuclear envelope lumen					GTP binding, GTPase activating protein binding, MHC class I protein binding, macromolecular complex binding, netrin receptor binding, peptide binding, protein domain specific binding, protein heterodimerization activity, ubiquitin protein ligase binding	GTPase activity							GTP binding, GTPase activating protein binding, GTPase activity, MHC class I protein binding, macromolecular complex binding, netrin receptor binding, peptide binding, protein domain specific binding, protein heterodimerization activity, structural constituent of cytoskeleton, ubiquitin protein ligase binding
Cluster of Ubiquitin-40S ribosomal protein S27a OS=Rattus norvegicus OX=10116 GN=Rps27a PE=1 SV=2 (RS27A_RAT)	RS27A_RAT [3]	18 kDa				modification-dependent protein catabolic process, protein ubiquitination, translation							modification-dependent protein catabolic process, protein ubiquitination, translation										cytosolic small ribosomal subunit					cytosolic small ribosomal subunit, nucleus			nucleus		cytosolic small ribosomal subunit		cytosolic small ribosomal subunit			metal ion binding, ubiquitin protein ligase binding								metal ion binding, protein tag, structural constituent of ribosome, ubiquitin protein ligase binding
Cluster of Ubiquitin-conjugating enzyme E2 variant 2 OS=Rattus norvegicus OX=10116 GN=Ube2v2 PE=1 SV=3 (UB2V2_RAT)	UB2V2_RAT [4]	16 kDa		negative regulation of neuron apoptotic process, positive regulation of DNA repair, positive regulation of neuron projection development, positive regulation of proteasomal ubiquitin-dependent protein catabolic process, positive regulation of synapse assembly		DNA double-strand break processing, error-free postreplication DNA repair, positive regulation of neuron projection development, protein K63-linked ubiquitination	positive regulation of neuron projection development						DNA double-strand break processing, error-free postreplication DNA repair, protein K63-linked ubiquitination		positive regulation of neuron projection development				DNA double-strand break processing, error-free postreplication DNA repair									nucleoplasm, nucleus			nucleoplasm, nucleus		nucleoplasm						ubiquitin conjugating enzyme activity							ubiquitin conjugating enzyme activity
Cluster of Ubiquitin-like modifier-activating enzyme 1 OS=Rattus norvegicus OX=10116 GN=Uba1 PE=1 SV=1 (UBA1_RAT)	UBA1_RAT [2]	118 kDa				cellular response to DNA damage stimulus, protein modification by small protein conjugation, protein ubiquitination, ubiquitin-dependent protein catabolic process							protein modification by small protein conjugation, protein ubiquitination, ubiquitin-dependent protein catabolic process						cellular response to DNA damage stimulus				cytosol, endosome membrane, lysosomal membrane, mitochondrion, rough endoplasmic reticulum membrane		rough endoplasmic reticulum membrane	endosome membrane		endosome membrane, heterochromatin, lysosomal membrane, mitochondrion, nucleoplasm, nucleus, rough endoplasmic reticulum membrane	endosome membrane, lysosomal membrane, rough endoplasmic reticulum membrane	mitochondrion	nucleoplasm	endosome membrane, lysosomal membrane, rough endoplasmic reticulum membrane	endosome membrane, heterochromatin, lysosomal membrane, nucleoplasm, rough endoplasmic reticulum membrane					ATP binding	ubiquitin activating enzyme activity							ATP binding, ubiquitin activating enzyme activity
Cluster of Ubiquitin-specific peptidase 14 OS=Rattus norvegicus OX=10116 GN=Usp14 PE=1 SV=1 (A0A0G2JVV5_RAT)	A0A0G2JVV5_RAT [2]	52 kDa
Cluster of Uncharacterized protein OS=Rattus norvegicus OX=10116 PE=1 SV=3 (F1M269_RAT)	F1M269_RAT [19]	27 kDa		cAMP-mediated signaling, negative regulation of vascular associated smooth muscle cell apoptotic process, protein stabilization, regulation of translation		cAMP-mediated signaling, glycolytic process, microtubule cytoskeleton organization, neuron apoptotic process, peptidyl-cysteine S-trans-nitrosylation, protein homotetramerization							carbohydrate metabolic process, gluconeogenesis, glycolytic process, peptidyl-cysteine S-trans-nitrosylation	female pregnancy	female pregnancy		female pregnancy	female pregnancy	cAMP-mediated signaling, response to ammonium ion				cytoplasm, cytosol	microtubule cytoskeleton				microtubule cytoskeleton, nucleus			nucleus		postsynaptic density, intracellular component					NAD binding, NADP binding, microtubule binding, protein homodimerization activity	glyceraldehyde-3-phosphate dehydrogenase (NAD+) (phosphorylating) activity, peptidyl-cysteine S-nitrosylase activity							NAD binding, NADP binding, glyceraldehyde-3-phosphate dehydrogenase (NAD+) (phosphorylating) activity, microtubule binding, peptidyl-cysteine S-nitrosylase activity, protein homodimerization activity
Cluster of Uncharacterized protein OS=Rattus norvegicus OX=10116 PE=3 SV=1 (A0A0G2K6L6_RAT)	A0A0G2K6L6_RAT [2]	13 kDa
Cluster of Uncharacterized protein OS=Rattus norvegicus OX=10116 PE=3 SV=1 (M0RCB1_RAT)	M0RCB1_RAT [5]	70 kDa
Cluster of Uncharacterized protein OS=Rattus norvegicus OX=10116 PE=4 SV=1 (A0A0G2JZW1_RAT)	A0A0G2JZW1_RAT [2]	24 kDa
Cluster of Uncharacterized protein OS=Rattus norvegicus OX=10116 PE=4 SV=2 (D3ZS25_RAT)	D3ZS25_RAT [9]	24 kDa
Cluster of Vesicle-associated membrane protein 2 OS=Rattus norvegicus OX=10116 GN=Vamp2 PE=1 SV=2 (VAMP2_RAT)	VAMP2_RAT [3]	13 kDa	substrate adhesion-dependent cell spreading	exocytic insertion of neurotransmitter receptor to postsynaptic membrane, hormone secretion, long-term synaptic potentiation, negative regulation of secretion by cell, positive regulation of intracellular protein transport, positive regulation of receptor recycling, regulation of delayed rectifier potassium channel activity, regulation of exocytosis, regulation of synaptic vesicle fusion to presy…		Golgi to plasma membrane protein transport, SNARE complex assembly, calcium ion regulated exocytosis, cellular response to insulin stimulus, cellular response to interferon-gamma, exocytic insertion of neurotransmitter receptor to postsynaptic membrane, hormone secretion, substrate adhesion-dependent cell spreading, synaptic vesicle docking, synaptic vesicle exocytosis, synaptic vesicle priming	substrate adhesion-dependent cell spreading	Golgi to plasma membrane protein transport, SNARE complex assembly, exocytic insertion of neurotransmitter receptor to postsynaptic membrane, hormone secretion, intracellular protein transport, protein transport, retrograde transport, endosome to Golgi, synaptic vesicle docking, synaptic vesicle priming		cellular response to interferon-gamma	Golgi to plasma membrane protein transport, SNARE complex assembly, exocytic insertion of neurotransmitter receptor to postsynaptic membrane, hormone secretion, intracellular protein transport, protein transport, retrograde transport, endosome to Golgi, synaptic vesicle docking, synaptic vesicle priming								cellular response to insulin stimulus, cellular response to interferon-gamma, response to glucose			trans-Golgi network	clathrin-coated vesicle, clathrin-coated vesicle membrane, cytosol, integral component of synaptic vesicle membrane, mitochondrial outer membrane, perinuclear region of cytoplasm, phagocytic vesicle, recycling endosome, secretory granule, specific granule membrane, storage vacuole, synaptic vesicle, synaptic vesicle membrane, synaptobrevin 2-SNAP-25-syntaxin-1a complex, synaptobrevin 2-SNAP-25-sy…			recycling endosome		clathrin-coated vesicle, clathrin-coated vesicle membrane, integral component of synaptic vesicle membrane, mitochondrial outer membrane, phagocytic vesicle, recycling endosome, secretory granule, specific granule membrane, storage vacuole, synaptic vesicle, synaptic vesicle membrane, tertiary granule membrane, trans-Golgi network, zymogen granule membrane	apical plasma membrane, clathrin-coated vesicle membrane, integral component of synaptic vesicle membrane, mitochondrial outer membrane, plasma membrane, specific granule membrane, synaptic vesicle membrane, synaptobrevin 2-SNAP-25-syntaxin-1a complex, synaptobrevin 2-SNAP-25-syntaxin-1a-complexin I complex, synaptobrevin 2-SNAP-25-syntaxin-1a-complexin II complex, tertiary granule membrane, zymo…	mitochondrial outer membrane		clathrin-coated vesicle membrane, integral component of synaptic vesicle membrane, mitochondrial outer membrane, specific granule membrane, synaptic vesicle membrane, tertiary granule membrane, zymogen granule membrane	clathrin-coated vesicle membrane, integral component of synaptic vesicle membrane, mitochondrial outer membrane, specific granule membrane, synaptic vesicle membrane, tertiary granule membrane, trans-Golgi network, zymogen granule membrane	apical plasma membrane				SNARE binding, calcium-dependent protein binding, calmodulin binding, identical protein binding, ion channel binding, macromolecular complex binding, myosin binding, phospholipid binding, protein C-terminus binding, syntaxin-1 binding								SNARE binding, calcium-dependent protein binding, calmodulin binding, identical protein binding, ion channel binding, macromolecular complex binding, myosin binding, phospholipid binding, protein C-terminus binding, syntaxin-1 binding
Cluster of Vimentin OS=Rattus norvegicus OX=10116 GN=Vim PE=1 SV=1 (G3V8C3_RAT)	G3V8C3_RAT [29]	54 kDa		extrinsic apoptotic signaling pathway, long-term synaptic potentiation, negative regulation of neuron projection development, positive regulation of Schwann cell proliferation, positive regulation of glial cell proliferation, regulation of chaperone-mediated autophagy, regulation of neurotransmitter uptake, tumor necrosis factor-mediated signaling pathway		Bergmann glial cell differentiation, astrocyte development, cell differentiation involved in embryonic placenta development, extracellular matrix organization, extrinsic apoptotic signaling pathway, hepatocyte apoptotic process, intermediate filament organization, negative regulation of neuron projection development, neuron projection regeneration, positive regulation of Schwann cell proliferatio…	Bergmann glial cell differentiation, astrocyte development, cell differentiation involved in embryonic placenta development, morphogenesis of an epithelium, negative regulation of neuron projection development, neuron projection regeneration, positive regulation of Schwann cell proliferation, positive regulation of glial cell proliferation, sarcomere organization							response to other organism	Bergmann glial cell differentiation, astrocyte development, cell differentiation involved in embryonic placenta development, negative regulation of neuron projection development, neuron projection regeneration, positive regulation of Schwann cell proliferation, positive regulation of glial cell proliferation		cell differentiation involved in embryonic placenta development	cell differentiation involved in embryonic placenta development	extrinsic apoptotic signaling pathway, neuron projection regeneration, response to hydrostatic pressure, response to other organism, response to wounding, tumor necrosis factor-mediated signaling pathway, wound healing				Z disc, costamere, cytoplasm, cytoplasmic side of lysosomal membrane	intermediate filament, keratin filament, type III intermediate filament				Z disc, costamere, cytoplasmic side of lysosomal membrane, intermediate filament, keratin filament, nuclear matrix, nucleoplasm, nucleus, type III intermediate filament	apicolateral plasma membrane, cytoplasmic side of lysosomal membrane, dystrophin-associated glycoprotein complex, sarcolemma		nuclear matrix, nucleoplasm	cytoplasmic side of lysosomal membrane	Z disc, costamere, cytoplasmic side of lysosomal membrane, intermediate filament, keratin filament, nuclear matrix, nucleoplasm, type III intermediate filament	apicolateral plasma membrane, dystrophin-associated glycoprotein complex, sarcolemma				integrin binding, kinase binding, macromolecular complex binding, protein heterodimerization activity, scaffold protein binding								integrin binding, kinase binding, macromolecular complex binding, protein heterodimerization activity, scaffold protein binding, structural constituent of cytoskeleton
Cluster of V-type proton ATPase subunit B, brain isoform OS=Rattus norvegicus OX=10116 GN=Atp6v1b2 PE=1 SV=1 (VATB2_RAT)	VATB2_RAT [2]	57 kDa		regulation of cellular pH, vacuolar acidification		ATP metabolic process, regulation of cellular pH, vacuolar acidification		hydrogen ion transmembrane transport			hydrogen ion transmembrane transport		ATP metabolic process										cytosol, melanosome					intracellular membrane-bounded organelle, melanosome	apical plasma membrane, integral component of membrane, plasma membrane, proton-transporting V-type ATPase, V1 domain					apical plasma membrane				ATP binding	hydrolase activity							ATP binding, hydrolase activity
Cluster of Y-box-binding protein 3 OS=Rattus norvegicus OX=10116 GN=Ybx3 PE=1 SV=1 (YBOX3_RAT)	YBOX3_RAT [7]	39 kDa		negative regulation of transcription from RNA polymerase II promoter			animal organ regeneration							spermatogenesis	animal organ regeneration, spermatogenesis		spermatogenesis	spermatogenesis					cytoplasm					nucleus			nucleus							single-stranded DNA binding								single-stranded DNA binding
Cluster of Zinc finger protein 385A OS=Rattus norvegicus OX=10116 GN=Zfp385a PE=1 SV=1 (A0A0G2K3Y0_RAT)	A0A0G2K3Y0_RAT [2]	38 kDa
Clusterin OS=Rattus norvegicus OX=10116 GN=Clu PE=1 SV=2	CLUS_RAT	51 kDa		intrinsic apoptotic signaling pathway, negative regulation of amyloid fibril formation, negative regulation of apoptotic process, negative regulation of beta-amyloid formation, negative regulation of intrinsic apoptotic signaling pathway in response to DNA damage, negative regulation of protein homooligomerization, positive regulation of NF-kappaB transcription factor activity, positive regulatio…		cell morphogenesis, cellular response to growth factor stimulus, central nervous system myelin maintenance, chaperone-mediated protein complex assembly, chaperone-mediated protein folding, intrinsic apoptotic signaling pathway, microglial cell activation, microglial cell proliferation, neuron projection morphogenesis	aging, cell morphogenesis, central nervous system myelin maintenance, endocrine pancreas development, microglial cell proliferation, neuron projection morphogenesis	protein import		immune complex clearance, microglial cell activation	protein import			spermatogenesis	central nervous system myelin maintenance, endocrine pancreas development, estrous cycle, microglial cell proliferation, neuron projection morphogenesis, spermatogenesis		estrous cycle, spermatogenesis	estrous cycle, spermatogenesis	cellular response to growth factor stimulus, intrinsic apoptotic signaling pathway, response to light stimulus, response to misfolded protein, response to potassium ion, response to wounding	estrous cycle			chromaffin granule, cytosol, mitochondrial inner membrane, mitochondrion, perinuclear endoplasmic reticulum lumen, perinuclear region of cytoplasm		perinuclear endoplasmic reticulum lumen		extracellular space, spherical high-density lipoprotein particle	chromaffin granule, mitochondrial inner membrane, mitochondrion, nucleus, perinuclear endoplasmic reticulum lumen	mitochondrial inner membrane	mitochondrial inner membrane	nucleus	mitochondrial inner membrane	mitochondrial inner membrane, perinuclear endoplasmic reticulum lumen					misfolded protein binding, protein N-terminus binding, ubiquitin protein ligase binding, unfolded protein binding								misfolded protein binding, protein N-terminus binding, ubiquitin protein ligase binding, unfolded protein binding
Coactosin-like protein OS=Rattus norvegicus OX=10116 GN=Cotl1 PE=1 SV=1	COTL1_RAT	16 kDa		regulation of actin filament polymerization		regulation of actin filament polymerization								defense response to fungus					defense response to fungus				cortical actin cytoskeleton	cortical actin cytoskeleton				cortical actin cytoskeleton, nucleus	plasma membrane		nucleus		cortical actin cytoskeleton	plasma membrane				actin filament binding, enzyme binding								actin filament binding, enzyme binding
Coatomer protein complex, subunit zeta 1 OS=Rattus norvegicus OX=10116 GN=Copz1 PE=1 SV=1	D4A8T3_RAT	20 kDa
Coatomer subunit beta' OS=Rattus norvegicus OX=10116 GN=Copb2 PE=1 SV=3	COPB2_RAT	103 kDa						ER to Golgi vesicle-mediated transport, intra-Golgi vesicle-mediated transport, intracellular protein transport, retrograde vesicle-mediated transport, Golgi to ER			ER to Golgi vesicle-mediated transport, intra-Golgi vesicle-mediated transport, intracellular protein transport, retrograde vesicle-mediated transport, Golgi to ER											COPI vesicle coat, Golgi apparatus, Golgi membrane	COPI vesicle coat, Golgi apparatus, Golgi membrane, cytosol					COPI vesicle coat, Golgi apparatus, Golgi membrane	COPI vesicle coat, Golgi membrane			COPI vesicle coat, Golgi membrane	COPI vesicle coat, Golgi membrane					protein kinase C binding								protein kinase C binding, structural molecule activity
Coatomer subunit delta OS=Rattus norvegicus OX=10116 GN=Arcn1 PE=2 SV=1	COPD_RAT	57 kDa					cerebellar Purkinje cell layer maturation	ER to Golgi vesicle-mediated transport, protein transport, retrograde vesicle-mediated transport, Golgi to ER			ER to Golgi vesicle-mediated transport, Golgi localization, protein transport, retrograde vesicle-mediated transport, Golgi to ER				adult locomotory behavior, cerebellar Purkinje cell layer maturation	pigmentation						COPI vesicle coat, COPI-coated vesicle, Golgi membrane	COPI vesicle coat, COPI-coated vesicle, Golgi membrane, cytosol, endoplasmic reticulum		endoplasmic reticulum			COPI vesicle coat, COPI-coated vesicle, Golgi membrane, endoplasmic reticulum	COPI vesicle coat, Golgi membrane			COPI vesicle coat, Golgi membrane	COPI vesicle coat, COPI-coated vesicle, Golgi membrane
Coatomer subunit gamma OS=Rattus norvegicus OX=10116 GN=Copg2 PE=1 SV=1	A0A0H2UHV9_RAT	98 kDa
Cocaine- and amphetamine-regulated transcript protein OS=Rattus norvegicus OX=10116 GN=Cartpt PE=1 SV=1	CART_RAT	14 kDa		G-protein coupled receptor signaling pathway, activation of MAPKK activity, cellular glucose homeostasis, circadian regulation of gene expression, negative regulation of appetite, negative regulation of bone resorption, negative regulation of glucagon secretion, neuropeptide signaling pathway, positive regulation of blood pressure, positive regulation of epinephrine secretion, positive regulation…		G-protein coupled receptor signaling pathway, cellular glucose homeostasis, cellular response to starvation, chemical synaptic transmission, neuropeptide signaling pathway, somatostatin secretion		gastric acid secretion, somatostatin secretion			gastric acid secretion, somatostatin secretion				adult feeding behavior, circadian regulation of gene expression, gastric acid secretion, positive regulation of blood pressure				G-protein coupled receptor signaling pathway, cellular response to starvation, negative regulation of appetite, neuropeptide signaling pathway	circadian regulation of gene expression			secretory granule				extracellular space	secretory granule										neuropeptide hormone activity								neuropeptide hormone activity
Cofilin 2 OS=Rattus norvegicus OX=10116 GN=Cfl2 PE=1 SV=1	M0RC65_RAT	19 kDa
Cofilin-1 OS=Rattus norvegicus OX=10116 GN=Cfl1 PE=1 SV=3	COF1_RAT	19 kDa		negative regulation of actin filament bundle assembly, negative regulation of actin filament depolymerization, negative regulation of cell adhesion, negative regulation of cell motility, negative regulation of cell size, negative regulation of dendritic spine maintenance, negative regulation of lamellipodium assembly, negative regulation of postsynaptic density organization, negative regulation o…		actin filament fragmentation, cell projection organization, cellular response to epidermal growth factor stimulus, cellular response to ether, cellular response to hydrogen peroxide, cellular response to insulin-like growth factor stimulus, cellular response to interleukin-1, cellular response to interleukin-6, cellular response to tumor necrosis factor, cytoskeleton organization, establishment o…	hippocampus development, neural crest cell migration, neural fold formation, positive regulation of dendritic spine development, regulation of dendritic spine morphogenesis	protein import into nucleus			neural crest cell migration, protein import into nucleus	neural crest cell migration	protein phosphorylation		hippocampus development, neural crest cell migration, neural fold formation, positive regulation of dendritic spine development, regulation of dendritic spine morphogenesis				cellular response to epidermal growth factor stimulus, cellular response to ether, cellular response to hydrogen peroxide, cellular response to insulin-like growth factor stimulus, cellular response to interleukin-1, cellular response to interleukin-6, cellular response to tumor necrosis factor, response to activity, response to amino acid, response to organic cyclic compound				cortical actin cytoskeleton, cytoplasm, mitochondrial membrane	cofilin-actin rod, cortical actin cytoskeleton				cofilin-actin rod, cortical actin cytoskeleton, mitochondrial membrane, nuclear matrix	lamellipodium membrane, mitochondrial membrane, ruffle membrane, synaptic membrane	mitochondrial membrane	nuclear matrix	mitochondrial membrane	cofilin-actin rod, cortical actin cytoskeleton, mitochondrial membrane, nuclear matrix	lamellipodium membrane, ruffle membrane, synaptic membrane				actin binding, actin filament binding, phosphatidylinositol bisphosphate binding, protein phosphatase binding, receptor binding								actin binding, actin filament binding, phosphatidylinositol bisphosphate binding, protein phosphatase binding, receptor binding
Cold-inducible RNA-binding protein OS=Rattus norvegicus OX=10116 GN=Cirbp PE=2 SV=1	CIRBP_RAT	19 kDa		mRNA stabilization, negative regulation of cell growth, positive regulation of mRNA splicing, via spliceosome, positive regulation of translation, regulation of cell cycle G1/S phase transition		cellular response to cold, stress granule assembly													cellular response to cold, response to UV				cytoplasm, cytoplasmic stress granule					cytoplasmic stress granule, nucleolus, nucleoplasm, nucleus, spliceosomal complex			nucleolus, nucleoplasm, spliceosomal complex		nucleolus, nucleoplasm, spliceosomal complex					mRNA 3'-UTR binding, poly(U) RNA binding, small ribosomal subunit rRNA binding								mRNA 3'-UTR binding, poly(U) RNA binding, small ribosomal subunit rRNA binding, translation repressor activity
Collagen alpha-1(I) chain OS=Rattus norvegicus OX=10116 GN=Col1a1 PE=1 SV=5	CO1A1_RAT-DECOY	?
Collagen type XVIII alpha 1 chain OS=Rattus norvegicus OX=10116 GN=Col18a1 PE=1 SV=2	F1LR02_RAT	135 kDa
Complexin 3 OS=Rattus norvegicus OX=10116 GN=Cplx3 PE=1 SV=1	D4ABY0_RAT	18 kDa
Complexin 4 OS=Rattus norvegicus OX=10116 GN=Cplx4 PE=4 SV=1	D3ZM85_RAT	18 kDa
Complexin-1 OS=Rattus norvegicus OX=10116 GN=Cplx1 PE=1 SV=1	CPLX1_RAT	15 kDa		exocytic insertion of neurotransmitter receptor to postsynaptic membrane, insulin secretion, regulation of neurotransmitter secretion, regulation of synaptic vesicle fusion to presynaptic membrane, synaptic vesicle exocytosis		exocytic insertion of neurotransmitter receptor to postsynaptic membrane, insulin secretion, synaptic vesicle exocytosis		exocytic insertion of neurotransmitter receptor to postsynaptic membrane, insulin secretion, synaptic vesicle exocytosis			exocytic insertion of neurotransmitter receptor to postsynaptic membrane, insulin secretion, synaptic vesicle exocytosis												SNARE complex, cytosol, synaptobrevin 2-SNAP-25-syntaxin-1a-complexin I complex						SNARE complex, synaptobrevin 2-SNAP-25-syntaxin-1a-complexin I complex									syntaxin-1 binding								neurotransmitter transporter activity, syntaxin-1 binding
Complexin-2 OS=Rattus norvegicus OX=10116 GN=Cplx2 PE=1 SV=1	CPLX2_RAT	15 kDa		positive regulation of synaptic plasticity, regulation of neurotransmitter secretion, regulation of synaptic vesicle fusion to presynaptic membrane, synaptic vesicle exocytosis		mast cell degranulation, synaptic vesicle exocytosis, vesicle docking involved in exocytosis		mast cell degranulation, synaptic vesicle exocytosis, vesicle docking involved in exocytosis		mast cell degranulation	mast cell degranulation, synaptic vesicle exocytosis, vesicle docking involved in exocytosis								mast cell degranulation				SNARE complex, cytosol, mast cell granule, synaptobrevin 2-SNAP-25-syntaxin-1a-complexin II complex					mast cell granule, nucleus	SNARE complex, synaptobrevin 2-SNAP-25-syntaxin-1a-complexin II complex		nucleus							calcium-dependent protein binding, syntaxin-1 binding								calcium-dependent protein binding, syntaxin-1 binding
COP9 (Constitutive photomorphogenic) homolog, subunit 6 (Arabidopsis thaliana) (Predicted), isoform CRA_a OS=Rattus norvegicus OX=10116 GN=Cops6 PE=1 SV=1	D3ZI16_RAT	38 kDa
COP9 signalosome complex subunit 2 OS=Rattus norvegicus OX=10116 GN=Cops2 PE=1 SV=1	CSN2_RAT	52 kDa		negative regulation of nucleic acid-templated transcription, negative regulation of transcription from RNA polymerase II promoter, negative regulation of transcription, DNA-templated		neuron differentiation, protein deneddylation, protein phosphorylation, skeletal muscle cell differentiation	inner cell mass cell proliferation, neuron differentiation, skeletal muscle cell differentiation		inner cell mass cell proliferation				protein deneddylation, protein phosphorylation		inner cell mass cell proliferation, neuron differentiation, skeletal muscle cell differentiation								cytoplasm					COP9 signalosome, nucleus			COP9 signalosome		COP9 signalosome													transcription corepressor activity
COP9 signalosome complex subunit 3 OS=Rattus norvegicus OX=10116 GN=Cops3 PE=1 SV=1	CSN3_RAT	48 kDa				protein deneddylation, ubiquitin-dependent protein catabolic process	in utero embryonic development						protein deneddylation, ubiquitin-dependent protein catabolic process		in utero embryonic development								cytosol					COP9 signalosome, nucleoplasm			COP9 signalosome, nucleoplasm		COP9 signalosome, nucleoplasm
COP9 signalosome complex subunit 4 OS=Rattus norvegicus OX=10116 GN=Cops4 PE=1 SV=1	CSN4_RAT	46 kDa				protein deneddylation							protein deneddylation										cytosol, synaptic vesicle					COP9 signalosome, synaptic vesicle			COP9 signalosome		COP9 signalosome
COP9 signalosome complex subunit 8 OS=Rattus norvegicus OX=10116 GN=Cops8 PE=2 SV=1	CSN8_RAT	23 kDa		activation of NF-kappaB-inducing kinase activity, negative regulation of cell proliferation		COP9 signalosome assembly, activation of NF-kappaB-inducing kinase activity, protein deneddylation, protein phosphorylation							protein deneddylation, protein phosphorylation						activation of NF-kappaB-inducing kinase activity				cytosol, perinuclear region of cytoplasm					COP9 signalosome, nucleoplasm			COP9 signalosome, nucleoplasm		COP9 signalosome, nucleoplasm
Copper transport protein ATOX1 OS=Rattus norvegicus OX=10116 GN=Atox1 PE=1 SV=1	ATOX1_RAT	7 kDa		cellular copper ion homeostasis, negative regulation of apoptotic process		cellular copper ion homeostasis		copper ion export			copper ion export								response to oxidative stress				cytosol															ATPase binding, copper chaperone activity, copper-dependent protein binding							copper chaperone activity	ATPase binding, copper chaperone activity, copper-dependent protein binding
Coronin OS=Rattus norvegicus OX=10116 GN=Coro1b PE=1 SV=1	G3V940_RAT	54 kDa
Coronin-7 OS=Rattus norvegicus OX=10116 GN=Coro7 PE=1 SV=2	CORO7_RAT	101 kDa				actin filament organization, actin filament polymerization		Golgi to endosome transport, protein transport			Golgi to endosome transport, protein transport											Golgi membrane, trans-Golgi network	Golgi apparatus, Golgi membrane, cytoplasmic vesicle, cytosol, trans-Golgi network					Golgi apparatus, Golgi membrane, cytoplasmic vesicle, trans-Golgi network	Golgi membrane, integral component of membrane			Golgi membrane	Golgi membrane, trans-Golgi network					actin binding, actin filament binding								actin binding, actin filament binding
Craniofacial development protein 1 OS=Rattus norvegicus OX=10116 GN=Cfdp1 PE=1 SV=1	A0A0G2K6H5_RAT	31 kDa
C-reactive protein OS=Rattus norvegicus OX=10116 GN=Crp PE=1 SV=1	A0A0G2K8V5_RAT	117 kDa
Creatine kinase M-type OS=Rattus norvegicus OX=10116 GN=Ckm PE=1 SV=1	A0A0G2JSP8_RAT (+1)	43 kDa
CUGBP Elav-like family member 1 OS=Rattus norvegicus OX=10116 GN=Celf1 PE=2 SV=1	CELF1_RAT	52 kDa		positive regulation of multicellular organism growth, regulation of RNA splicing, regulation of alternative mRNA splicing, via spliceosome		mRNA splice site selection, spermatid development	spermatid development						mRNA splice site selection	spermatid development	spermatid development		spermatid development	spermatid development					cytoplasm					nucleoplasm, nucleus			nucleoplasm, nucleus		nucleoplasm					mRNA binding, translation initiation factor binding								mRNA binding, translation initiation factor binding
CUGBP Elav-like family member 2 OS=Rattus norvegicus OX=10116 GN=Celf2 PE=1 SV=2	Z4YNP1_RAT	55 kDa
Cullin-associated NEDD8-dissociated protein 1 OS=Rattus norvegicus OX=10116 GN=Cand1 PE=1 SV=1	CAND1_RAT	136 kDa		negative regulation of catalytic activity, positive regulation of RNA polymerase II transcriptional preinitiation complex assembly, positive regulation of transcription, DNA-templated		SCF complex assembly, cell differentiation, protein ubiquitination	cell differentiation						protein ubiquitination									Golgi apparatus	Golgi apparatus, cytosol					Golgi apparatus, nucleoplasm, nucleus			nucleoplasm, nucleus		nucleoplasm					TBP-class protein binding								TBP-class protein binding
Cyclin dependent kinase inhibitor OS=Rattus norvegicus OX=10116 GN=Cdkn1b PE=1 SV=1	O08769_RAT	22 kDa
Cystatin-B OS=Rattus norvegicus OX=10116 GN=Cstb PE=1 SV=1	CYTB_RAT	11 kDa													adult locomotory behavior								cytosol				extracellular space	nucleolus			nucleolus		nucleolus					protease binding						cysteine-type endopeptidase inhibitor activity		cysteine-type endopeptidase inhibitor activity, protease binding
Cystatin-C OS=Rattus norvegicus OX=10116 GN=Cst3 PE=1 SV=2	CYTC_RAT	15 kDa		negative regulation of cell death, positive regulation of DNA replication, positive regulation of cell proliferation, regulation of programmed cell death		Sertoli cell development, apoptotic process, cell activation, cellular response to hydrogen peroxide	Sertoli cell development, brain development, embryo implantation, eye development, male gonad development, salivary gland development							embryo implantation	Sertoli cell development, brain development, circadian sleep/wake cycle, REM sleep, embryo implantation, eye development, male gonad development, salivary gland development		Sertoli cell development, embryo implantation, male gonad development	Sertoli cell development, embryo implantation, male gonad development	cellular response to hydrogen peroxide, cellular response to oxidative stress, response to axon injury, response to carbohydrate, response to drug, response to estradiol, response to hypoxia, response to inorganic substance, response to nutrient levels, response to toxic substance	circadian sleep/wake cycle, REM sleep			contractile fiber, endoplasmic reticulum, lysosome, multivesicular body, perinuclear region of cytoplasm		endoplasmic reticulum	multivesicular body	basement membrane, extracellular space	contractile fiber, endoplasmic reticulum, lysosome, multivesicular body, nuclear membrane	nuclear membrane		nuclear membrane	nuclear membrane	nuclear membrane					protease binding						cysteine-type endopeptidase inhibitor activity, peptidase inhibitor activity		cysteine-type endopeptidase inhibitor activity, peptidase inhibitor activity, protease binding
Cysteine and glycine-rich protein 1 OS=Rattus norvegicus OX=10116 GN=Csrp1 PE=1 SV=2	CSRP1_RAT	21 kDa				actin cytoskeleton organization, sarcomere organization	muscle tissue development, nervous system development, sarcomere organization								nervous system development								Z disc, cytoplasm					Z disc, nucleus			nucleus		Z disc					actinin binding, metal ion binding								actinin binding, metal ion binding, structural constituent of muscle
Cysteine conjugate-beta lyase 1, isoform CRA_a OS=Rattus norvegicus OX=10116 GN=Kyat1 PE=1 SV=1	G3V827_RAT (+1)	52 kDa
Cytidine/uridine monophosphate kinase 2 OS=Rattus norvegicus OX=10116 GN=Cmpk2 PE=1 SV=3	D3ZC63_RAT	50 kDa
Cytochrome b-c1 complex subunit 1, mitochondrial OS=Rattus norvegicus OX=10116 GN=Uqcrc1 PE=1 SV=1	QCR1_RAT	53 kDa				mitochondrial electron transport, ubiquinol to cytochrome c							mitochondrial electron transport, ubiquinol to cytochrome c						response to activity, response to alkaloid				cytosol, mitochondrial inner membrane, mitochondrial respiratory chain complex III, mitochondrion					mitochondrial inner membrane, mitochondrial respiratory chain complex III, mitochondrion	mitochondrial inner membrane, mitochondrial respiratory chain complex III	mitochondrial inner membrane, mitochondrial respiratory chain complex III		mitochondrial inner membrane, mitochondrial respiratory chain complex III	mitochondrial inner membrane, mitochondrial respiratory chain complex III					macromolecular complex binding, metal ion binding, ubiquitin protein ligase binding	catalytic activity							catalytic activity, macromolecular complex binding, metal ion binding, ubiquitin protein ligase binding
Cytochrome b-c1 complex subunit 2, mitochondrial OS=Rattus norvegicus OX=10116 GN=Uqcrc2 PE=1 SV=2	QCR2_RAT	48 kDa				protein processing involved in protein targeting to mitochondrion		protein processing involved in protein targeting to mitochondrion			protein processing involved in protein targeting to mitochondrion		oxidation-reduction process, protein processing involved in protein targeting to mitochondrion						response to drug				mitochondrial inner membrane, mitochondrial processing peptidase complex, mitochondrial respiratory chain complex III, mitochondrial respiratory chain complex IV, mitochondrion					mitochondrial inner membrane, mitochondrial processing peptidase complex, mitochondrial respiratory chain complex III, mitochondrial respiratory chain complex IV, mitochondrion, nucleoplasm	mitochondrial inner membrane, mitochondrial respiratory chain complex III, mitochondrial respiratory chain complex IV	mitochondrial inner membrane, mitochondrial processing peptidase complex, mitochondrial respiratory chain complex III, mitochondrial respiratory chain complex IV	nucleoplasm	mitochondrial inner membrane, mitochondrial respiratory chain complex III, mitochondrial respiratory chain complex IV	mitochondrial inner membrane, mitochondrial processing peptidase complex, mitochondrial respiratory chain complex III, mitochondrial respiratory chain complex IV, nucleoplasm					macromolecular complex binding, metal ion binding	metalloendopeptidase activity							macromolecular complex binding, metal ion binding, metalloendopeptidase activity
Cytochrome b-c1 complex subunit 6, mitochondrial OS=Rattus norvegicus OX=10116 GN=Uqcrh PE=3 SV=1	QCR6_RAT	10 kDa				aerobic respiration, mitochondrial electron transport, ubiquinol to cytochrome c, protein heterooligomerization							aerobic respiration, mitochondrial electron transport, ubiquinol to cytochrome c										mitochondrial respiratory chain complex III					mitochondrial respiratory chain complex III	mitochondrial respiratory chain complex III	mitochondrial respiratory chain complex III		mitochondrial respiratory chain complex III	mitochondrial respiratory chain complex III					macromolecular complex binding	ubiquinol-cytochrome-c reductase activity							macromolecular complex binding, ubiquinol-cytochrome-c reductase activity
Cytochrome b-c1 complex subunit 7 OS=Rattus norvegicus OX=10116 GN=Uqcrb PE=1 SV=1	B2RYS2_RAT	14 kDa
Cytochrome b-c1 complex subunit Rieske, mitochondrial OS=Rattus norvegicus OX=10116 GN=Uqcrfs1 PE=1 SV=2	UCRI_RAT	29 kDa																	response to antibiotic, response to drug, response to hormone				mitochondrial membrane, mitochondrial respiratory chain complex III, mitochondrion					mitochondrial membrane, mitochondrial respiratory chain complex III, mitochondrion	integral component of membrane, mitochondrial membrane, mitochondrial respiratory chain complex III, plasma membrane, respiratory chain complex III	mitochondrial membrane, mitochondrial respiratory chain complex III		mitochondrial respiratory chain complex III	mitochondrial membrane, mitochondrial respiratory chain complex III	plasma membrane				2 iron, 2 sulfur cluster binding, macromolecular complex binding, metal ion binding	ubiquinol-cytochrome-c reductase activity							2 iron, 2 sulfur cluster binding, macromolecular complex binding, metal ion binding, ubiquinol-cytochrome-c reductase activity
Cytochrome c oxidase assembly factor 6 OS=Rattus norvegicus OX=10116 GN=Coa6 PE=1 SV=1	A0A0G2JUM8_RAT	9 kDa
Cytochrome c oxidase subunit 5A, mitochondrial OS=Rattus norvegicus OX=10116 GN=Cox5a PE=1 SV=1	COX5A_RAT	16 kDa				mitochondrial electron transport, cytochrome c to oxygen							mitochondrial electron transport, cytochrome c to oxygen										mitochondrial respiratory chain complex IV					mitochondrial respiratory chain complex IV	mitochondrial respiratory chain complex IV	mitochondrial respiratory chain complex IV		mitochondrial respiratory chain complex IV	mitochondrial respiratory chain complex IV					metal ion binding	cytochrome-c oxidase activity				cytochrome-c oxidase activity			cytochrome-c oxidase activity, metal ion binding
Cytochrome c oxidase subunit 5B, mitochondrial OS=Rattus norvegicus OX=10116 GN=Cox5b PE=1 SV=2	COX5B_RAT	14 kDa				mitochondrial ATP synthesis coupled proton transport, mitochondrial electron transport, cytochrome c to oxygen		mitochondrial ATP synthesis coupled proton transport			mitochondrial ATP synthesis coupled proton transport		mitochondrial ATP synthesis coupled proton transport, mitochondrial electron transport, cytochrome c to oxygen						response to peptide hormone				mitochondrial inner membrane					mitochondrial inner membrane	mitochondrial inner membrane	mitochondrial inner membrane		mitochondrial inner membrane	mitochondrial inner membrane					metal ion binding	cytochrome-c oxidase activity				cytochrome-c oxidase activity			cytochrome-c oxidase activity, metal ion binding
Cytochrome c oxidase subunit 6A1, mitochondrial OS=Rattus norvegicus OX=10116 GN=Cox6a1 PE=1 SV=2	CX6A1_RAT	12 kDa				aerobic respiration, mitochondrial electron transport, cytochrome c to oxygen							aerobic respiration, mitochondrial electron transport, cytochrome c to oxygen										mitochondrial respiratory chain complex IV					mitochondrial respiratory chain complex IV	mitochondrial respiratory chain complex IV	mitochondrial respiratory chain complex IV		mitochondrial respiratory chain complex IV	mitochondrial respiratory chain complex IV						cytochrome-c oxidase activity				cytochrome-c oxidase activity	enzyme regulator activity		cytochrome-c oxidase activity, enzyme regulator activity
Cytochrome c oxidase subunit 7A2, mitochondrial OS=Rattus norvegicus OX=10116 GN=Cox7a2 PE=1 SV=1	CX7A2_RAT	9 kDa		regulation of oxidative phosphorylation		mitochondrial respiratory chain supercomplex assembly																	mitochondrial respiratory chain					mitochondrial respiratory chain	mitochondrial respiratory chain	mitochondrial respiratory chain		mitochondrial respiratory chain	mitochondrial respiratory chain						cytochrome-c oxidase activity				cytochrome-c oxidase activity			cytochrome-c oxidase activity
Cytochrome c oxidase subunit OS=Rattus norvegicus OX=10116 GN=Cox6b1 PE=1 SV=1	D3ZD09_RAT	10 kDa
Cytochrome c, somatic OS=Rattus norvegicus OX=10116 GN=Cycs PE=1 SV=2	CYC_RAT (+1)	12 kDa		negative regulation of hydrogen peroxide biosynthetic process, positive regulation of cellular respiration		apoptotic process, glial cell apoptotic process, mitochondrial electron transport, cytochrome c to oxygen, mitochondrial electron transport, ubiquinol to cytochrome c							mitochondrial electron transport, cytochrome c to oxygen, mitochondrial electron transport, ubiquinol to cytochrome c						response to carbon monoxide, response to copper ion, response to gravity, response to ischemia, response to oxidative stress				cytosol, mitochondrial intermembrane space, mitochondrion					mitochondrial intermembrane space, mitochondrion	respiratory chain	mitochondrial intermembrane space			mitochondrial intermembrane space					enzyme binding, heme binding, metal ion binding					electron carrier activity			electron carrier activity, enzyme binding, heme binding, metal ion binding
Cytoglobin OS=Rattus norvegicus OX=10116 GN=Cygb PE=1 SV=1	CYGB_RAT	21 kDa		negative regulation of collagen biosynthetic process, negative regulation of fibroblast migration, negative regulation of hepatic stellate cell activation		fatty acid oxidation							fatty acid oxidation						response to hypoxia, response to oxidative stress				cytoplasm					nuclear speck			nuclear speck		nuclear speck			catalase activity, fatty acid peroxidase activity		heme binding, iron ion binding, oxygen binding	catalase activity, fatty acid peroxidase activity							catalase activity, fatty acid peroxidase activity, heme binding, iron ion binding, oxygen binding, oxygen transporter activity
Cytoplasmic aconitate hydratase OS=Rattus norvegicus OX=10116 GN=Aco1 PE=1 SV=1	G3V6S2_RAT	98 kDa
Cytoplasmic dynein 1 heavy chain 1 OS=Rattus norvegicus OX=10116 GN=Dync1h1 PE=1 SV=2	M0R9X8_RAT	532 kDa
Cytoplasmic dynein 1 intermediate chain 1 OS=Rattus norvegicus OX=10116 GN=Dync1i1 PE=1 SV=3	G3V792_RAT	73 kDa
Cytoplasmic dynein 1 light intermediate chain 1 OS=Rattus norvegicus OX=10116 GN=Dync1li1 PE=1 SV=1	DC1L1_RAT	57 kDa		positive regulation of mitotic cell cycle spindle assembly checkpoint, regulation of centrosome cycle		cell division, cellular response to nerve growth factor stimulus, microtubule-based movement, mitotic spindle organization, protein homooligomerization													cellular response to nerve growth factor stimulus				cytoplasm	centrosome, cytoplasmic dynein complex, microtubule, spindle pole				centrosome, condensed chromosome kinetochore, cytoplasmic dynein complex, kinetochore, microtubule, spindle pole					centrosome, condensed chromosome kinetochore, cytoplasmic dynein complex, kinetochore, microtubule, spindle pole					ATP binding, dynein heavy chain binding	microtubule motor activity							ATP binding, dynein heavy chain binding, microtubule motor activity		microtubule motor activity
Cytoplasmic dynein 1 light intermediate chain 2 OS=Rattus norvegicus OX=10116 GN=Dync1li2 PE=1 SV=1	DC1L2_RAT	55 kDa				cellular response to nerve growth factor stimulus, microtubule cytoskeleton organization, microtubule-based movement, protein homooligomerization					centrosome localization								cellular response to nerve growth factor stimulus				cytoplasm	centrosome, cytoplasmic dynein complex, microtubule				centrosome, cytoplasmic dynein complex, kinetochore, microtubule					centrosome, cytoplasmic dynein complex, kinetochore, microtubule					ATP binding, dynein heavy chain binding	microtubule motor activity							ATP binding, dynein heavy chain binding, microtubule motor activity		microtubule motor activity
Cytosol aminopeptidase OS=Rattus norvegicus OX=10116 GN=Lap3 PE=1 SV=1	AMPL_RAT	56 kDa																				trans-Golgi network	cytosol, trans-Golgi network					nucleoplasm, trans-Golgi network			nucleoplasm		nucleoplasm, trans-Golgi network					manganese ion binding	aminopeptidase activity, metalloexopeptidase activity							aminopeptidase activity, manganese ion binding, metalloexopeptidase activity
Cytosolic acyl coenzyme A thioester hydrolase OS=Rattus norvegicus OX=10116 GN=Acot7 PE=1 SV=4	BACH_RAT (+1)	43 kDa				coenzyme A biosynthetic process, long-chain fatty-acyl-CoA catabolic process, medium-chain fatty acid biosynthetic process, medium-chain fatty-acyl-CoA catabolic process, palmitic acid biosynthetic process							coenzyme A biosynthetic process, long-chain fatty-acyl-CoA catabolic process, medium-chain fatty acid biosynthetic process, medium-chain fatty-acyl-CoA catabolic process, palmitic acid biosynthetic process										cytosol					nucleoplasm			nucleoplasm		nucleoplasm					long-chain fatty acyl-CoA binding, protein homodimerization activity	carboxylic ester hydrolase activity, myristoyl-CoA hydrolase activity, palmitoyl-CoA hydrolase activity							carboxylic ester hydrolase activity, long-chain fatty acyl-CoA binding, myristoyl-CoA hydrolase activity, palmitoyl-CoA hydrolase activity, protein homodimerization activity
Cytosolic non-specific dipeptidase OS=Rattus norvegicus OX=10116 GN=Cndp2 PE=1 SV=1	CNDP2_RAT	53 kDa																					cytosol					nucleoplasm			nucleoplasm		nucleoplasm					metal ion binding	alanylglutamate dipeptidase activity, carboxypeptidase activity, cytosolic dipeptidase activity, metallopeptidase activity							alanylglutamate dipeptidase activity, carboxypeptidase activity, cytosolic dipeptidase activity, metal ion binding, metallopeptidase activity
D-3-phosphoglycerate dehydrogenase OS=Rattus norvegicus OX=10116 GN=Phgdh PE=1 SV=3	SERA_RAT	56 kDa		regulation of gene expression		G1 to G0 transition, L-serine biosynthetic process, gamma-aminobutyric acid metabolic process, glial cell development, glutamine metabolic process, glycine metabolic process, neuron projection development, serine family amino acid biosynthetic process, taurine metabolic process, threonine metabolic process	glial cell development, neural tube development, neuron projection development, spinal cord development						L-serine biosynthetic process, gamma-aminobutyric acid metabolic process, glutamine metabolic process, glycine metabolic process, serine family amino acid biosynthetic process, taurine metabolic process, threonine metabolic process		glial cell development, neural tube development, neuron projection development, spinal cord development																							NAD binding	phosphoglycerate dehydrogenase activity							NAD binding, phosphoglycerate dehydrogenase activity
D-aminoacyl-tRNA deacylase OS=Rattus norvegicus OX=10116 GN=Dtd1 PE=1 SV=1	B0K014_RAT	23 kDa
DAZ associated protein 1, isoform CRA_a OS=Rattus norvegicus OX=10116 GN=Dazap1 PE=1 SV=1	Q4KLZ3_RAT	43 kDa
DEAD (Asp-Glu-Ala-Asp) box polypeptide 5 OS=Rattus norvegicus OX=10116 GN=Ddx5 PE=1 SV=1	Q6AYI1_RAT	69 kDa
Dead end homolog 1 (Zebrafish) OS=Rattus norvegicus OX=10116 GN=Hars PE=1 SV=1	Q4QQV4_RAT	57 kDa
DEAD-box helicase 6 OS=Rattus norvegicus OX=10116 GN=Ddx6 PE=1 SV=1	D3ZD73_RAT	54 kDa
DEAH (Asp-Glu-Ala-His) box polypeptide 15 (Predicted), isoform CRA_b OS=Rattus norvegicus OX=10116 GN=Dhx15 PE=1 SV=1	D3ZD97_RAT	91 kDa
DEAH (Asp-Glu-Ala-His) box polypeptide 9 (Predicted) OS=Rattus norvegicus OX=10116 GN=Dhx9 PE=1 SV=1	D4A9D6_RAT	132 kDa
Decapping enzyme, scavenger OS=Rattus norvegicus OX=10116 GN=Dcps PE=1 SV=1	Q3B8P4_RAT	39 kDa
Delta-1-pyrroline-5-carboxylate dehydrogenase, mitochondrial OS=Rattus norvegicus OX=10116 GN=Aldh4a1 PE=3 SV=1	A0A0G2JUT5_RAT	164 kDa
[truncated: 1,411 more rows]
[truncated: 5 more columns]
