# Supplementary material for: 17β-Estradiol Delivered in Eye Drops: Evidence of Impact on Protein Networks and Associated Biological Processes in the Rat Retina through Quantitative Proteomics
Source: Pharmaceutics. 2020 Jan 27;12(2):101. doi: 10.3390/pharmaceutics12020101 (PMC7076522; doi:10.3390/pharmaceutics12020101)
Supplement: Supplementary file 1 [file pharmaceutics-12-00101-s001.zip › pharmaceutics-685990_TableS2.xlsx]

## Sheet: Sheet0
Table S2. A list of identified E2-regulated retinal proteins in OVX rats.*
*Meeting the criterion of statistically significant differences (t-test, P<0.05) and at least twofold change in normalized spectral counts¨ between the E2-treated (eye drops) versus the untreated control group. Red background: Upregulation; Green background: Downregulation. ¨For proteins solubilized from a complex cellular proteome by an 8 M aqueous urea solution, linear relationships of normaliz…
Entrez Gene Name	UniProt/Swiss-Prot Accession	Fold Change in Normalized Spectral Counts	P-value of Change in Normalized Spectral Count
crystallin beta B1	CRBB1_RAT	17	0.024
argininosuccinate synthase 1	ASSY_RAT	16	0.034
guanylate cyclase 2F, retinal	GUC2F_RAT	13	0.0042
serine/arginine repetitive matrix 2	A0A0G2K2M9_RAT	13	0.0002
talin 2	D3ZE09_RAT	13	0.00022
ATP-binding cassette, sub-family A (ABC1), member 8a	D3ZCF8_RAT	12	0.0029
crystallin gamma B	F1LP53_RAT	12	0.037
retinal outer segment membrane protein 1	ROM1_RAT	11	0.00017
calnexin	CALX_RAT	10	0.0086
crystallin alpha A	CRYAA_RAT	10	0.049
crystallin gamma S	CRYGS_RAT	10	0.046
reticulon 4	F1LQN3_RAT	10	0.00049
crystallin beta A4	CRBA4_RAT	9.7	0.025
dynactin subunit 1	D4A8U7_RAT	9.5	0.0018
gephyrin	GEPH_RAT	8.9	0.00017
myosin heavy chain 10	MYH10_RAT	8.7	0.0058
histone deacetylase 1-like	D3ZVU7_RAT	8.2	0.00092
solute carrier family 24 member 1	A0A0G2K8E1_RAT	8.1	0.00064
RAB7A, member RAS oncogene family	A0A0G2K930_RAT	7.9	0.022
proteasome 26S subunit, non-ATPase 13	PSD13_RAT	7.7	0.00012
ATPase plasma membrane Ca2+ transporting 1	AT2B1_RAT	7.4	0.0045
SEC31 homolog A, COPII coat complex component	A0A0G2K0X9_RAT	7.2	0.0037
catenin beta 1	CTNB1_RAT	7.1	0.00027
ATP citrate lyase	A0A0G2K5E7_RAT	6.2	0.00059
ATPase Na+/K+ transporting subunit beta 3	AT1B3_RAT	6.1	0.00031
protein kinase C alpha	F1LS98_RAT	6.1	0.0051
crystallin beta A2	Q8CGQ0_RAT	6	0.015
LanC like 2	Q68FQ9_RAT	6	0.0017
glycogen phosphorylase B	G3V6Y6_RAT	5.9	0.0022
bleomycin hydrolase	BLMH_RAT	5.7	0.018
crystallin beta A1	CRBA1_RAT	5.7	0.017
solute carrier family 6 member 11	S6A11_RAT	5.7	0.0019
COP9 signalosome subunit 3	CSN3_RAT	5.6	0.00032
glycerol-3-phosphate dehydrogenase 1 like	D3ZAP9_RAT	5.6	0.00065
myosin heavy chain 9	MYH9_RAT	5.4	0.0015
hexokinase 2	HXK2_RAT	5.3	0.00025
talin 1	G3V852_RAT	5.3	0.041
ankyrin 2	F1LM42_RAT	5.2	0.003
solute carrier family 2 member 1	A0A0G2K2S2_RAT	5.2	0.0016
dynein cytoplasmic 1 heavy chain 1	M0R9X8_RAT	5.1	0.0013
ubiquitin specific peptidase 9 X-linked	A0A0G2K2C7_RAT	5.1	0.031
aminolevulinate dehydratase	HEM2_RAT	5	0.0016
actin related protein 2/3 complex subunit 1A	ARC1A_RAT	4.9	0.0043
chromosome segregation 1 like	D3ZPR0_RAT	4.8	0.0012
rabphilin 3A	F1LPB9_RAT	4.8	0.03
ATPase Na+/K+ transporting subunit beta 2	Q5M9H4_RAT	4.7	0.0066
collagen type XVIII alpha 1 chain	F1LR02_RAT	4.7	0.033
glycoprotein M6A	A0A1B0GWN8_RAT	4.6	0.0035
solute carrier family 6 member 1	SC6A1_RAT	4.6	0.0014
rhodopsin	A0A0G2JSY7_RAT	4.5	0.0014
mitogen-activated protein kinase 1	MK01_RAT	4.4	0.0004
aldehyde dehydrogenase 7 family member A1	AL7A1_RAT	4.3	0.0091
ATPase H+ transporting V0 subunit a1	Q2I6B2_RAT	4.3	0.027
hepatocyte growth factor-regulated tyrosine kinase substrate	A0A140TAH1_RAT	4.3	0.00041
solute carrier family 1 member 3	A0A0G2KAS7_RAT	4.2	0.0067
ATPase Na+/K+ transporting subunit beta 1	AT1B1_RAT	4.1	0.0068
phosphofructokinase, muscle	A0A0G2KBC7_RAT	4.1	0.00015
synaptojanin 1	SYNJ1_RAT	4.1	0.0094
exportin 1	XPO1_RAT	4.1	0.0031
drebrin 1	A0A0H2UHL9_RAT	4	0.0048
Rac family small GTPase 1	A0A0G2K0X4_RAT	4	0.028
thimet oligopeptidase 1	THOP1_RAT	4	0.0025
CaM kinase like vesicle associated	CAMKV_RAT	3.9	0.00019
Dmx like 2	F1M3W5_RAT	3.9	0.032
lysyl-tRNA synthetase	SYK_RAT	3.9	0.00036
uridine monophosphate synthetase	Q4QQS7_RAT	3.9	0.0048
COP9 signalosome subunit 2	CSN2_RAT	3.8	0.007
hydroxysteroid 17-beta dehydrogenase 12	D3ZPU3_RAT	3.8	0.025
synaptotagmin 1	SYT1_RAT	3.8	0.014
transportin 1	F1LQP9_RAT	3.8	0.017
host cell factor C1	D3ZN95_RAT	3.7	0.0068
histone deacetylase 2	F7ENH8_RAT	3.7	0.00065
methionine adenosyltransferase 2B	A0A0G2JT30_RAT	3.7	0.017
methylthioribose-1-phosphate isomerase 1	MTNA_RAT	3.7	0.0027
neurotrimin	G3V964_RAT	3.7	0.0012
reticulon 3	RTN3_RAT	3.7	0.012
dyskerin pseudouridine synthase 1	A0A0G2K700_RAT	3.6	0.042
fatty acid synthase	FAS_RAT	3.6	0.0054
heat shock protein family H (Hsp110) member 1	HS105_RAT	3.6	0.045
malic enzyme 2	A0A0G2K502_RAT	3.6	0.0036
small nuclear ribonucleoprotein U5 subunit 200	M3ZCQ2_RAT	3.6	0.005
synaptic vesicle glycoprotein 2A	SV2A_RAT	3.6	0.024
protein phosphatase methylesterase 1	PPME1_RAT	3.5	0.00048
RAB2A, member RAS oncogene family	F1LP82_RAT	3.5	0.0034
solute carrier family 16 member 1	MOT1_RAT	3.5	0.017
solute carrier family 32 member 1	VIAAT_RAT	3.5	0.018
G protein subunit alpha z	GNAZ_RAT	3.4	0.0039
interleukin enhancer binding factor 3	A0A0G2K2T6_RAT	3.4	0.0088
inositol polyphosphate-1-phosphatase	Q5RJK6_RAT	3.4	0.034
PDZ and LIM domain 5	PDLI5_RAT	3.4	0.02
septin 3	F1LMH0_RAT	3.4	0.00019
seryl-tRNA synthetase	A0A0G2JZG7_RAT	3.3	0.0099
AP2 associated kinase 1	AAK1_RAT	3.2	0.0052
proteasome 26S subunit, ATPase 2	G3V7L6_RAT	3.2	0.0026
tubulin folding cofactor C	B2GUZ7_RAT	3.2	0.01
tryptophanyl-tRNA synthetase	F8WFH8_RAT	3.2	0.0028
coatomer protein complex subunit gamma 2	A0A0H2UHV9_RAT	3.1	0.011
dynactin subunit 4	DCTN4_RAT	3.1	0.015
DExH-box helicase 9	D4A9D6_RAT	3.1	0.023
microtubule associated protein 4	A0A0G2JW88_RAT	3.1	0.0013
Bardet-Biedl syndrome 1	D4A4U2_RAT	3	0.041
nuclear mitotic apparatus protein 1	F1LW91_RAT	3	0.045
ras homolog family member A	RHOA_RAT	3	0.0037
RP1 like 1	M0R410_RAT	3	0.013
USO1 vesicle transport factor	USO1_RAT	3	0.0035
guanosine monophosphate reductase	F1LRV6_RAT	2.9	0.024
glutathione-disulfide reductase	F1LRE1_RAT	2.9	0.029
sarcolemma associated protein	A0A0G2JWA5_RAT	2.9	0.00051
adaptor protein, phosphotyrosine interacting with PH domain and leucine zipper 1	D3ZWA8_RAT	2.8	0.001
calpain 2	CAN2_RAT	2.8	0.048
crystallin beta B2	CRBB2_RAT	2.8	0.044
dynamin 3	DYN3_RAT	2.8	0.015
microtubule associated protein 1A	A0A0G2K5C6_RAT	2.8	0.049
NEDD8 activating enzyme E1 subunit 1	F1M7W7_RAT	2.8	0.033
phosphoglycerate dehydrogenase	SERA_RAT	2.8	0.016
SH3 domain GRB2 like endophilin interacting protein 1	F1M1Y0_RAT	2.8	0.018
ubiquitin specific peptidase 7	F1LM09_RAT	2.8	0.009
alpha-2-macroglobulin	A2MG_RAT	2.6	0.0074
actin related protein 2	ARP2_RAT	2.6	0.018
biliverdin reductase A	Q6AZ33_RAT	2.6	0.033
eukaryotic translation elongation factor 2	EF2_RAT	2.6	0.003
elongation factor Tu GTP binding domain containing 2	F1LM66_RAT	2.6	0.0025
FYVE and coiled-coil domain containing 1	D3Z9D2_RAT	2.6	0.018
phytanoyl-CoA 2-hydroxylase interacting protein like	PHIPL_RAT	2.6	0.049
U2 small nuclear RNA auxiliary factor 2	F2Z3T9_RAT	2.6	0.013
ceruloplasmin	A0A0G2K9I6_RAT	2.5	0.0028
aminopeptidase puromycin sensitive	F1M9V7_RAT	2.5	0.0002
phosphodiesterase 6A	D3Z8C9_RAT	2.5	0.00044
StAR related lipid transfer domain containing 10	Q5BJN1_RAT	2.5	0.012
DEAD-box helicase 6	D3ZD73_RAT	2.4	0.036
DEAH-box helicase 15	D3ZD97_RAT	2.4	0.013
glutamate decarboxylase 1	DCE1_RAT	2.4	0.035
glutamate decarboxylase 2	DCE2_RAT	2.4	0.0059
1,4-alpha-glucan branching enzyme 1	A0A096MJY6_RAT	2.4	0.039
protein phosphatase, Mg2+/Mn2+ dependent 1H	PPM1H_RAT	2.4	0.0062
ubiquitin like modifier activating enzyme 2	F1LS72_RAT	2.4	0.0035
adaptor related protein complex 2 subunit beta 1	AP2B1_RAT	2.3	0.00059
hexokinase 1	HXK1_RAT	2.3	0.011
karyopherin subunit alpha 3	Q56R18_RAT	2.3	0.041
leukotriene A4 hydrolase	Q499P2_RAT	2.3	0.0057
neural precursor cell expressed, developmentally down-regulated 4	A0A0G2K0B4_RAT	2.3	0.033
nudix hydrolase 2	AP4A_RAT	2.3	0.0099
phosphogluconate dehydrogenase	6PGD_RAT	2.3	0.0091
ribosomal protein L5	RL5_RAT	2.3	0.031
secernin 1	SCRN1_RAT	2.3	0.00011
aspartyl aminopeptidase	Q4V8H5_RAT	2.2	0.016
glucosidase II alpha subunit	D3ZAN3_RAT	2.2	0.0032
inosine triphosphatase	ITPA_RAT	2.2	0.034
NME/NM23 nucleoside diphosphate kinase 3	G3V816_RAT	2.2	0.003
ribosomal protein L3	RL3_RAT	2.2	0.036
activator of HSP90 ATPase activity 1	B0BN63_RAT	2.1	0.017
phosphoribosylglycinamide formyltransferase, phosphoribosylglycinamide synthetase, phosphoribosylaminoimidazole synthetase	G3V918_RAT	2.1	0.043
microtubule associated protein 6	MAP6_RAT	2.1	0.0013
RAB3A, member RAS oncogene family	RAB3A_RAT	2.1	0.018
aldo-keto reductase family 1, member C19	D3ZEL2_RAT	2	0.0029
coronin 1B	G3V940_RAT	2	0.0077
dynamin 1	DYN1_RAT	2	0.029
SPT5 homolog, DSIF elongation factor subunit	E9PTB2_RAT	2	0.0072
acyl-CoA binding domain containing 7	D3ZB36_RAT	-2	0.0018
acylphosphatase 1	D4A6X4_RAT	-2	0.045
ATPase H+ transporting V1 subunit E1	G3V7L8_RAT	-2	0.0044
calreticulin	CALR_RAT	-2	0.0022
cell division cycle 37	CDC37_RAT	-2	0.038
canopy FGF signaling regulator 2	A0JN30_RAT	-2	0.018
COP9 signalosome subunit 8	CSN8_RAT	-2	0.012
cytochrome c, somatic	CYC_RAT	-2	0.029
drebrin like	DBNL_RAT	-2	0.037
dynactin subunit 2	A0A0G2JUC7_RAT	-2	0.0057
DEK proto-oncogene	DEK_RAT	-2	0.045
enoyl-CoA delta isomerase 1	ECI1_RAT	-2	0.016
elongin B	ELOB_RAT	-2	0.018
fructosamine 3 kinase related protein	B2RYN1_RAT	-2	0.039
histone cluster 1 H2B family member n	D3ZWM5_RAT	-2	0.0041
heterogeneous nuclear ribonucleoprotein H1	HNRH1_RAT	-2	0.00095
heterogeneous nuclear ribonucleoprotein H3	D4ABK7_RAT	-2	0.039
heat shock protein family A (Hsp70) member 5	BIP_RAT	-2	0.0017
lamin B2	D3ZLC1_RAT	-2	0.0084
nascent polypeptide associated complex subunit alpha	M0R9L0_RAT	-2	0.026
NSFL1 cofactor	NSF1C_RAT	-2	0.0075
protein kinase C substrate 80K-H	B1WC34_RAT	-2	0.017
prosaposin	SAP_RAT	-2	0.029
parathymosin	PTMS_RAT	-2	0.037
RAD23 homolog B, nucleotide excision repair protein	RD23B_RAT	-2	0.0076
radixin	E9PT65_RAT	-2	0.049
ribosomal protein S21	A0A0G2JXC3_RAT	-2	0.015
septin 2	SEPT2_RAT	-2	0.044
SH3 domain containing GRB2 like 2, endophilin A1	SH3G2_RAT	-2	0.00037
small nuclear ribonucleoprotein D1 polypeptide	B2RZB7_RAT	-2	0.015
small nuclear ribonucleoprotein D3 polypeptide	M0R907_RAT	-2	0.022
serine and arginine rich splicing factor 1	D4A9L2_RAT	-2	0.0036
ATP synthase F1 subunit beta	ATPB_RAT	-2.5	0.00071
ATP synthase peripheral stalk subunit OSCP	ATPO_RAT	-2.5	0.017
basic transcription factor 3	Q5U3Y8_RAT	-2.5	0.046
chromosome 12 open reading frame 43	CSTOS_RAT	-2.5	0.0044
centrin 2	G3V9W0_RAT	-2.5	0.039
cold inducible RNA binding protein	CIRBP_RAT	-2.5	0.0094
clathrin light chain A	A0A0G2JYW3_RAT	-2.5	0.0014
clusterin	CLUS_RAT	-2.5	0.019
cytochrome c oxidase subunit 6B1	D3ZD09_RAT	-2.5	0.029
complexin 3	D4ABY0_RAT	-2.5	0.012
cystatin C	CYTC_RAT	-2.5	0.0012
eukaryotic translation initiation factor 4B	Q5RKG9_RAT	-2.5	0.022
glutaredoxin 5	D4ADD7_RAT	-2.5	0.029
heat shock protein family D (Hsp60) member 1	CH60_RAT	-2.5	0.016
LSM2 homolog, U6 small nuclear RNA and mRNA degradation associated	A0A0G2K8Q7_RAT	-2.5	0.043
NSF attachment protein gamma	A0A0G2K350_RAT	-2.5	0.028
protein kinase C and casein kinase substrate in neurons 2	PACN2_RAT	-2.5	0.0044
Purkinje cell protein 2	D3ZXP8_RAT	-2.5	0.024
peroxisomal biogenesis factor 19	A0A0G2JY69_RAT	-2.5	0.043
prefoldin subunit 1	D3ZX38_RAT	-2.5	0.043
prefoldin subunit 2	PFD2_RAT	-2.5	0.026
prohibitin	PHB_RAT	-2.5	0.0077
protein phosphatase, Mg2+/Mn2+ dependent 1B	Q99ND8_RAT	-2.5	0.0029
protein phosphatase 1 regulatory inhibitor subunit 1B	PPR1B_RAT	-2.5	0.05
ribosomal protein lateral stalk subunit P2	D4A4D5_RAT	-2.5	0.0013
RuvB like AAA ATPase 2	G3V8T5_RAT	-2.5	0.034
SH3 domain containing GRB2 like 1, endophilin A2	SH3G1_RAT	-2.5	0.011
sirtuin 2	A0A0G2JWM2_RAT	-2.5	0.028
sorcin	B0BNJ1_RAT	-2.5	0.021
serine and arginine rich splicing factor 4	G3V798_RAT	-2.5	0.042
serine and arginine rich splicing factor 7	D4A720_RAT	-2.5	0.0015
transgelin 3	TAGL3_RAT	-2.5	0.013
translocase of inner mitochondrial membrane 9	TIM9_RAT	-2.5	0.024
tropomodulin 2	TMOD2_RAT	-2.5	0.022
ubiquinol-cytochrome c reductase hinge protein like	QCR6_RAT	-2.5	0.00038
WT1 associated protein	D3ZPY0_RAT	-2.5	0.046
adducin 2	ADDB_RAT	-3.333	0.03
annexin A3	ANXA3_RAT	-3.333	0.024
apolipoprotein E	A0A0G2K151_RAT	-3.333	0.041
ATP synthase F1 subunit delta	G3V7Y3_RAT	-3.333	0.0068
ATP synthase peripheral stalk subunit F6	ATP5J_RAT	-3.333	0.001
calumenin	G3V6S3_RAT	-3.333	0.016
capping actin protein of muscle Z-line subunit alpha 1	CAZA1_RAT	-3.333	0.035
cell division cycle 26	CDC26_RAT	-3.333	0.016
centrin 1	G3V832_RAT	-3.333	0.029
coiled-coil-helix-coiled-coil-helix domain containing 3	D3ZUX5_RAT	-3.333	0.018
charged multivesicular body protein 5	CHMP5_RAT	-3.333	0.02
cytochrome c oxidase subunit 5A	COX5A_RAT	-3.333	0.00035
cytochrome c oxidase subunit 5B	COX5B_RAT	-3.333	0.003
complexin 1	CPLX1_RAT	-3.333	0.017
CRK proto-oncogene, adaptor protein	CRK_RAT	-3.333	0.0057
DnaJ heat shock protein family (Hsp40) member B2	B2RYA8_RAT	-3.333	0.018
eukaryotic translation initiation factor 3 subunit J	EIF3J_RAT	-3.333	0.018
GRIP1 associated protein 1	GRAP1_RAT	-3.333	0.043
3-hydroxyisobutyrate dehydrogenase	3HIDH_RAT	-3.333	0.017
internexin neuronal intermediate filament protein alpha	G3V8Q2_RAT	-3.333	0.017
keratin 10	A0A0G2K2V6_RAT	-3.333	0.02
lin-7 homolog C, crumbs cell polarity complex component	LIN7C_RAT	-3.333	0.00016
LDL receptor related protein associated protein 1	AMRP_RAT	-3.333	0.018
microtubule associated protein RP/EB family member 1	MARE1_RAT	-3.333	0.016
NADH:ubiquinone oxidoreductase core subunit V2	NDUV2_RAT	-3.333	0.019
NADH:ubiquinone oxidoreductase subunit V3	G3V644_RAT	-3.333	0.045
nucleobindin 1	NUCB1_RAT	-3.333	0.04
cAMP-dependent protein kinase inhibitor alpha	IPKA_RAT	-3.333	0.03
protein phosphatase, Mg2+/Mn2+ dependent 1A	A0A0H2UHE5_RAT	-3.333	0.00085
protein phosphatase 1 regulatory subunit 7	PP1R7_RAT	-3.333	0.015
proteasome 26S subunit, non-ATPase 4	O88321_RAT	-3.333	0.012
proteasome 26S subunit, non-ATPase 9	G3V9P0_RAT	-3.333	0.016
RNA binding motif protein 3	G3V6P6_RAT	-3.333	0.0025
secretagogin, EF-hand calcium binding protein	F1LN07_RAT	-3.333	0.05
sterol carrier protein 2	F1LQ55_RAT	-3.333	0.011
small nuclear ribonucleoprotein polypeptide A	Q5U214_RAT	-3.333	0.046
serine and arginine rich splicing factor 6	SRSF6_RAT	-3.333	0.0026
serine and arginine rich splicing factor 10	Q4KM38_RAT	-3.333	0.0011
small ubiquitin-like modifier 1	SUMO1_RAT	-3.333	0.00027
tubulin folding cofactor A	TBCA_RAT	-3.333	0.034
transcription elongation factor A1	TCEA1_RAT	-3.333	0.0027
TERF2 interacting protein	TE2IP_RAT	-3.333	0.017
thyroid hormone receptor associated protein 3	TR150_RAT	-3.333	0.02
tropomodulin 3	Q6AXW2_RAT	-3.333	0.046
tropomyosin 3	TPM3_RAT	-3.333	0.009
thioredoxin domain containing 12	TXD12_RAT	-3.333	0.03
thioredoxin reductase 1	R9PXU4_RAT	-3.333	0.013
acetyl-CoA acetyltransferase 1	THIL_RAT	-5	0.044
BCAS2 pre-mRNA processing factor	B5DFM8_RAT	-5	0.029
caldesmon 1	A0A0G2JTV2_RAT	-5	0.013
CCHC-type zinc finger nucleic acid binding protein	CNBP_RAT	-5	0.013
chondromodulin	A0JPL7_RAT	-5	0.03
cytochrome c oxidase assembly factor 6	A0A0G2JUM8_RAT	-5	0.0055
C-reactive protein	A0A0G2K8V5_RAT	-5	0.029
CWC15 spliceosome associated protein homolog	CWC15_RAT	-5	0.02
DnaJ heat shock protein family (Hsp40) member B11	DJB11_RAT	-5	0.023
down-regulator of transcription 1	NC2B_RAT	-5	0.0058
eukaryotic translation elongation factor 1 beta 2	B5DEN5_RAT	-5	0.018
eukaryotic translation initiation factor 3 subunit I	EIF3I_RAT	-5	0.006
G protein subunit gamma transducin 2	D3ZLD6_RAT	-5	0.0091
guanylate cyclase activator 1B	D3ZID7_RAT	-5	0.0095
histidine triad nucleotide binding protein 2	D4AB01_RAT	-5	0.0026
heat shock protein family E (Hsp10) member 1	CH10_RAT	-5	0.0014
Jupiter microtubule associated homolog 1	JUPI1_RAT	-5	0.02
LSM3 homolog, U6 small nuclear RNA and mRNA degradation associated	D4A7U6_RAT	-5	0.029
microfibril associated protein 1	D4ACM9_RAT	-5	0.049
NADH:ubiquinone oxidoreductase subunit A2	D3ZS58_RAT	-5	0.0095
NADH:ubiquinone oxidoreductase subunit A6	D4A3V2_RAT	-5	0.016
neurofilament light	NFL_RAT	-5	0.0036
Purkinje cell protein 4	PCP4_RAT	-5	0.00089
PDGFA associated protein 1	HAP28_RAT	-5	0.042
protein phosphatase 1 regulatory inhibitor subunit 2	IPP2_RAT	-5	0.0047
proteasome subunit beta 4	G3V8U9_RAT	-5	0.0076
serpin family H member 1	Q5RJR9_RAT	-5	0.04
splicing factor 3b subunit 2	D3ZMS1_RAT	-5	0.028
stathmin 1	A0A096MK73_RAT	-5	0.0062
small ubiquitin-like modifier 2	SUMO2_RAT	-5	0.022
synapse associated protein 1	F7F350_RAT	-5	0.0096
translocase of inner mitochondrial membrane 10	TIM10_RAT	-5	0.0062
translocase of inner mitochondrial membrane 8 homolog B	TIM8B_RAT	-5	0.012
tenascin R	A0A096MJE6_RAT	-5	0.022
toll interacting protein	TOLIP_RAT	-5	0.019
ubiquilin 1	A0A140TAI1_RAT	-5	0.01
zinc finger protein 428	D4A7Q6_RAT	-5	0.04
asparaginase like 1	ASGL1_RAT	-10	0.024
chromobox 5	B2RYU7_RAT	-10	0.0068
CDC42 effector protein 4	B1WC33_RAT	-10	0.022
cortactin	A0A0G2JZ13_RAT	-10	0.0075
high mobility group nucleosome binding domain 5B	HMGN5_RAT	-10	0.013
myeloid derived growth factor	M0R3V4_RAT	-10	0.011
myosin light chain 12A	A0A0G2JSW0_RAT	-10	0.0059
NADH:ubiquinone oxidoreductase subunit B10	D4A0T0_RAT	-10	0.0054
neurofilament, medium polypeptide	G3V7S2_RAT	-10	0.042
nucleobindin 2	G3V8R1_RAT	-10	0.018
pyruvate dehydrogenase E1 beta subunit	A0A0G2KAM3_RAT	-10	0.011
prefoldin subunit 6	Q6MGC4_RAT	-10	0.012
prolactin induced protein	G3V812_RAT	-10	0.013
translocase of inner mitochondrial membrane 8A	F1LP21_RAT	-10	0.029
translocase of outer mitochondrial membrane 22	TOM22_RAT	-10	0.01
ubiquinol-cytochrome c reductase binding protein	B2RYS2_RAT	-10	0.0072
reticulocalbin 2	RCN2_RAT	-11.111	0.0078
transgelin 2	TAGL2_RAT	-11.111	0.0071
leucine zipper transcription factor like 1	LZTL1_RAT	-12.5	0.036
dynein light chain roadblock-type 1	DLRB1_RAT	-14.286	0.00064
histone cluster 1, H1b	H15_RAT	-20	0.0034

## Sheet: Sheet1
Entrez Gene Name	UniProt/Swiss-Prot Accession	Expr Fold Change
histone cluster 1, H1b	H15_RAT	-20
dynein light chain roadblock-type 1	DLRB1_RAT	-14.286
leucine zipper transcription factor like 1	LZTL1_RAT	-12.5
transgelin 2	TAGL2_RAT	-11.111
reticulocalbin 2	RCN2_RAT	-11.111
NADH:ubiquinone oxidoreductase subunit B10	D4A0T0_RAT	-10
myosin light chain 12A	A0A0G2JSW0_RAT	-10
chromobox 5	B2RYU7_RAT	-10
ubiquinol-cytochrome c reductase binding protein	B2RYS2_RAT	-10
cortactin	A0A0G2JZ13_RAT	-10
translocase of outer mitochondrial membrane 22	TOM22_RAT	-10
myeloid derived growth factor	M0R3V4_RAT	-10
pyruvate dehydrogenase E1 beta subunit	A0A0G2KAM3_RAT	-10
prefoldin subunit 6	Q6MGC4_RAT	-10
high mobility group nucleosome binding domain 5B	HMGN5_RAT	-10
prolactin induced protein	G3V812_RAT	-10
nucleobindin 2	G3V8R1_RAT	-10
CDC42 effector protein 4	B1WC33_RAT	-10
asparaginase like 1	ASGL1_RAT	-10
translocase of inner mitochondrial membrane 8A	F1LP21_RAT	-10
neurofilament, medium polypeptide	G3V7S2_RAT	-10
Purkinje cell protein 4	PCP4_RAT	-5
heat shock protein family E (Hsp10) member 1	CH10_RAT	-5
histidine triad nucleotide binding protein 2	D4AB01_RAT	-5
neurofilament light	NFL_RAT	-5
protein phosphatase 1 regulatory inhibitor subunit 2	IPP2_RAT	-5
cytochrome c oxidase assembly factor 6	A0A0G2JUM8_RAT	-5
down-regulator of transcription 1	NC2B_RAT	-5
eukaryotic translation initiation factor 3 subunit I	EIF3I_RAT	-5
stathmin 1	A0A096MK73_RAT	-5
translocase of inner mitochondrial membrane 10	TIM10_RAT	-5
proteasome subunit beta 4	G3V8U9_RAT	-5
G protein subunit gamma transducin 2	D3ZLD6_RAT	-5
guanylate cyclase activator 1B	D3ZID7_RAT	-5
NADH:ubiquinone oxidoreductase subunit A2	D3ZS58_RAT	-5
synapse associated protein 1	F7F350_RAT	-5
ubiquilin 1	A0A140TAI1_RAT	-5
translocase of inner mitochondrial membrane 8 homolog B	TIM8B_RAT	-5
caldesmon 1	A0A0G2JTV2_RAT	-5
CCHC-type zinc finger nucleic acid binding protein	CNBP_RAT	-5
NADH:ubiquinone oxidoreductase subunit A6	D4A3V2_RAT	-5
eukaryotic translation elongation factor 1 beta 2	B5DEN5_RAT	-5
toll interacting protein	TOLIP_RAT	-5
CWC15 spliceosome associated protein homolog	CWC15_RAT	-5
Jupiter microtubule associated homolog 1	JUPI1_RAT	-5
small ubiquitin-like modifier 2	SUMO2_RAT	-5
tenascin R	A0A096MJE6_RAT	-5
DnaJ heat shock protein family (Hsp40) member B11	DJB11_RAT	-5
splicing factor 3b subunit 2	D3ZMS1_RAT	-5
BCAS2 pre-mRNA processing factor	B5DFM8_RAT	-5
C-reactive protein	A0A0G2K8V5_RAT	-5
LSM3 homolog, U6 small nuclear RNA and mRNA degradation associated	D4A7U6_RAT	-5
chondromodulin	A0JPL7_RAT	-5
serpin family H member 1	Q5RJR9_RAT	-5
zinc finger protein 428	D4A7Q6_RAT	-5
PDGFA associated protein 1	HAP28_RAT	-5
acetyl-CoA acetyltransferase 1	THIL_RAT	-5
microfibril associated protein 1	D4ACM9_RAT	-5
lin-7 homolog C, crumbs cell polarity complex component	LIN7C_RAT	-3.333
small ubiquitin-like modifier 1	SUMO1_RAT	-3.333
cytochrome c oxidase subunit 5A	COX5A_RAT	-3.333
protein phosphatase, Mg2+/Mn2+ dependent 1A	A0A0H2UHE5_RAT	-3.333
ATP synthase peripheral stalk subunit F6	ATP5J_RAT	-3.333
serine and arginine rich splicing factor 10	Q4KM38_RAT	-3.333
RNA binding motif protein 3	G3V6P6_RAT	-3.333
serine and arginine rich splicing factor 6	SRSF6_RAT	-3.333
transcription elongation factor A1	TCEA1_RAT	-3.333
cytochrome c oxidase subunit 5B	COX5B_RAT	-3.333
CRK proto-oncogene, adaptor protein	CRK_RAT	-3.333
ATP synthase F1 subunit delta	G3V7Y3_RAT	-3.333
tropomyosin 3	TPM3_RAT	-3.333
sterol carrier protein 2	F1LQ55_RAT	-3.333
proteasome 26S subunit, non-ATPase 4	O88321_RAT	-3.333
thioredoxin reductase 1	R9PXU4_RAT	-3.333
protein phosphatase 1 regulatory subunit 7	PP1R7_RAT	-3.333
calumenin	G3V6S3_RAT	-3.333
cell division cycle 26	CDC26_RAT	-3.333
microtubule associated protein RP/EB family member 1	MARE1_RAT	-3.333
proteasome 26S subunit, non-ATPase 9	G3V9P0_RAT	-3.333
complexin 1	CPLX1_RAT	-3.333
3-hydroxyisobutyrate dehydrogenase	3HIDH_RAT	-3.333
internexin neuronal intermediate filament protein alpha	G3V8Q2_RAT	-3.333
TERF2 interacting protein	TE2IP_RAT	-3.333
coiled-coil-helix-coiled-coil-helix domain containing 3	D3ZUX5_RAT	-3.333
DnaJ heat shock protein family (Hsp40) member B2	B2RYA8_RAT	-3.333
eukaryotic translation initiation factor 3 subunit J	EIF3J_RAT	-3.333
LDL receptor related protein associated protein 1	AMRP_RAT	-3.333
NADH:ubiquinone oxidoreductase core subunit V2	NDUV2_RAT	-3.333
charged multivesicular body protein 5	CHMP5_RAT	-3.333
keratin 10	A0A0G2K2V6_RAT	-3.333
thyroid hormone receptor associated protein 3	TR150_RAT	-3.333
annexin A3	ANXA3_RAT	-3.333
centrin 1	G3V832_RAT	-3.333
adducin 2	ADDB_RAT	-3.333
cAMP-dependent protein kinase inhibitor alpha	IPKA_RAT	-3.333
thioredoxin domain containing 12	TXD12_RAT	-3.333
tubulin folding cofactor A	TBCA_RAT	-3.333
capping actin protein of muscle Z-line subunit alpha 1	CAZA1_RAT	-3.333
nucleobindin 1	NUCB1_RAT	-3.333
apolipoprotein E	A0A0G2K151_RAT	-3.333
GRIP1 associated protein 1	GRAP1_RAT	-3.333
NADH:ubiquinone oxidoreductase subunit V3	G3V644_RAT	-3.333
small nuclear ribonucleoprotein polypeptide A	Q5U214_RAT	-3.333
tropomodulin 3	Q6AXW2_RAT	-3.333
secretagogin, EF-hand calcium binding protein	F1LN07_RAT	-3.333
ubiquinol-cytochrome c reductase hinge protein like	QCR6_RAT	-2.5
ATP synthase F1 subunit beta	ATPB_RAT	-2.5
cystatin C	CYTC_RAT	-2.5
ribosomal protein lateral stalk subunit P2	D4A4D5_RAT	-2.5
clathrin light chain A	A0A0G2JYW3_RAT	-2.5
serine and arginine rich splicing factor 7	D4A720_RAT	-2.5
protein phosphatase, Mg2+/Mn2+ dependent 1B	Q99ND8_RAT	-2.5
chromosome 12 open reading frame 43	CSTOS_RAT	-2.5
protein kinase C and casein kinase substrate in neurons 2	PACN2_RAT	-2.5
prohibitin	PHB_RAT	-2.5
cold inducible RNA binding protein	CIRBP_RAT	-2.5
SH3 domain containing GRB2 like 1, endophilin A2	SH3G1_RAT	-2.5
complexin 3	D4ABY0_RAT	-2.5
transgelin 3	TAGL3_RAT	-2.5
heat shock protein family D (Hsp60) member 1	CH60_RAT	-2.5
ATP synthase peripheral stalk subunit OSCP	ATPO_RAT	-2.5
clusterin	CLUS_RAT	-2.5
sorcin	B0BNJ1_RAT	-2.5
eukaryotic translation initiation factor 4B	Q5RKG9_RAT	-2.5
tropomodulin 2	TMOD2_RAT	-2.5
Purkinje cell protein 2	D3ZXP8_RAT	-2.5
translocase of inner mitochondrial membrane 9	TIM9_RAT	-2.5
prefoldin subunit 2	PFD2_RAT	-2.5
NSF attachment protein gamma	A0A0G2K350_RAT	-2.5
sirtuin 2	A0A0G2JWM2_RAT	-2.5
cytochrome c oxidase subunit 6B1	D3ZD09_RAT	-2.5
glutaredoxin 5	D4ADD7_RAT	-2.5
RuvB like AAA ATPase 2	G3V8T5_RAT	-2.5
centrin 2	G3V9W0_RAT	-2.5
serine and arginine rich splicing factor 4	G3V798_RAT	-2.5
LSM2 homolog, U6 small nuclear RNA and mRNA degradation associated	A0A0G2K8Q7_RAT	-2.5
peroxisomal biogenesis factor 19	A0A0G2JY69_RAT	-2.5
prefoldin subunit 1	D3ZX38_RAT	-2.5
basic transcription factor 3	Q5U3Y8_RAT	-2.5
WT1 associated protein	D3ZPY0_RAT	-2.5
protein phosphatase 1 regulatory inhibitor subunit 1B	PPR1B_RAT	-2.5
SH3 domain containing GRB2 like 2, endophilin A1	SH3G2_RAT	-2
heterogeneous nuclear ribonucleoprotein H1	HNRH1_RAT	-2
heat shock protein family A (Hsp70) member 5	BIP_RAT	-2
acyl-CoA binding domain containing 7	D3ZB36_RAT	-2
calreticulin	CALR_RAT	-2
serine and arginine rich splicing factor 1	D4A9L2_RAT	-2
histone cluster 1 H2B family member n	D3ZWM5_RAT	-2
ATPase H+ transporting V1 subunit E1	G3V7L8_RAT	-2
dynactin subunit 2	A0A0G2JUC7_RAT	-2
NSFL1 cofactor	NSF1C_RAT	-2
RAD23 homolog B, nucleotide excision repair protein	RD23B_RAT	-2
lamin B2	D3ZLC1_RAT	-2
COP9 signalosome subunit 8	CSN8_RAT	-2
ribosomal protein S21	A0A0G2JXC3_RAT	-2
small nuclear ribonucleoprotein D1 polypeptide	B2RZB7_RAT	-2
enoyl-CoA delta isomerase 1	ECI1_RAT	-2
protein kinase C substrate 80K-H	B1WC34_RAT	-2
canopy FGF signaling regulator 2	A0JN30_RAT	-2
elongin B	ELOB_RAT	-2
small nuclear ribonucleoprotein D3 polypeptide	M0R907_RAT	-2
nascent polypeptide associated complex subunit alpha	M0R9L0_RAT	-2
cytochrome c, somatic	CYC_RAT	-2
prosaposin	SAP_RAT	-2
drebrin like	DBNL_RAT	-2
parathymosin	PTMS_RAT	-2
cell division cycle 37	CDC37_RAT	-2
fructosamine 3 kinase related protein	B2RYN1_RAT	-2
heterogeneous nuclear ribonucleoprotein H3	D4ABK7_RAT	-2
septin 2	SEPT2_RAT	-2
acylphosphatase 1	D4A6X4_RAT	-2
DEK proto-oncogene	DEK_RAT	-2
radixin	E9PT65_RAT	-2
